# Supplementary material for: Intramolecular nucleophilic addition of carbanions generated from N-benzylamides to cyclopropenes
Source: Royal Society of Chemistry journal article supplement (doi:10.1039/c7ob02068f), 2017-12-08
Supplement: c7ob02068f1.pdf [file c7ob02068f1.pdf]

# Intramolecular Nucleophilic Addition of Carbanions Generated from *N*-Benzylamines to Cyclopropenes

Vladimir Maslivetc, Colby Barrett, Nicolai A. Aksenov, Marina Rubina, and Michael Rubin\*

## Supporting Information

### Table of content

|                                                                  |     |
|------------------------------------------------------------------|-----|
| Syntheses of bromocyclopropanes <b>8a-m</b>                      | S2  |
| NMR spectral charts                                              | S10 |
| Optimized geometries of <i>exo</i> - and <i>endo</i> - <b>7g</b> | S77 |
| X-Ray crystallography data for <i>exo</i> - <b>7j</b>            | S79 |
| GC Traces                                                        | S85 |

## Syntheses of bromocyclopropanes **8a-m**

2-Bromo-1-methylcyclopropane-1-carbonyl chloride was synthesized according to our previously published procedure and had physical and spectral properties identical to those earlier reported.

***N,N*-Dibenzyl-2-bromo-1-methylcyclopropane-1-carboxamide (8a)**, Typical procedure I: 2-Bromo-1-methylcyclopropane-1-carbonyl chloride (494 mg, 2.50 mmol) in anhydrous DCM (7 mL) was added dropwise to a solution of dibenzylamine (493 mg, 2.50 mmol) and triethylamine (706  $\mu$ L, 512 mg, 5.07 mmol) in anhydrous DCM (4 mL) stirred in a flame dried Schlenk flask under a nitrogen atmosphere. The reaction was stirred overnight at rt. The solvent was then evaporated in vacuum, and the residue was triturated with THF (7 mL). The precipitate was removed by suction filtration and the filter cake was rinsed with THF (2 x 4 mL). Then the precipitate was dissolved in H<sub>2</sub>O (20 mL) and extracted with EtOAc (2 x 4 mL). The combined organic phases were washed with brine (20 mL, dried with MgSO<sub>4</sub>, combined with the THF filtrate, and concentrated. The product was isolated by column chromatography eluting with a hexanes/EtOAc mixture (6:1) as a yellow oil (*R*<sub>f</sub> 0.29). Yield 553.4 mg (1.54 mmol, 61%). <sup>1</sup>H NMR (500 MHz, CDCl<sub>3</sub>)  $\delta$  [7.51 – 7.48 (m), 7.42 – 7.27 (m), 7.25 – 7.06 (m),  $\Sigma$ 10H], [5.25 (d, *J* = 14.5 Hz), 4.98 (d, *J* = 16.6 Hz), 4.73 – 7.46 (m), 4.37 (d, *J* = 16.7 Hz), 3.91 (d, *J* = 14.5 Hz),  $\Sigma$ 4H], [3.24 (dd, *J* = 8.2, 4.9 Hz), 3.00 (dd, *J* = 7.5, 4.7 Hz),  $\Sigma$ 1H], [1.81 (dd, *J* = 8.2, 6.7 Hz), 1.76 – 1.73 (m),  $\Sigma$ 1H], [1.53 (s), 1.40 (s),  $\Sigma$ 3H], [1.25 (t, *J* = 7.1 Hz), 0.95 (dd, *J* = 6.7, 4.9 Hz),  $\Sigma$ 1H]; <sup>13</sup>C NMR (126 MHz, CDCl<sub>3</sub>)  $\delta$  (172.5, 171.3, 1C), (136.7, 136.1, 2C), (129.1, 128.9, 4C), (128.3, 127.1, 4C), (127.6, 127.4, 2C), (49.8, 47.5, 1C), [49.6 (br), 47.1 (br), 1C], 28.0 (1C), (27.3, 26.1, 1C), (22.7, 21.9, 1C), (22.1, 19.8, 1C); FT IR (NaCl, cm<sup>-1</sup>): 3062, 3030, 2929, 1643, 1495, 1453, 1421, 1325, 1299, 1205, 1185, 1079, 1029, 1013, 749, 698; HRMS (TOF ES): found 358.0810, calculated for C<sub>19</sub>H<sub>21</sub>BrNO (M + H) 358.0807 (0.8 ppm); EA found C 63.83, 63.58, H 5.43, 5.93, N 4.14, 3.90, calculated for C<sub>19</sub>H<sub>20</sub>BrNO: C 63.70, H 5.63; N 3.91.

***2-Bromo-N-butyl-N-(4-(tert-butyl)benzyl)-1-methylcyclopropane-1-carboxamide (8b)***. This compound was synthesized according to Typical procedure I employing 2-bromo-1-methylcyclopropane-1-carbonyl chloride (545 mg, 2.76 mmol), *N*-(4-(*tert*-butyl)benzyl)butan-1-amine (605 mg, 2.76 mmol), and triethylamine (1.40 mL, 1.02 g, 10.5 mmol). The reaction mixture was stirred at room temperature overnight. After standard aqueous workup and extraction, the material was filtered through a silica plug to give a pale-yellow glass, yield 882 mg (2.32 mmol, 84%). This material had purity by GC c.a. 98% and could be used in the cyclization step as is without additional purification. If desired, diastereomeric bromocyclopropanes can be additionally purified and separated by preparative column chromatography on Silica gel eluting with a CH<sub>2</sub>Cl<sub>2</sub>/EtOAc mixture (40:1). Individual isomers were isolated as colorless crystals (*trans*-**8b**) and colorless glass

(*cis*-**8b**), respectively. NMR spectra of both diastereomers showed signals of two rotamers. Analysis of signals in proton spectra of *cis*-**8b** is complicated by severe broadening of the lines, which can be partially resolved by measuring <sup>1</sup>H NMR spectrum in benzene-*d*<sub>6</sub> at 75 °C. **trans**-**8b**: mp 93.3-93.8 °C; R<sub>f</sub> 0.37 (CH<sub>2</sub>Cl<sub>2</sub>/EtOAc 40:1); <sup>1</sup>H NMR (500 MHz, CDCl<sub>3</sub>) δ [7.38 (d, *J* = 8.2 Hz), 7.30 (d, *J* = 8.2 Hz), Σ2H], [7.21 (d, *J* = 8.2 Hz), 7.17 (d, *J* = 8.1 Hz), 7.09 (d, *J* = 8.2 Hz), Σ2H], [5.04 (d, *J* = 16.8 Hz), 4.81 (d, *J* = 15.0 Hz), 4.63 (br.m), 4.46 (d, *J* = 16.3 Hz), Σ2H], [3.80 (ddd, *J* = 14.2, 10.8, 5.6 Hz), 3.53 (ddd, *J* = 13.9, 11.5, 4.9 Hz), 3.25 (ddd, *J* = 14.1, 11.4, 4.9 Hz), 3.04 – 2.95 (m), 2.75 (ddd, *J* = 13.3, 10.0, 5.4 Hz), Σ3H], [1.80 – 1.70 (m), 1.71 – 1.64 (m), 1.63 – 1.52 (m), 1.52 – 1.43 (m), 1.26 – 1.16 (m), Σ6H], [1.42 (s), 1.32 (s), Σ3H], [1.32 (s), 1.29 (s), Σ9H], [0.92 (t, *J* = 7.4 Hz), 0.86 (t, *J* = 7.3 Hz), Σ3H]; <sup>13</sup>C NMR (126 MHz, CDCl<sub>3</sub>) δ (170.7, 170.6, 1C), (150.5, 150.1, 1C), (134.2, 133.8, 1C), (127.8, 126.5, 2C), (125.8, 125.3, 2C), (50.5, 47.3, 1C), (46.7, 45.4, 1C), (34.6, 34.6, 1C), 31.5 (3C), (30.5, 28.7, 1C), (28.2, 28.1, 1C), (26.3, 26.2, 1C), (22.7, 22.6, 1C), 22.1, 20.4, (14.0, 14.0 1C). **cis**-**8b**: R<sub>f</sub> 0.27 (CH<sub>2</sub>Cl<sub>2</sub>/EtOAc 40:1); <sup>1</sup>H NMR (500 MHz, C<sub>6</sub>D<sub>6</sub> at 75 °C) δ 7.26 (d, *J* = 8.3 Hz, 2H), 7.07 (br. s, 2H), 4.51 (br. s, 1H), 4.44 (d, *J* = 15.2 Hz, 1H), 3.29 – 3.04 (br. m, 3H), 1.70 (dd, *J* = 8.1, 6.5 Hz, 1H), [1.36 (s), 1.22 (s), Σ9H], 1.40 – 1.28 (m, 4H), 1.23 (br. s, 1H), 1.13 – 1.01 (m, 2H), 0.76 (t, *J* = 7.4 Hz, 3H), 0.65 (dd, *J* = 6.6, 4.9 Hz, 1H). <sup>1</sup>H NMR (500 MHz, CDCl<sub>3</sub> at RT) δ 7.38 – 7.30 (br. m, 2H), [7.28 – 7.25 (br.m), 7.13 – 7.05 (br. m), Σ2H], [4.65 (br.d, *J* = 16.3 Hz), 4.43 (br. d, *J* = 15.2 Hz), Σ2H], 3.35 – 3.14 (br.m, 3H), [1.76 (br.m), 1.68 (br.m), 1.57 (br.m), 1.50 (br.s), Σ6H], 1.32 (br.s, 11H), 1.00 – 0.78 (br.m, 4H); <sup>13</sup>C NMR (126 MHz, CDCl<sub>3</sub> at RT) δ 172.1, (150.7, 150.3, 1C), (134.2, 133.5, 1C), (127.5, 126.5, 2C), (125.9, 125.7, 2C), (50.3, 46.7, 1C), (46.3, 44.6, 1C), 34.6, 31.5 (3C), (30.2, 29.0, 1C), (27.8, 27.7, 1C), (26.3, 26.2, 1C), 21.9, (20.3, 20.2, 1C), (20.0, 19.9, 1C), 14.0. HRMS (TOF ES): found 402.1416, calculated for C<sub>20</sub>H<sub>30</sub>BrNONa (M + Na) 402.1408 (2.0 ppm). EA found C 63.05, 63.27, H 7.78, 8.03, N 3.87, 3.59, calculated for C<sub>20</sub>H<sub>30</sub>BrNO: C 63.15, H 7.95; N 3.68.

**2-Bromo-N-butyl-N-(4-methoxybenzyl)-1-methylcyclopropane-1-carboxamide**

(**8c**). This compound was synthesized according to Typical procedure I employing 2-bromo-1-methylcyclopropane-1-carbonyl chloride (584 mg, 2.96 mmol), *N*-(4-methoxybenzyl)butan-1-amine (572 mg, 2.96 mmol), and triethylamine (1.40 mL, 1.02 g, 10.5 mmol). The reaction mixture was stirred at room temperature overnight. After standard aqueous workup and extraction, the material was filtered through a silica plug to give a pale orange oil, yield 912 mg (2.58 mmol, 87%). This material had purity by GC c.a. 98% and could be used in the cyclization step as is without additional purification. If desired, it can be additionally purified by preparative column chromatography on Silica gel eluting with a CH<sub>2</sub>Cl<sub>2</sub>/EtOAc mixture (20:1) to isolated inseparable mixture of diastereomeric bromo-cyclopropanes **8c** as colorless oil, R<sub>f</sub> 0.45 (CH<sub>2</sub>Cl<sub>2</sub>/EtOAc 20:1). <sup>1</sup>H NMR (500 MHz, CDCl<sub>3</sub>) δ [7.22 (d, *J* = 8.6 Hz), 7.17 (d, *J* = 8.5 Hz), 7.09 (br.m), Σ2H], [6.91 (d, *J* = 8.6 Hz), 6.95 – 6.79 (br.m), 6.82 (d, *J* = 8.6 Hz), Σ2H], [5.00 (d, *J* = 16.5 Hz), 4.86 (d, *J* = 14.7 Hz), 4.61 (br.m), 4.44 (d, *J* = 16.6 Hz), 4.40 (br.m), 4.34 (d, *J* = 14.8 Hz), Σ2H], [3.81 (s), 8.80 (br.s), 3.78 (s), Σ3H], [3.78 – 3.69 (m), 3.51 (ddd, *J* = 14.1, 11.6, 4.9 Hz), 3.27 (br.m), 3.22 – 3.15 (m), 3.00 (ddd, *J* = 7.3, 4.7, 2.5 Hz), 2.76 (ddd, *J* = 13.4,

10.0, 5.4 Hz),  $\Sigma$ 2H], [1.80 – 1.70 (m), 1.70 – 1.64 (m), 1.62 – 1.49 (m), 1.46 – 1.41 (m), 1.33 – 1.15 (m),  $\Sigma$ 7H], [1.48 (s), 1.40 (s), 1.33 (s),  $\Sigma$ 3H], [0.93 (t,  $J$  = 7.4 Hz), 0.86 (t,  $J$  = 7.4 Hz),  $\Sigma$ 3H];  $^{13}\text{C}$  NMR (126 MHz,  $\text{CDCl}_3$ )  $\delta$  (172.0, 170.7, 1C), (159.1, 158.9, 1C), (129.7, 129.3, 128.1, 2C), (129.5, 128.7, 128.0, 1C), (114.4, 114.3, 114.1, 113.8, 2C), (55.4, 55.4, 55.3, 1C), (50.3, 50.1, 46.9, 46.5, 1C), (46.4, 46.1, 45.2, 44.5, 1C), (30.4, 30.2, 29.0, 28.7, 1C), (28.2, 28.2, 1C), (27.8, 27.6, 26.3, 26.2, 1C), (22.7, 22.6, 21.8, 1C), (22.0, 20.0, 19.8, 1C), (20.4, 20.3, 1C), (14.0, 14.0, 14.0, 1C); HRMS (TOF ES): found 376.0900, calculated for  $\text{C}_{17}\text{H}_{24}\text{BrNO}_2\text{Na}$  ( $\text{M} + \text{Na}$ ) 376.0888 (3.2 ppm). EA found C 57.83, 57.57, H 6.58, 6.96, N 3.94, 4.01, calculated for  $\text{C}_{17}\text{H}_{24}\text{BrNO}_2$ : C 57.63, H 6.83; N 3.95.

**2-Bromo-N-butyl-1-methyl-N-(4-(trifluoromethyl)benzyl)cyclopropane-1-carboxamide (8d).** This compound was synthesized according to Typical procedure I employing 2-bromo-1-methylcyclopropane-1-carbonyl chloride (1.00 g, 5.06 mmol), *N*-(4-(trifluoromethyl)benzyl)butan-1-amine (1.17 g, 5.06 mmol), and triethylamine (1.39 mL, 1.01 g, 10.0 mmol). The reaction mixture was stirred at room temperature overnight. The product was isolated by column chromatography eluting with a hexanes/EtOAc mixture (3:1) as a colorless oil ( $R_f$  0.34). Yield: 1.73 g (4.40 mmol, 87%).  $^1\text{H}$  NMR (500 MHz,  $\text{CDCl}_3$ )  $\delta$  [7.64 (d,  $J$  = 7.9 Hz), 7.54 (d,  $J$  = 7.9 Hz),  $\Sigma$ 2H], 7.39 (m, 2H), [5.11 (d,  $J$  = 17.3 Hz), 4.90 (d,  $J$  = 15.3 Hz), 4.56 (d,  $J$  = 17.4 Hz), 4.47 (d,  $J$  = 15.3 Hz),  $\Sigma$ 2H], [3.83 (ddd,  $J$  = 13.7, 10.2, 5.6 Hz), 3.60 (ddd,  $J$  = 14.3, 11.7, 4.9 Hz), 3.22 (ddd,  $J$  = 14.3, 11.5, 4.8 Hz), 3.02 (ddd,  $J$  = 15.6, 7.5, 4.7 Hz), 2.70 (ddd,  $J$  = 13.6, 10.1, 5.2 Hz),  $\Sigma$ 3H], [1.76 – 1.70 (m), 1.67 (t,  $J$  = 5.8 Hz), 1.63 – 1.44 (m), 1.42 (s), 1.36 – 1.28 (m), 1.26 (s), 1.25 – 1.17 (m),  $\Sigma$ 9H], [0.93 (t,  $J$  = 7.3 Hz), 0.86 (t,  $J$  = 7.3 Hz),  $\Sigma$ 3H];  $^{13}\text{C}$  NMR (126 MHz,  $\text{CDCl}_3$ )  $\delta$  (171.0, 170.8, 1C), (141.7, 141.3, 1C), [129.6 (q,  $^2J_{\text{CF}}$  = 32.6 Hz), 129.4 (q,  $^2J_{\text{CF}}$  = 32.4 Hz), 1C], (128.3, 127.1, 2C), [126.0 (q,  $^3J_{\text{CF}}$  = 3.8 Hz), 125.4 (q,  $^3J_{\text{CF}}$  = 3.8 Hz), 2C], [125.3 (q,  $^1J_{\text{CF}}$  = 272.5 Hz), 124.2 (q,  $^1J_{\text{CF}}$  = 271.4 Hz), 1C], (50.5, 47.7, 1C), (47.3, 45.7, 1C), (30.6, 28.6, 1C), (28.11, 28.05, 1C), (26.2, 26.0, 1C), (22.7, 22.6, 1C), (21.9, 21.8, 1C), 20.4 (1C), (13.98, 13.95, 1C);  $^{19}\text{F}$  NMR (376 MHz,  $\text{CDCl}_3$ )  $\delta$  -62.45, -62.51; FT IR (NaCl,  $\text{cm}^{-1}$ ): 2962, 2935, 2874, 1644, 1416, 1326, 1164, 1125, 1067, 1018, 824; HRMS (TOF ES): found 414.0636, calculated for  $\text{C}_{17}\text{H}_{21}\text{BrF}_3\text{NONa}$  ( $\text{M} + \text{Na}$ ) $^+$  414.0656 (4.8 ppm); EA found C 52.25, 51.88, H 5.64, 5.28, N 3.28, 3.70, calculated for  $\text{C}_{17}\text{H}_{21}\text{BrF}_3\text{NO}$ : C 52.05, H 5.40, N 3.57.

**2-Bromo-N,1-dimethyl-N-(4-nitrobenzyl)cyclopropane-1-carboxamide (8e).** This compound was synthesized according to Typical procedure I employing 2-bromo-1-methylcyclopropane-1-carbonyl chloride (494 mg, 2.50 mmol), *N*-methyl-1-(4-nitrophenyl)methanamine (415 mg, 2.50 mmol), and triethylamine (886  $\mu\text{L}$  642 mg, 6.35 mmol). The reaction mixture was stirred at room temperature overnight. The product was isolated by column chromatography eluting with a hexanes/EtOAc mixture (1:3) as a yellow oil ( $R_f$  0.38). Yield: 458 mg (1.40 mmol, 56%).  $^1\text{H}$  NMR (500 MHz,  $\text{CDCl}_3$ )  $\delta$  8.30 – 8.14 (m, 2H), [7.52 - 7.44 (m), 7.37 (d,  $J$  = 8.7 Hz),  $\Sigma$ 2H], [5.24 (d,  $J$  = 17.4 Hz), 4.93 (d,  $J$  = 14.7 Hz), 4.70 – 4.54 (m), 4.50 (d,  $J$  = 14.7 Hz),  $\Sigma$ 2H], [3.24 – 3.18 (m), 3.14 (s), 3.09 – 3.02 (m), 2.92 (s),  $\Sigma$ 4H], [1.78 (dd,  $J$  = 8.2, 6.8 Hz), 1.67 (dd,  $J$  = 6.8, 4.7 Hz),  $\Sigma$ 1H], [1.52 (s), 1.45 (s), 1.32 (s),  $\Sigma$ 3H], [1.25 (t,  $J$  = 7.2



Hz), 0.97 (t,  $J = 5.9$  Hz),  $\Sigma 1\text{H}$ ];  $^{13}\text{C}$  NMR (126 MHz,  $\text{CDCl}_3$ )  $\delta$  (172.2, 170.9, 1C), (147.4, 144.8, 1C), (128.9, 128.5, 2C), (127.4, 124.2, 1C), (124.1, 123.8, 2C), (51.1, 50.8, 1C), (35.5, 35.3, 1C), (27.7, 27.2, 1C), (26.0, 25.7, 1C), (22.4, 18.9, 1C), (21.8, 20.9, 1C); FT IR ( $\text{NaCl}$ ,  $\text{cm}^{-1}$ ): 2932, 2360, 1643, 1519, 1488, 1402, 1346, 1108, 935, 859, 737, 692. HRMS (TOF ES): found 349.0174, calculated for  $\text{C}_{13}\text{H}_{15}\text{BrN}_2\text{O}_3\text{Na}$  ( $\text{M} + \text{Na}$ ) 349.0164 (1.0 ppm); EA found C 47.43, 47.81, H 4.58, 4.90, N 8.57, 8.72, calculated for  $\text{C}_{13}\text{H}_{15}\text{BrN}_2\text{O}_3$ : C 47.72, H 4.62, N 8.56.

***N*-Benzyl-2-bromo-*N*-butyl-1-methylcyclopropane-1-carboxamide (8f).** This compound was synthesized according to Typical procedure I employing 2-bromo-1-methylcyclopropane-1-carbonyl chloride (634 mg, 3.21 mmol), *N*-benzylbutyl-1-amine (524 mg, 3.21 mmol), and triethylamine (1.40 mL, 1.02 g, 10.5 mmol). The reaction mixture was stirred at room temperature overnight. After standard aqueous workup and extraction, the material was filtered through a silica plug to give a colorless oil, yield 895 mg (2.76 mmol, 86%). This material had purity by GC c.a. 95% and could be used in the cyclization step as is without additional purification. If desired, it can be additionally purified by preparative column chromatography on Silica gel eluting with a  $\text{CH}_2\text{Cl}_2/\text{EtOAc}$  mixture (40:1) to isolated inseparable mixture of diastereomeric bromocyclopropanes **8f** as colorless oil,  $R_f$  0.45 ( $\text{CH}_2\text{Cl}_2/\text{EtOAc}$  40:1).  $^1\text{H}$  NMR (500 MHz,  $\text{CDCl}_3$ )  $\delta$  7.40 – 7.22 (m, 4H), 7.16 (d,  $J = 7.2$  Hz, 1H), [5.08 (d,  $J = 16.9$  Hz), 4.88 (d,  $J = 14.9$  Hz), 4.68 (br. m), 4.53 – 4.42 (m),  $\Sigma 2\text{H}$ ], [3.81 (dddd,  $J = 13.3, 10.1, 5.5, 1.5$  Hz), 3.54 (ddd,  $J = 14.2, 11.8, 4.9$  Hz), 3.36 – 3.14 (m), 3.04 – 2.97 (m), 2.75 (ddd,  $J = 13.4, 10.1, 5.4$  Hz),  $\Sigma 3\text{H}$ ], [1.80 – 1.71 (m), 1.70 – 1.65 (m), 1.63 – 1.52 (m), 1.52 – 1.43 (br.m), 1.36 – 1.16 (m),  $\Sigma 6\text{H}$ ], [1.42 (s), 1.30 (s),  $\Sigma 3\text{H}$ ], [0.92 (t,  $J = 7.3$  Hz), 0.86 (t,  $J = 7.4$  Hz),  $\Sigma 3\text{H}$ ];  $^{13}\text{C}$  NMR (126 MHz,  $\text{CDCl}_3$ )  $\delta$  (172.2, 170.7, 1C), (137.5, 137.4, 137.0, 136.7, 1C), (129.0, 128.9, 128.8, 128.5, 2C), (128.3, 127.9, 127.7, 127.6, 1C), (127.5, 127.3, 126.8, 126.7, 2C), (50.8, 50.6, 47.7, 47.2, 1C), (46.7, 46.4, 45.5, 44.8, 1C), (30.5, 30.2, 29.0, 28.7, 1C), (28.2, 28.1, 1C), (27.7, 27.5, 26.3, 26.2, 26.1, 1C), (22.7, 22.6, 21.8, 1C), (22.0, 22.0, 20.0, 19.8, 1C), (20.4, 20.3, 1C), (14.0, 14.0, 1C); HRMS (TOF ES): found 346.0797, calculated for  $\text{C}_{16}\text{H}_{22}\text{BrNONa}$  ( $\text{M} + \text{Na}$ ) 346.0782 (4.3 ppm). EA found C 59.34, 59.19, H 6.68, 6.91, N 4.14, 4.43, calculated for  $\text{C}_{16}\text{H}_{22}\text{BrNO}$ : C 59.27, H 6.84; N 4.32.

***N*-Benzyl-2-bromo-*N*-isopropyl-1-methylcyclopropane-1-carboxamide (8g).** This compound was synthesized according to Typical procedure I employing 2-bromo-1-methylcyclopropane-1-carbonyl chloride (667 mg, 3.38 mmol), *N*-benzylpropan-2-amine (504 mg, 3.38 mmol), and triethylamine (1.40 mL, 1.02 g, 10.5 mmol). The reaction mixture was stirred at room temperature overnight. After standard aqueous workup and extraction, the material was filtered through a silica plug to give a yellow oil, yield 860 mg (2.77 mmol, 82%). This material had purity by GC c.a. 98% and could be used in the cyclization step as is without additional purification. If desired, it can be additionally purified by preparative column chromatography on Silica gel eluting with a  $\text{CH}_2\text{Cl}_2/\text{EtOAc}$  mixture (20:1) to isolated inseparable mixture of diastereomeric bromocyclopropanes **8g** as colorless oils,  $R_f$  0.42 ( $\text{CH}_2\text{Cl}_2/\text{EtOAc}$  20:1). It should be pointed out, that one of the diastereomers shows in NMR spectra two sets of signals due to restricted rotation.  $^1\text{H}$  NMR (400 MHz,  $\text{CDCl}_3$ )  $\delta$  7.41 –

7.10 (m, 5H), [5.09 (d,  $J = 17.4$  Hz), 4.63 – 4.32 (m), 3.93 (sept,  $J = 6.7$  Hz),  $\Sigma 3$ H], [3.25 (br.dd,  $J = 8.3, 5.0$  Hz), 3.07 (dd,  $J = 7.6, 4.8$  Hz), 2.98 (dd,  $J = 7.5, 4.7$  Hz),  $\Sigma 1$ H], [1.77 (t,  $J = 7.5$  Hz), 1.71 (dd,  $J = 6.5, 5.0$  Hz),  $\Sigma 1$ H], [1.68 (s), 1.54 (br.s), 1.45 (s), 1.40 (s),  $\Sigma 3$ H], [1.38 – 1.24 (m), 1.25 – 1.11 (m), 1.25 – 1.11 (m), 0.96 – 0.90 (m),  $\Sigma 7$ H].  $^{13}\text{C}$  NMR (126 MHz,  $\text{CDCl}_3$ )  $\delta$  (172.1, 171.3, 170.5, 1C), (139.6, 139.3, 138.5, 1C), (128.7, 128.5, 128.3, 2C), (127.4, 126.8, 1C), (127.1, 126.8, 126.6, 2C), (50.4, 49.0, 48.9, 1C), (50.3, 44.7, 44.0, 1C), (29.0, 28.6, 1C), (27.4, 26.4, 26.1, 1C), (23.3, 22.8, 21.8, 1C), (22.9, 22.3, 1C), (22.2, 22.1, 21.4, 1C), (20.2, 19.9, 19.7, 1C); HRMS (TOF ES): found 332.0638, calculated for  $\text{C}_{15}\text{H}_{20}\text{BrNONa}$  ( $\text{M} + \text{Na}$ ) 332.0626 (3.6 ppm). EA found C 58.30, 58.03, H 6.63, 6.54, N 4.28, 4.60, calculated for  $\text{C}_{15}\text{H}_{20}\text{BrNO}$ : C 58.07, H 6.50; N 4.51.

***N*-Benzyl-2-bromo-*N*-cyclohexyl-1-methylcyclopropane-1-carboxamide (8h)**. This compound was synthesized according to Typical procedure I employing 2-bromo-1-methylcyclopropane-1-carbonyl chloride (592 mg, 3.00 mmol), *N*-benzylcyclohexylamine (568 mg, 3.0 mmol), and triethylamine (1.40 mL, 1.02 g, 10.5 mmol). The reaction mixture was stirred at room temperature overnight. After standard aqueous workup and extraction, the material was filtered through a silica plug to give a pale-yellow oil, yield 893 mg (2.55 mmol, 85%). This material had purity by GC c.a. 96% and could be used in the cyclization step as is without additional purification. If desired, it can be additionally purified by preparative column chromatography on Silica gel eluting with a  $\text{CH}_2\text{Cl}_2/\text{EtOAc}$  mixture (40:1) to isolated inseparable mixture of diastereomeric bromocyclopropanes **8h** as colorless oils,  $R_f$  0.40 ( $\text{CH}_2\text{Cl}_2/\text{EtOAc}$  40:1). It should be pointed out, that one of the diastereomers shows in NMR spectra two sets of signals due to restricted rotation.  $^1\text{H}$  NMR (400 MHz,  $\text{CDCl}_3$ )  $\delta$  7.40 – 7.12 (m, 5H), [5.09 (d,  $J = 17.6$  Hz), 4.61 (s), 4.57 (s), 4.44 (d,  $J = 17.6$  Hz), 4.36 (d,  $J = 15.6$  Hz),  $\Sigma 2$ H], [3.95 (tt,  $J = 11.4, 3.1$  Hz), 3.88 – 3.76 (m),  $\Sigma 1$ H], [3.23 (dd,  $J = 8.1, 4.9$  Hz), 3.08 (dd,  $J = 7.6, 4.8$  Hz), 2.96 (dd,  $J = 7.5, 4.6$  Hz),  $\Sigma 1$ H], [2.02 (br.d,  $J = 11.8$  Hz), 1.89 – 1.75 (m), 1.74 – 1.62 (m), 1.62 – 1.29 (m), 1.26 – 1.20 (m), 1.17 – 0.90 (m),  $\Sigma 12$ H], [1.43 (s), 1.27 (s)  $\Sigma 3$ H];  $^{13}\text{C}$  NMR (126 MHz,  $\text{CDCl}_3$ )  $\delta$  (172.2, 171.3, 170.6, 1C), (139.6, 139.3, 138.9, 1C), (128.6, 128.4, 128.3, 2C), (127.3, 126.8, 1C), (127.2, 126.7, 126.6, 2C), (58.2, 58.2, 57.8, 1C), (49.7, 45.8, 45.1, 1C), (33.5, 32.5, 30.4, 1C), (32.8, 32.2, 30.0, 1C), (28.9, 28.7, 1C), (27.6, 26.3, 26.2, 1C), (26.3, 26.2, 26.2, 26.1, 26.1, 2C), (25.7, 25.5, 25.5, 1C), (23.5, 23.1, 21.6, 1C), (22.3, 22.2, 20.0, 1C); HRMS (TOF ES): found 372.0947, calculated for  $\text{C}_{18}\text{H}_{24}\text{BrNONa}$  ( $\text{M} + \text{Na}$ ) 372.0939 (2.1 ppm). EA found C 61.53, 61.91, H 7.03, 7.11, N 4.09, 4.15, calculated for  $\text{C}_{18}\text{H}_{24}\text{BrNO}$ : C 61.72, H 6.91; N 4.00.

***N*-Benzyl-2-bromo-*N*-(*tert*-butyl)-1-methylcyclopropane-1-carboxamide (8i)**. This compound was synthesized according to Typical procedure I employing 2-bromo-1-methylcyclopropane-1-carbonyl chloride (640 mg, 3.24 mmol), *N*-benzyl-2-methylpropan-2-amine (529 mg, 3.24 mmol), and triethylamine (1.40 mL, 1.02 g, 10.5 mmol). The reaction mixture was stirred at room temperature overnight. After standard aqueous workup and extraction, the material was filtered through a silica plug to afford a pale-yellow glass, yield 830 mg (2.56 mmol, 79%). This material had purity by GC c.a. 98% and could be used in the cyclization step as is without

additional purification. If desired, diastereomeric bromocyclopropanes can be additionally purified and separated by preparative column chromatography on Silica gel eluting with a CH<sub>2</sub>Cl<sub>2</sub>/EtOAc mixture (40:1). HRMS (TOF ES): found 346.0786, calculated for C<sub>16</sub>H<sub>22</sub>BrNONa (M + Na) 346.0782 (1.2 ppm). Individual isomers were isolated as colorless glass (*trans*-**8i**) and colorless crystalline solid (*cis*-**8i**), respectively. **trans**-**8i**: R<sub>f</sub> 0.42 (CH<sub>2</sub>Cl<sub>2</sub>/EtOAc 40:1); <sup>1</sup>H NMR (500 MHz, CDCl<sub>3</sub>) δ 7.34 (t, *J* = 7.5 Hz, 2H), 7.25 (t, *J* = 7.3 Hz, 1H), 7.19 (d, *J* = 7.5 Hz, 2H), 4.78 (q, *J* = 17.8 Hz, 2H), 3.20 (dd, *J* = 8.2, 4.9 Hz, 1H), 1.71 (dd, *J* = 8.2, 6.7 Hz, 1H), 1.42 (s, 3H), 1.36 (s, 9H), 0.82 (dd, *J* = 6.7, 5.0 Hz, 1H); <sup>13</sup>C NMR (126 MHz, CDCl<sub>3</sub>) δ 173.5, 140.0, 128.8 (2C), 127.1, 125.9 (2C), 58.3, 49.5, 28.6 (3C), 28.5, 27.9, 22.2, 20.3. **cis**-**8i**: mp 165.2-166.1 °C; R<sub>f</sub> 0.35 (CH<sub>2</sub>Cl<sub>2</sub>/EtOAc 40:1); <sup>1</sup>H NMR (400 MHz, CDCl<sub>3</sub>) δ 7.49 – 7.10 (m, 5H), 5.10 (d, *J* = 18.3 Hz, 1H), 4.61 (d, *J* = 18.3 Hz, 1H), 2.95 (dd, *J* = 7.5, 4.6 Hz, 1H), 1.67 (dd, *J* = 6.7, 4.6 Hz, 1H), 1.39 (s, 9H), 1.22 (s, 3H), 1.12 (dd, *J* = 7.5, 6.7 Hz, 1H); <sup>13</sup>C NMR (126 MHz, CDCl<sub>3</sub>) δ 171.7, 140.8, 128.6 (2C), 126.9, 126.1 (2C), 59.0, 49.9, 30.4, 28.6 (3C), 26.9, 23.8, 22.4. EA found C 59.50, 59.03, H 7.01, 6.94, N 4.52, 4.19, calculated for C<sub>16</sub>H<sub>22</sub>BrNO: C 59.27, H 6.84; N 4.32.

**2-Bromo-N-(4-fluorobenzyl)-N,1-dimethylcyclopropane-1-carboxamide (8j).**

This compound was synthesized according to Typical procedure I employing 2-bromo-1-methylcyclopropane-1-carbonyl chloride (340 mg, 1.72 mmol), 1-(4-fluorophenyl)-*N*-methylmethanamine (239 mg, 1.72 mmol), and triethylamine (988 μL 717 mg, 7.08 mmol). The reaction mixture was stirred at room temperature overnight. The product was isolated by column chromatography eluting with a hexanes/EtOAc mixture (1:1) as a yellow oil (R<sub>f</sub> 0.37). Yield: 413 mg (1.37 mmol, 80%). <sup>1</sup>H NMR (500 MHz, CDCl<sub>3</sub>) δ [7.31 – 7.27 (m), 7.27 – 7.94 (m), Σ4H], 5.14 – 4.36 (m, 2H), [3.20 (dd, *J* = 8.2, 4.9 Hz), 3.10 – 2.85 (m), Σ4H], [1.82 – 1.73 (m), 1.69 – 1.63 (m), Σ1H], [1.49 (s), 1.42 (s), 1.35 (s), Σ3H], [1.22 (t, *J* = 7.1 Hz), 0.94 (dd, *J* = 6.7, 4.9 Hz), Σ1H]; <sup>13</sup>C NMR (126 MHz, CDCl<sub>3</sub>) δ (171.2, 170.5, 1C), [162.23 (d, <sup>1</sup>J<sub>CF</sub> = 246.1 Hz), 162.19 (d, <sup>1</sup>J<sub>CF</sub> = 246.0 Hz), 1C], [132.9 (d, <sup>4</sup>J<sub>CF</sub> = 3.5 Hz), 132.7 (br. s), 1C], [130.0 (d, <sup>3</sup>J<sub>CF</sub> = 8.2 Hz), 128.3 (d, <sup>3</sup>J<sub>CF</sub> = 7.9 Hz), 2C], [115.8 (d, <sup>2</sup>J<sub>CF</sub> = 23.5 Hz), 115.3 (d, <sup>2</sup>J<sub>CF</sub> = 21.7 Hz), 2C], (52.7, 50.7, 1C), (35.0, 33.5, 1C), (27.8, 25.8, 1C), [27.5 (br), 26.0, 1C], (25.8, 20.9, 1C), [21.8, 18.9 (br), 1C]; <sup>19</sup>F NMR (376 MHz, CDCl<sub>3</sub>) δ -114.9, -115.3; FT IR (NaCl, cm<sup>-1</sup>): 2930, 2360, 2342, 1700, 1684, 1645, 1540, 1508, 1403, 1222, 1106, 924, 817, 668, 650; HRMS (TOF ES): found 322.0217, calculated for C<sub>13</sub>H<sub>15</sub>BrFNONa (M + Na) 322.0219 (0.6 ppm); EA found C 51.98, 52.10, H 5.24, 4.82, N 4.95, 4.69, calculated for C<sub>13</sub>H<sub>15</sub>BrFNO: C 52.02, H 5.04, N 4.67.

**2-Bromo-N-(2,4-difluorobenzyl)-N,1-dimethylcyclopropane-1-carboxamide (8k).**

This compound was synthesized according to Typical procedure I employing 2-bromo-1-methylcyclopropane-1-carbonyl chloride (20) (400 mg, 2.03 mmol), 1-(2,4-difluorophenyl)-*N*-methylmethanamine (319 mg, 2.03 mmol), and triethylamine (710 μL, 515 mg, 5.09 mmol). The reaction mixture was stirred at room temperature overnight. The product was isolated by column chromatography eluting with a CH<sub>2</sub>Cl<sub>2</sub>/MeOH mixture (40:1) as a pale-yellow oil (R<sub>f</sub> 0.43). Yield: 490 mg (1.54 mmol, 76%). <sup>1</sup>H NMR (500 MHz, CDCl<sub>3</sub>) δ [7.44 – 7.39 (m), 7.36 (s), 7.27 –

7.17 (m),  $\Sigma$ 1 H], 6.95 – 6.75 (m, 2H), 5.08 – 4.45 (m, 2H), 3.23 – 2.83 (m, 4H), [1.75 (dd,  $J = 8.2, 6.6$  Hz), 1.69 – 1.61 (m),  $\Sigma$ 1H], [1.48 (s), 1.41 (s), 1.32 (s),  $\Sigma$ 3 H], [1.21 (t,  $J = 7.2$  Hz), 0.93 (dd,  $J = 6.7, 4.9$  Hz),  $\Sigma$ 1 H];  $^{13}\text{C}$  NMR (126 MHz,  $\text{CDCl}_3$ )  $\delta$  (172.0, 170.7, 1C), [162.4 (dd,  $^1J_{\text{CF}} = 249.0$  Hz,  $^3J_{\text{CF}} = 11.8$  Hz), 162.2 (dd,  $^1J_{\text{CF}} = 247.6$  Hz,  $^3J_{\text{CF}} = 11.9$  Hz), 1C), [161.1 (dd,  $^1J_{\text{CF}} = 248.2$  Hz,  $^3J_{\text{CF}} = 11.9$  Hz), 1C], [131.8 (dd,  $^3J_{\text{CF}} = 9.5$  Hz,  $^3J_{\text{CF}} = 5.7$  Hz), 131.4 (br. s), 1C], [120.0 (dd,  $^2J_{\text{CF}} = 15.0$  Hz,  $^4J_{\text{CF}} = 3.9$  Hz), 119.9 (br. s), 1C], [111.7 (dd,  $^2J_{\text{CF}} = 21.2$  Hz,  $^4J_{\text{CF}} = 3.9$  Hz), 111.5 (dd,  $^2J_{\text{CF}} = 20.8$  Hz,  $^4J_{\text{CF}} = 3.7$  Hz), 1C], [104.3 (t,  $^2J_{\text{CF}} = 25.2$  Hz,  $^4J_{\text{CF}} = 3.9$  Hz), 103.5 (t,  $^2J_{\text{CF}} = 25.5$  Hz), 1C], [46.8 (d,  $^3J_{\text{CF}} = 4.8$  Hz), 44.2 (t,  $^3J_{\text{CF}} = 3.6$  Hz), 1C], (35.4, 35.1, 1C), (27.8, 27.4 (br), 1C), (25.9, 25.8, 1C), (21.80, 21.77, 1C), (20.9, 18.9, 1C);  $^{19}\text{F}$  NMR (376 MHz, Chloroform- $d$ )  $\delta$  -111.0 (d,  $^4J_{\text{FF}} = 7.3$  Hz), -111.1 (d,  $^4J_{\text{FF}} = 7.4$  Hz), -114.0 (d,  $^4J_{\text{FF}} = 7.2$  Hz), -115.1 (d,  $^4J_{\text{FF}} = 7.4$  Hz). FT IR (NaCl,  $\text{cm}^{-1}$ ): 2933, 2360, 2341, 1645, 1505, 1487, 1430, 1403, 1269, 1139, 1106, 1091, 964, 850, 668, 621. HRMS (TOF ES): found 318.0309, calculated for  $\text{C}_{13}\text{H}_{15}\text{BrF}_2\text{NO}$  ( $\text{M} + \text{H}$ ) 318.0305 (1.3 ppm); EA found C 48.81, 49.33, H 4.64, 4.20, N 4.28, 4.32, calculated for  $\text{C}_{13}\text{H}_{14}\text{BrF}_2\text{NO}$ : C 49.08, H 4.44, N 4.40.

**2-Bromo-N-(2-chlorobenzyl)-N,1-dimethylcyclopropane-1-carboxamide (8l).**

This compound was synthesized according to Typical procedure I employing 2-bromo-1-methylcyclopropane-1-carbonyl chloride (494 mg, 2.50 mmol), 1-(2-chlorophenyl)-*N*-methylmethanamine (389 mg, 2.50 mmol), and triethylamine (886  $\mu\text{L}$  642 mg, 6.35 mmol). The reaction mixture was stirred at room temperature overnight. The product was isolated by column chromatography eluting with a hexanes/EtOAc mixture (3:2) as a colorless glass ( $R_f$  0.33). Yield: 586 mg (1.85 mmol, 74%).  $^1\text{H}$  NMR (500 MHz,  $\text{CDCl}_3$ )  $\delta$  [7.45 – 7.28 (m), 7.24 – 7.19 (m), 7.12 (br. s),  $\Sigma$ 4H], 5.12 – 4.52 (m, 2H), 3.26 – 2.88 (m, 4H), [1.77 (br. s), 1.69 – 1.65 (m), 1.52 (bs), 1.45 (s), 1.26 – 1.16 (m), 0.94 (br. s),  $\Sigma$ 5H];  $^{13}\text{C}$  NMR (126 MHz,  $\text{CDCl}_3$ )  $\delta$  (171.6, 170.7, 1C), (134.4, 134.2, 1C), (133.7, 132.8, 1C), (129.5, 128.8, 128.60, 128.56, 127.23, 127.18, 127.1, 127.0, 4C), (51.3, 48.7, 1C), (35.5, 34.5, 1C), (28.0, 26.0, 1C), (25.9, 25.6, 1C), (22.5, 21.8, 21.5, 21.0, 2C); FTIR (NaCl,  $\text{cm}^{-1}$ ): 2932, 1644, 1486, 1443, 1402, 1093, 1050, 752; HRMS (TOF ES): found 322.0196, calculated for  $\text{C}_{13}\text{H}_{15}\text{BrClNO}$  ( $\text{M} + \text{Li}$ ) 322.0186 (3.1 ppm); EA found C 49.55, 49.04, H 4.64, 5.05, N 4.57, 4.30, calculated for  $\text{C}_{13}\text{H}_{15}\text{BrClNO}$ : C 49.32, H 4.78, N 4.42.

**2-Bromo-N-(4-bromo-2-fluorobenzyl)-N,1-dimethylcyclopropane-1-carboxamide (8m).**

This compound was synthesized according to Typical procedure I employing 2-bromo-1-methylcyclopropane-1-carbonyl chloride (**20**) (494 mg, 2.50 mmol), 1-(4-bromo-2-fluorophenyl)-*N*-methylmethanamine (545 mg, 2.50 mmol), and triethylamine (886  $\mu\text{L}$  642 mg, 6.35 mmol). The reaction mixture was stirred at room temperature overnight. The product was isolated by column chromatography eluting with a hexanes/EtOAc mixture (3:2) as a pale-yellow oil ( $R_f$  0.23). Yield: 853 mg (2.25 mmol, 90%).  $^1\text{H}$  NMR (500 MHz,  $\text{CDCl}_3$ )  $\delta$  [7.36 – 7.27 (m), 7.28 – 7.08 (m),  $\Sigma$ 3H], 5.05 – 4.47 (m, 2H), 3.21 – 2.86 (m, 4H), [1.75 (dd,  $J = 8.2, 6.7$  Hz), 1.64 (dd,  $J = 6.9, 4.7$  Hz),  $\Sigma$ 1H], [1.48 (s), 1.41 (s), 1.30 (s),  $\Sigma$ 3H], [1.21 (t,  $J = 7.1$  Hz), 0.93 (dd,  $J = 6.7, 4.9$  Hz),  $\Sigma$ 1H];  $^{13}\text{C}$  NMR (126 MHz,  $\text{CDCl}_3$ )  $\delta$  [172.0, 170.8, 1C], 160.8 (d,  $^1J_{\text{CF}} = 250.8$  Hz, 1C), [131.9 (d,  $^3J_{\text{CF}} = 4.6$  Hz), 131.5 (br. s), 1C], [127.9 (d,  $^4J_{\text{CF}} = 3.4$  Hz),

127.7 (d,  $^4J_{\text{CF}} = 3.6$  Hz), 1C], [123.3 (d,  $^2J_{\text{CF}} = 15.2$  Hz), 123.1 (br. s), 1C], [121.7 (br. s), 121.4 (d,  $^3J_{\text{CF}} = 9.2$  Hz), 1C], [119.2 (br. s), 118.8 (d,  $^2J_{\text{CF}} = 22.4$  Hz), 1C], [47.0 (br. s), 44.3 (d,  $^3J_{\text{CF}} = 3.7$  Hz), 1C], (35.5, 35.2, 1C), (27.8, 27.3, 1C), (25.9, 25.8, 1C), (21.79, 21.76, 1C), (20.9, 18.9, 1C);  $^{19}\text{F}$  NMR (376 MHz,  $\text{CDCl}_3$ )  $\delta$  -115.3, -116.4; FT IR ( $\text{NaCl}$ ,  $\text{cm}^{-1}$ ): 2932, 1644, 1605, 1484, 1401, 1218, 1103, 875, 814, 611; HRMS (TOF ES): found 399.9341, calculated for  $\text{C}_{13}\text{H}_{14}\text{Br}_2\text{FNONa}$  ( $\text{M} + \text{Na}$ ) 399.9324 (4.3 ppm); EA found C 41.48, 41.39, H 3.52, 3.61, N 3.56, 3.76, calculated for  $\text{C}_{13}\text{H}_{14}\text{Br}_2\text{FNO}$ : C 41.19, H 3.72, N 3.70.

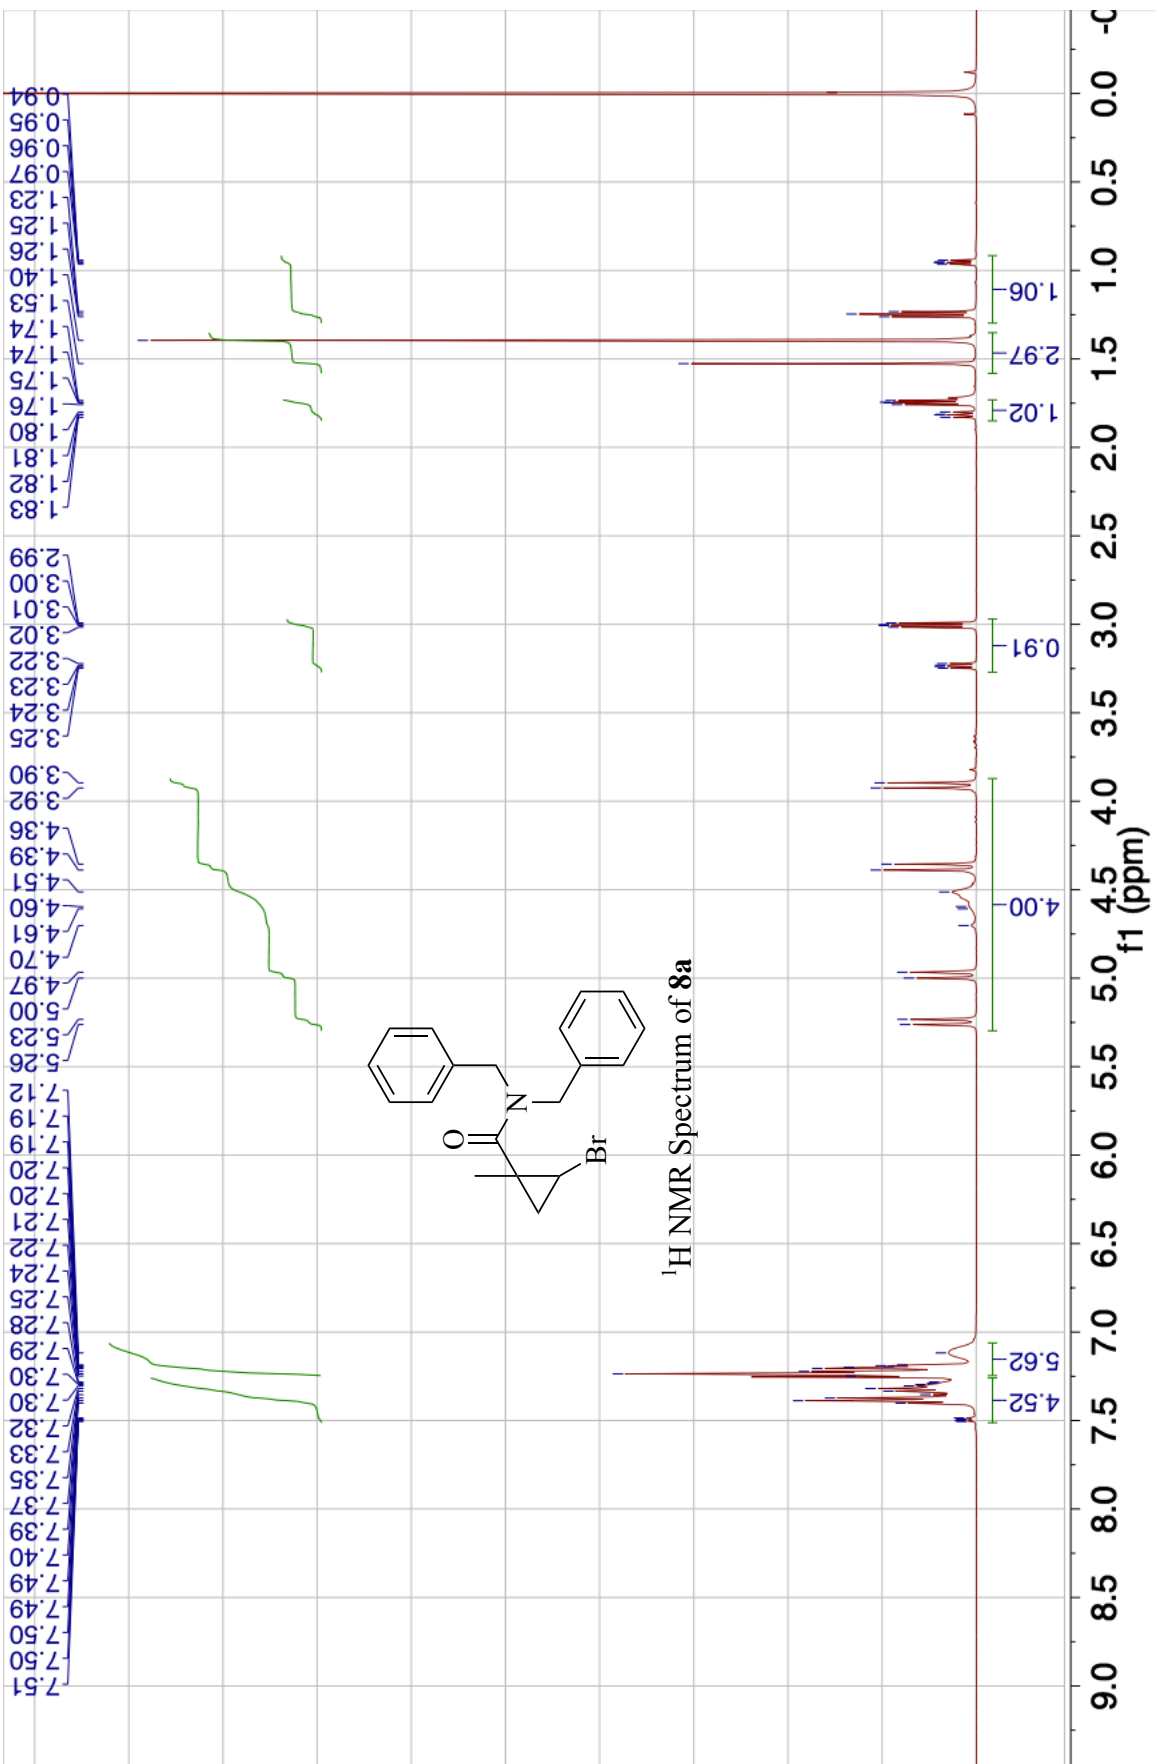

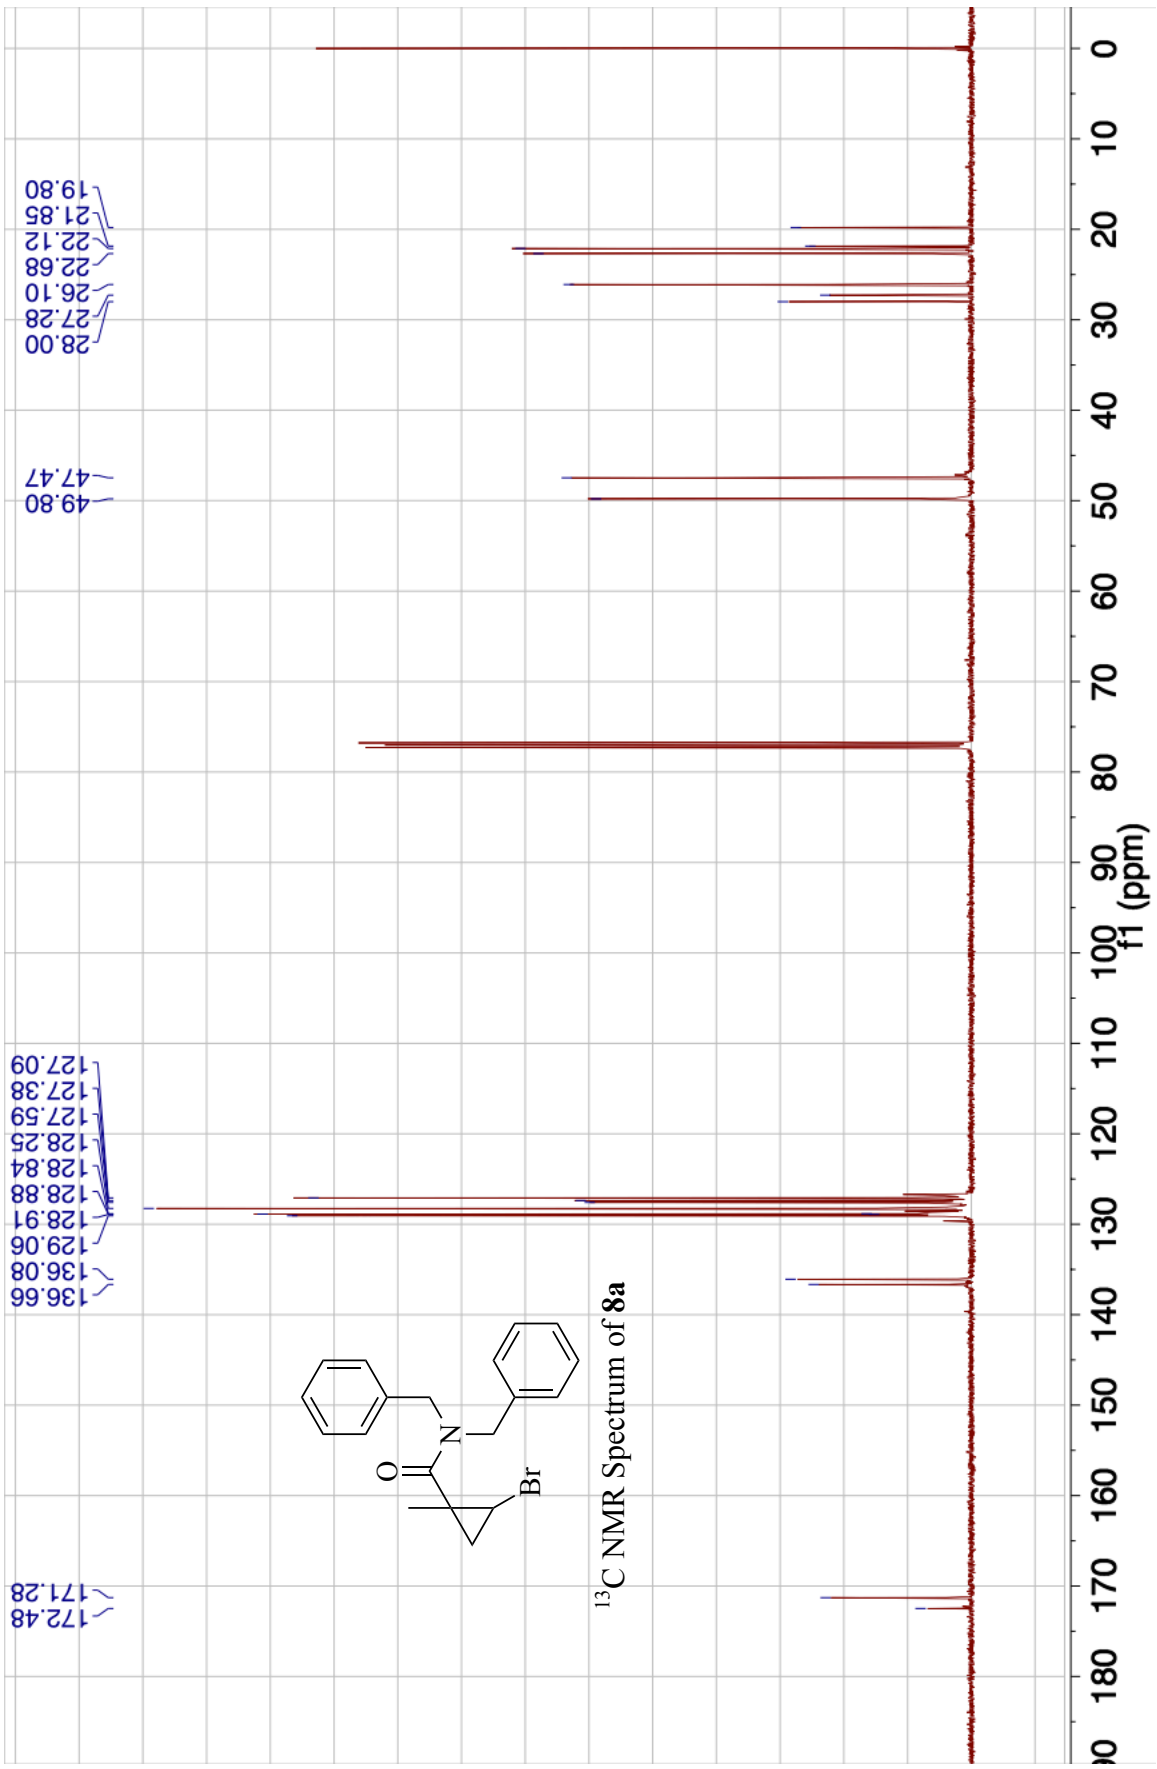

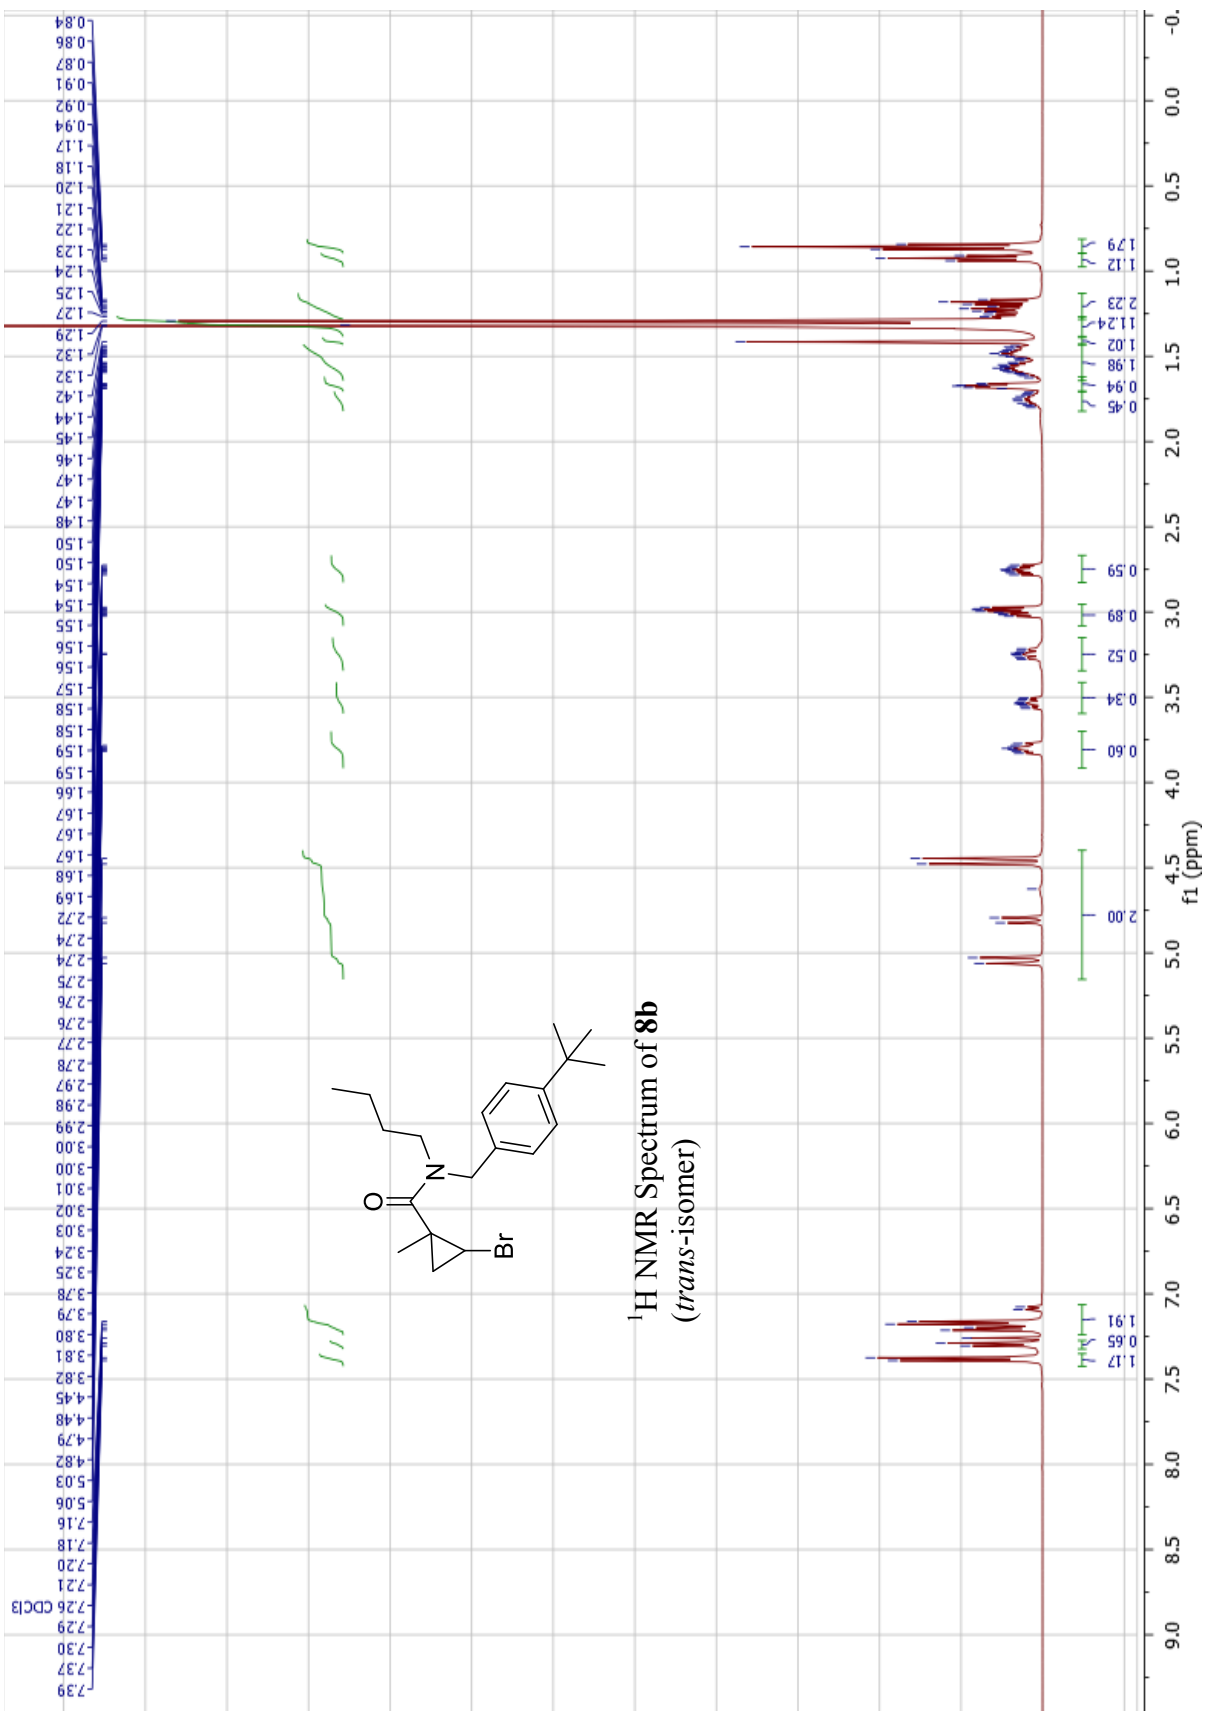



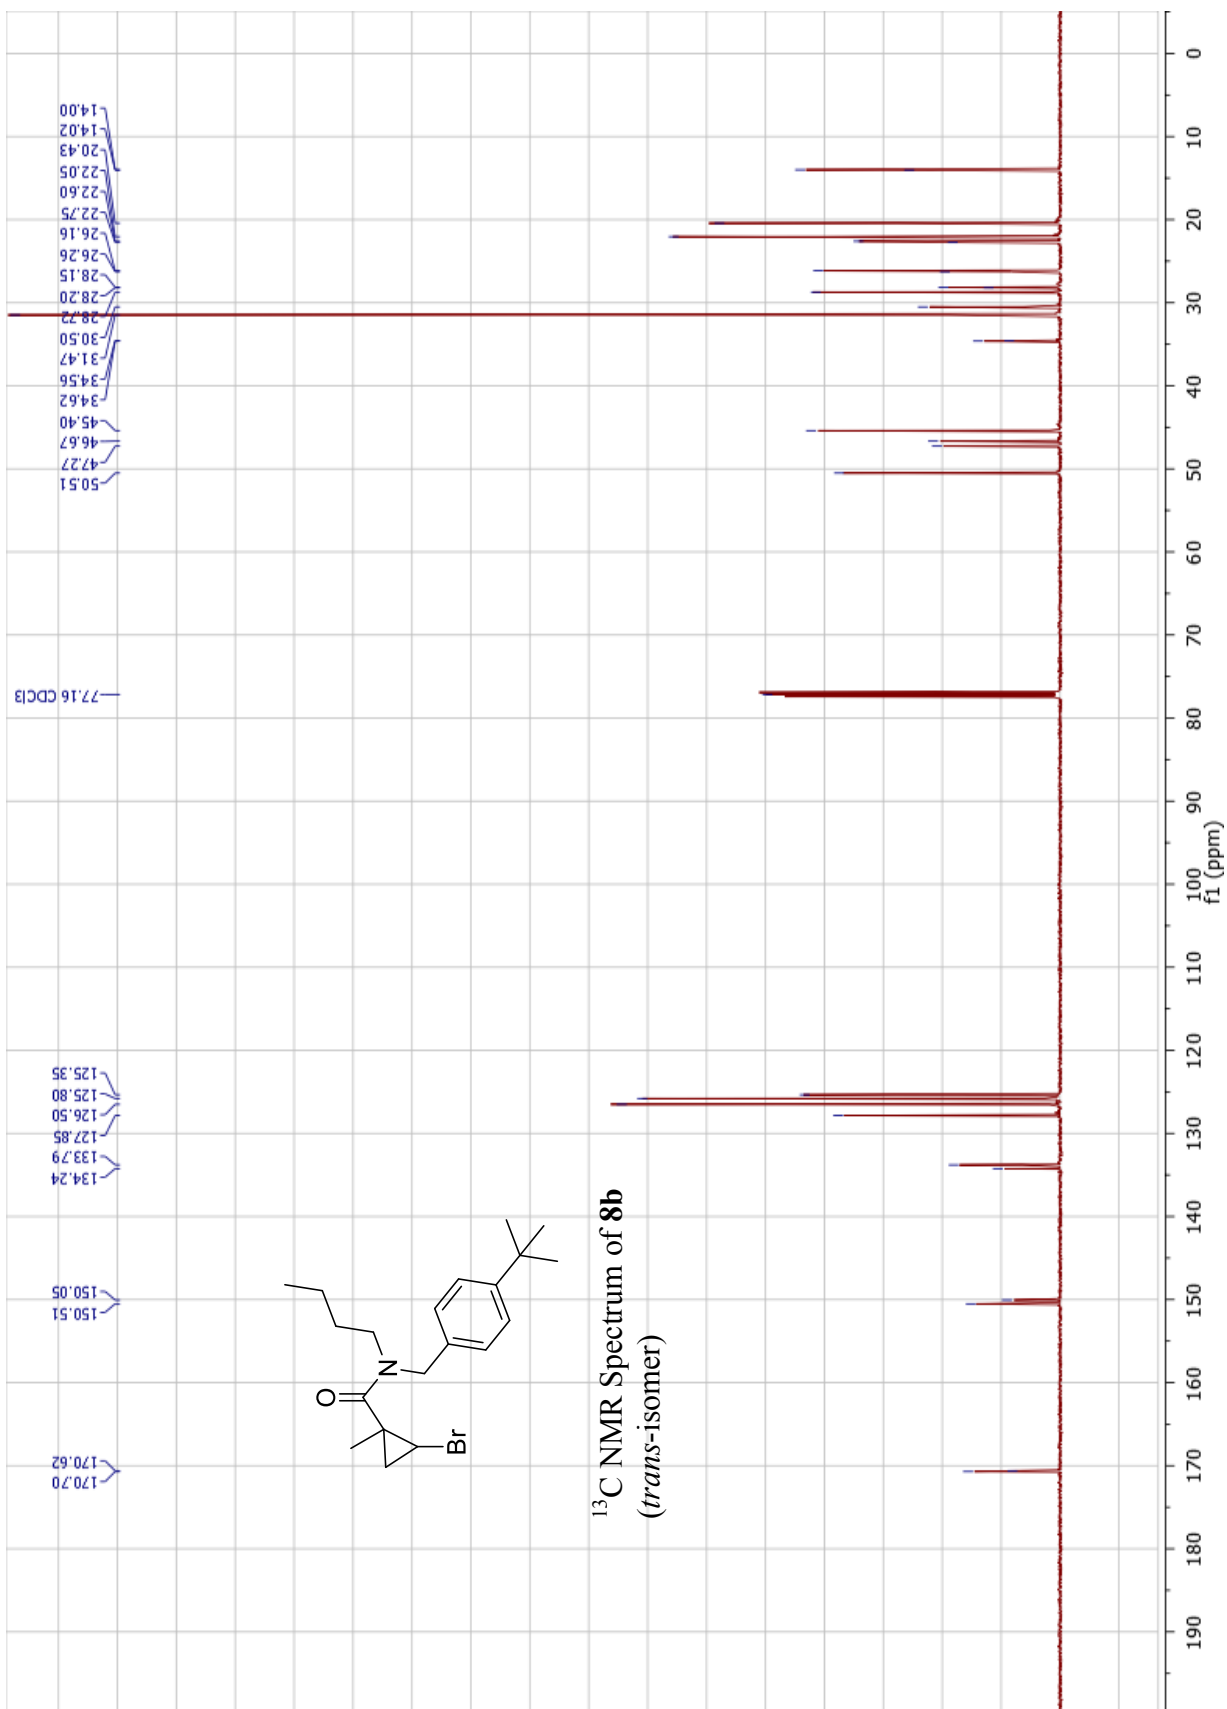

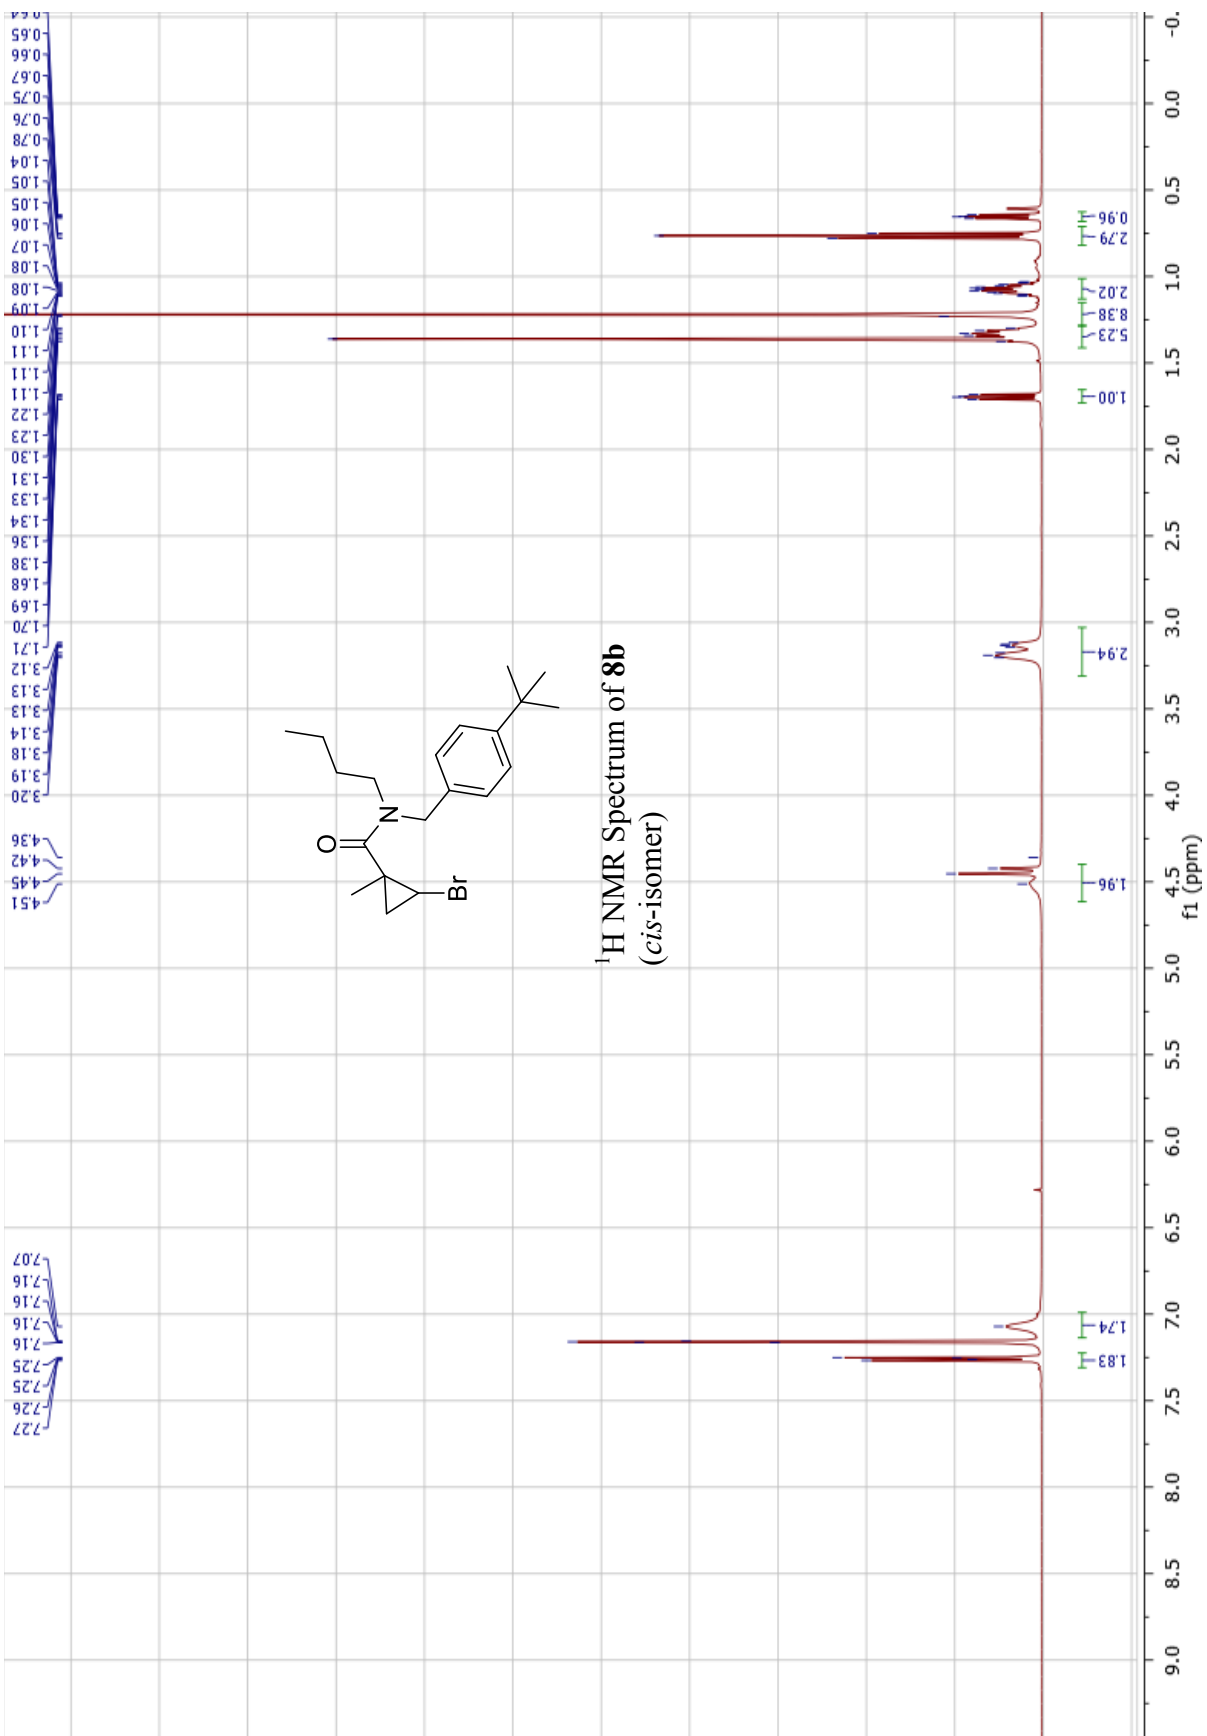

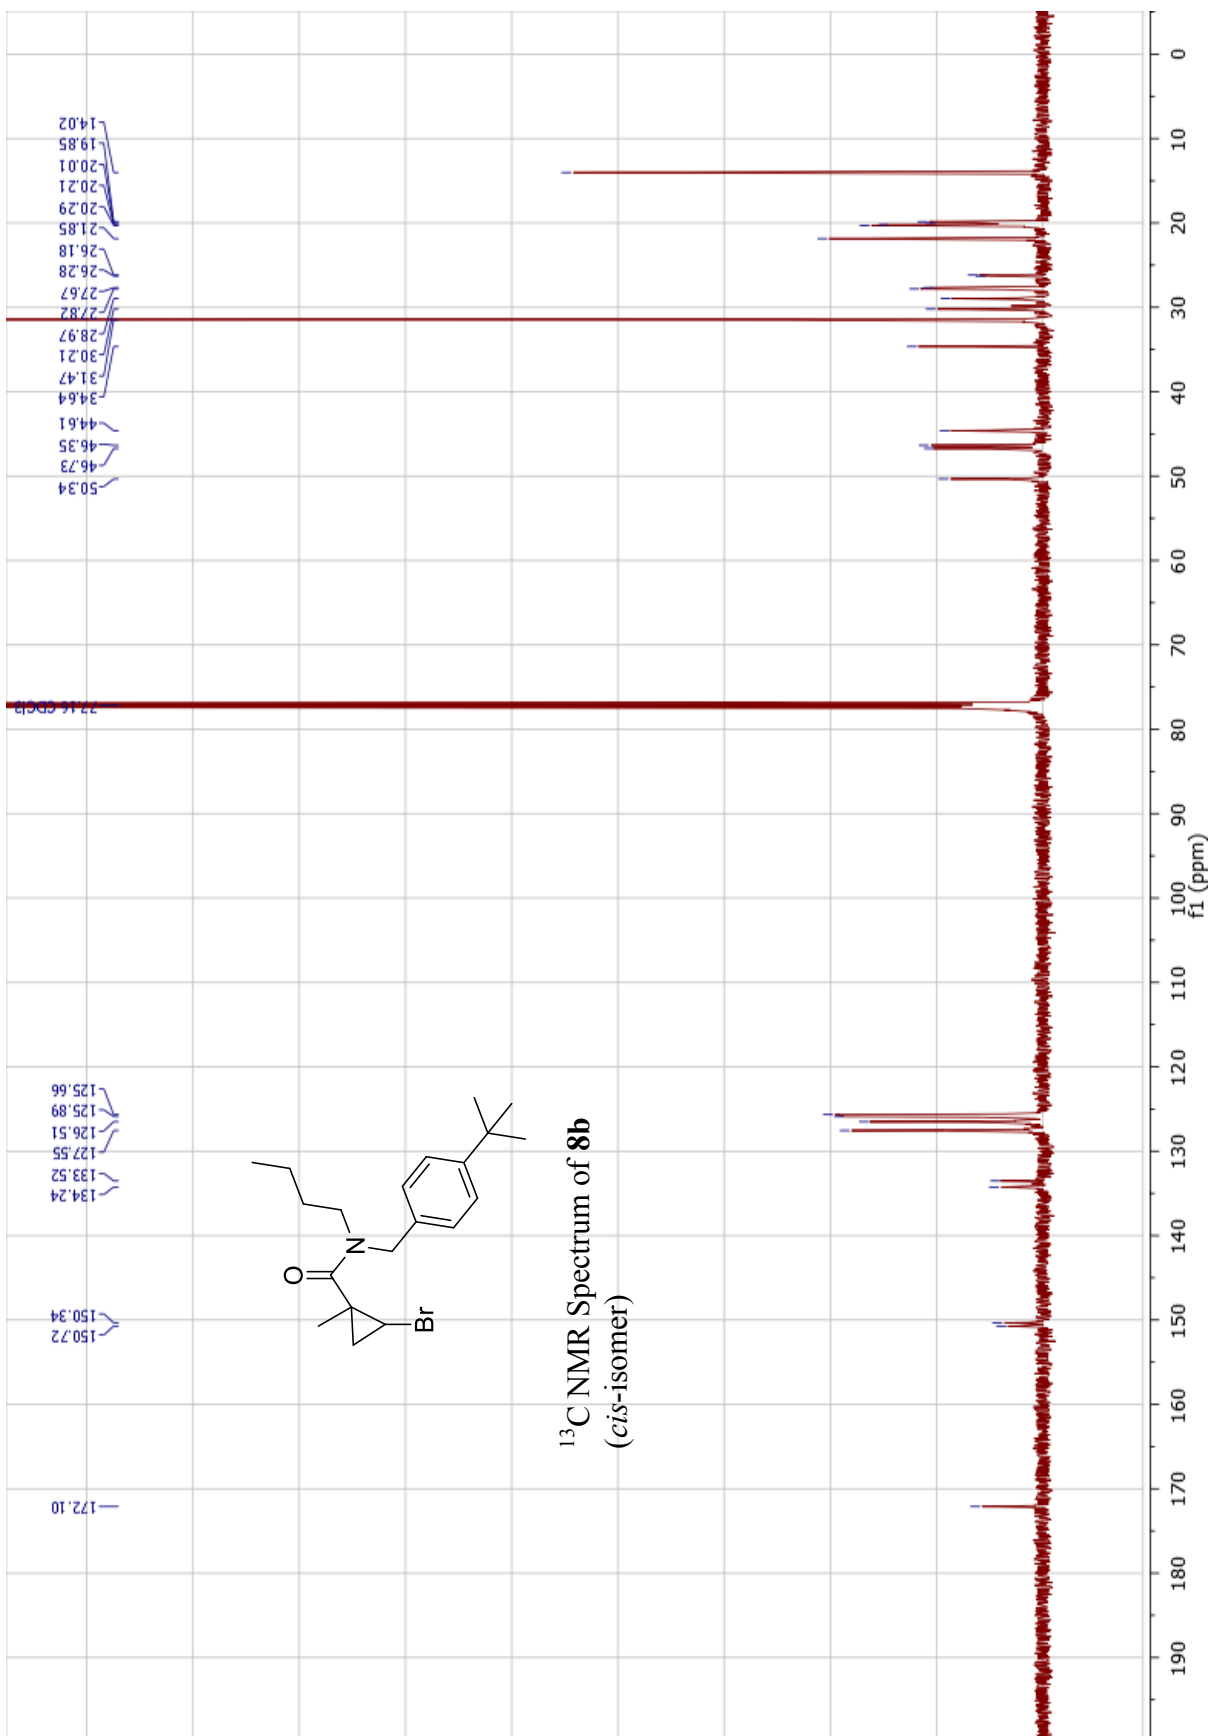

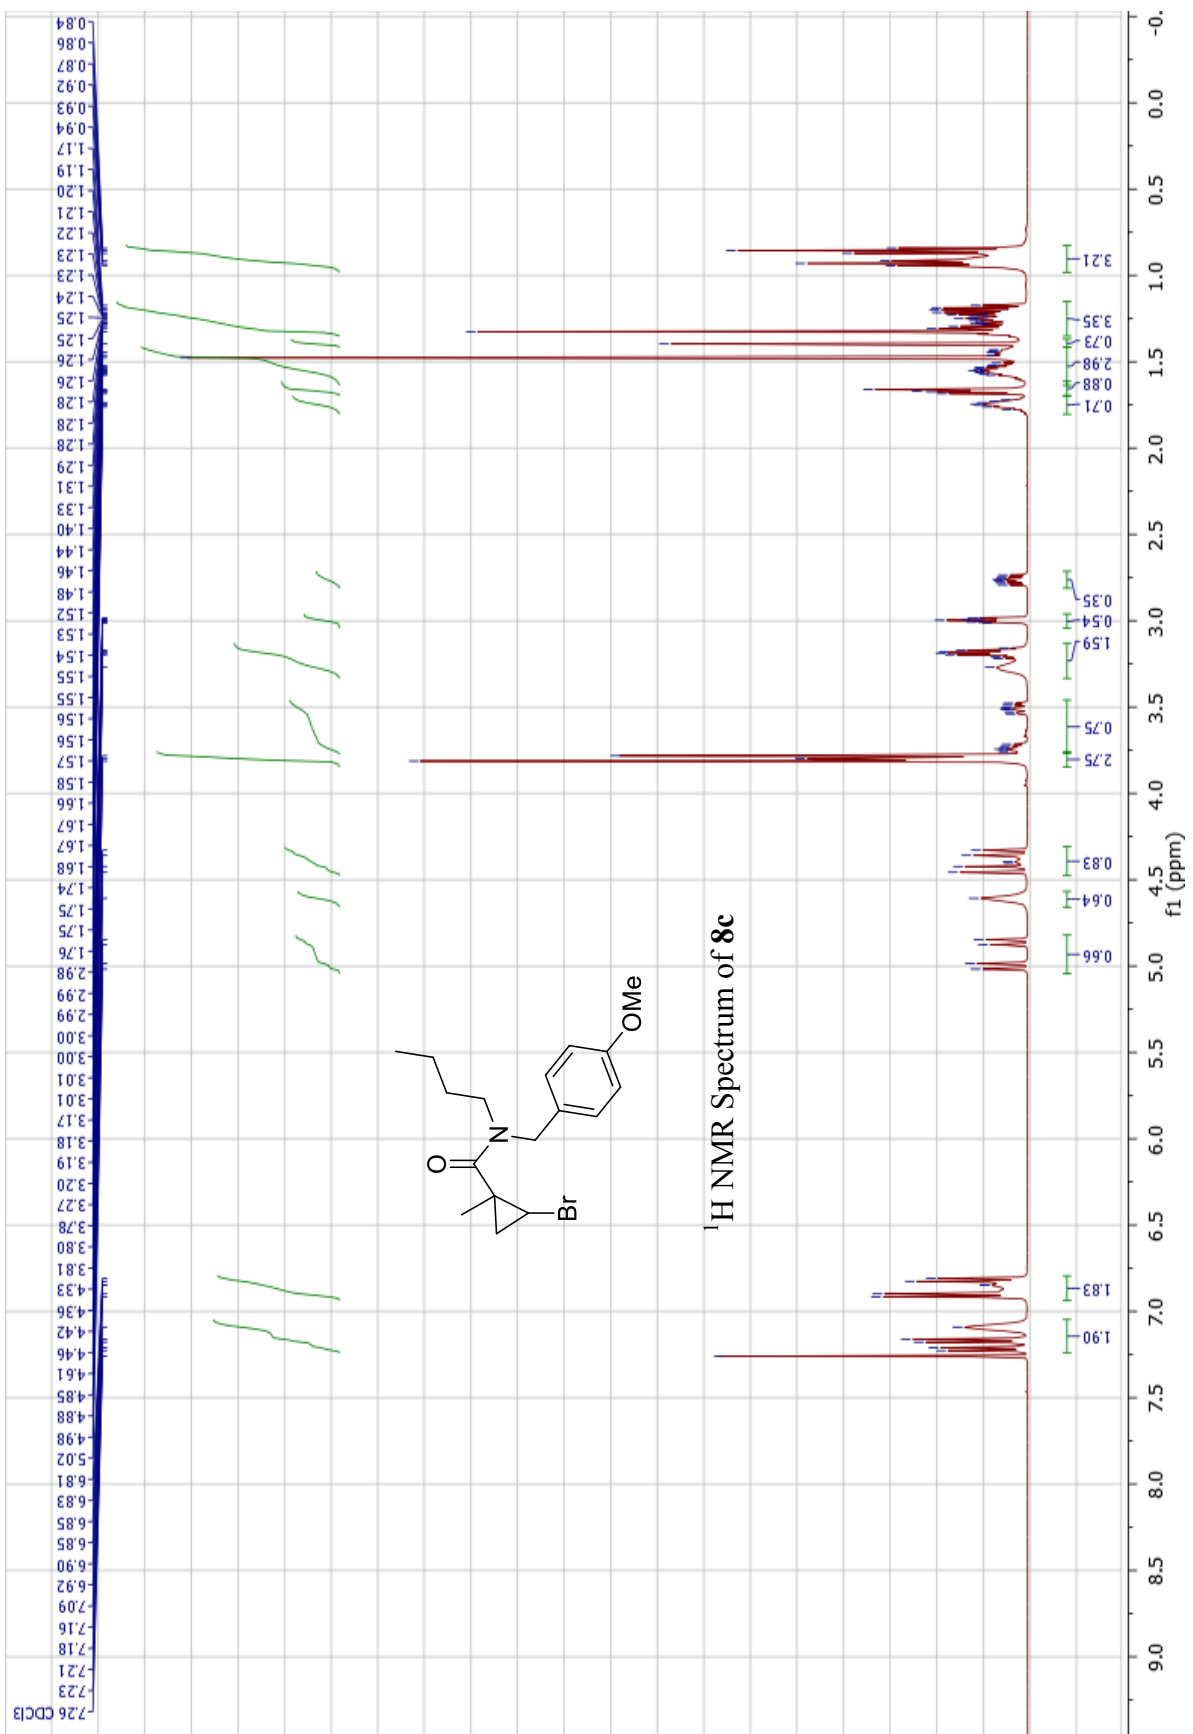

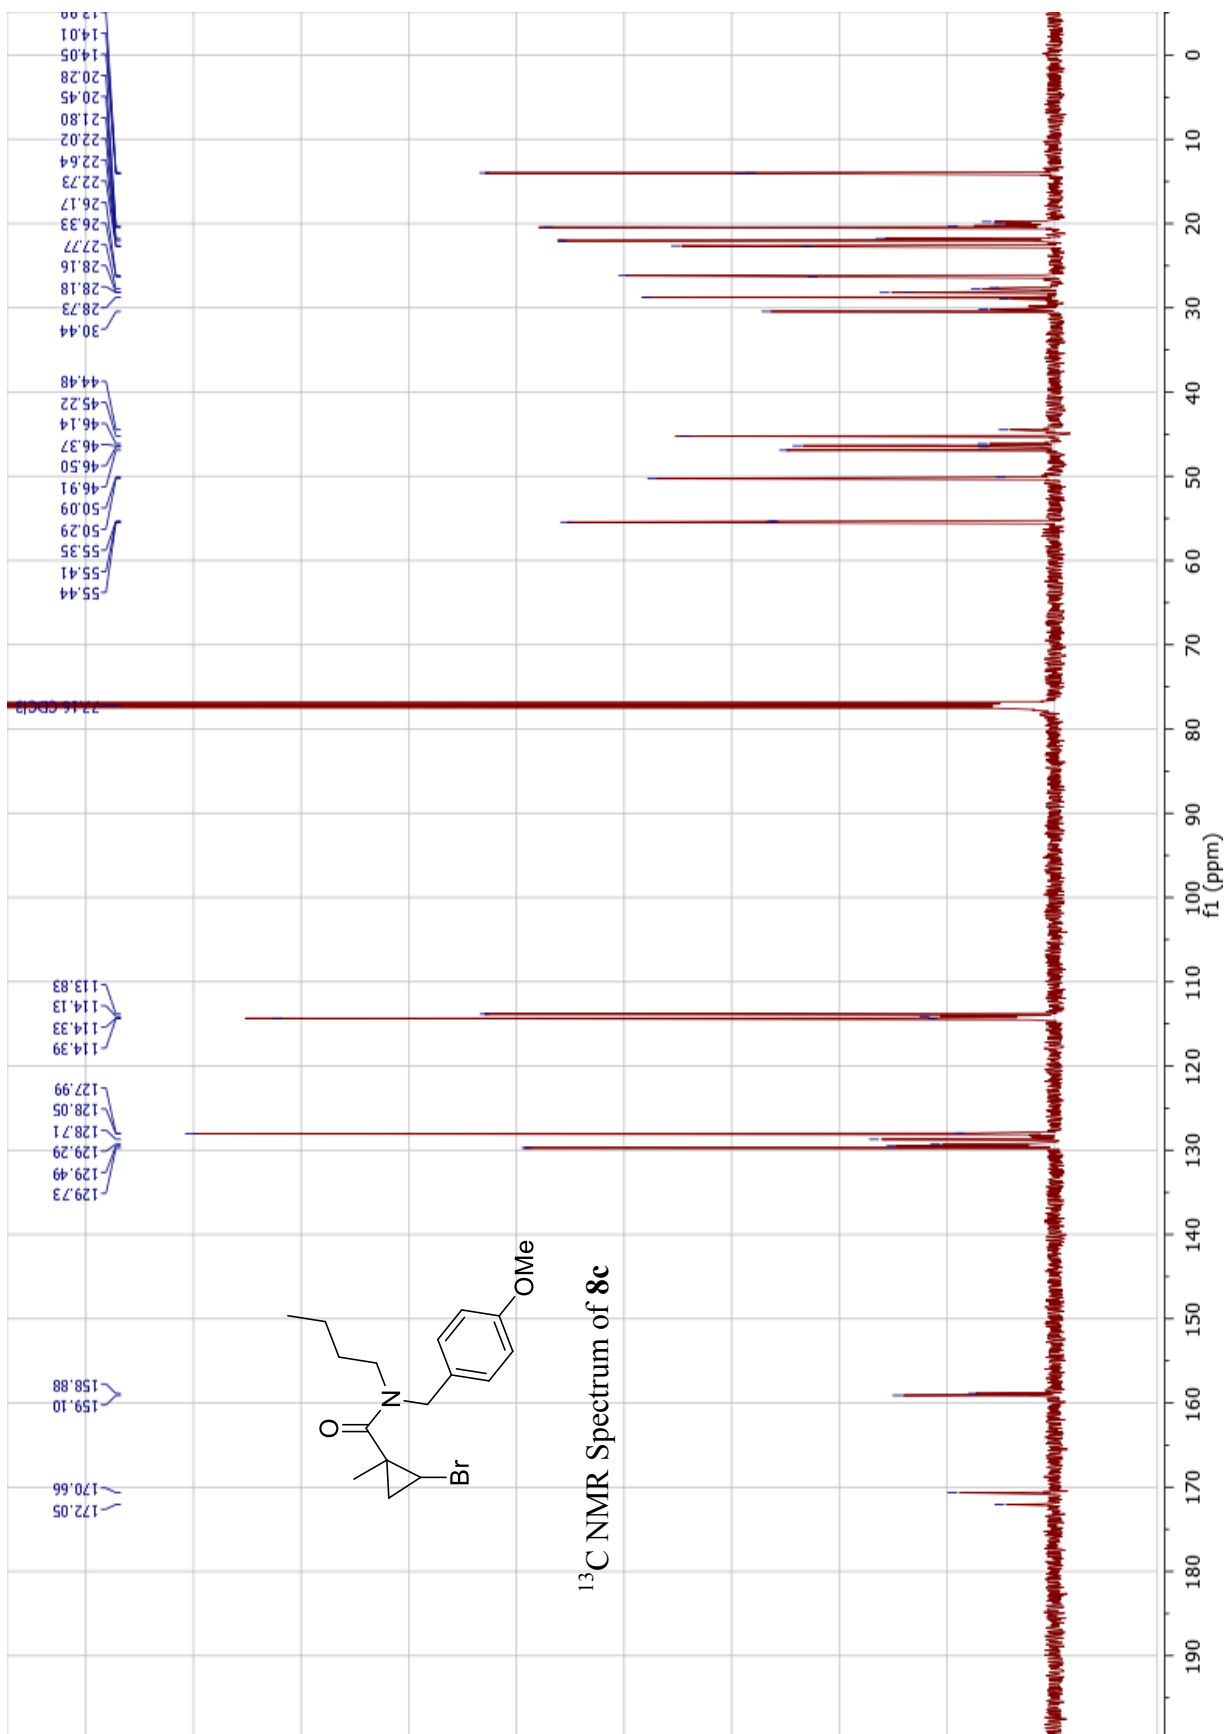

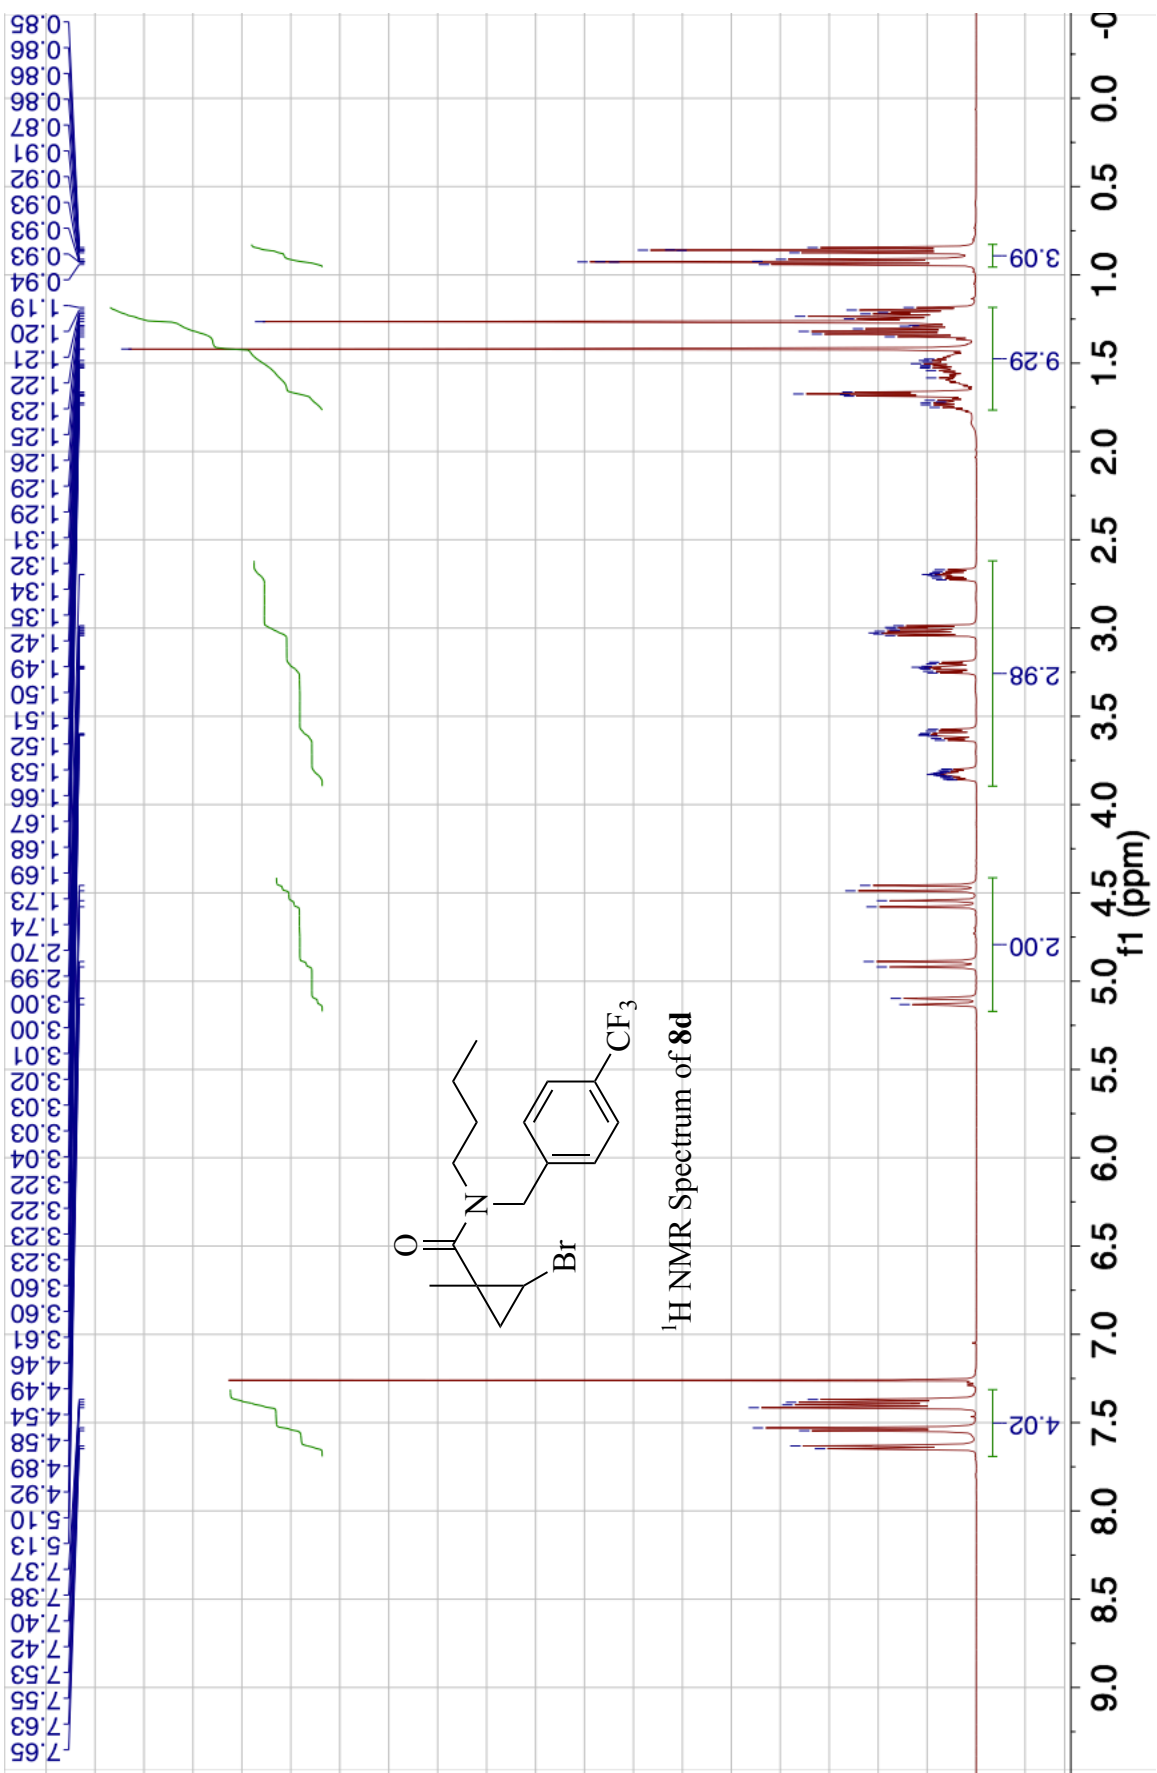

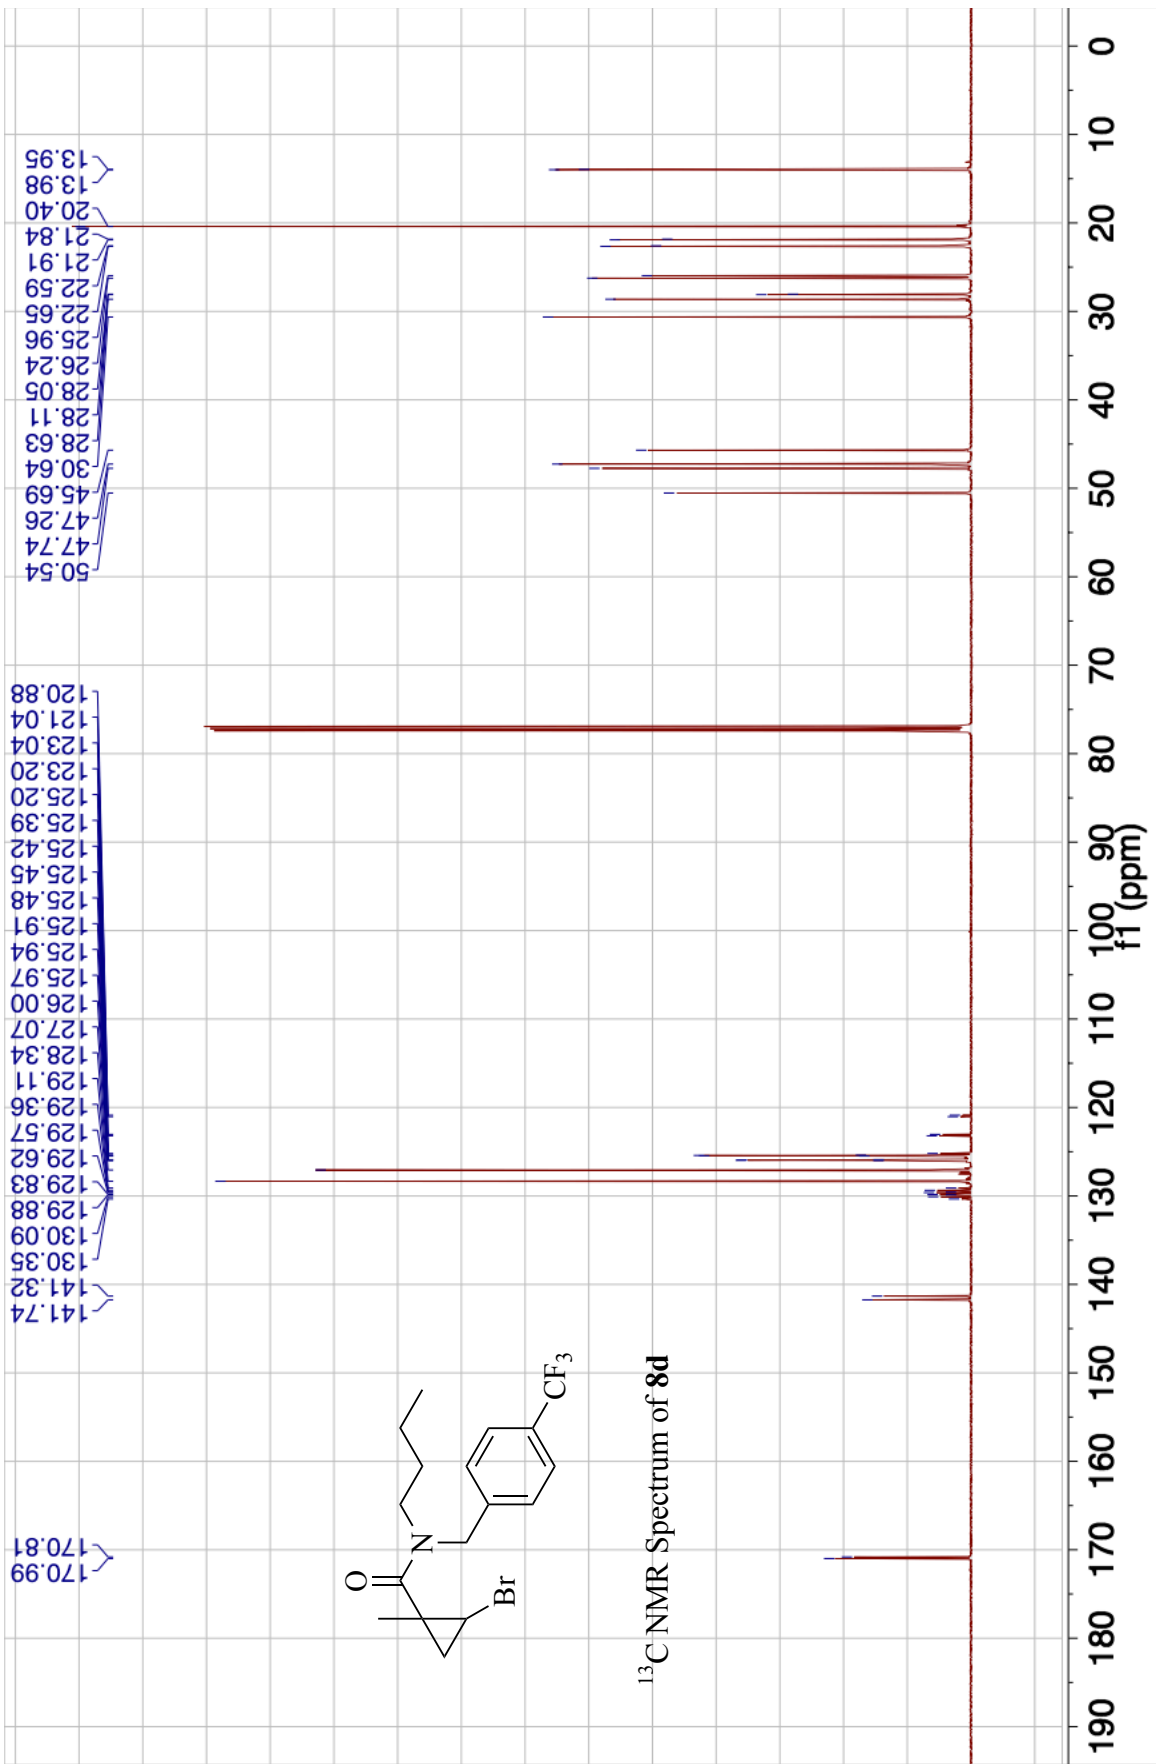

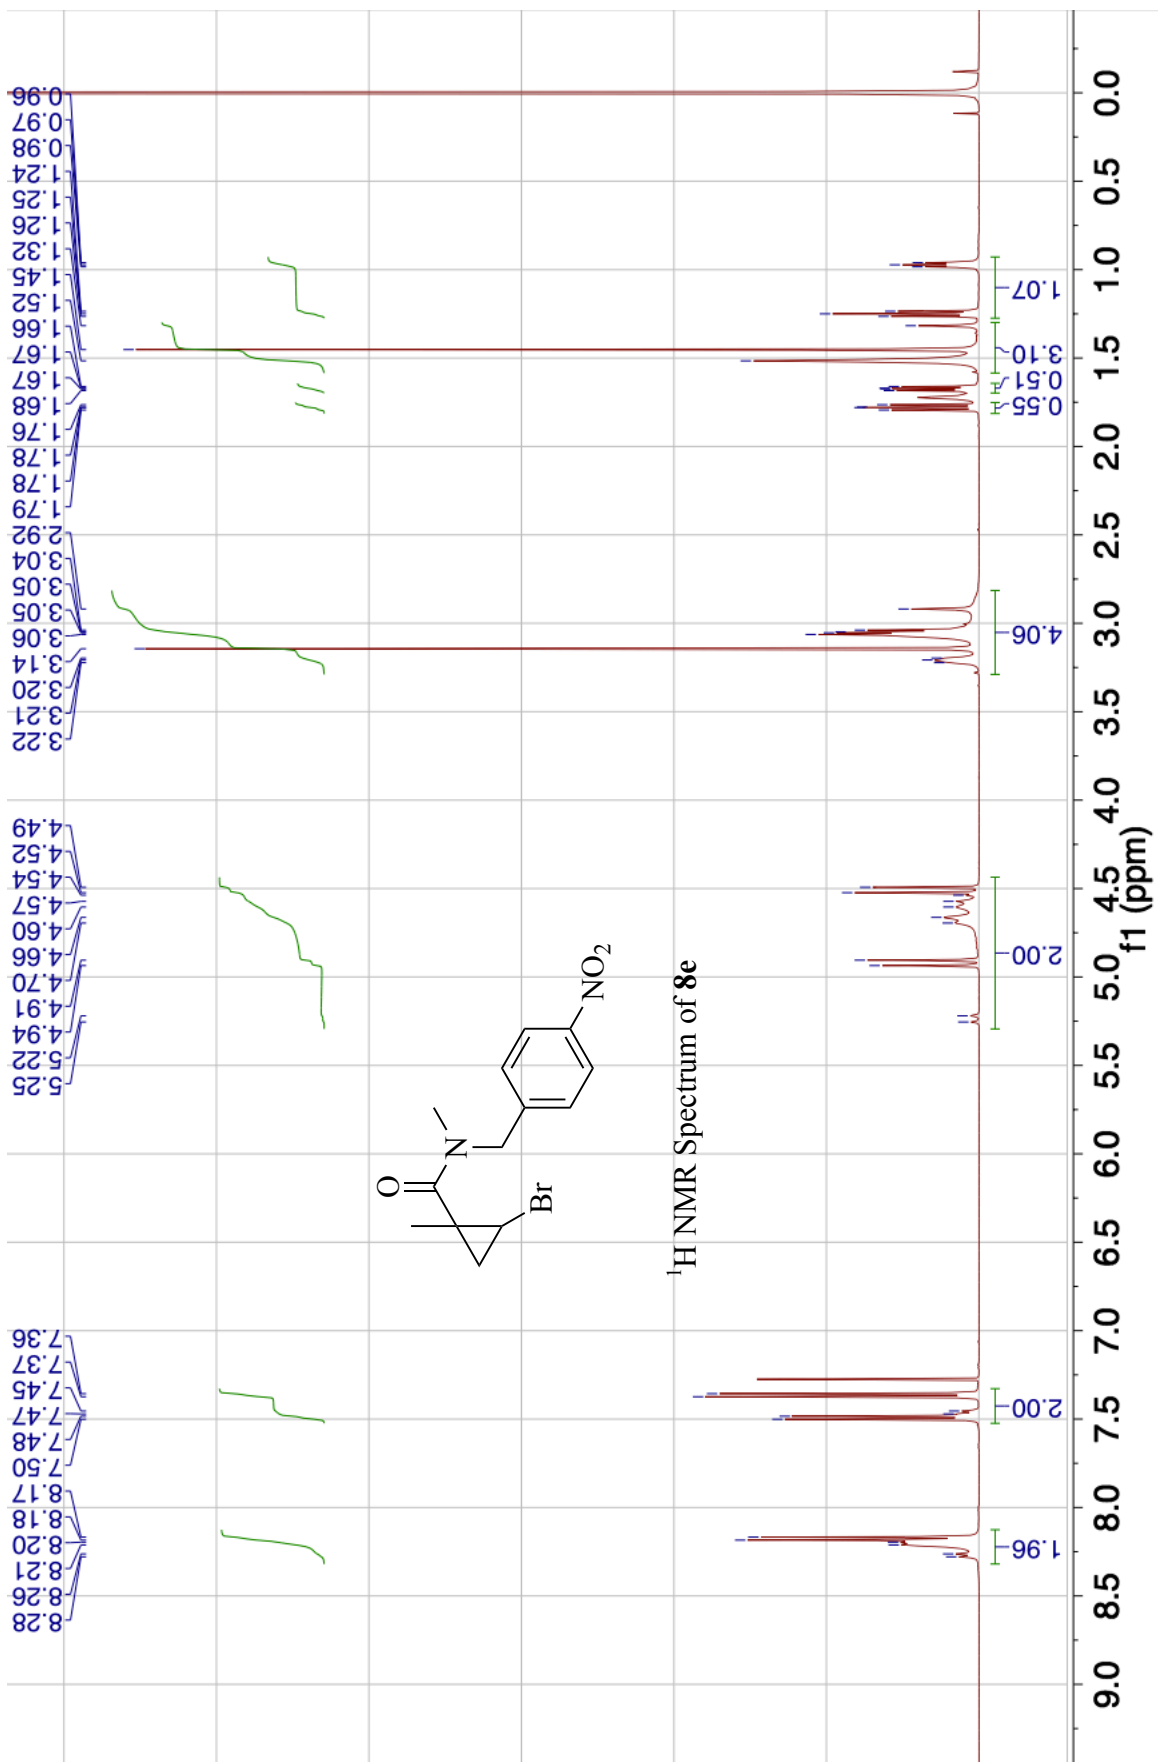



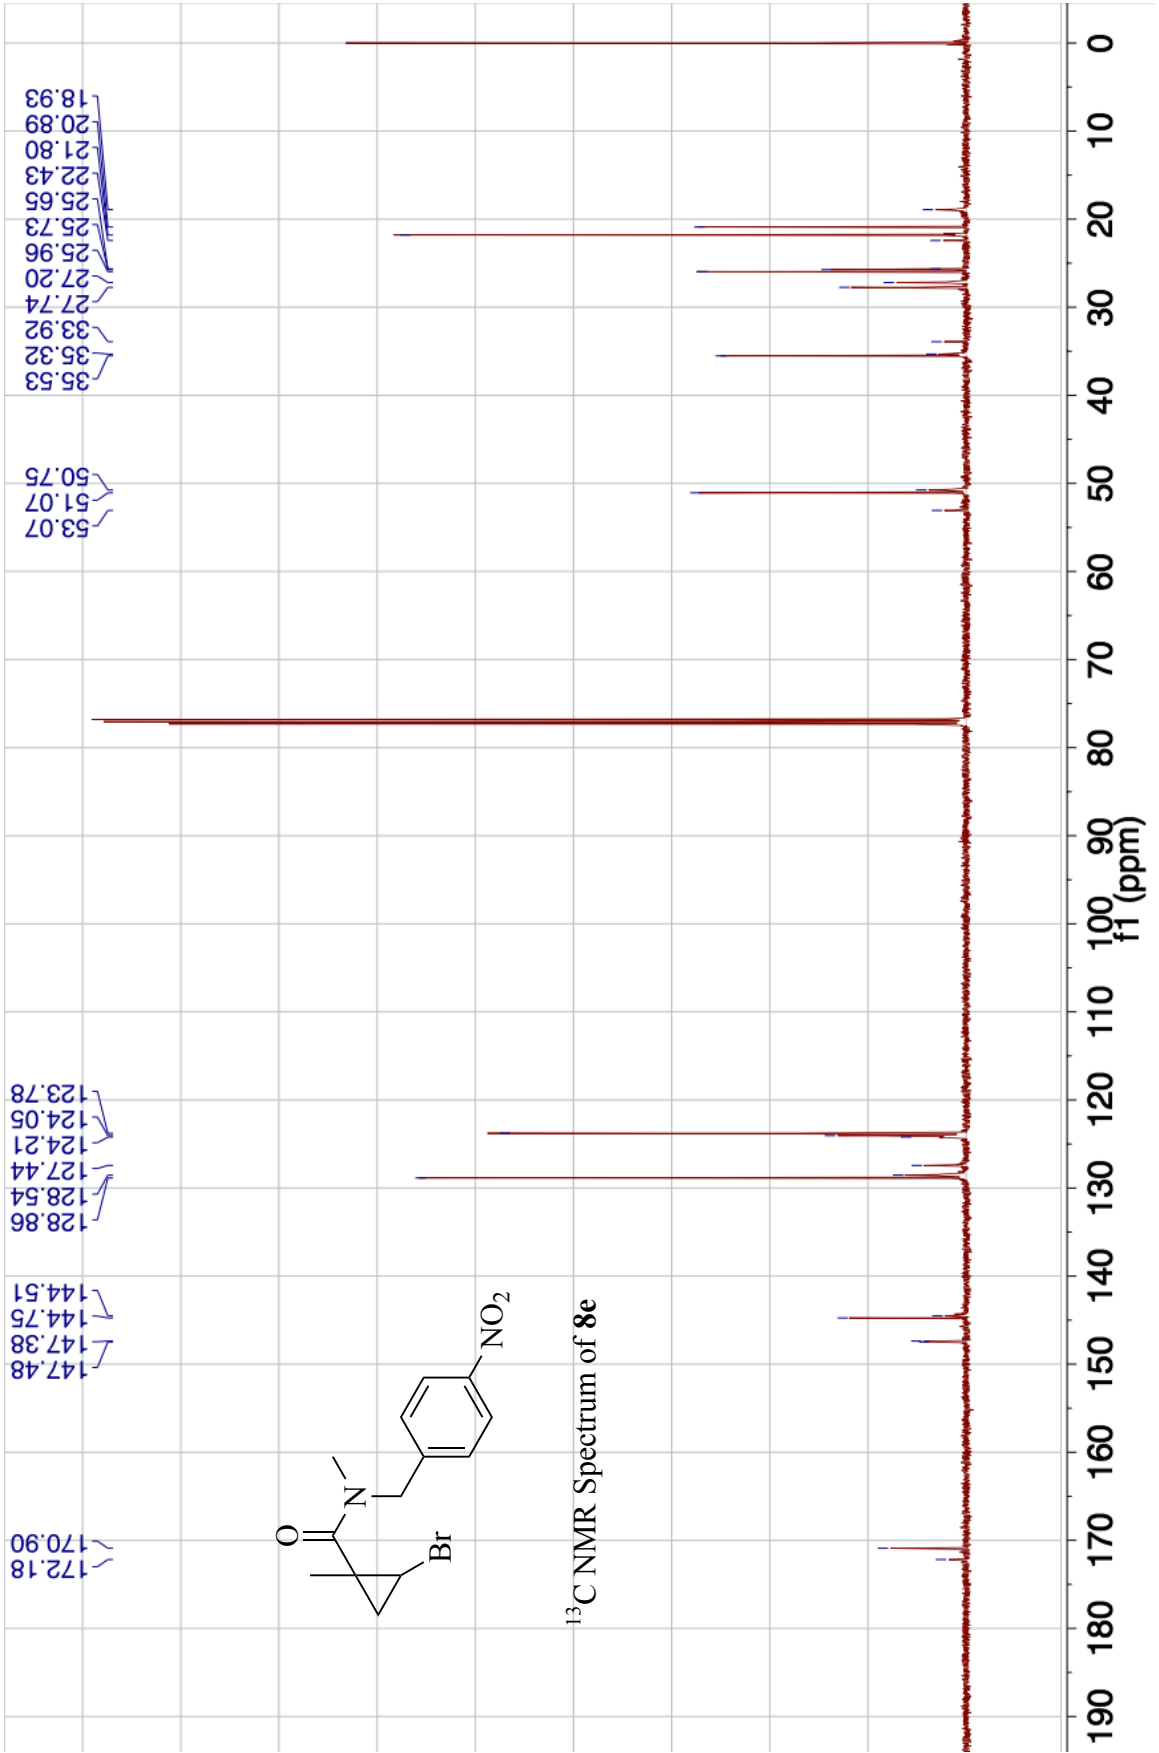

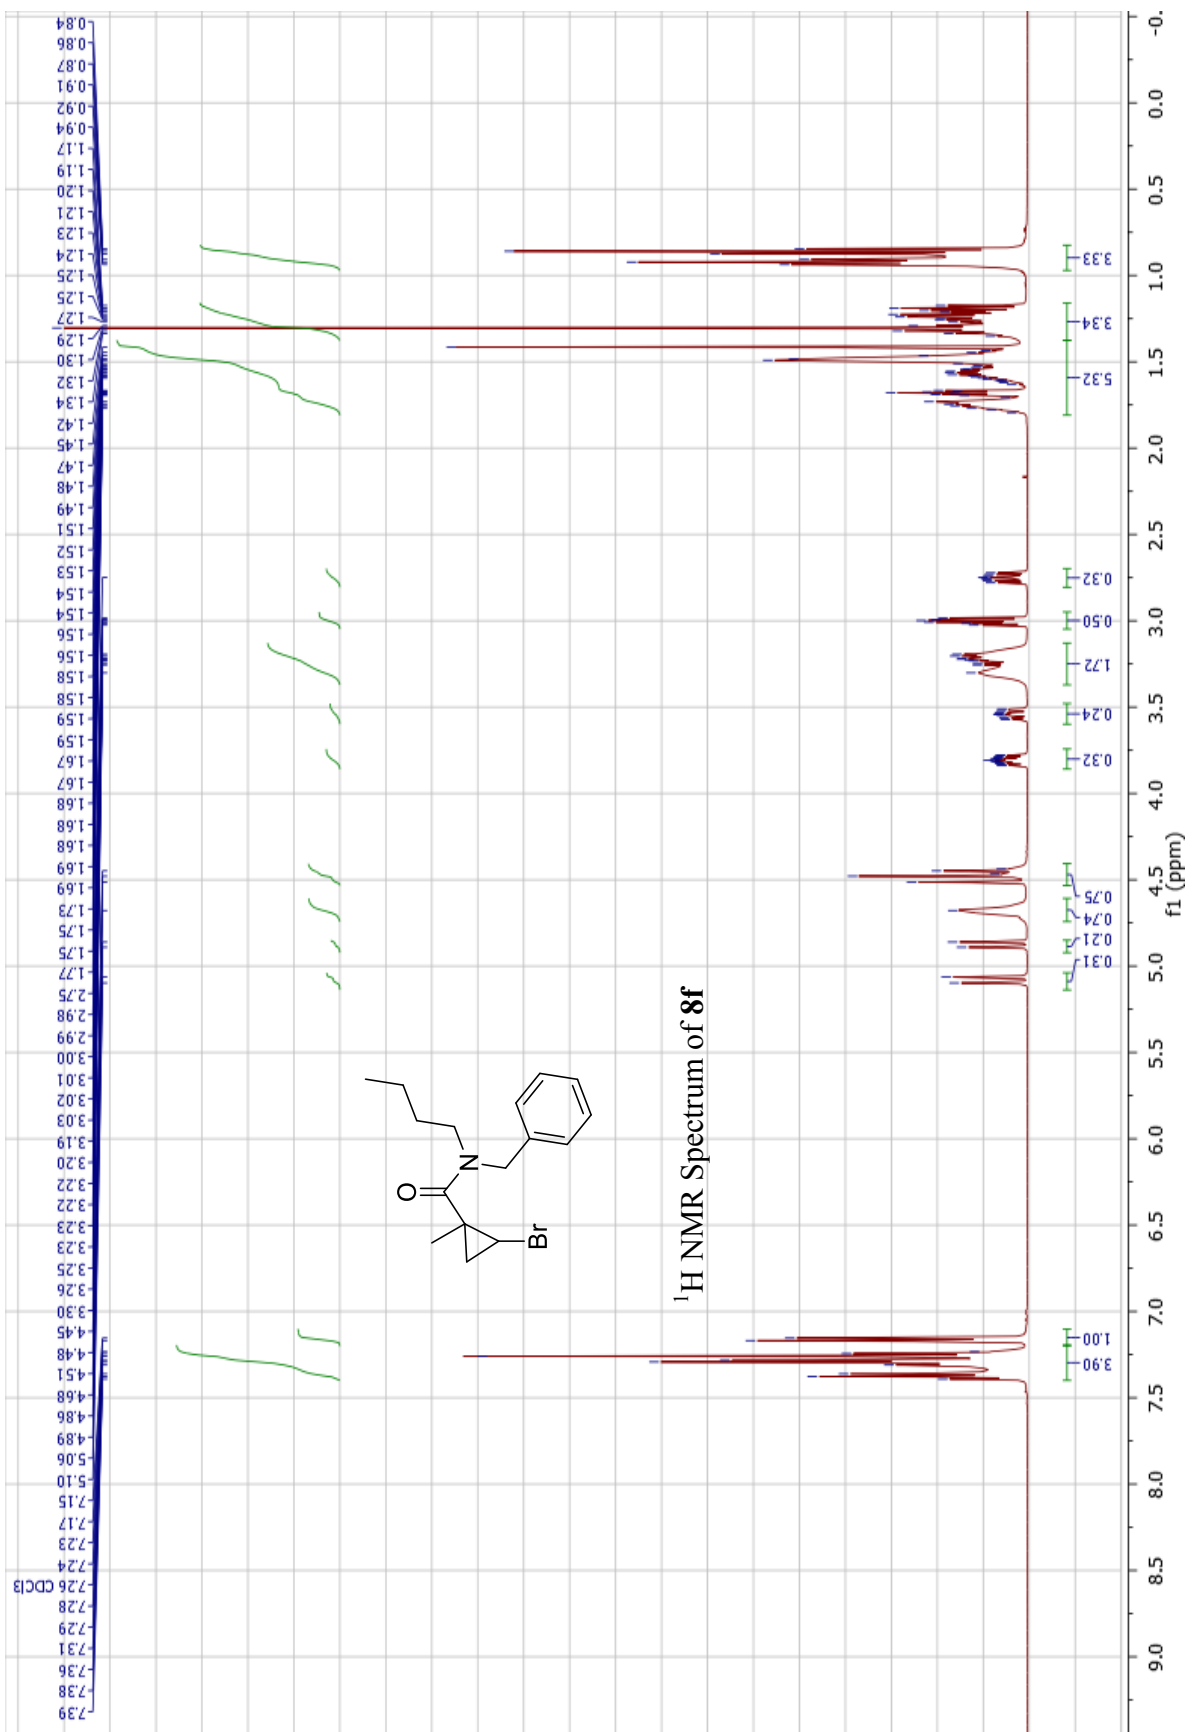

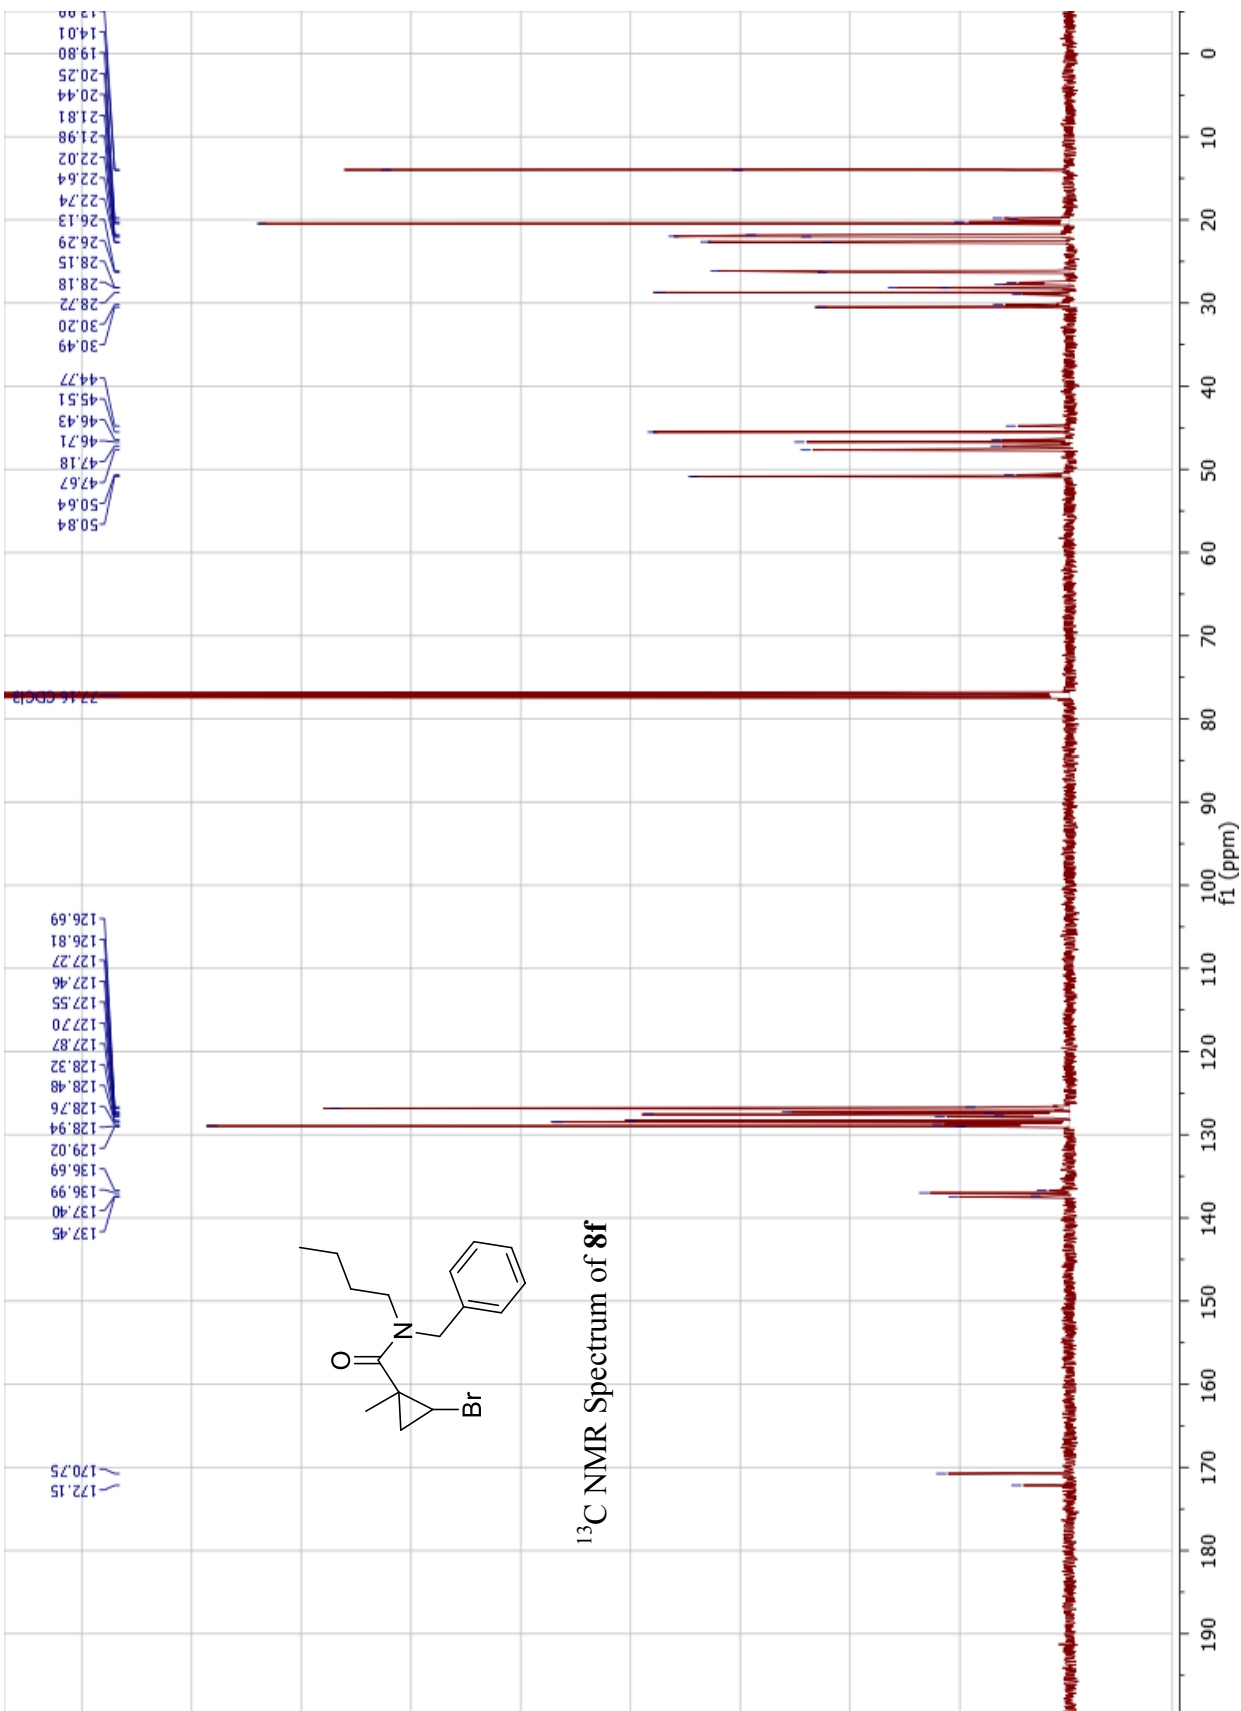

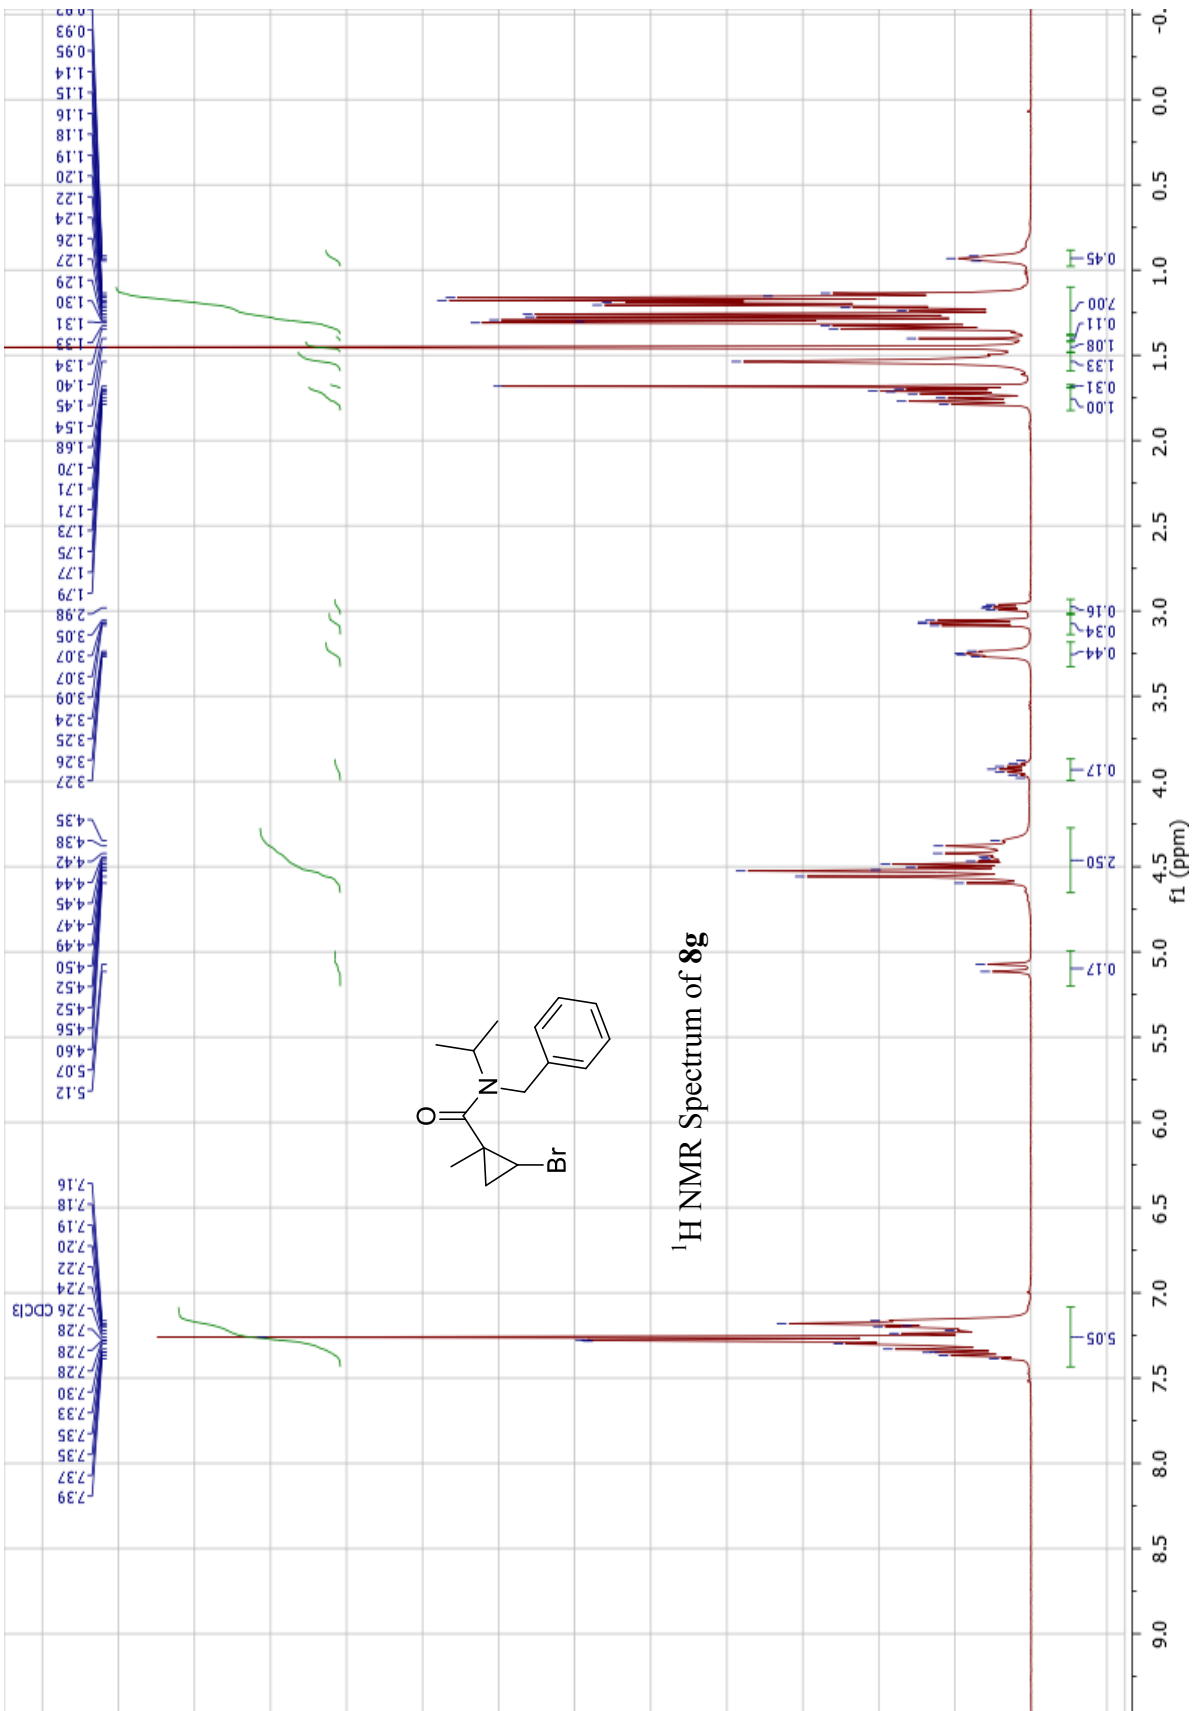

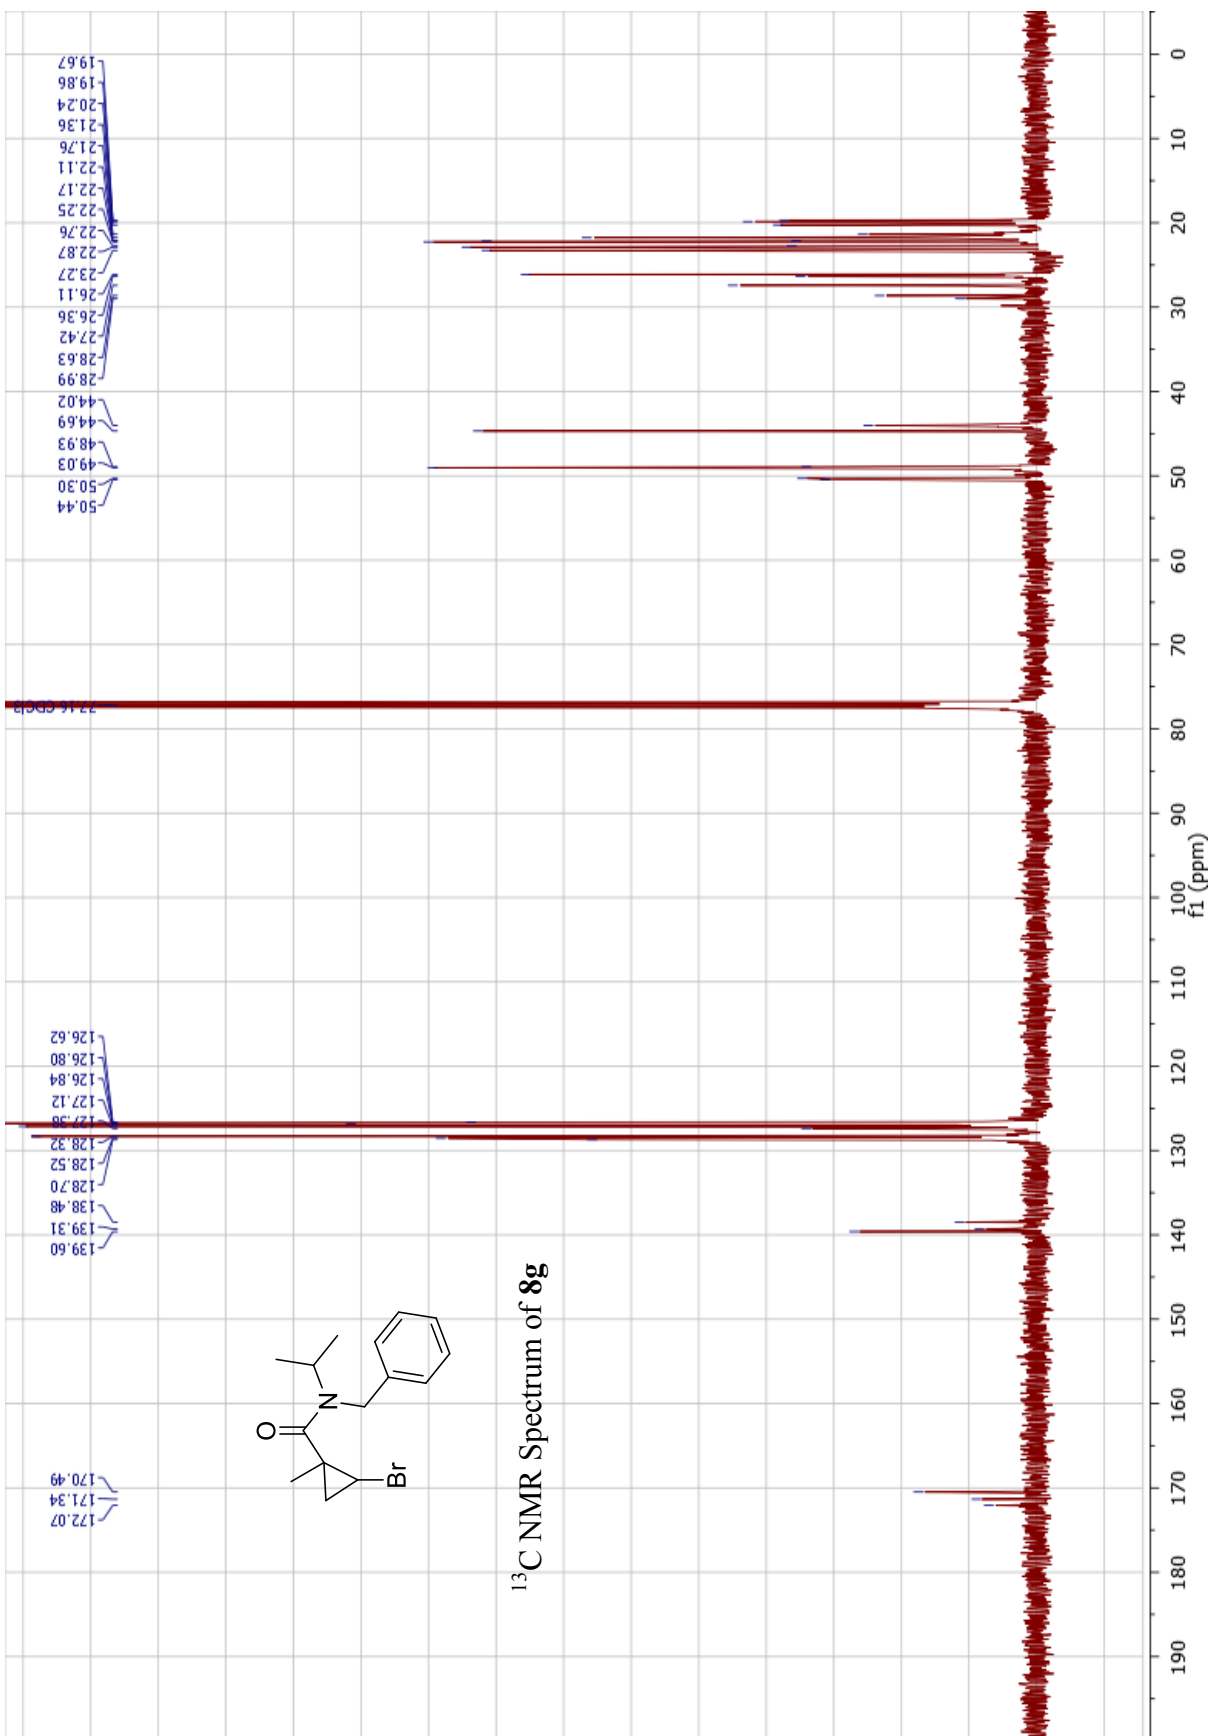

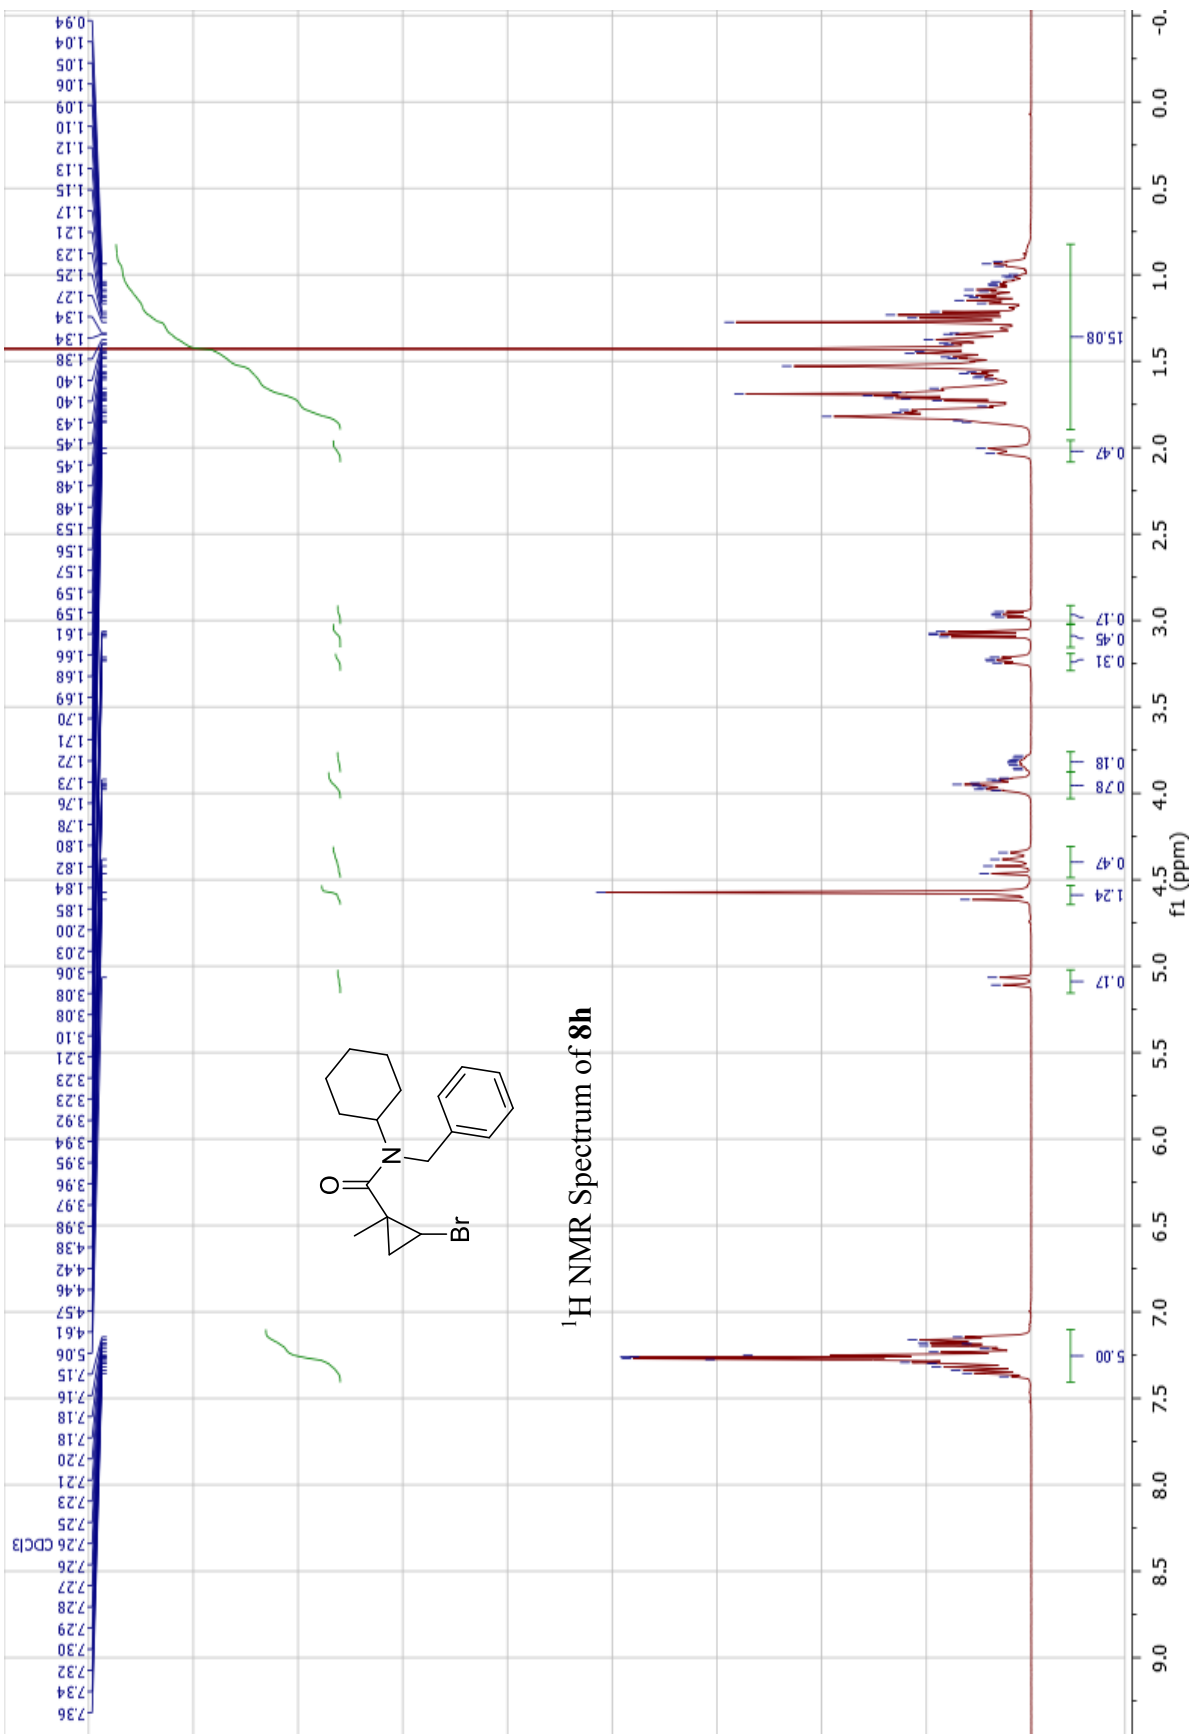

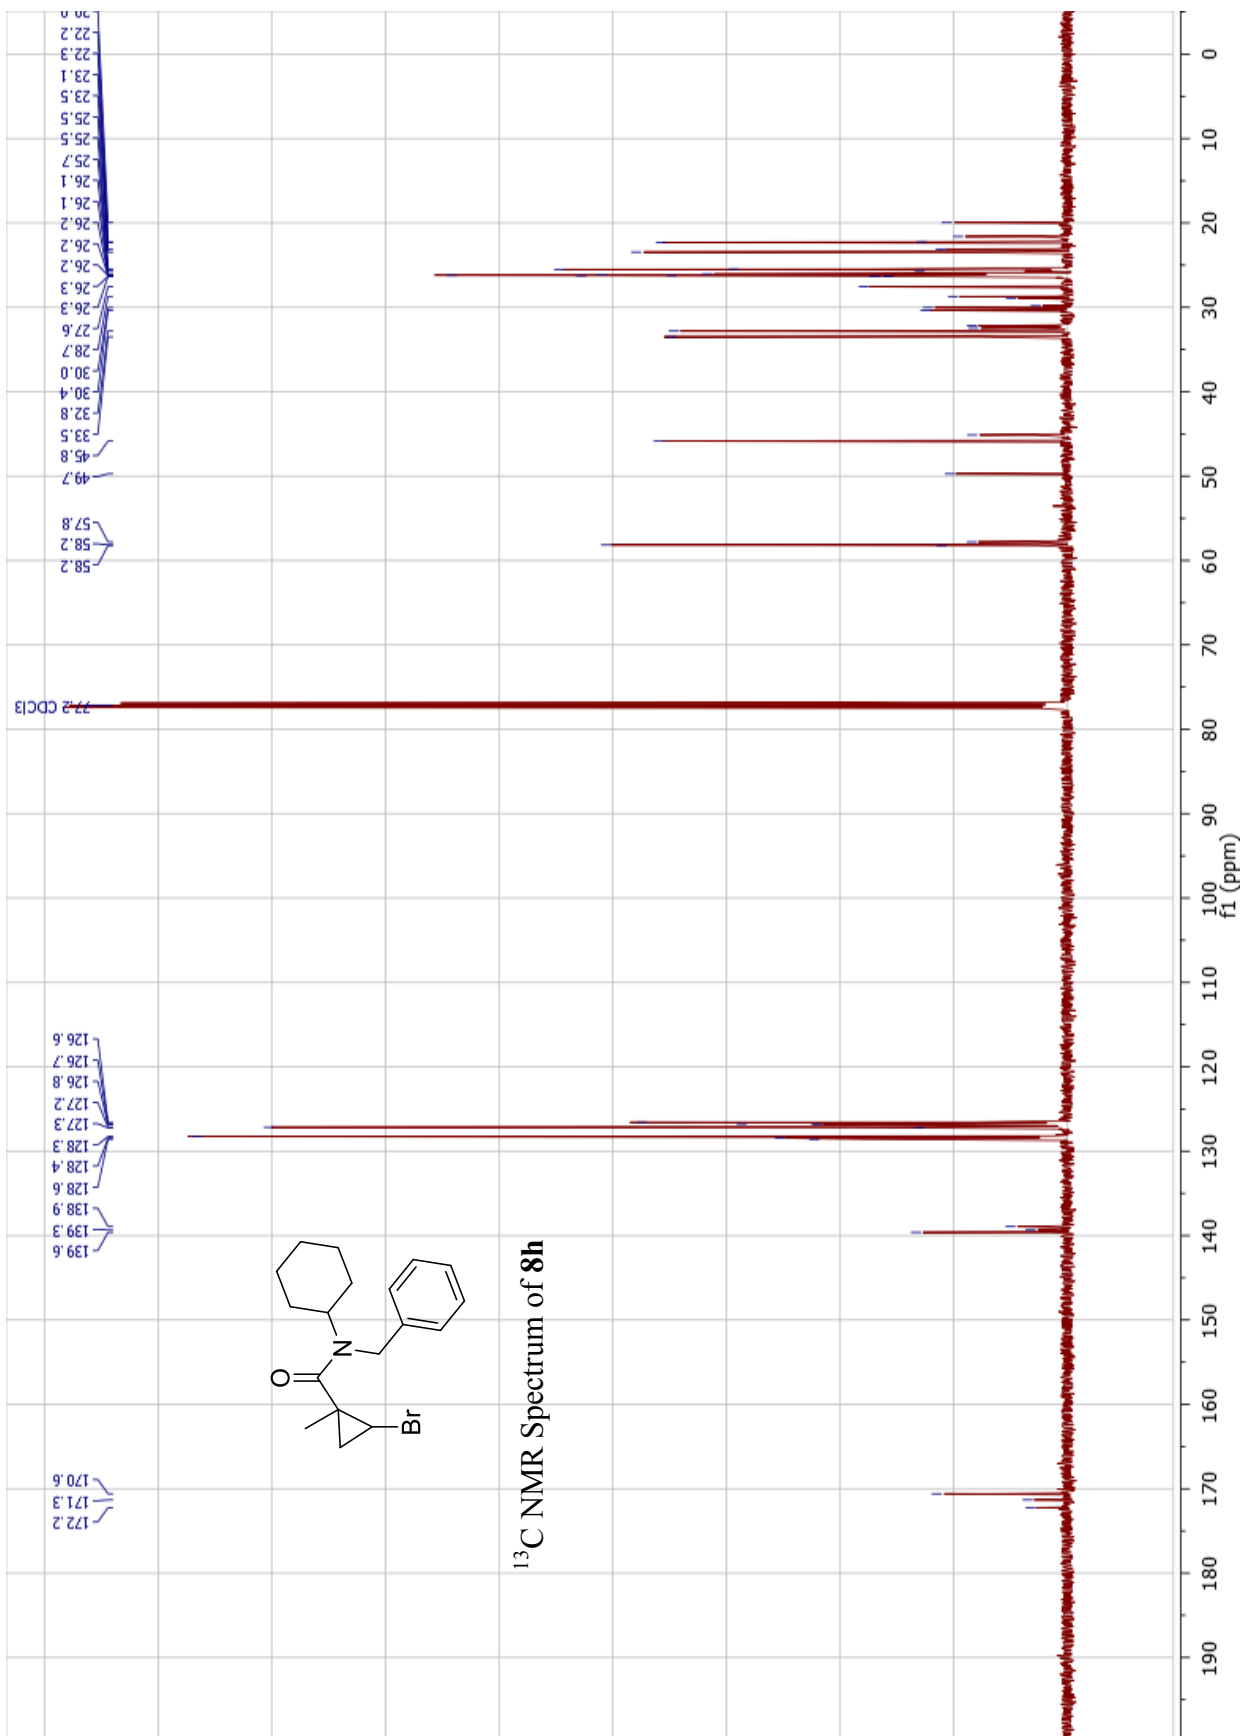

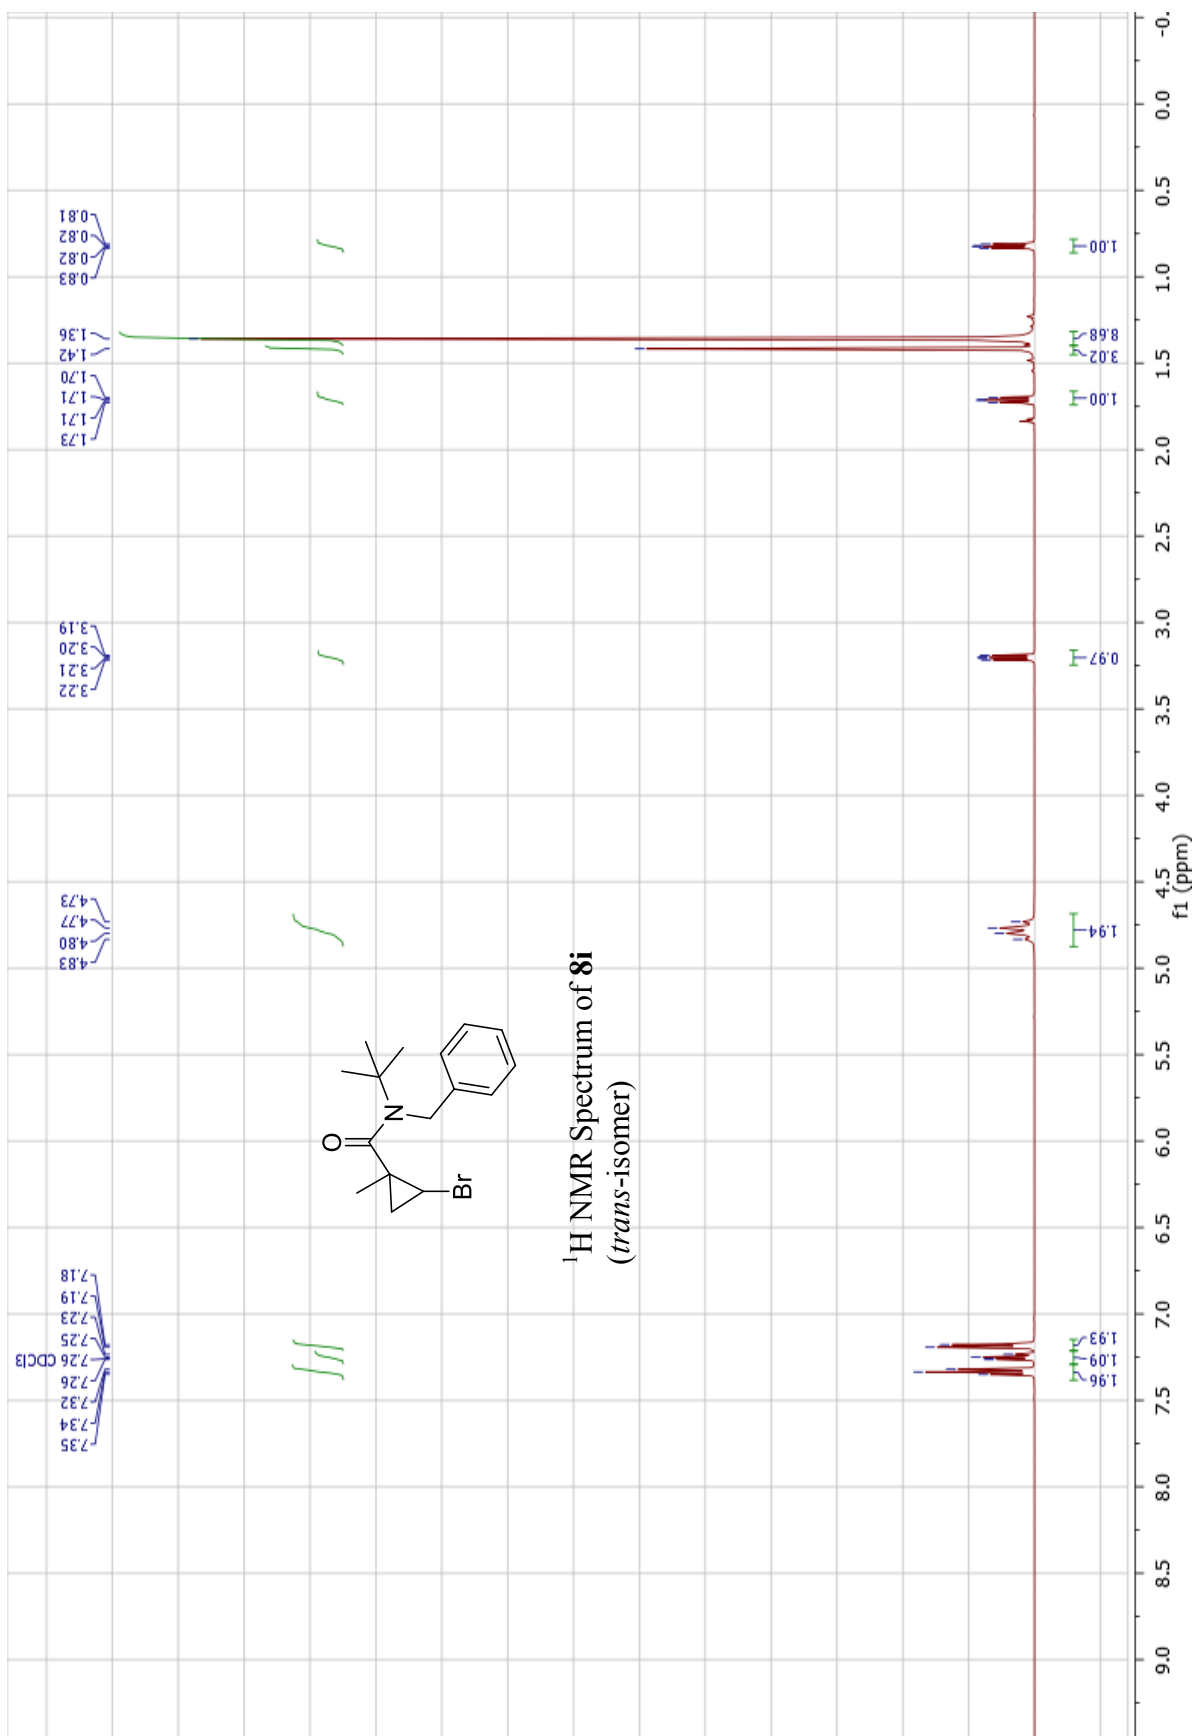



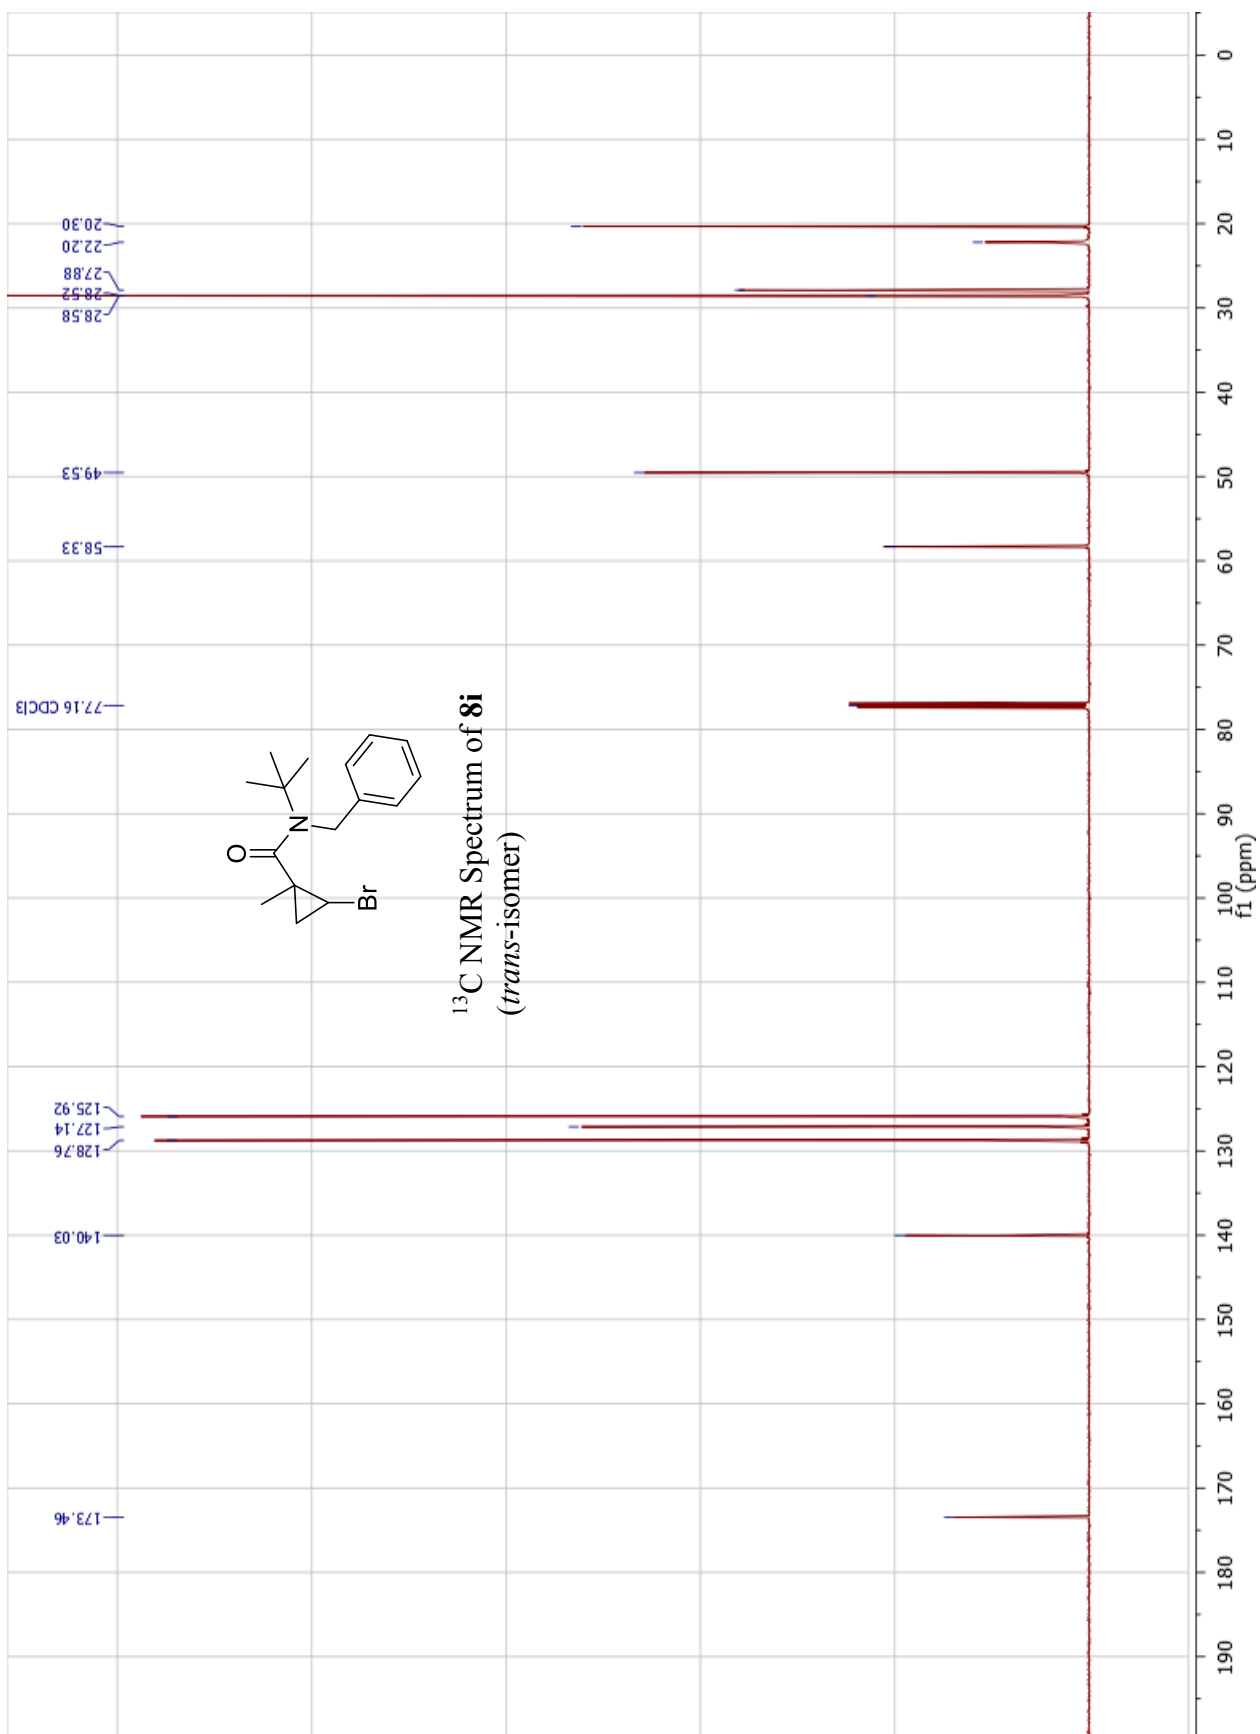

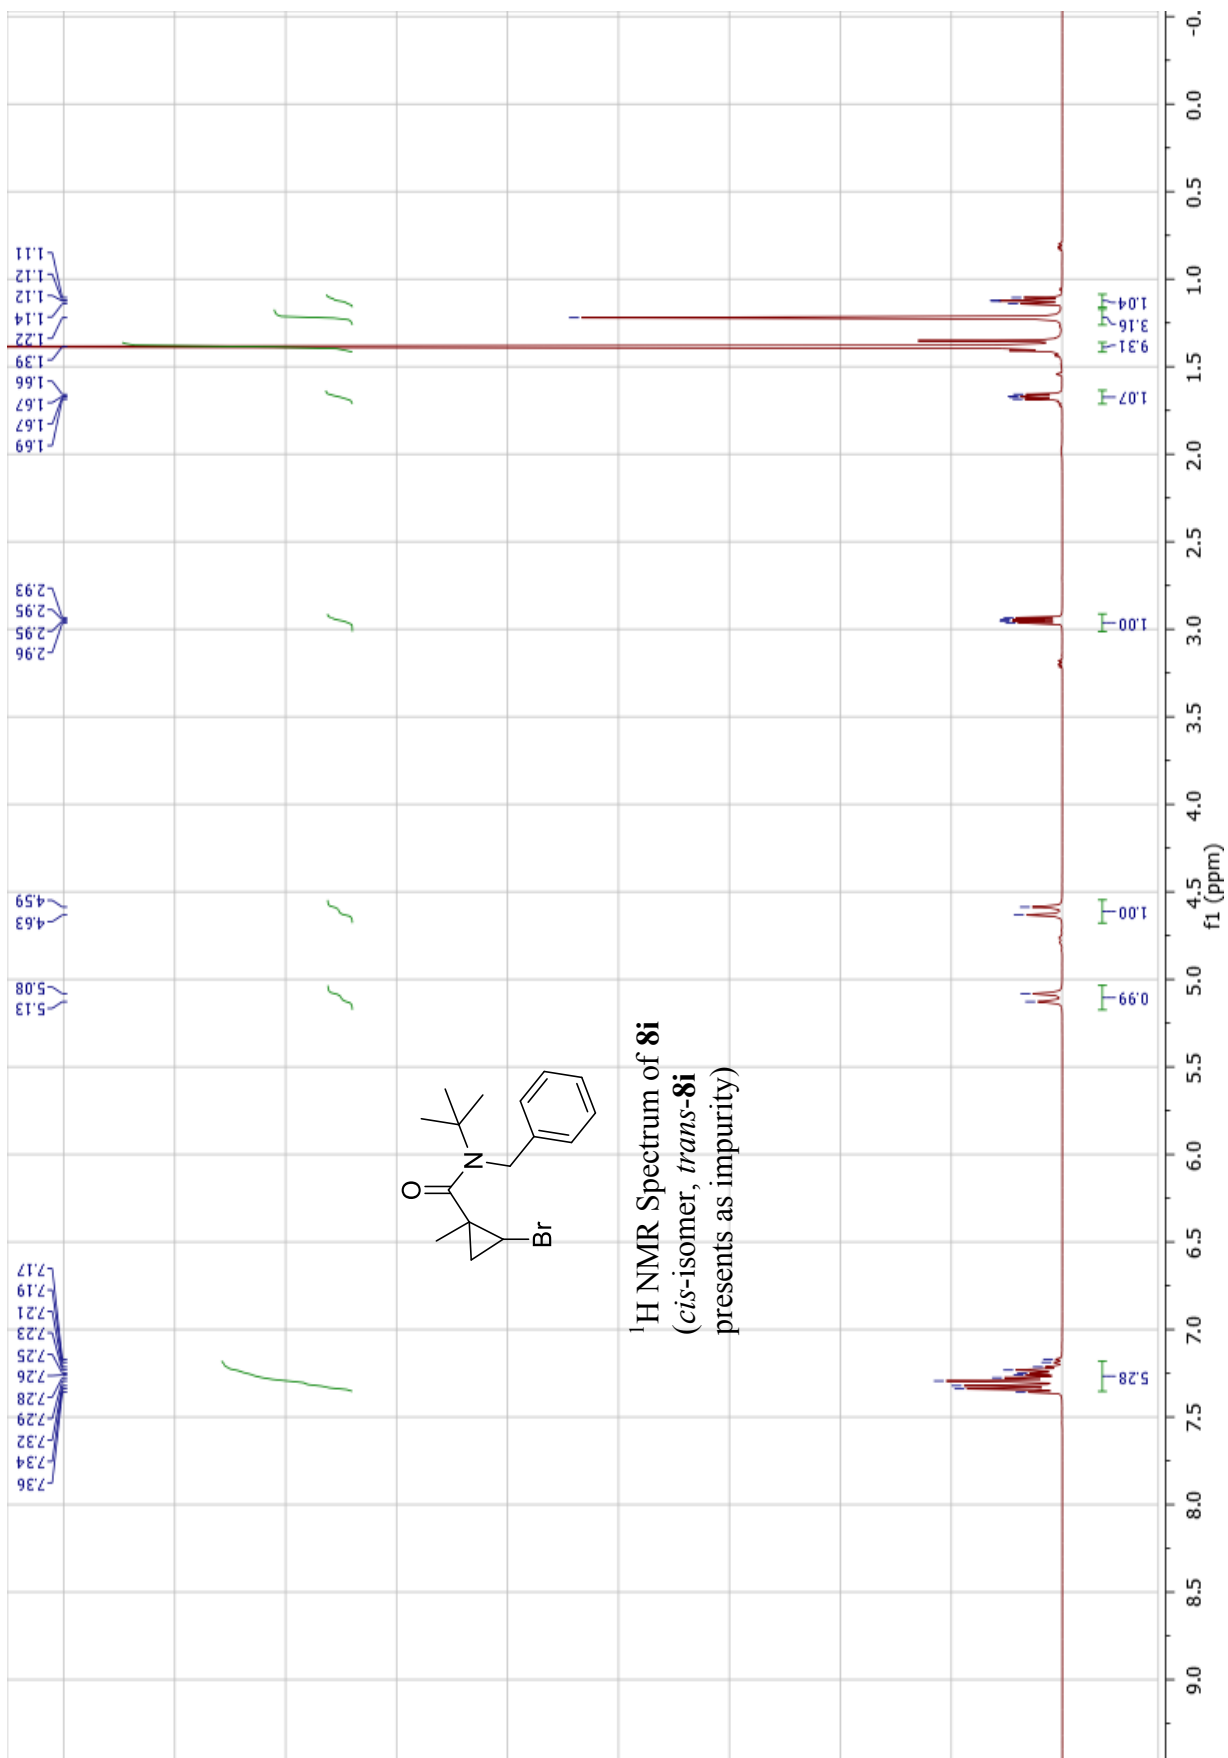

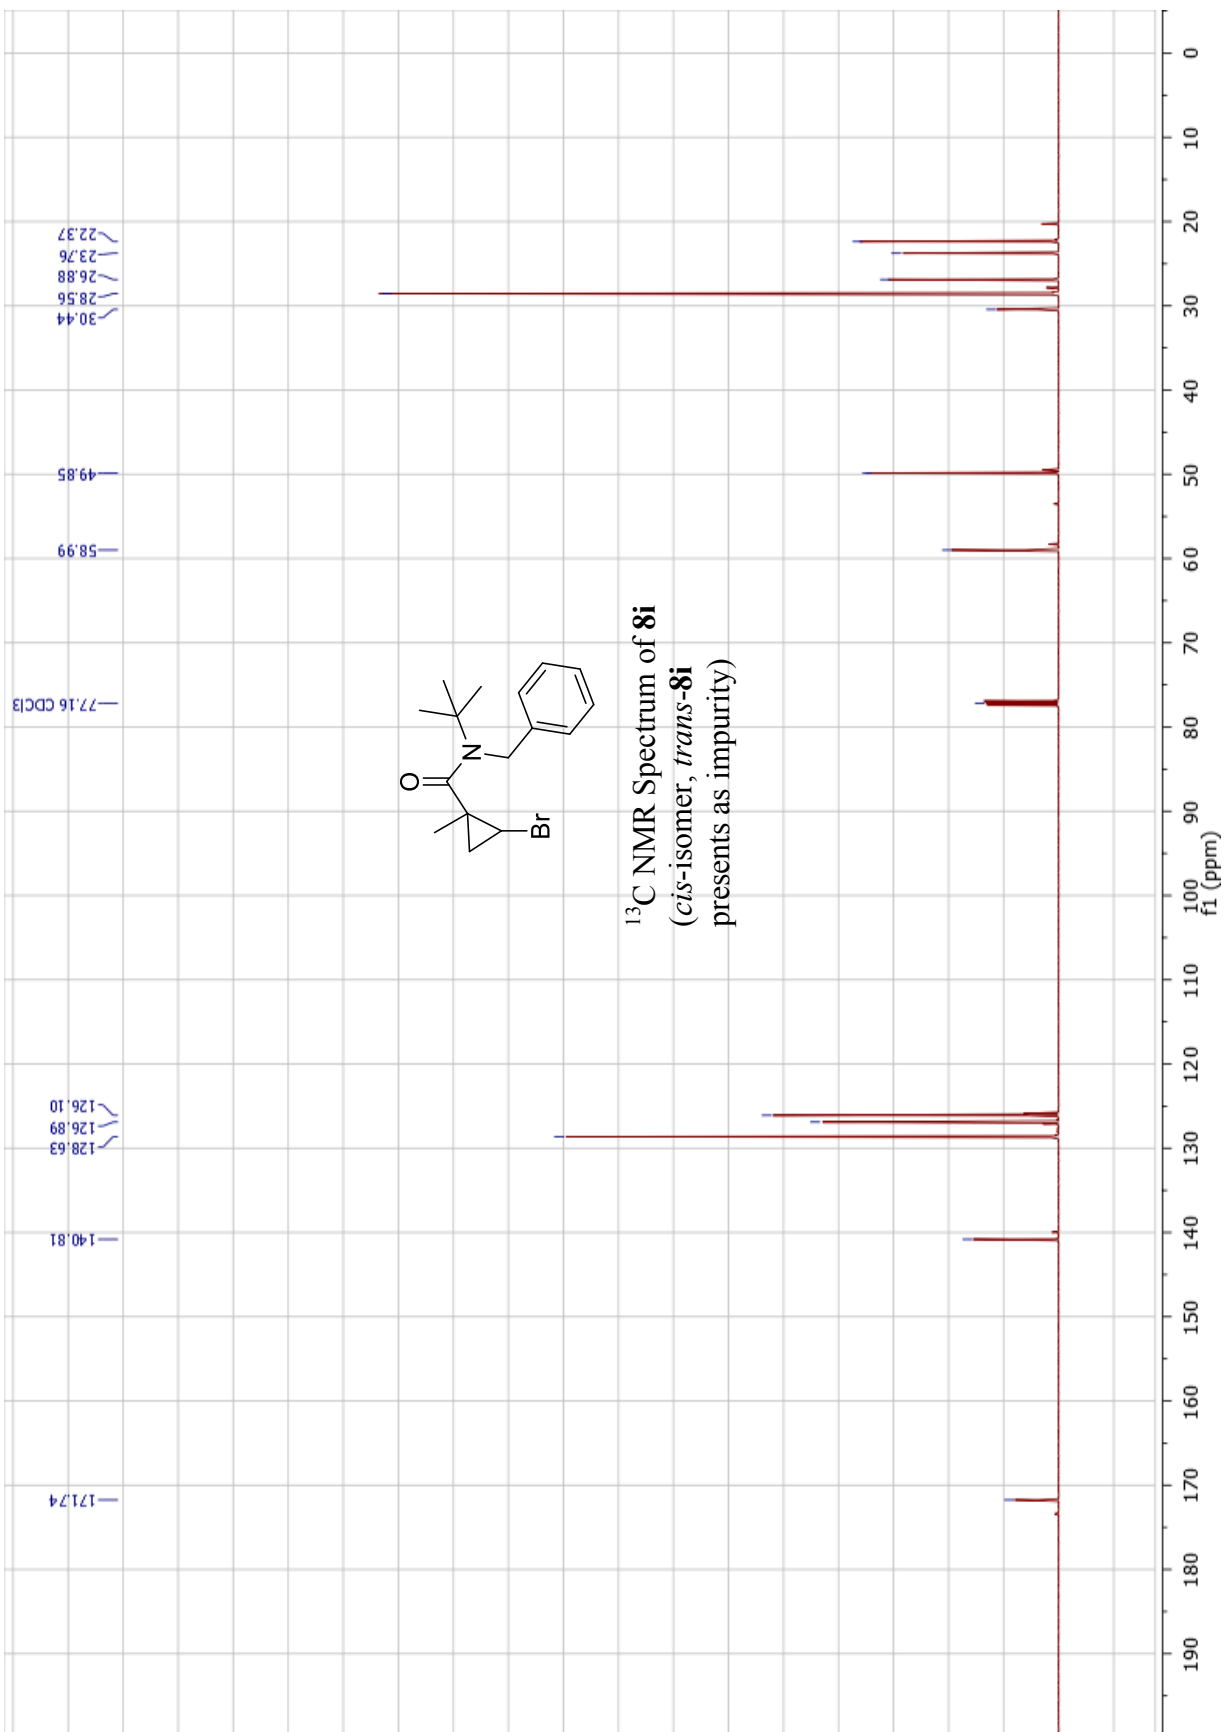

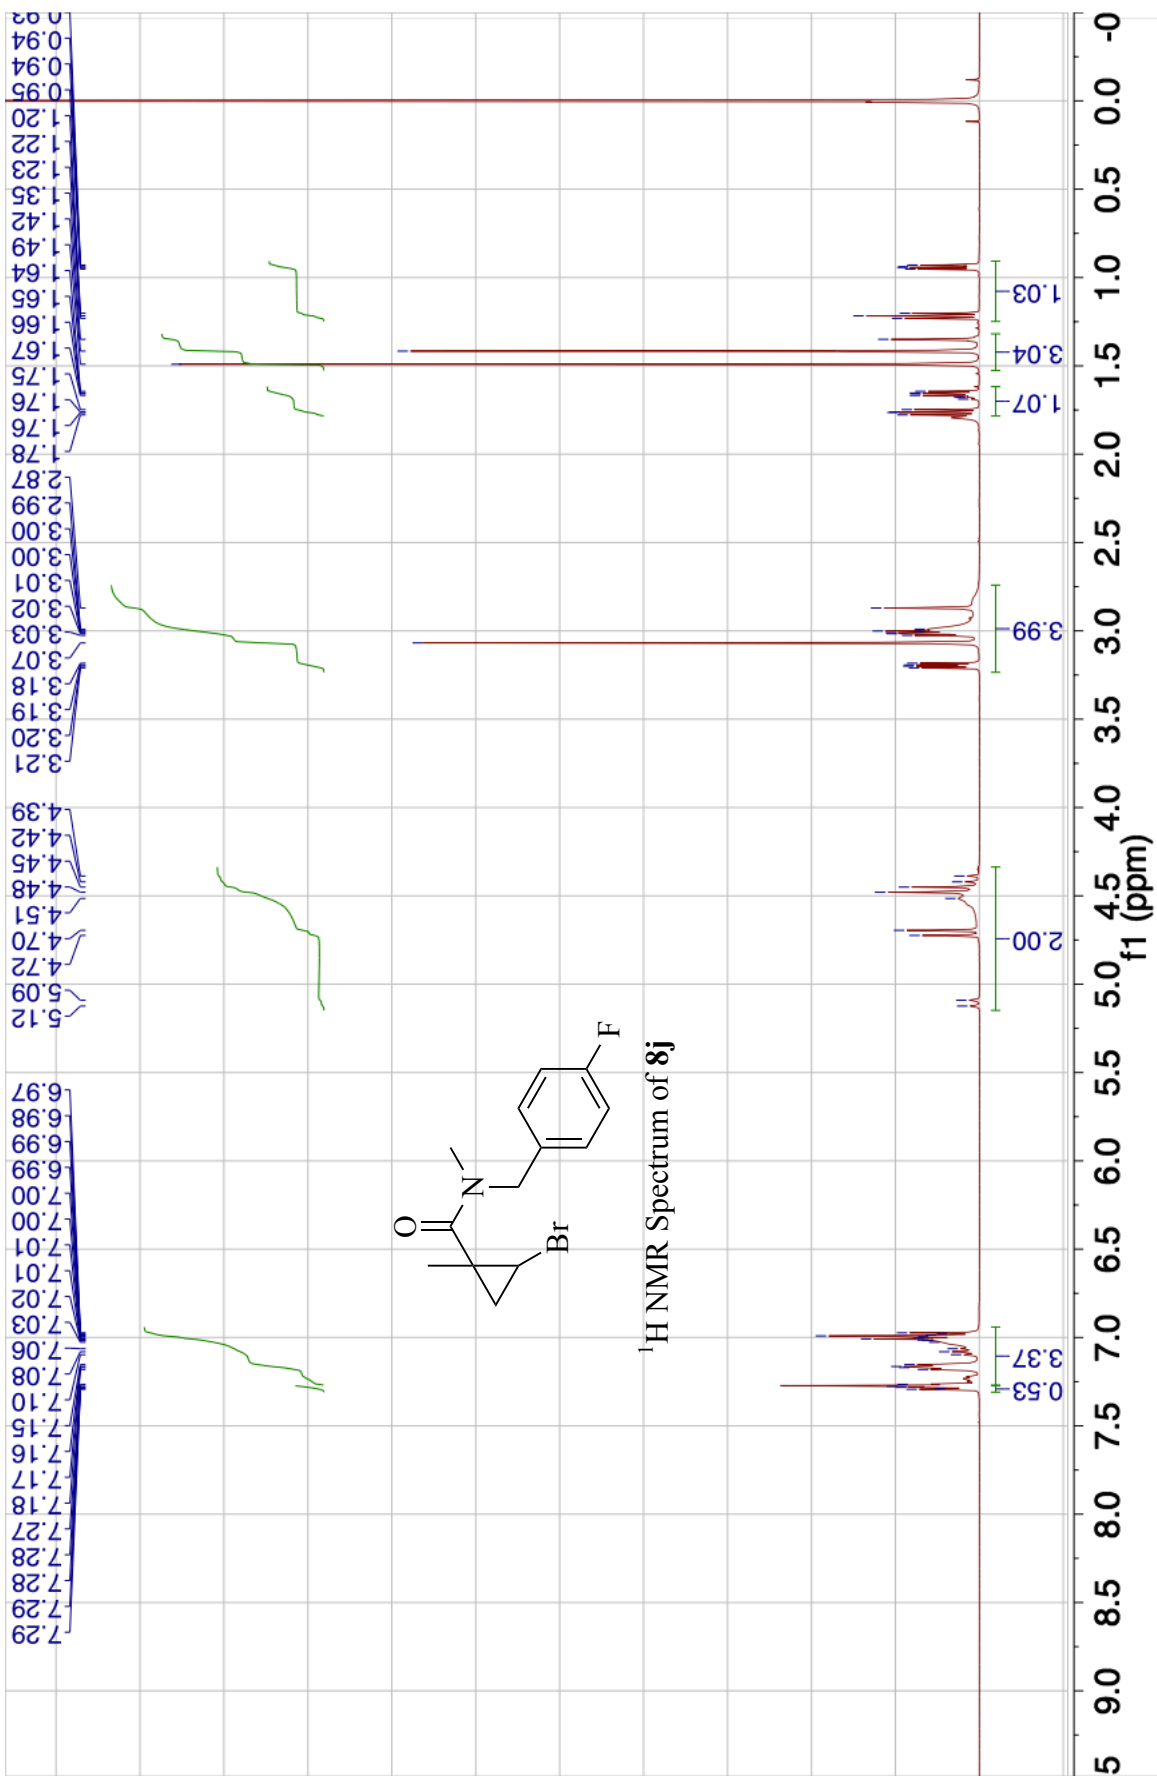

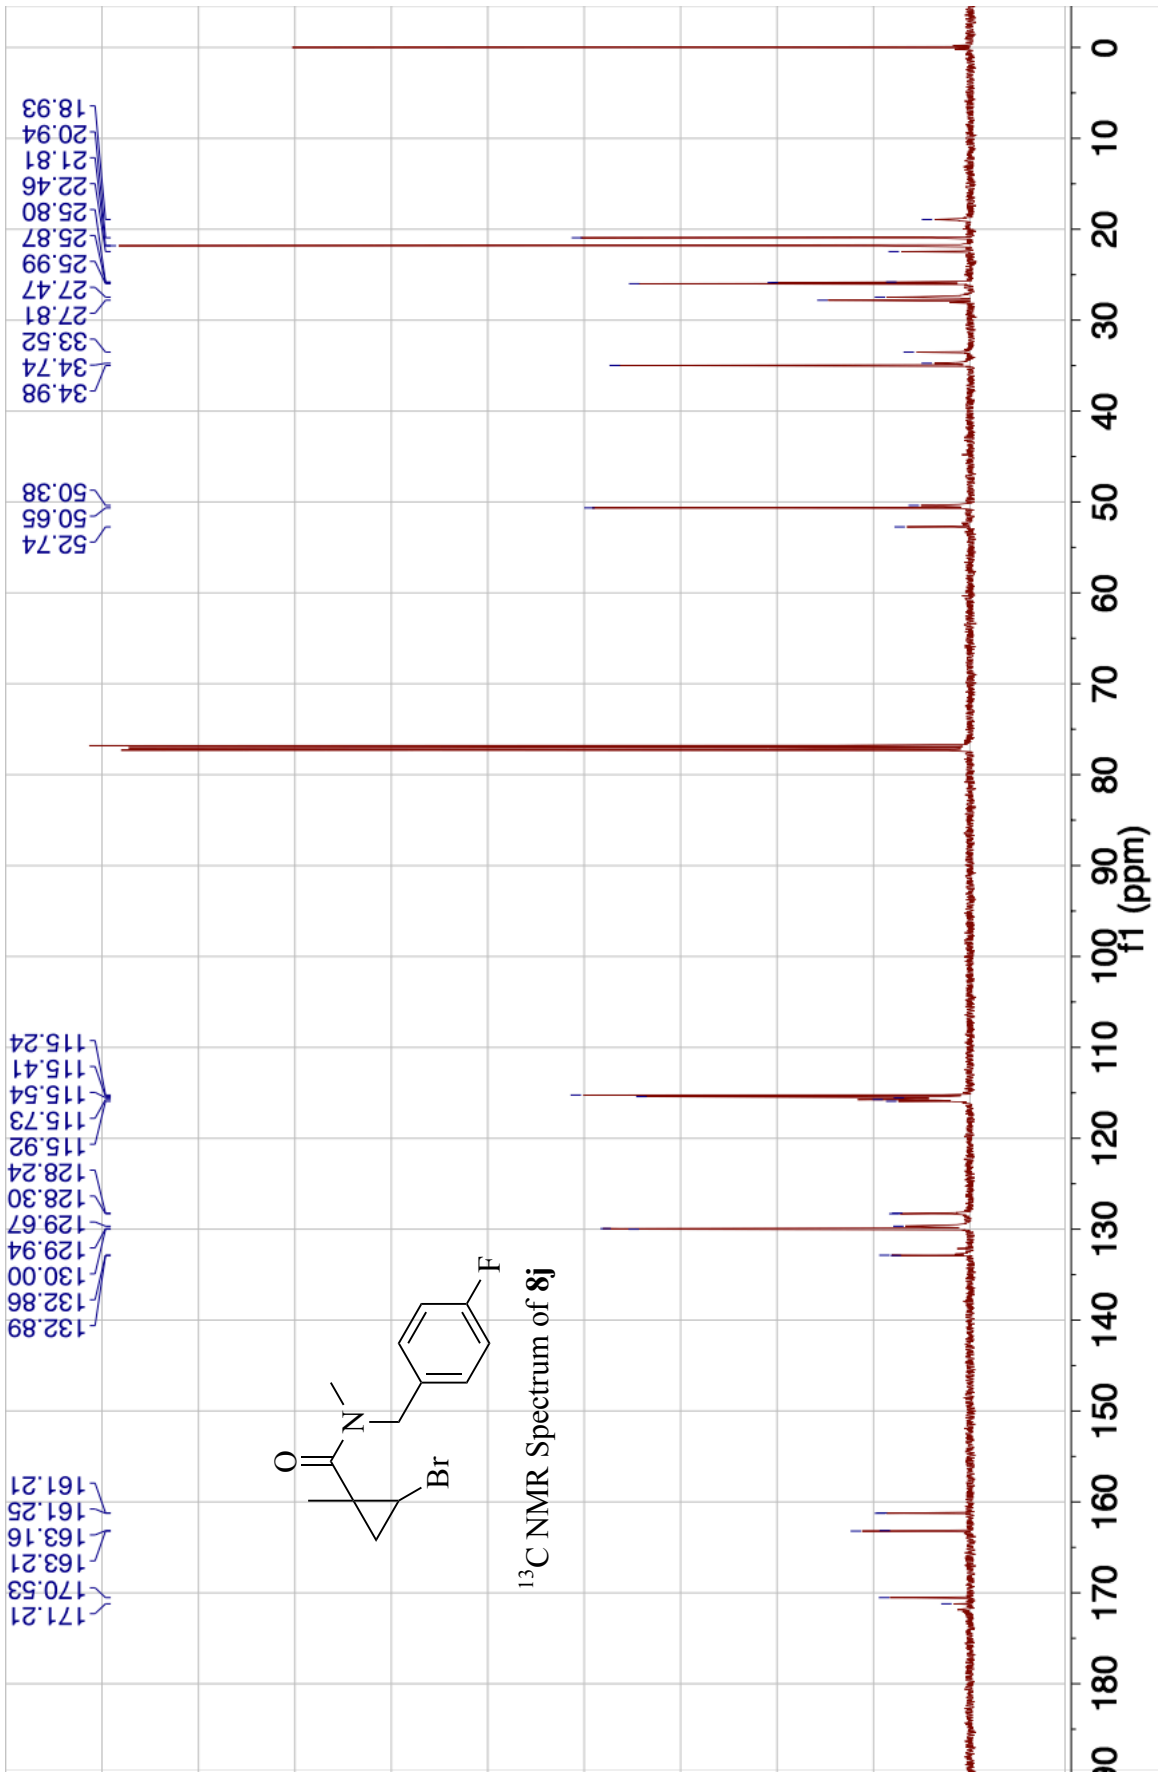

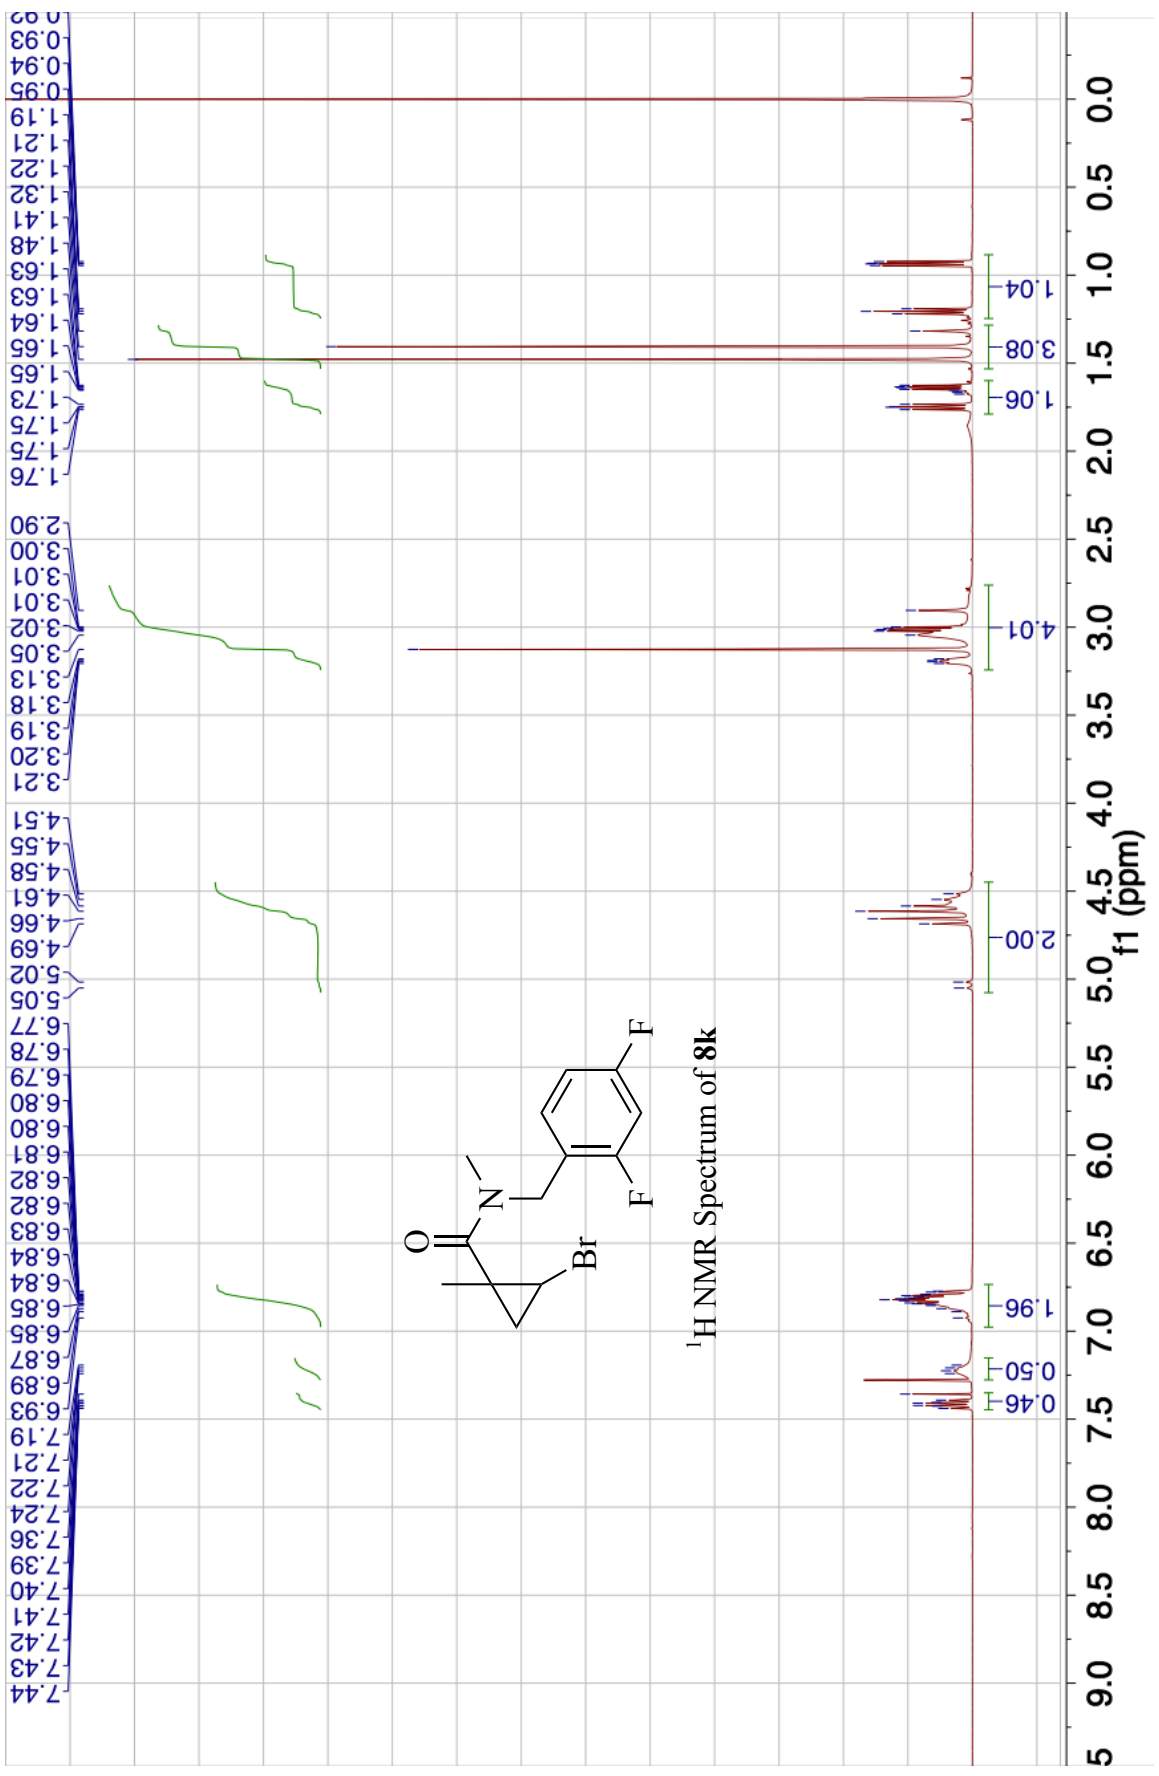

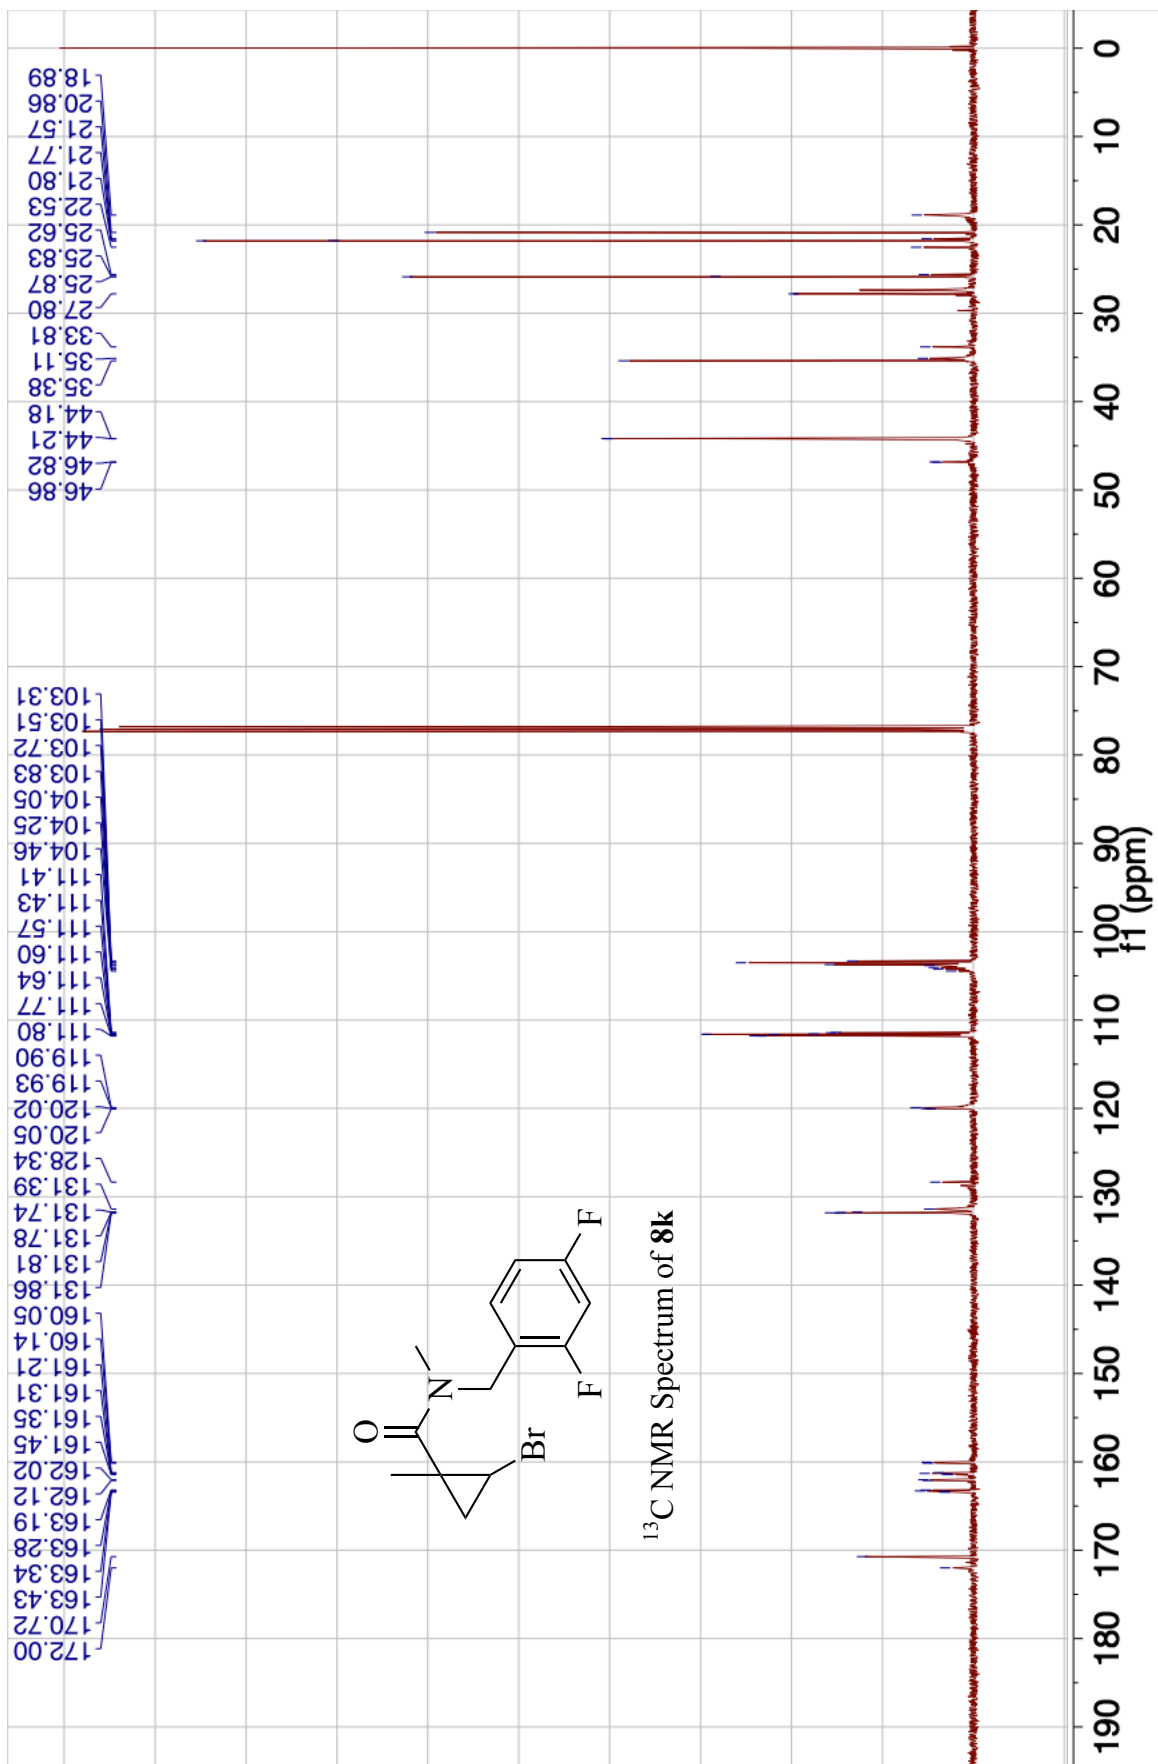

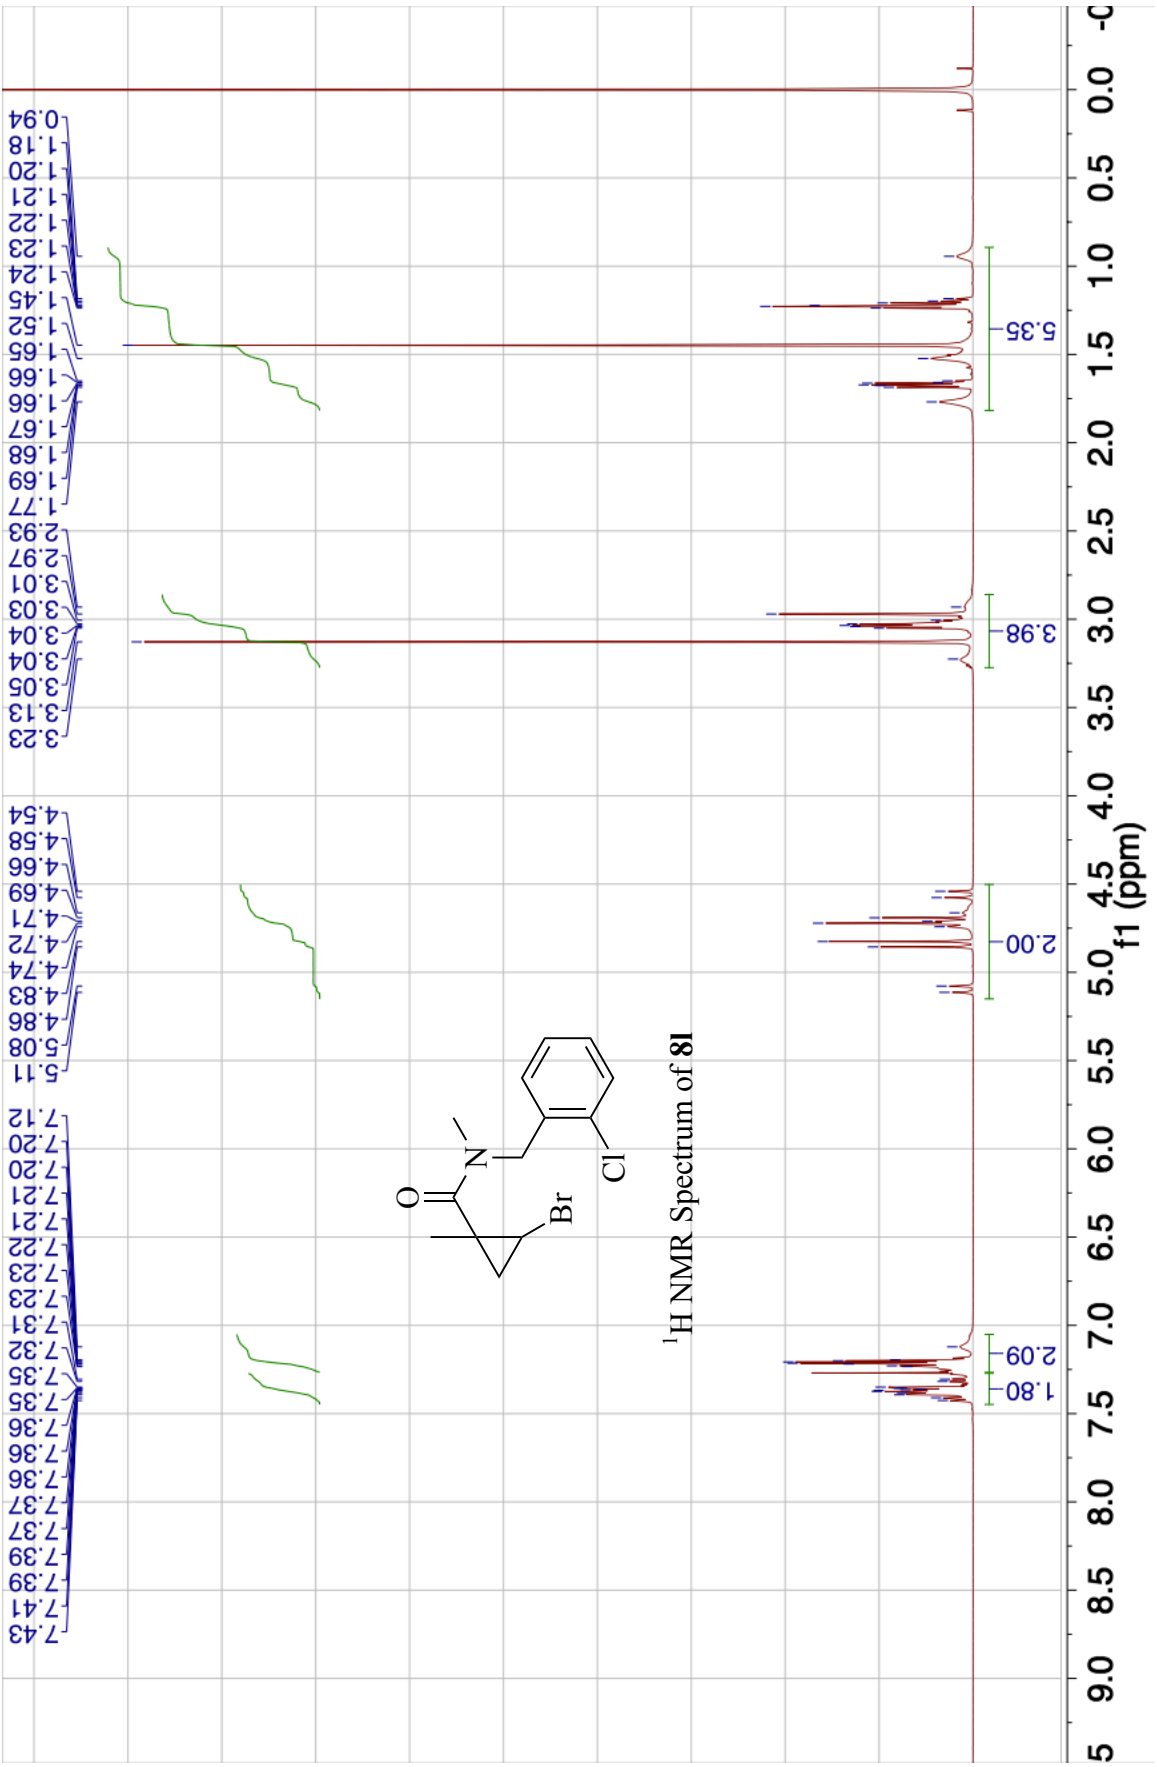



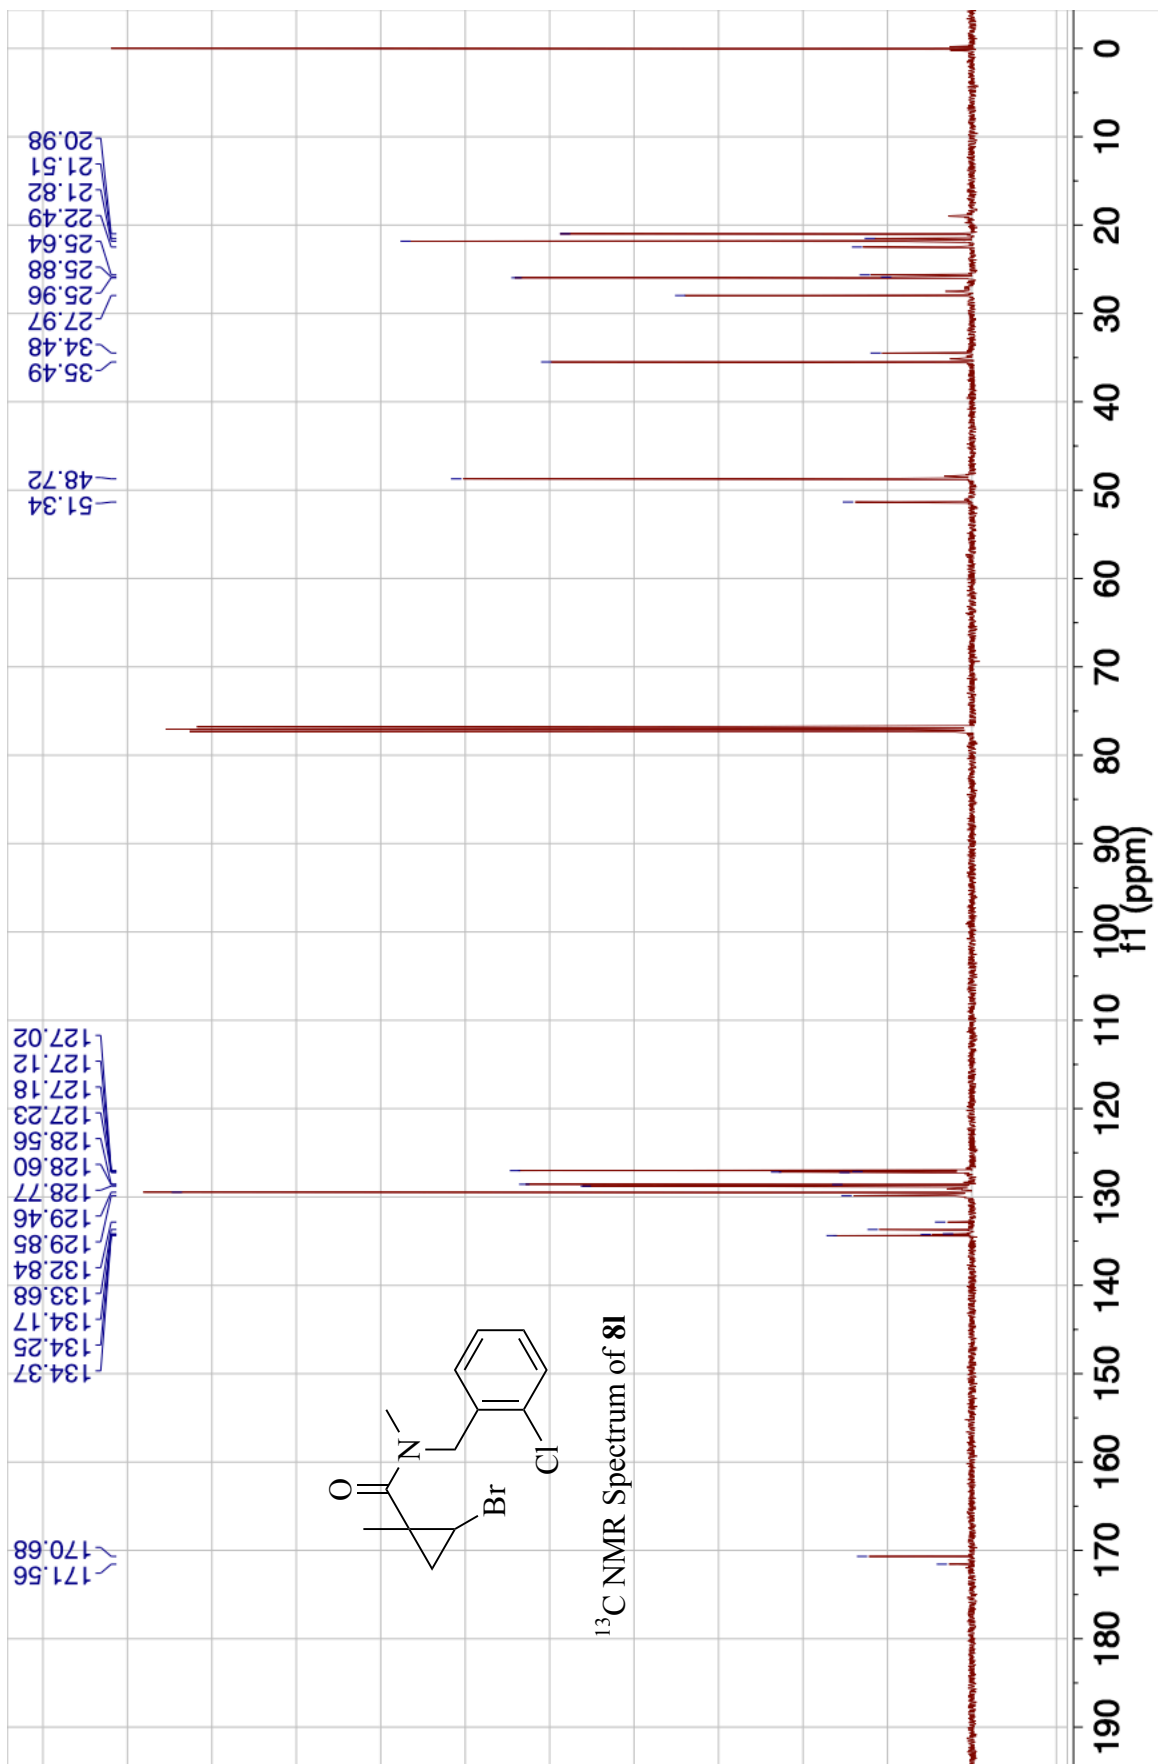

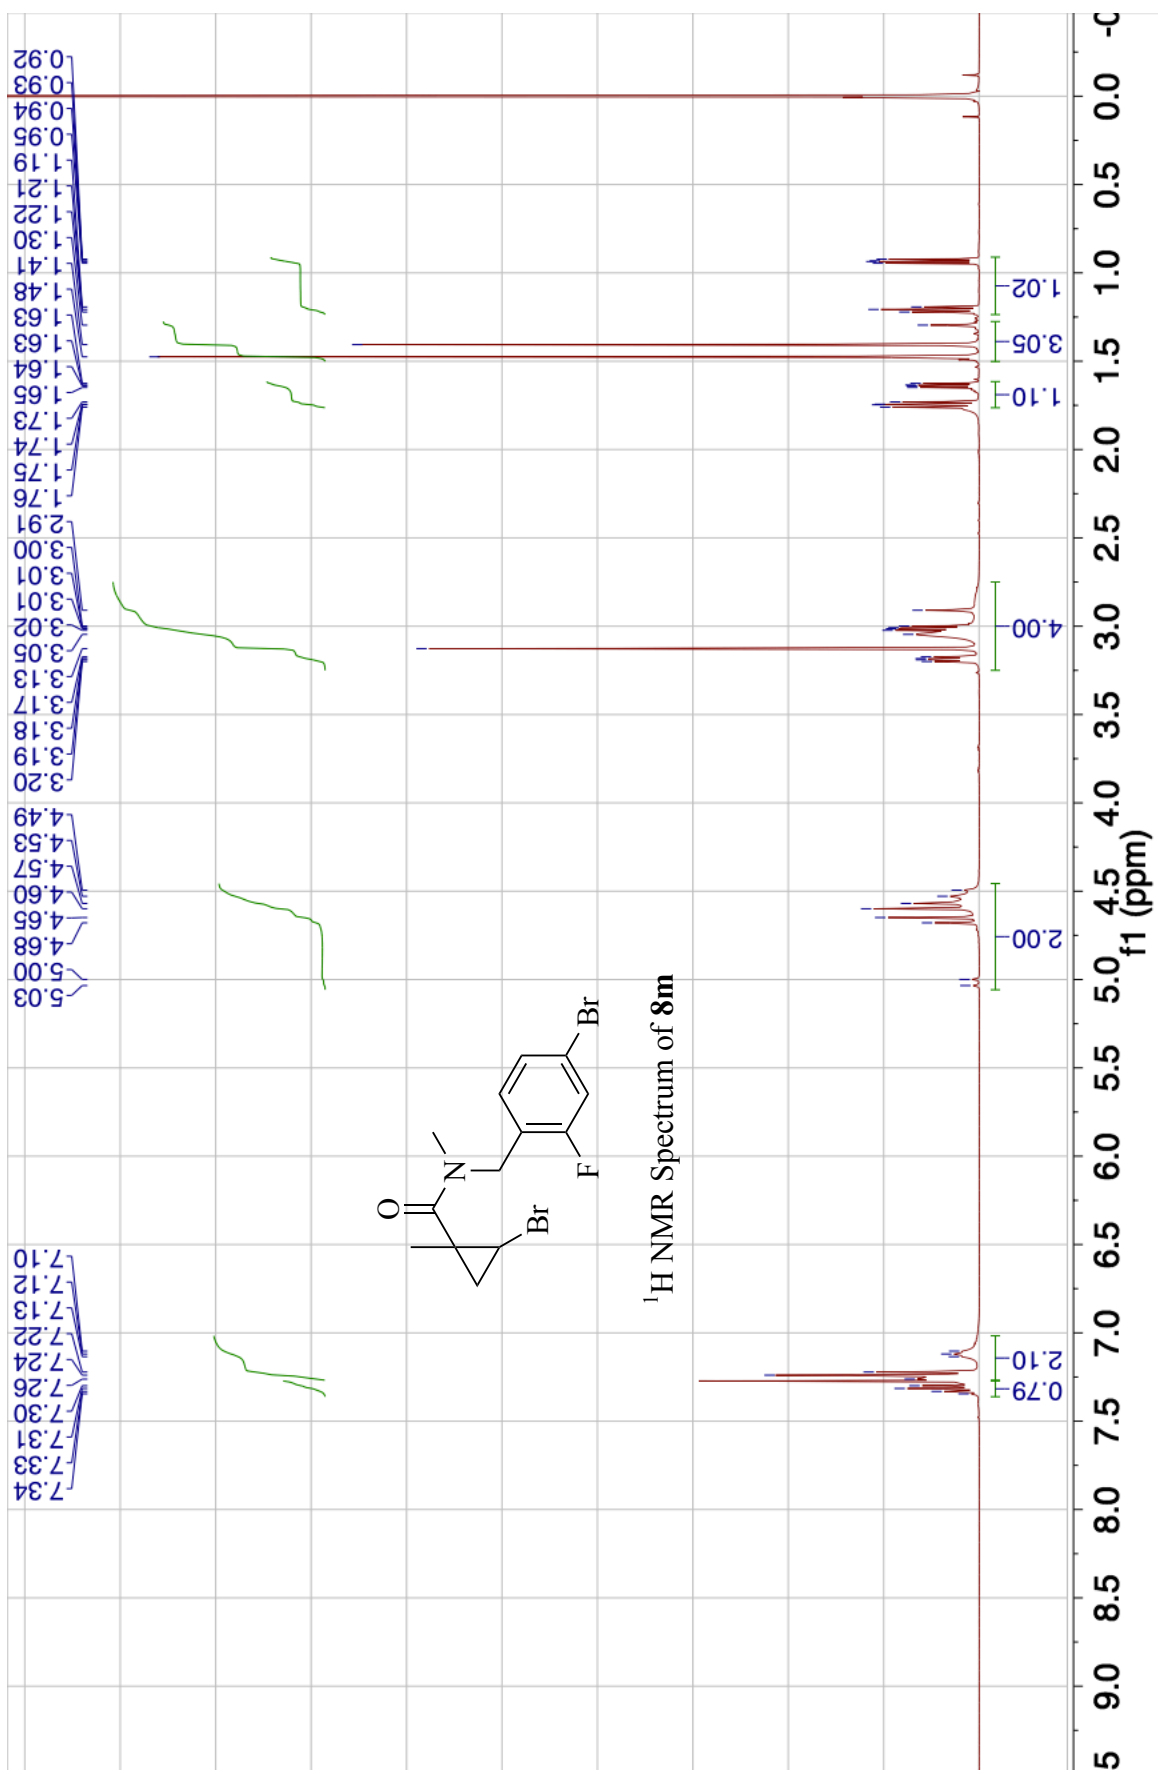

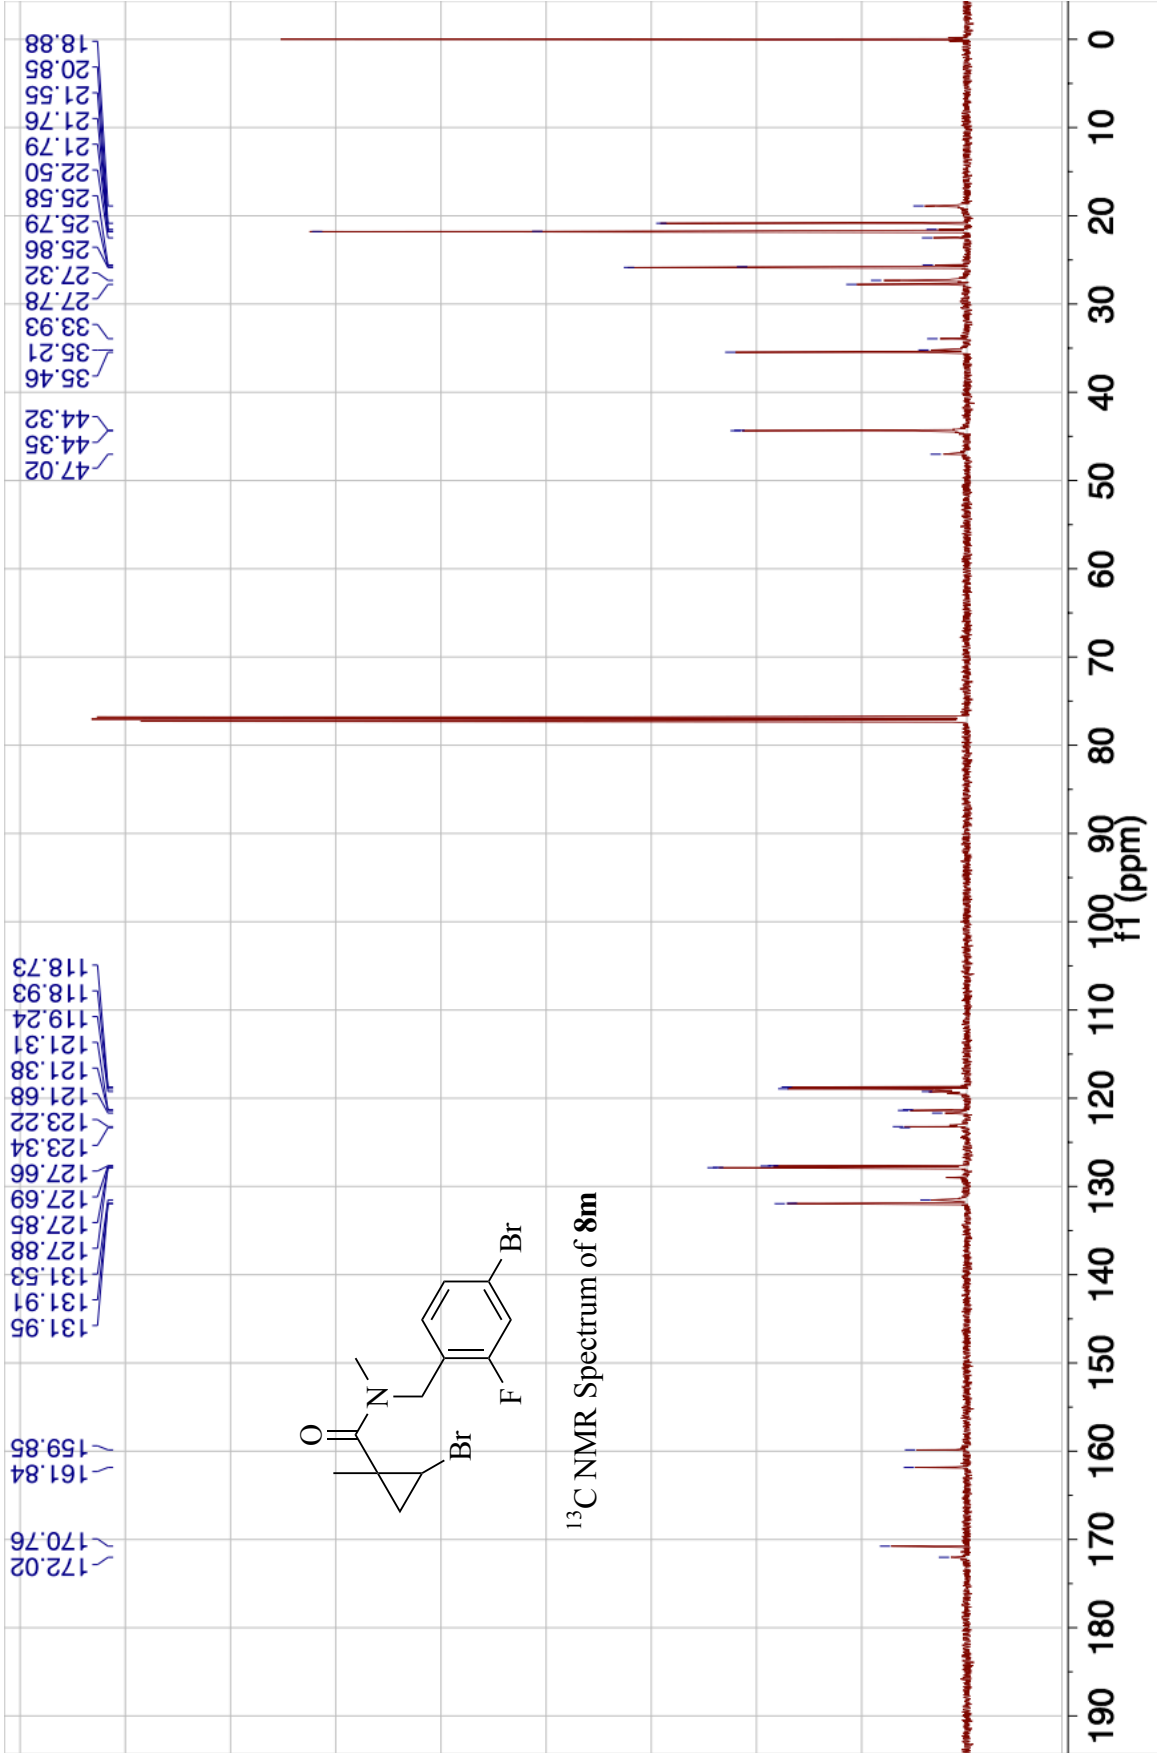

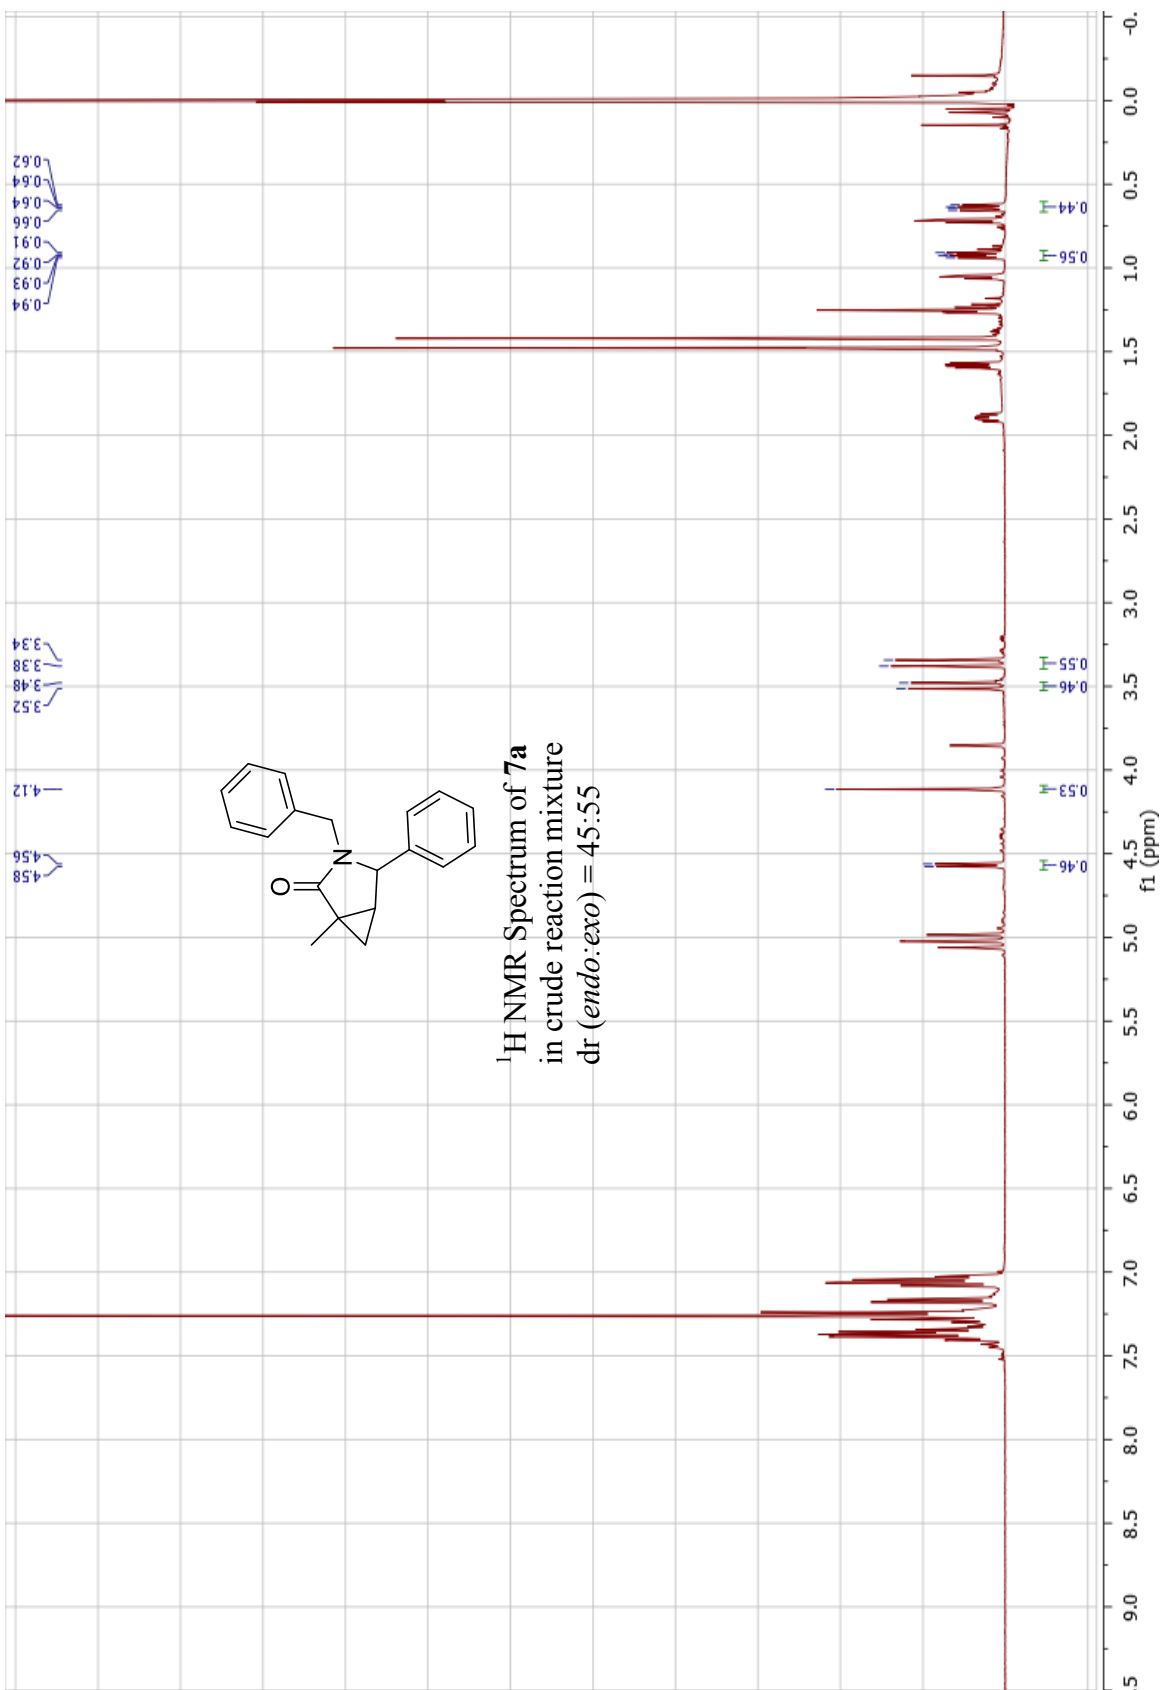

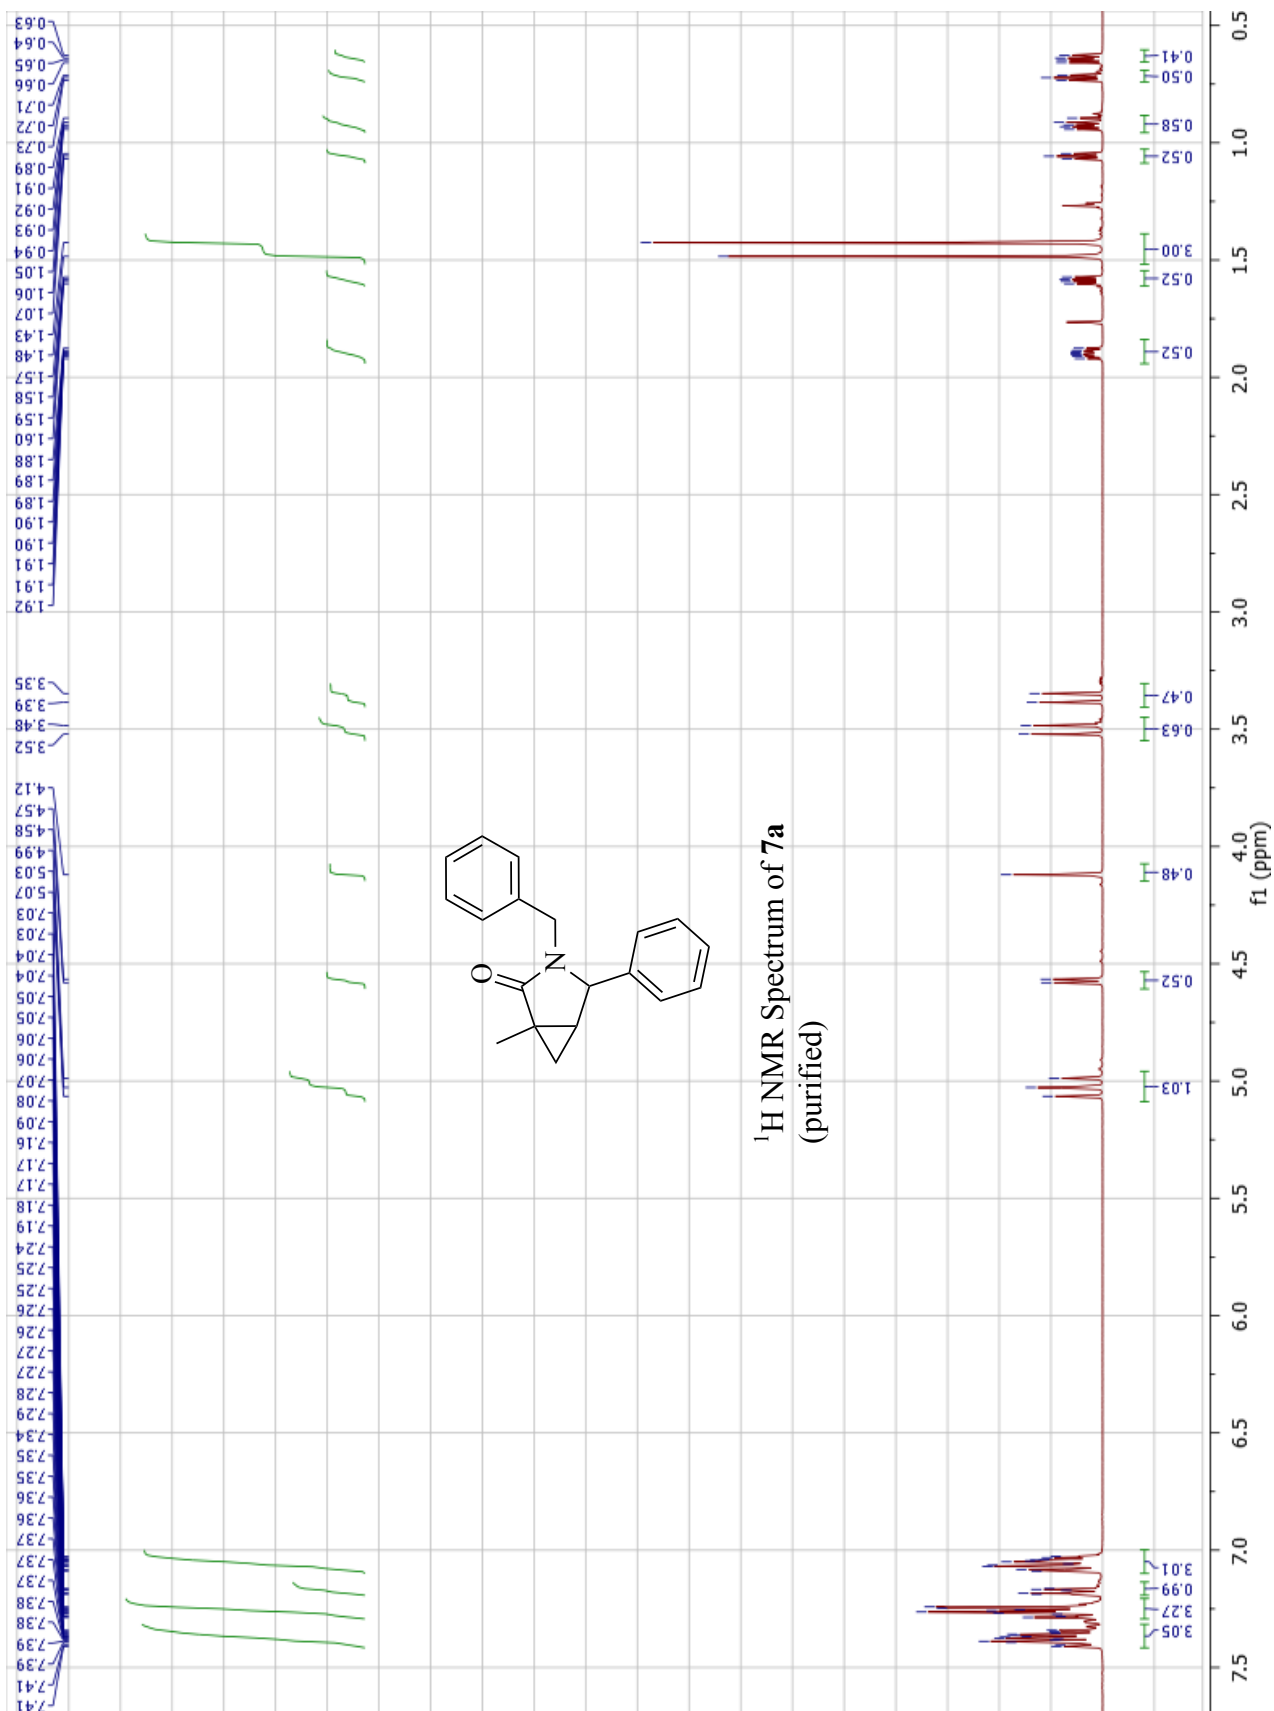

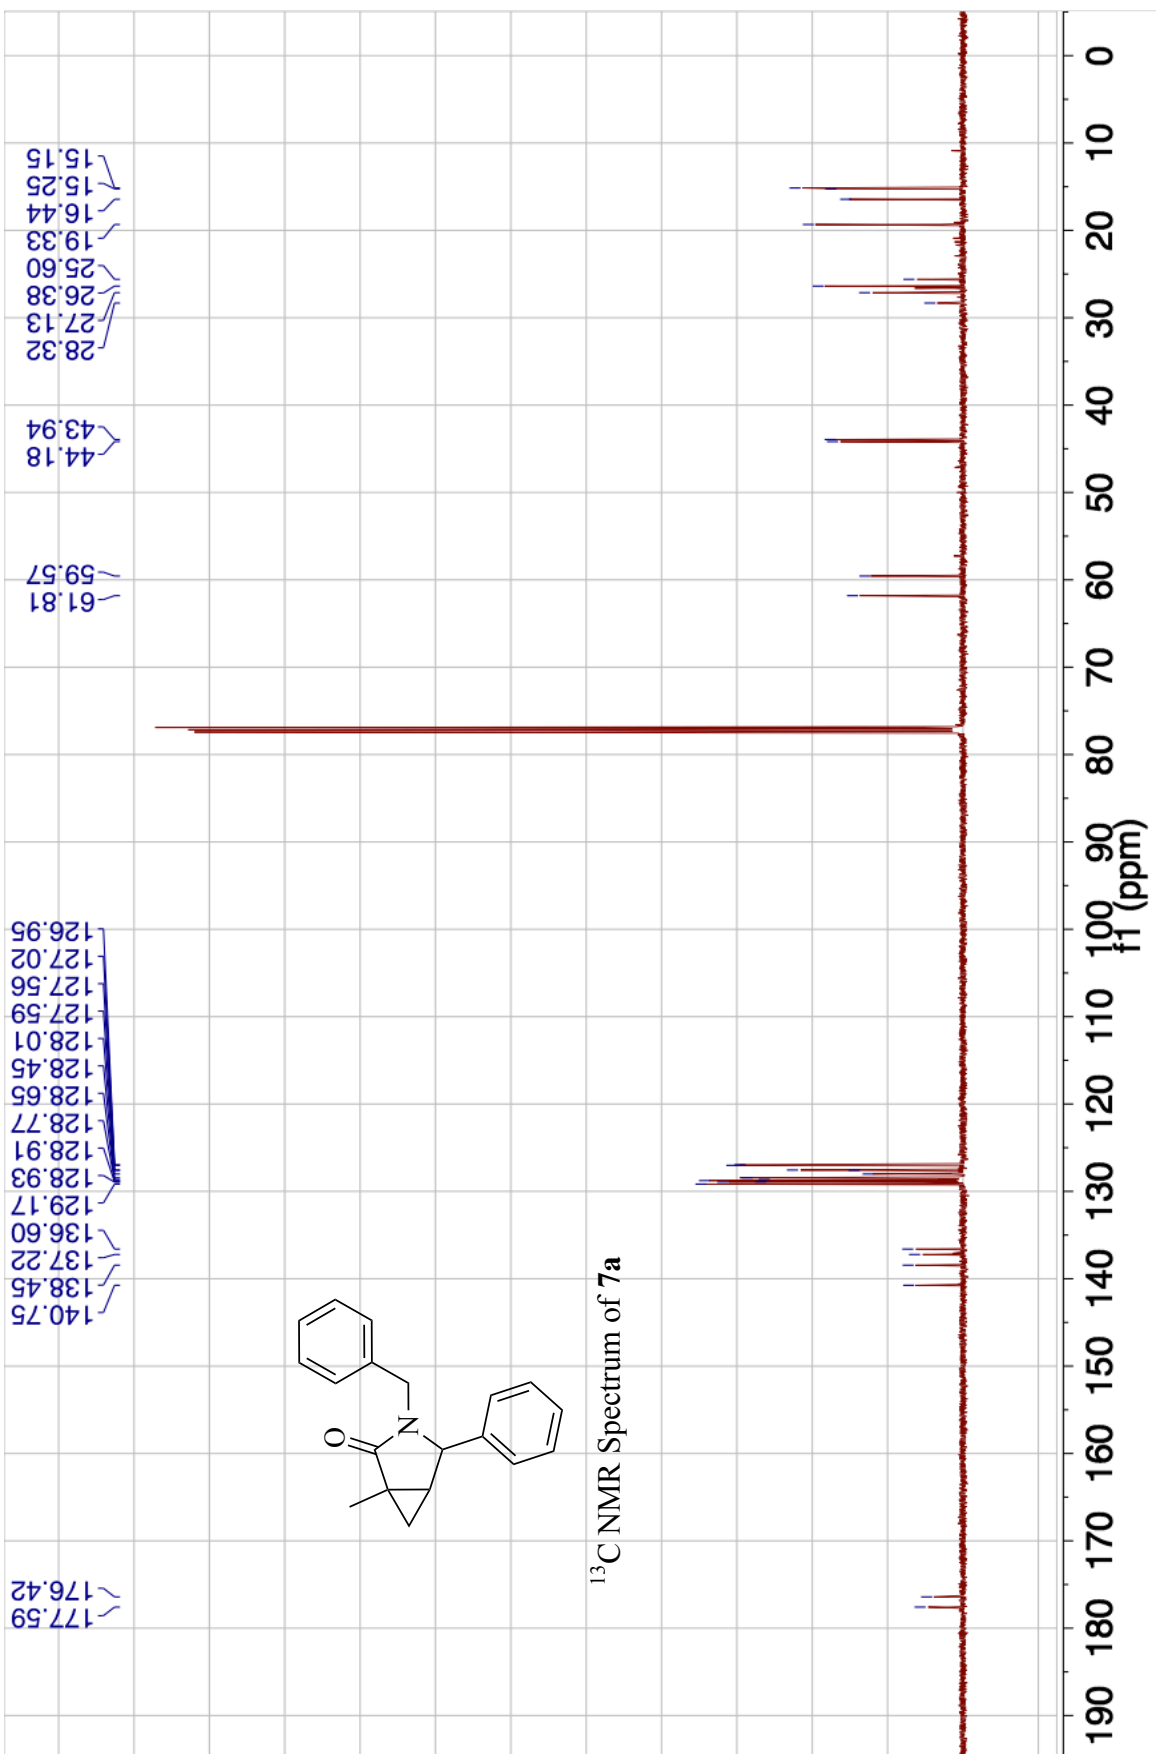

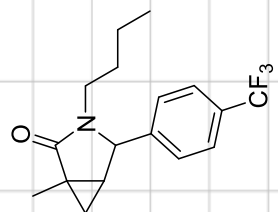

<sup>19</sup>F NMR Spectrum of **7d**  
in crude reaction mixture  
dr (*endo:exo*) = 15:85

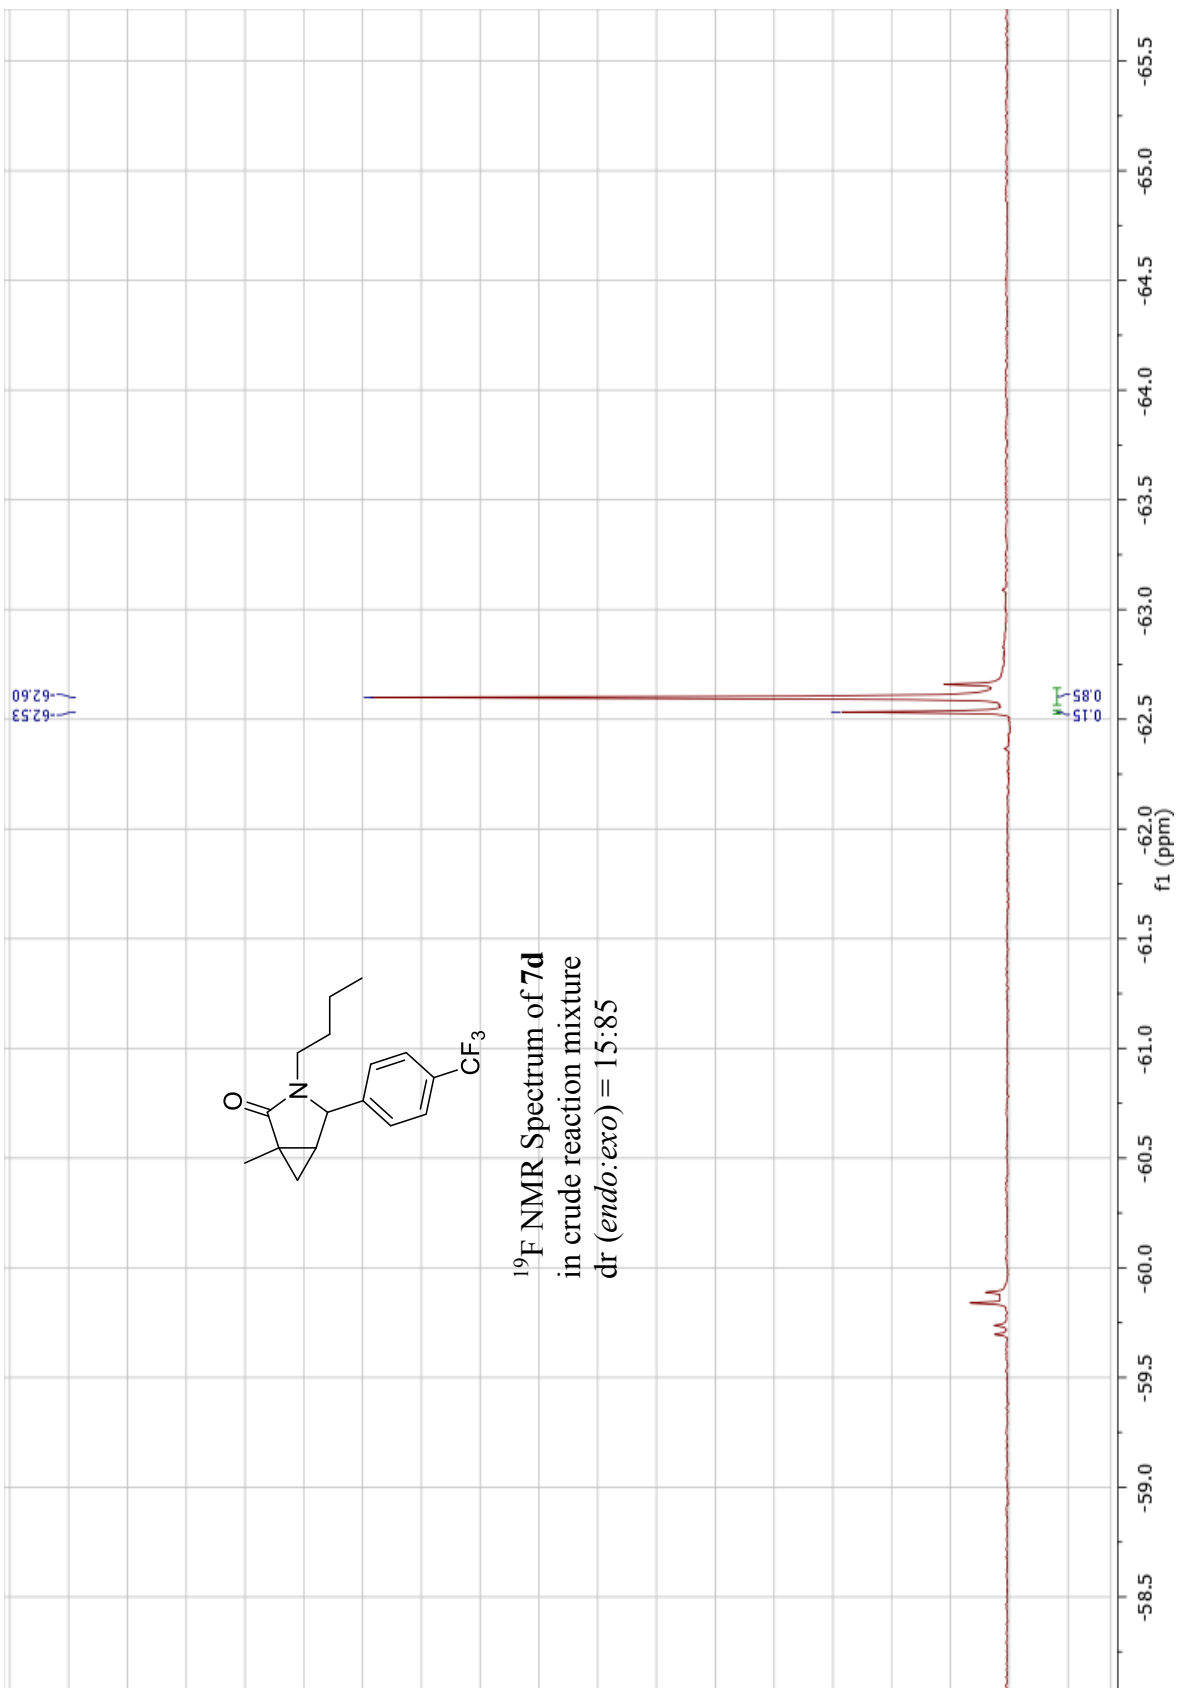

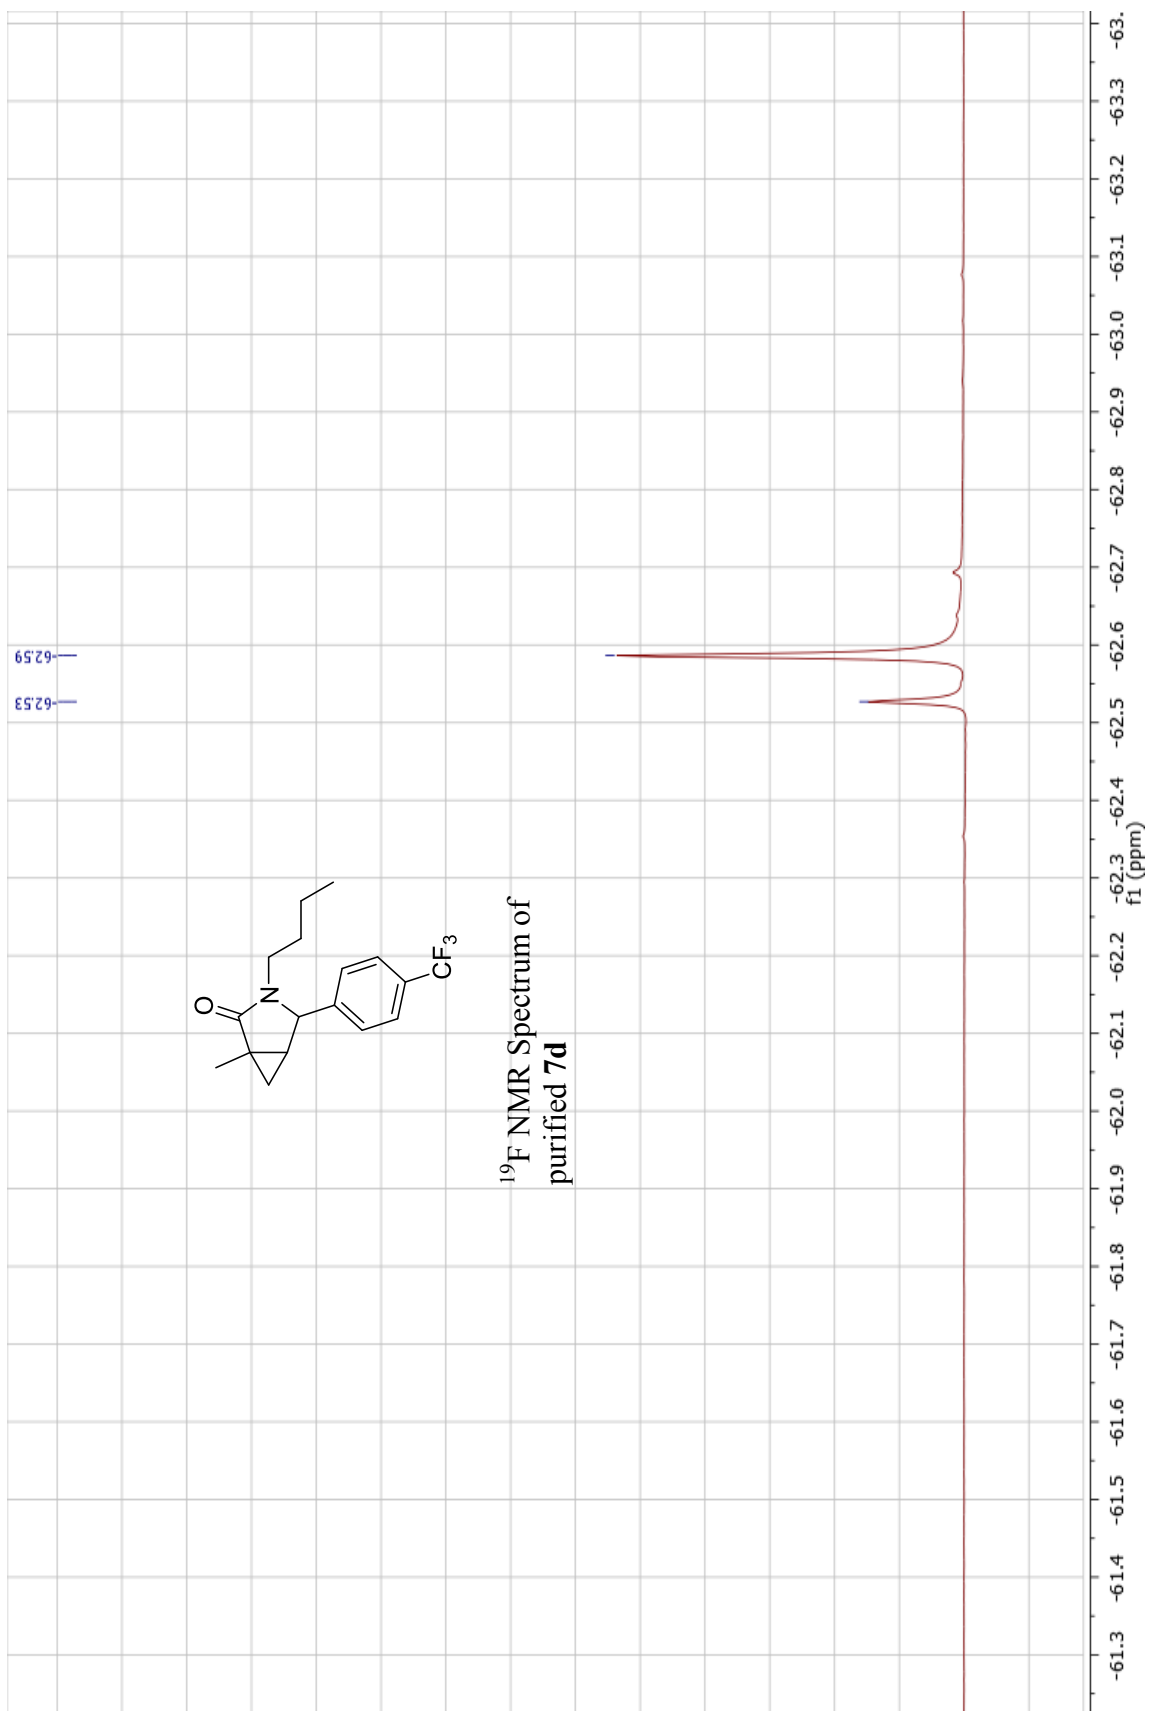



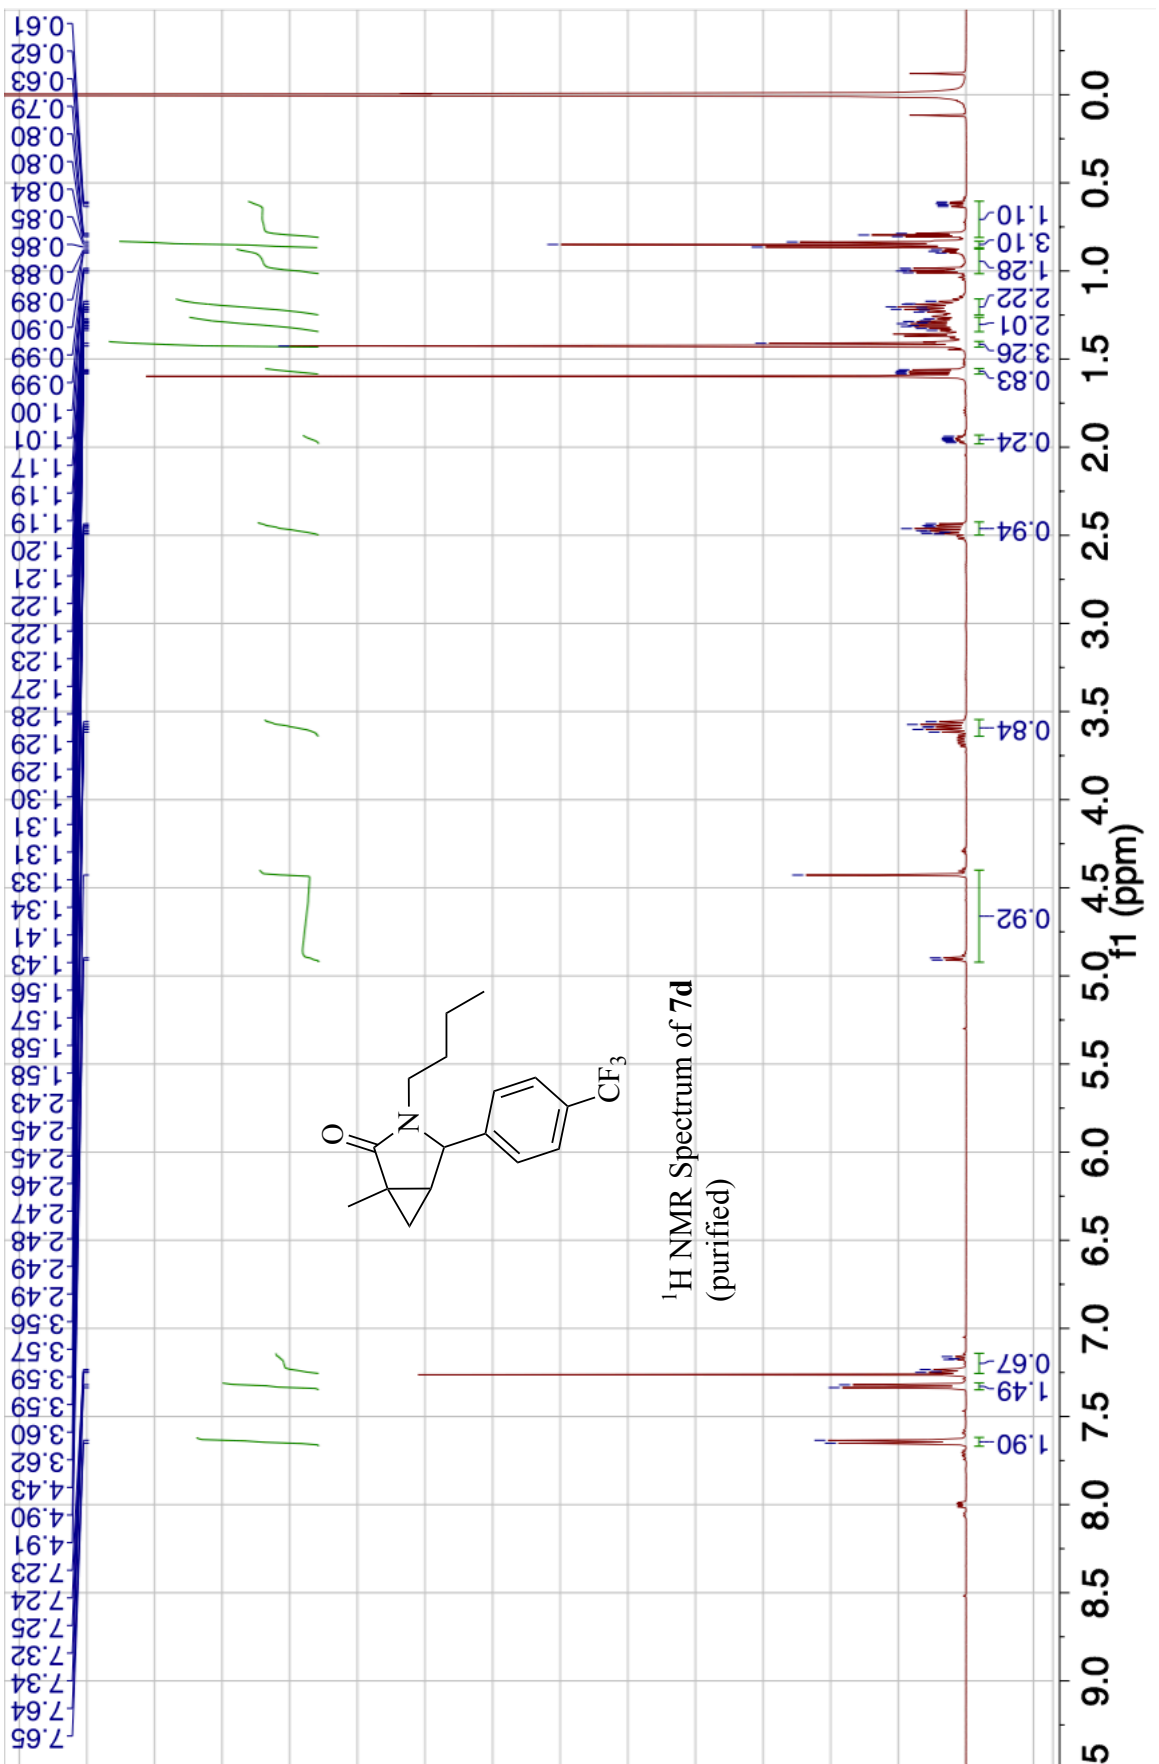

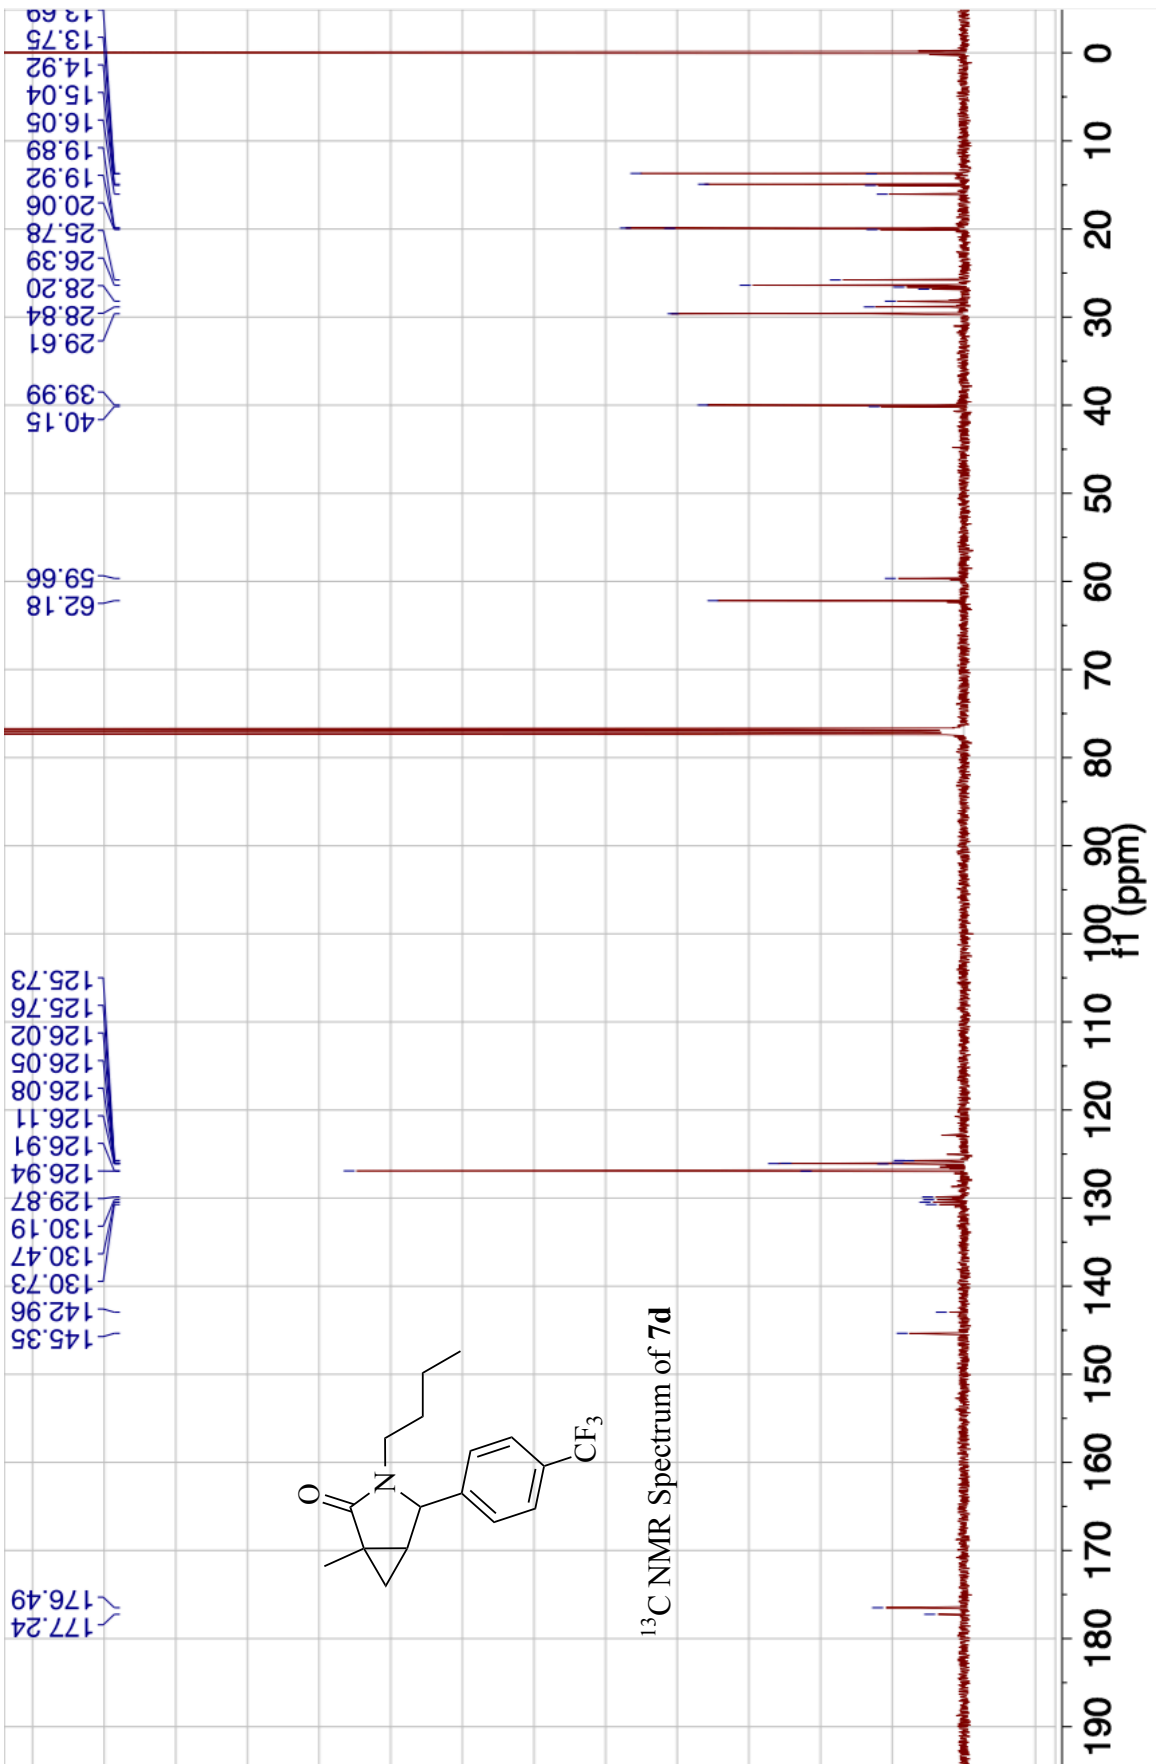

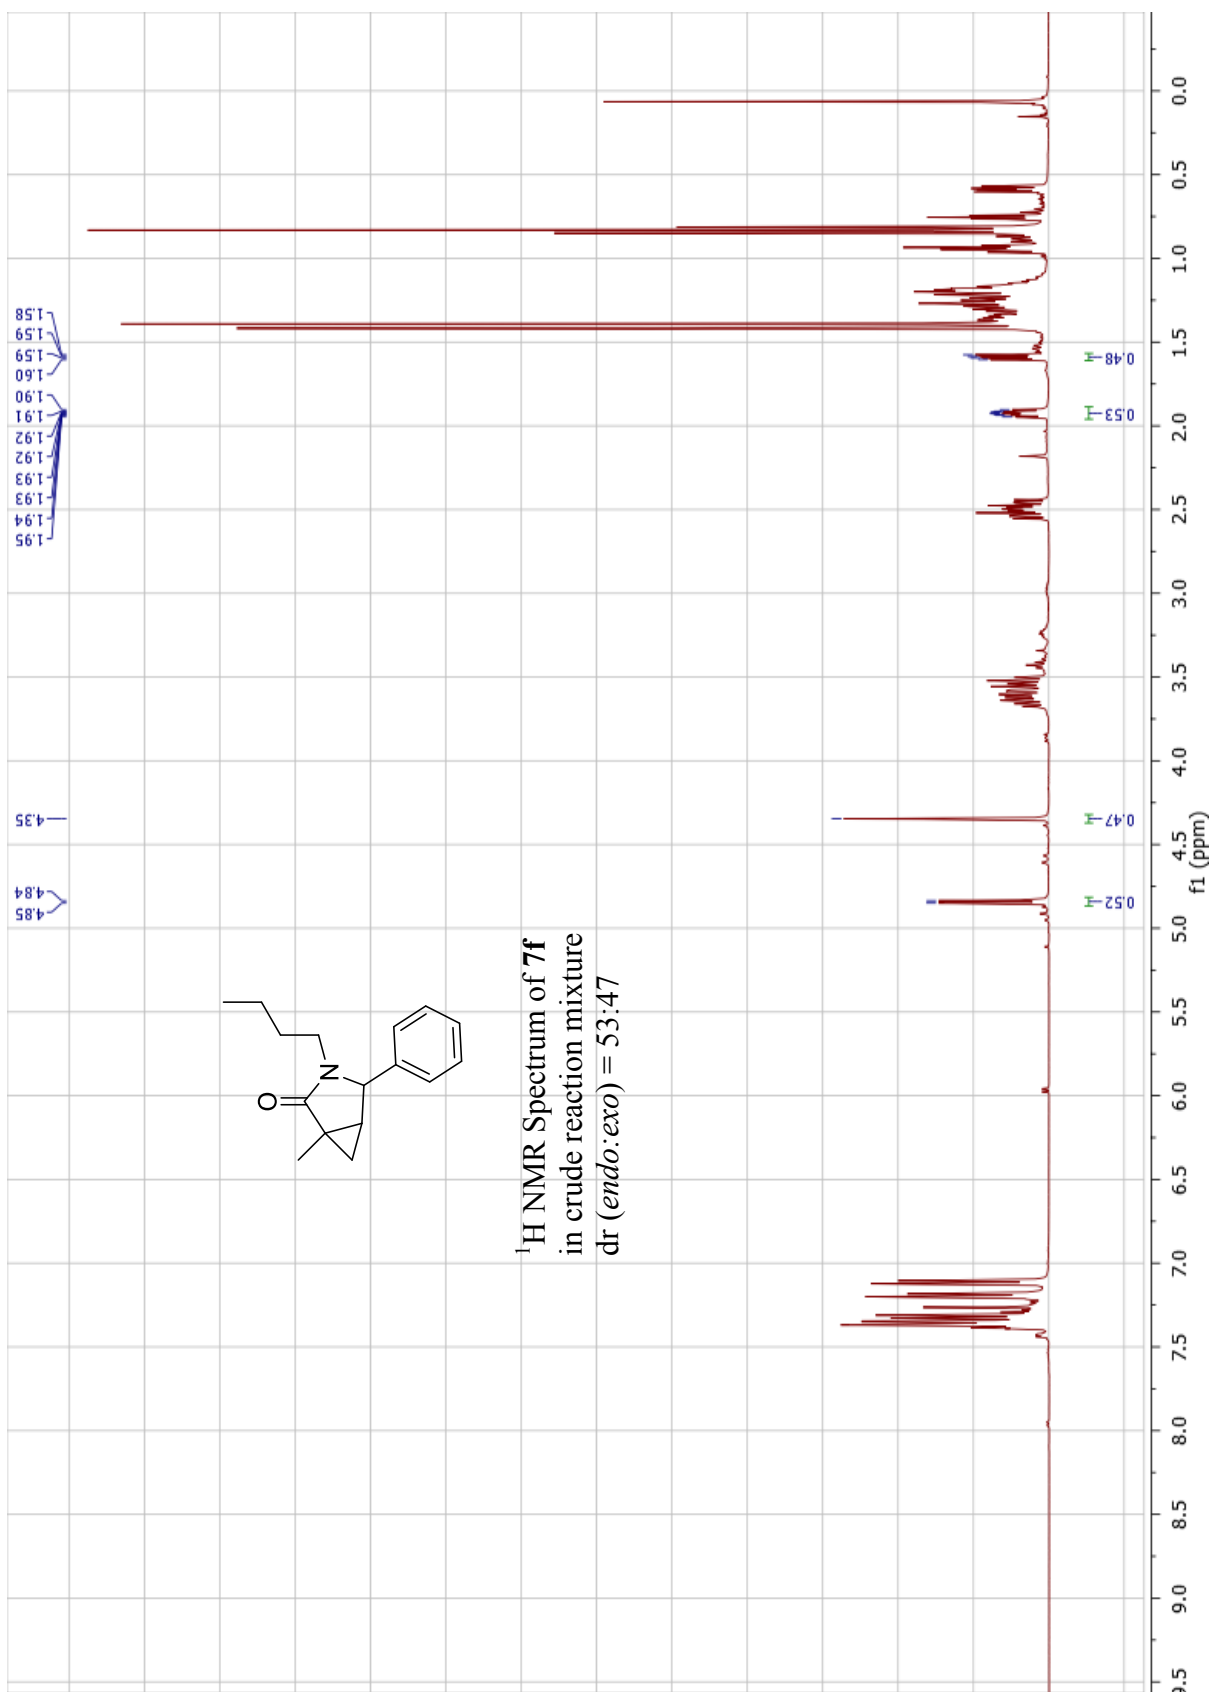

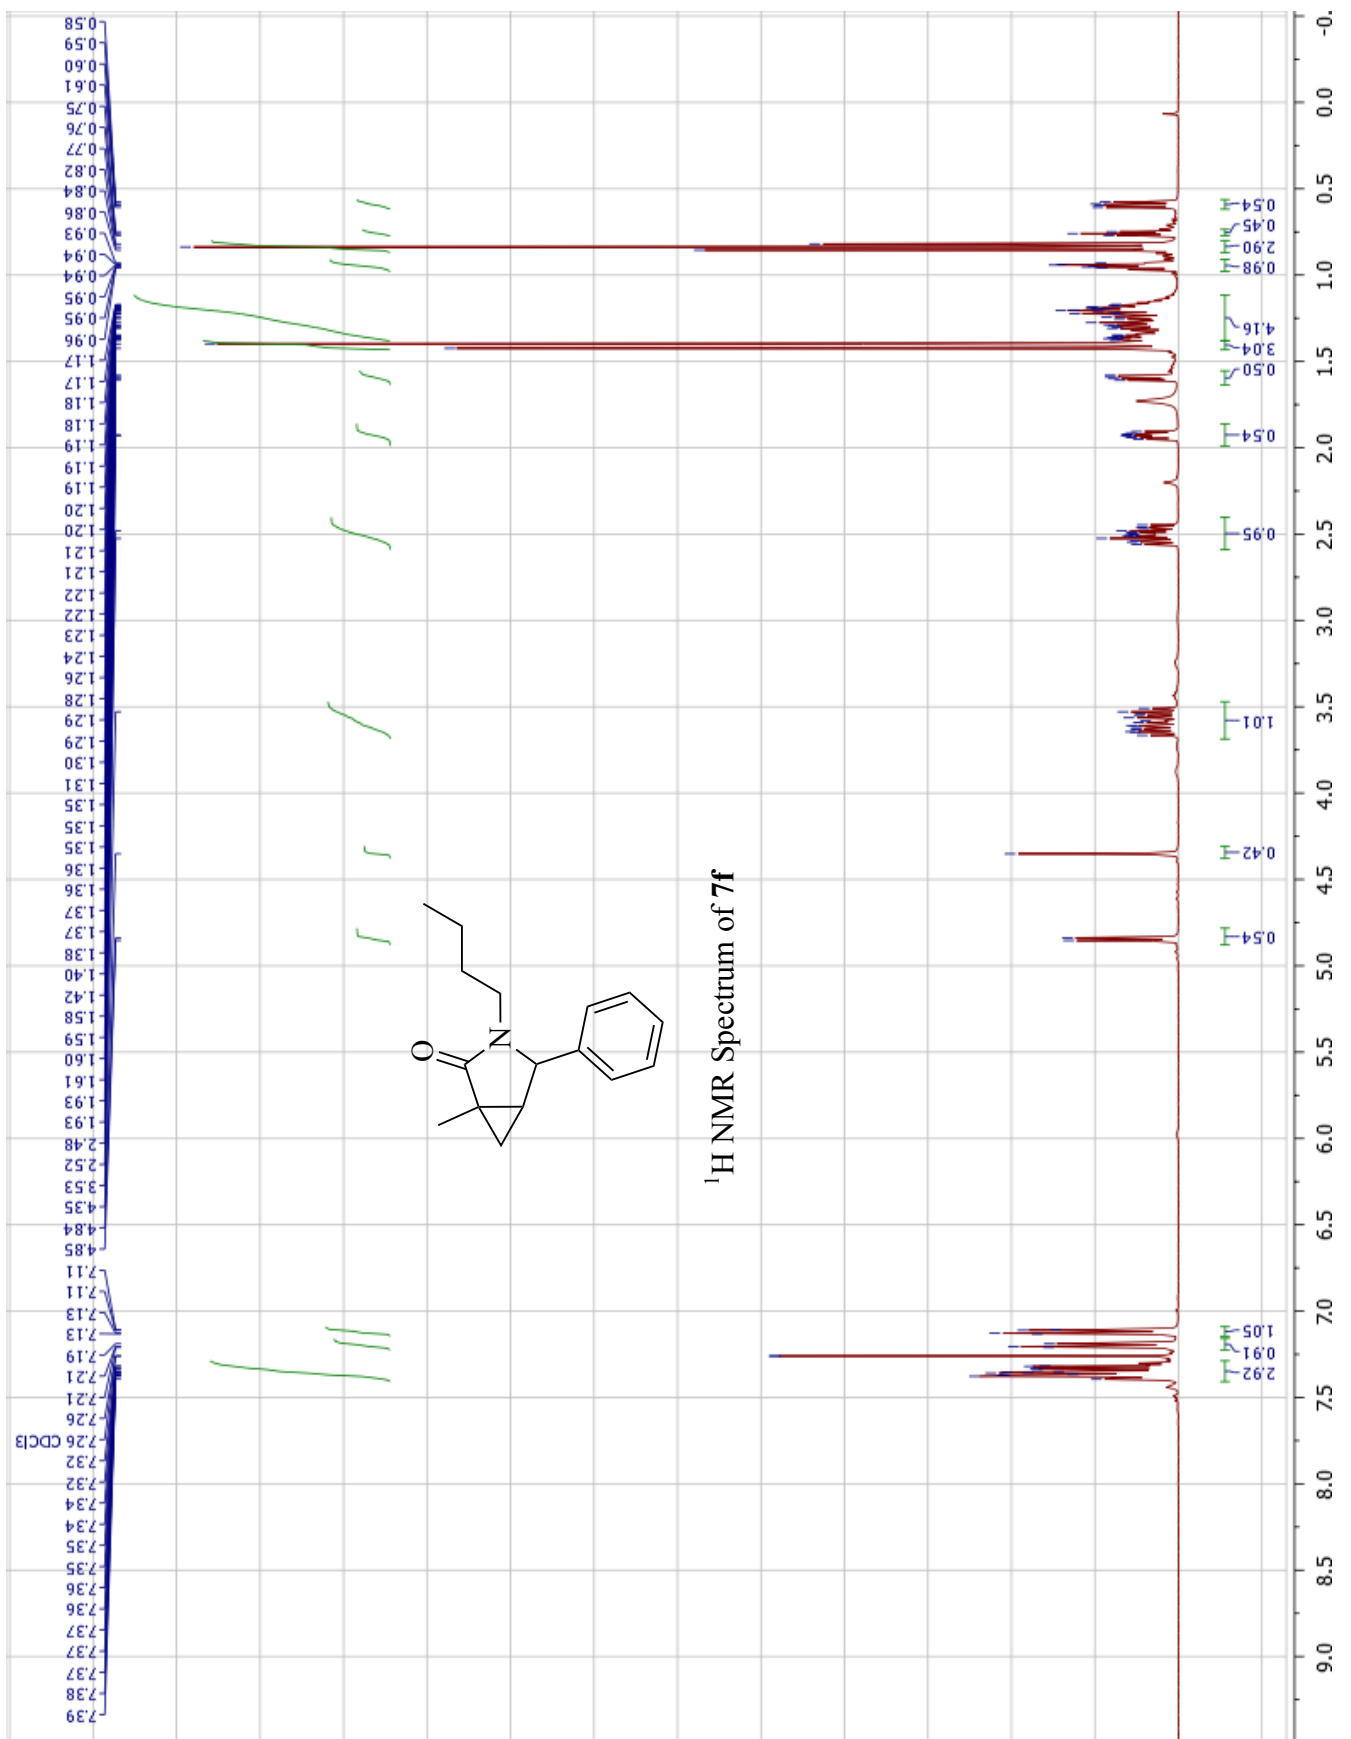

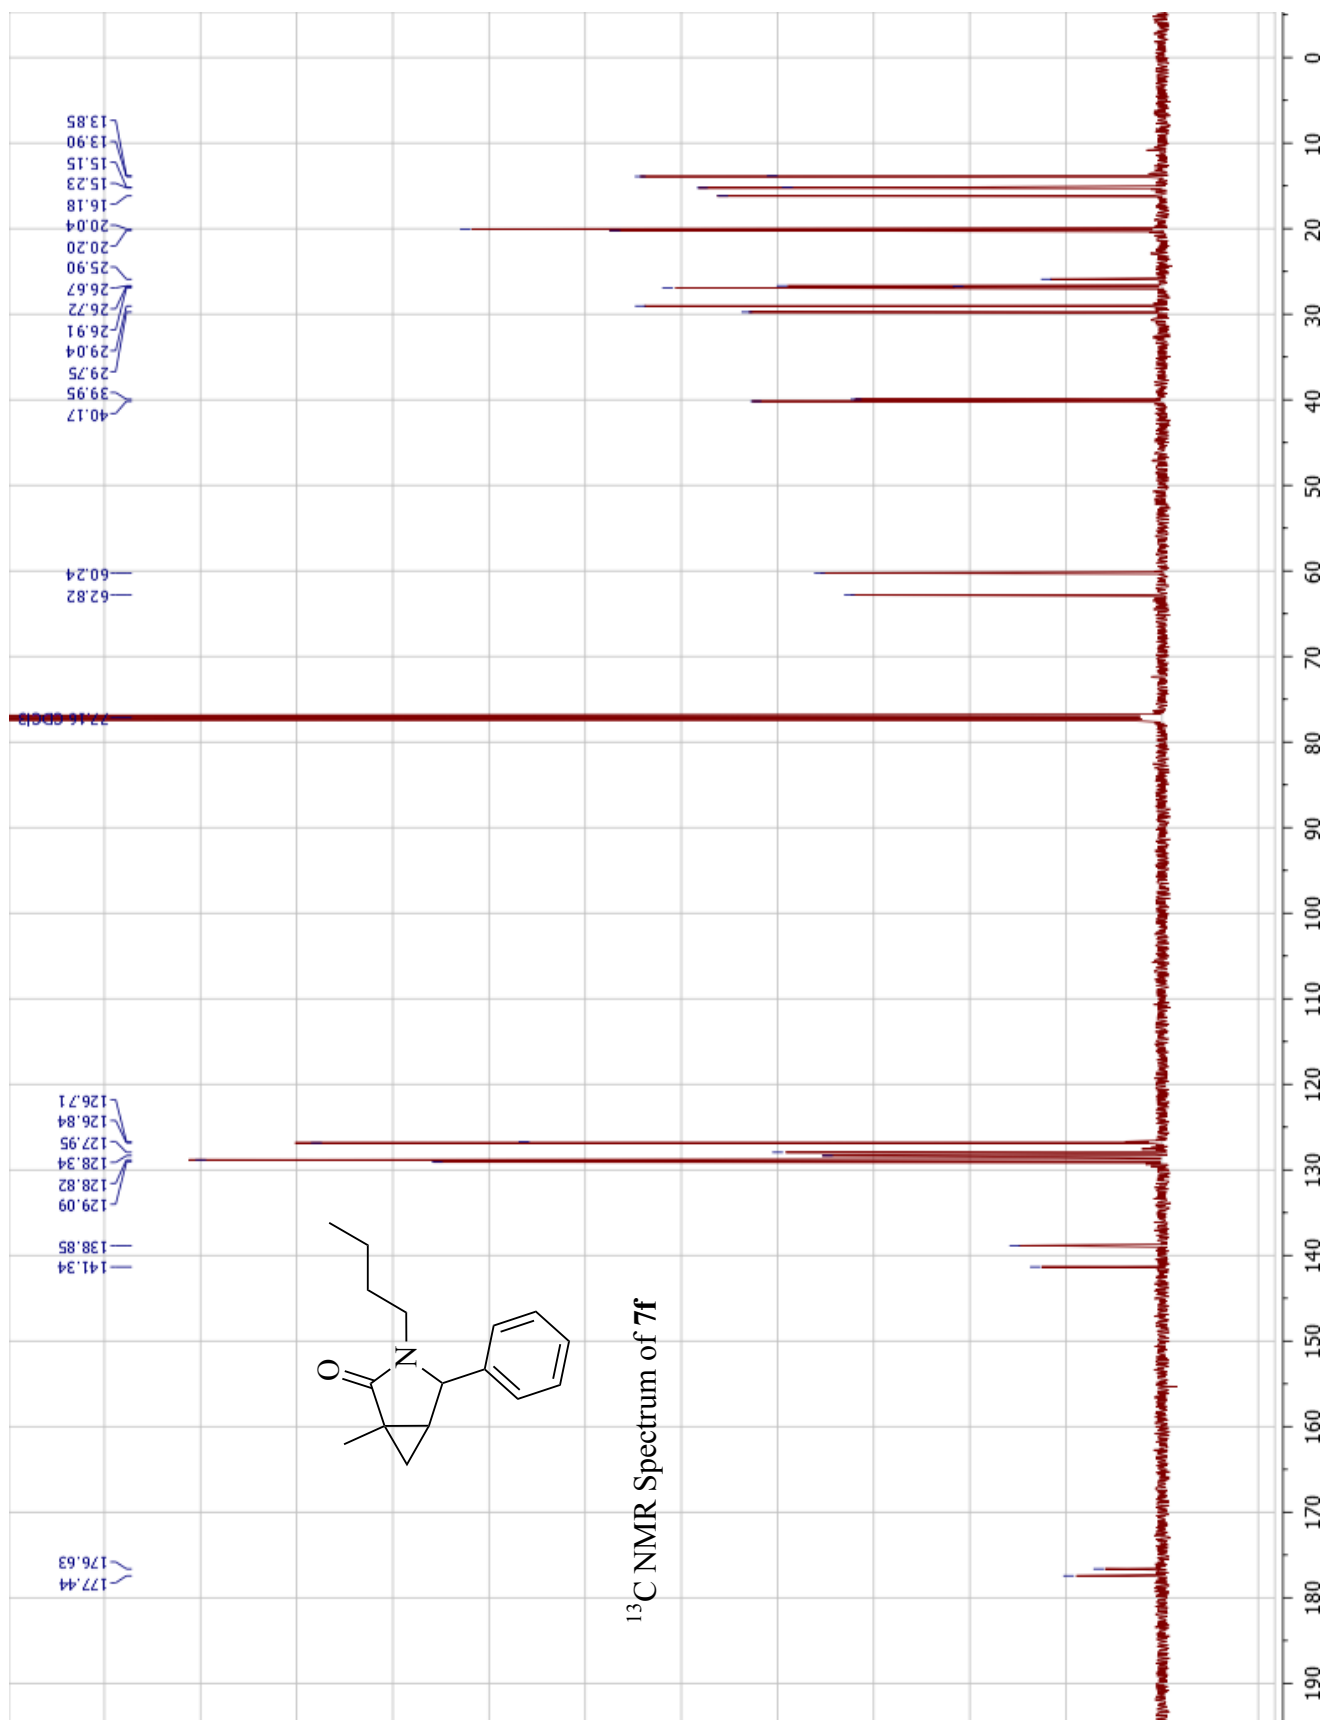

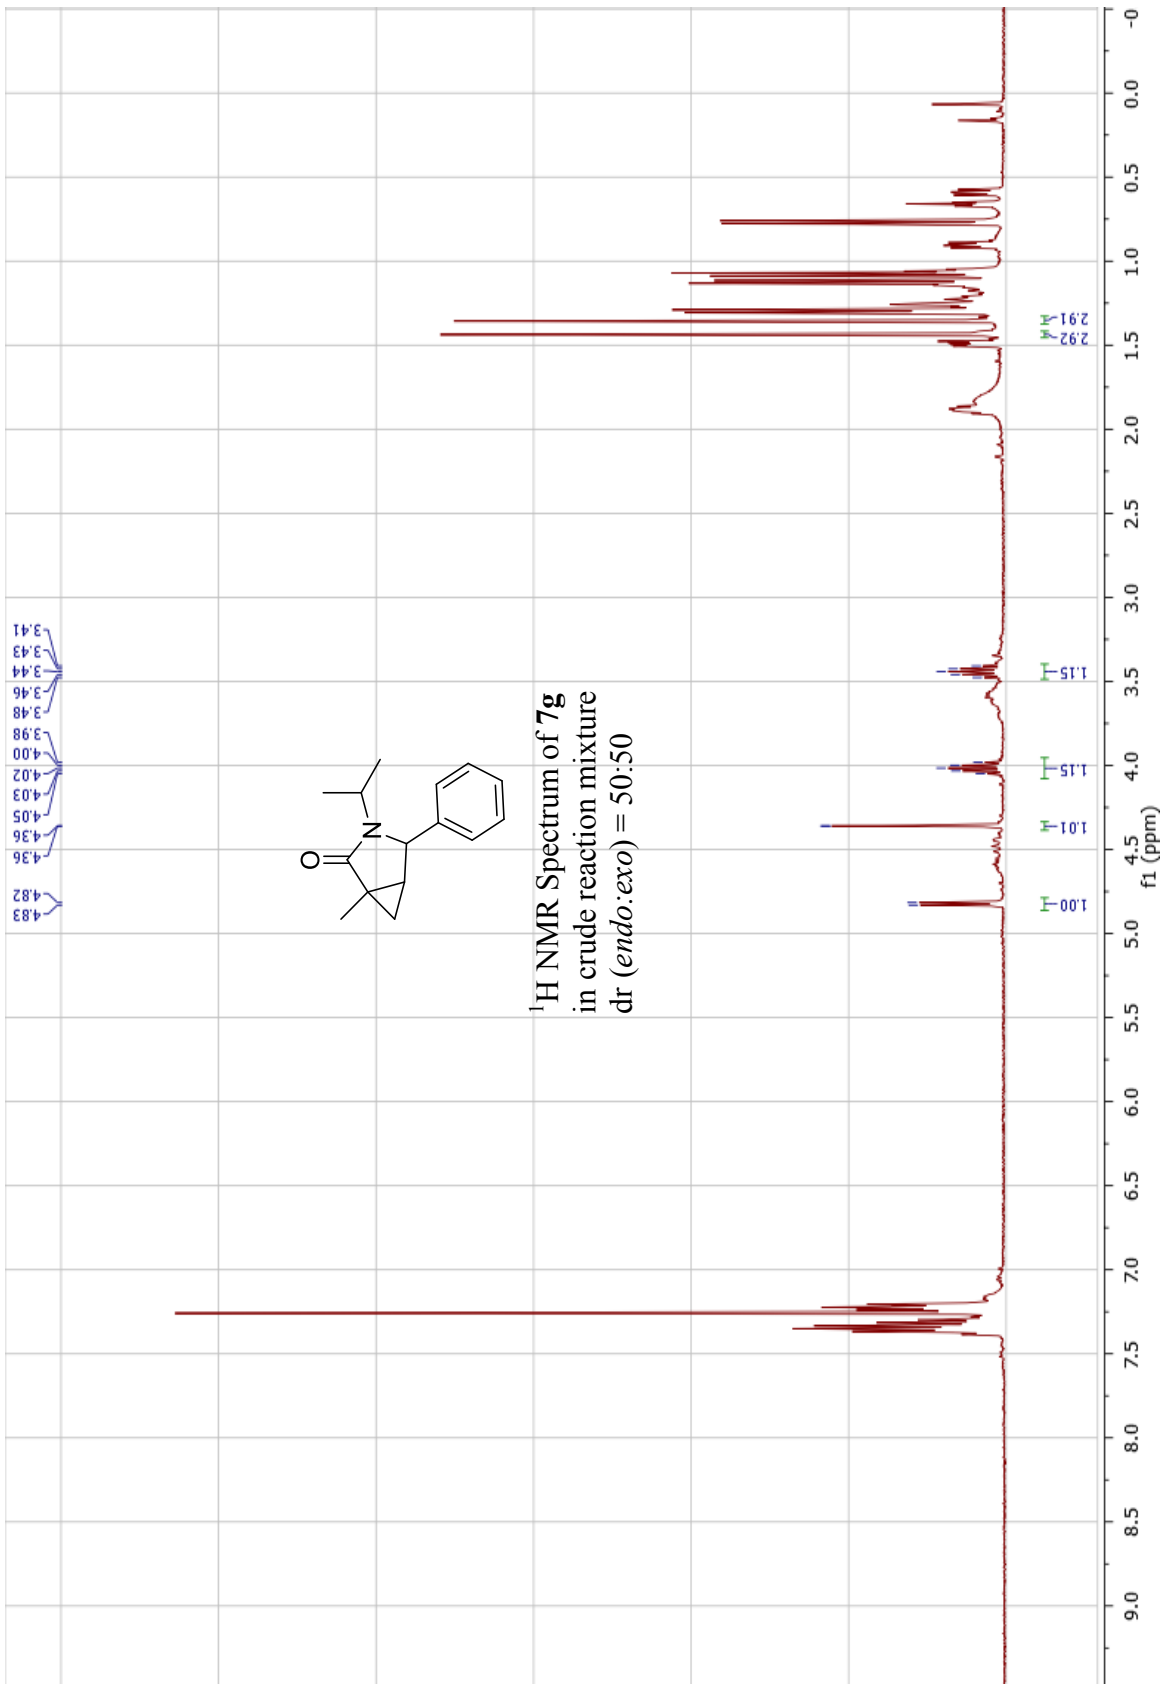

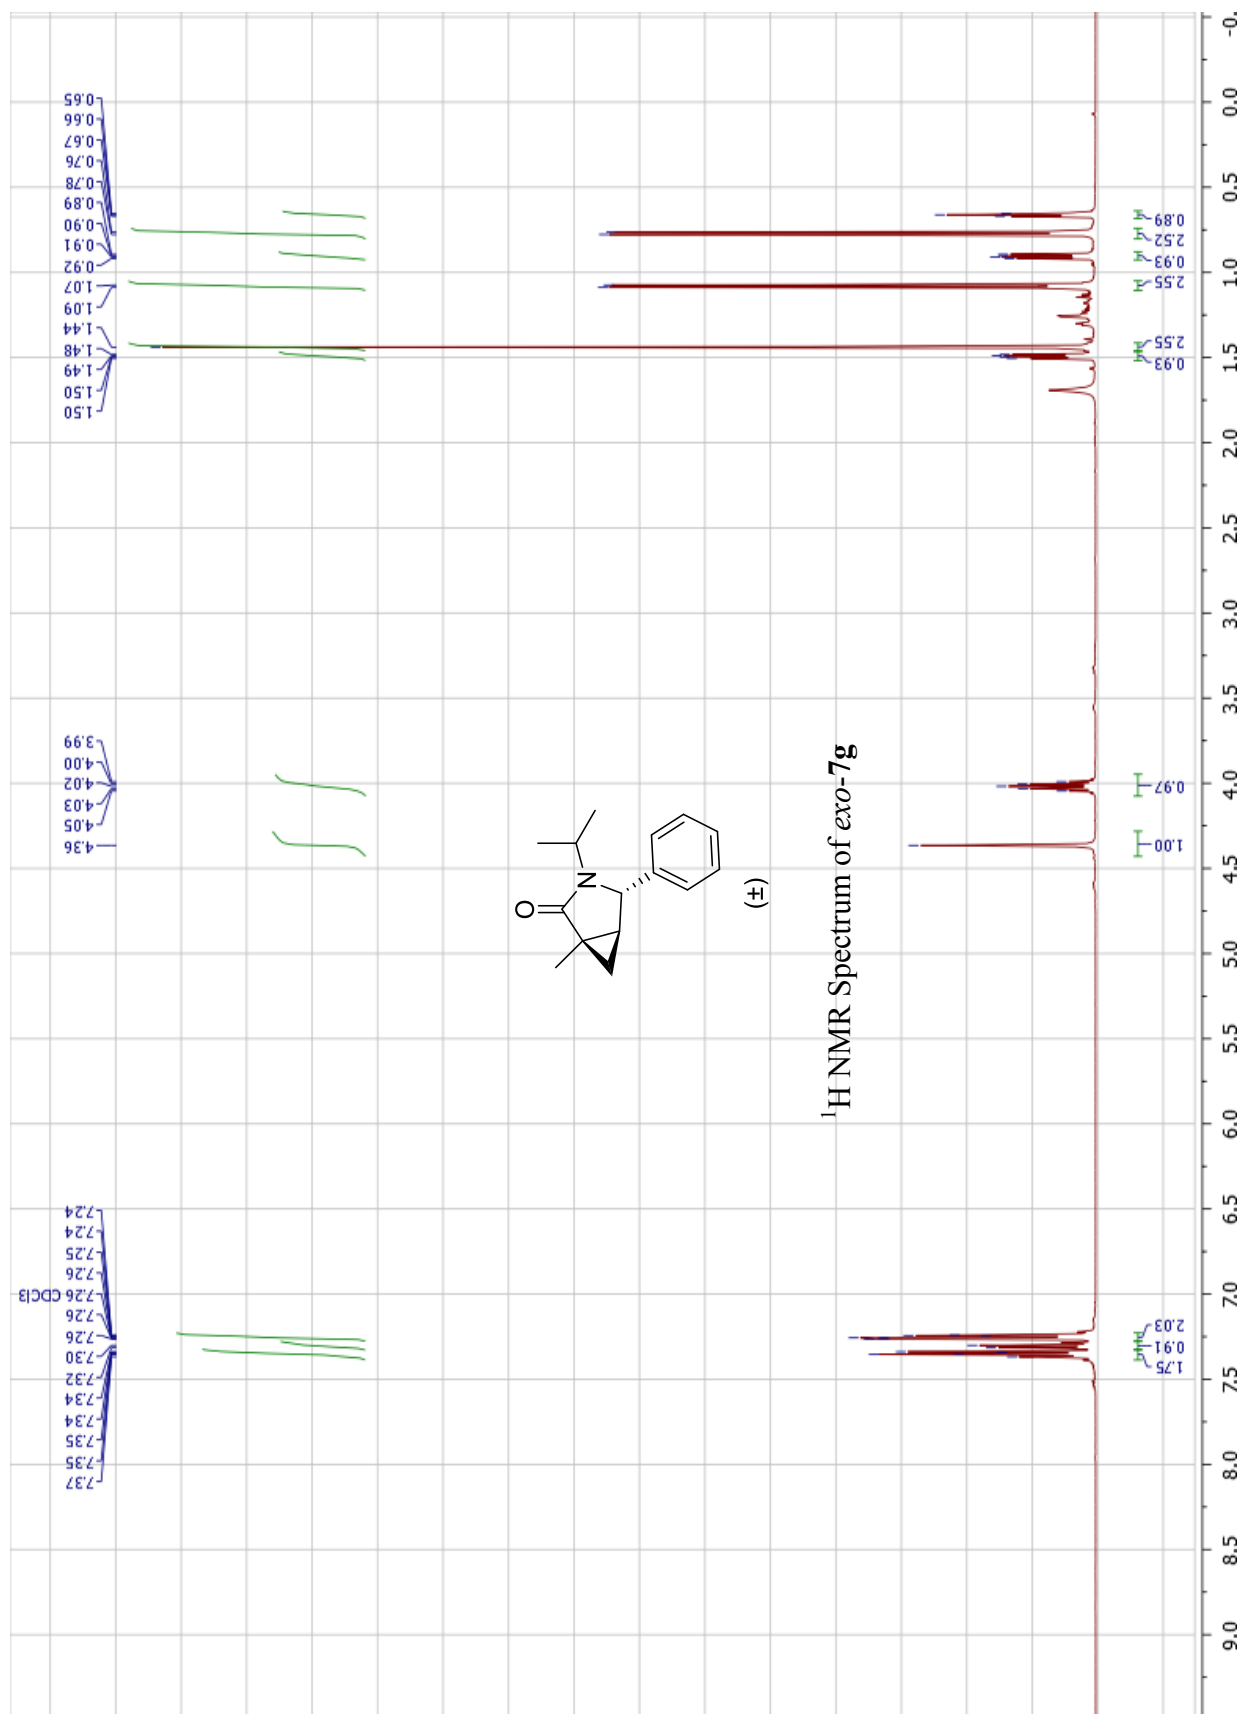

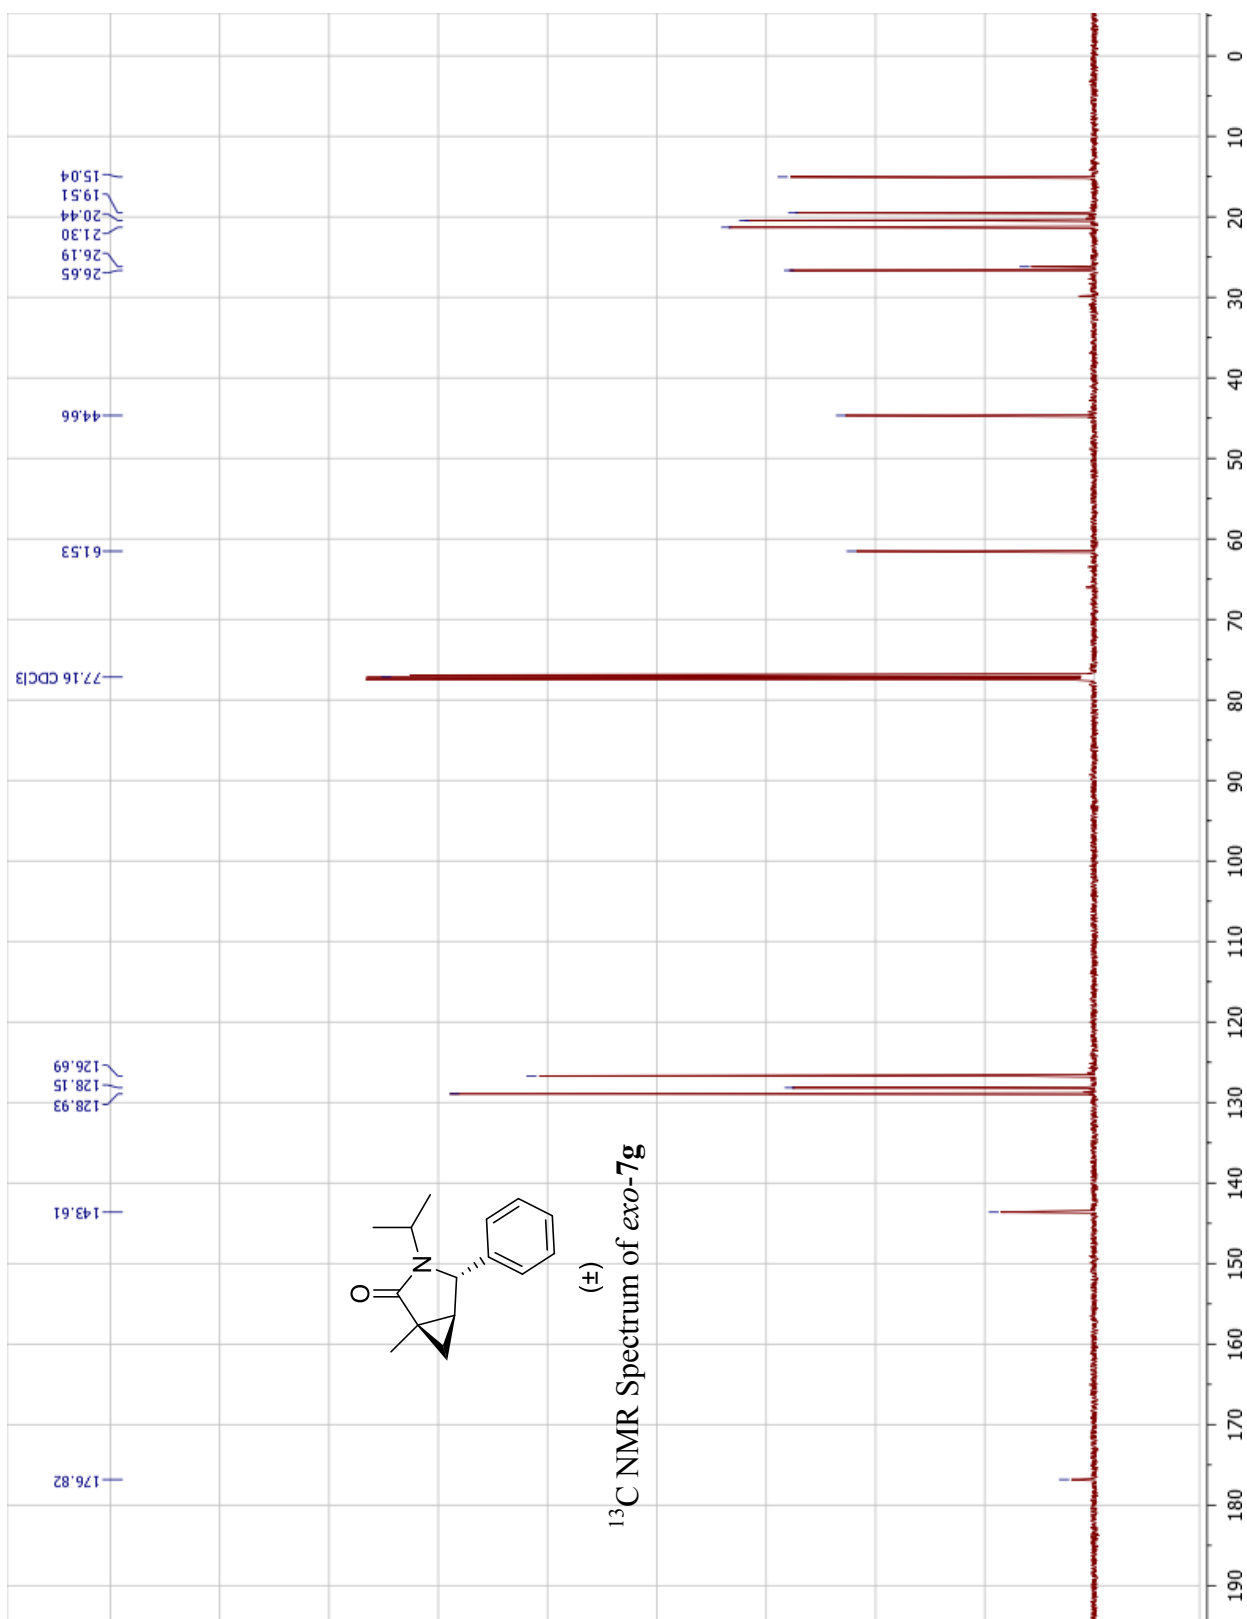



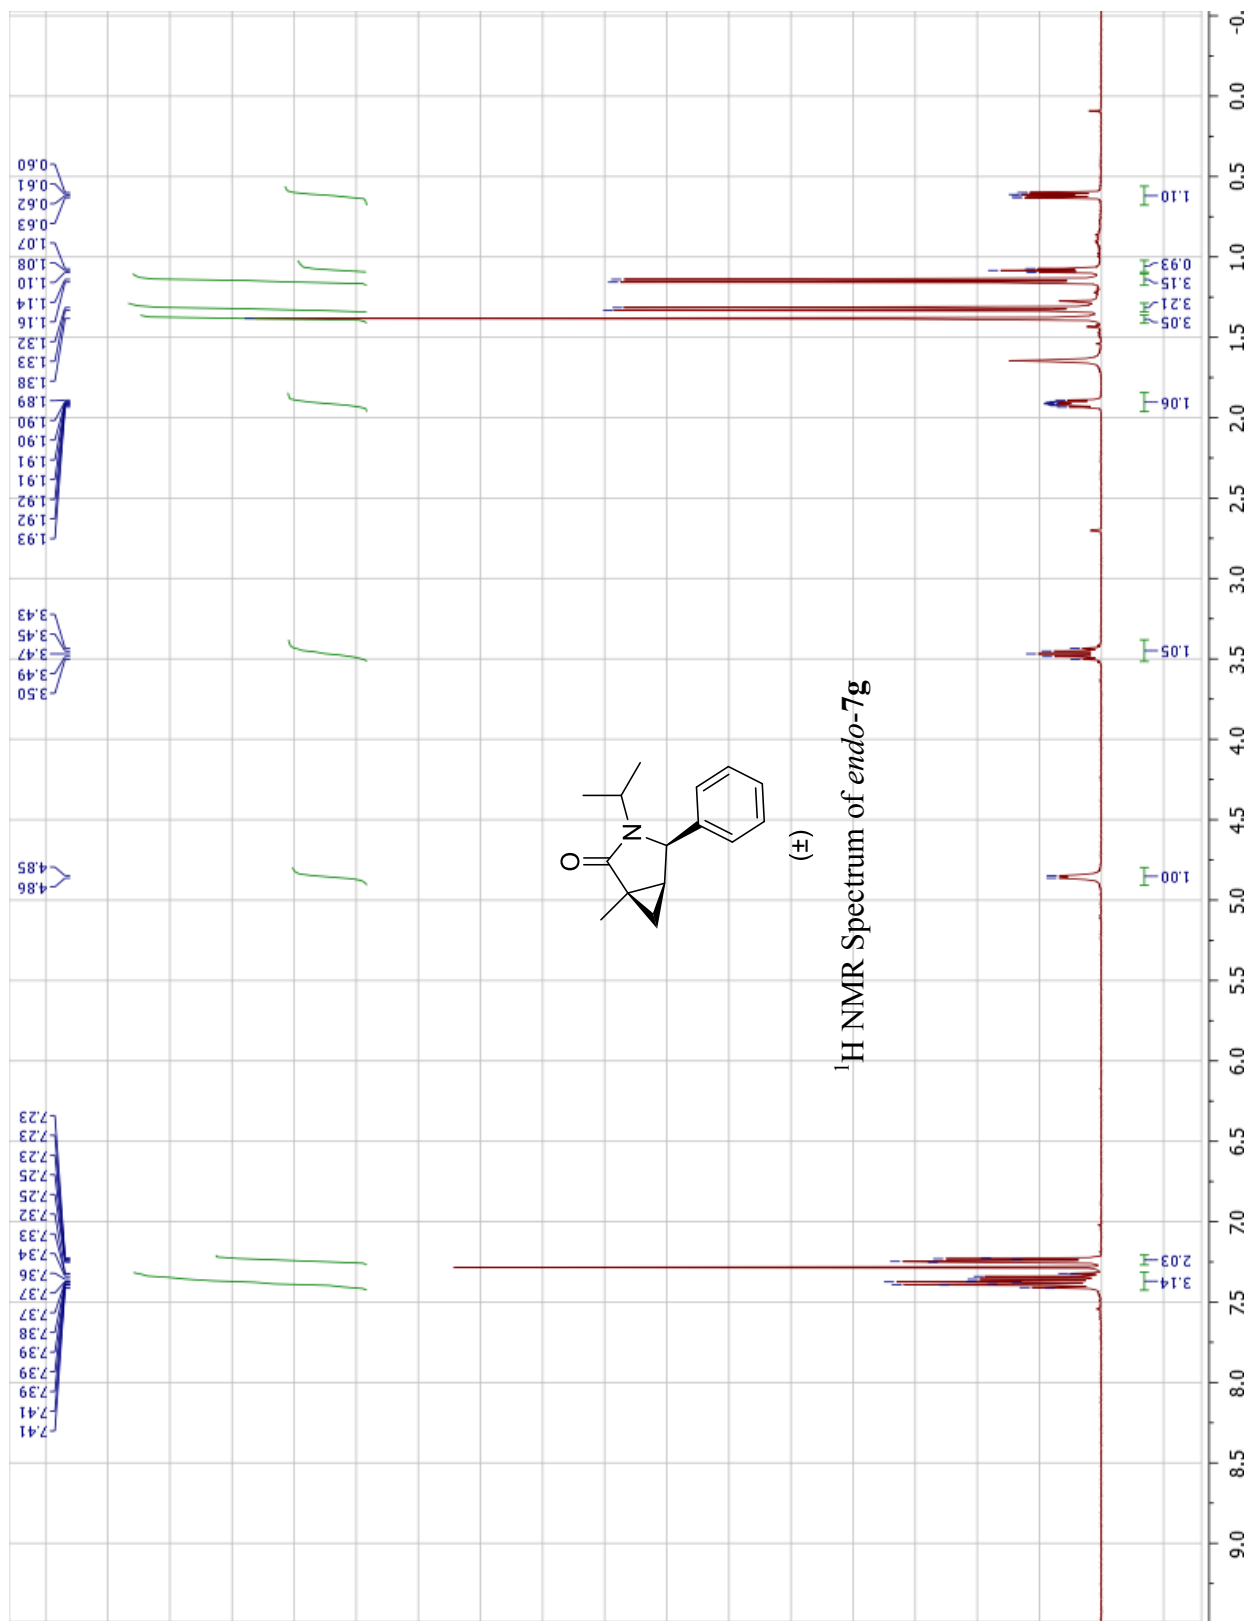

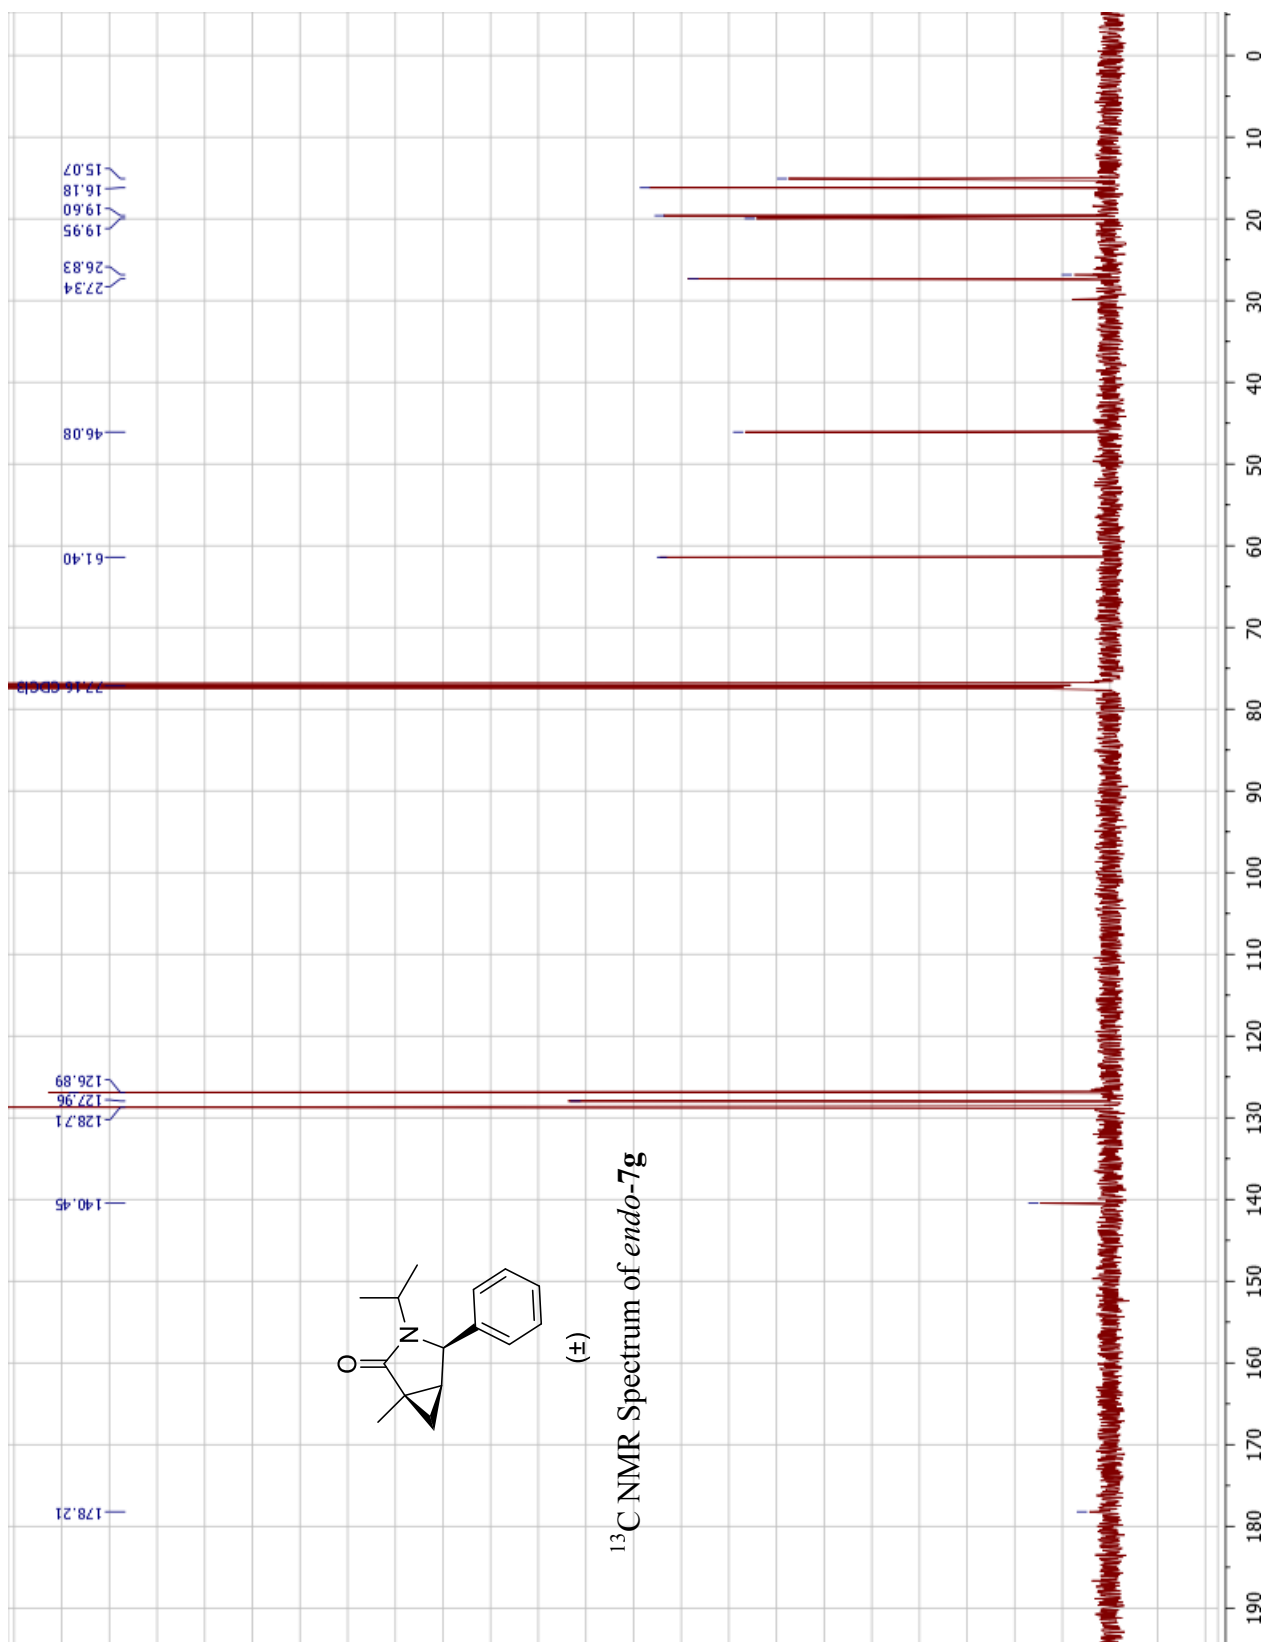

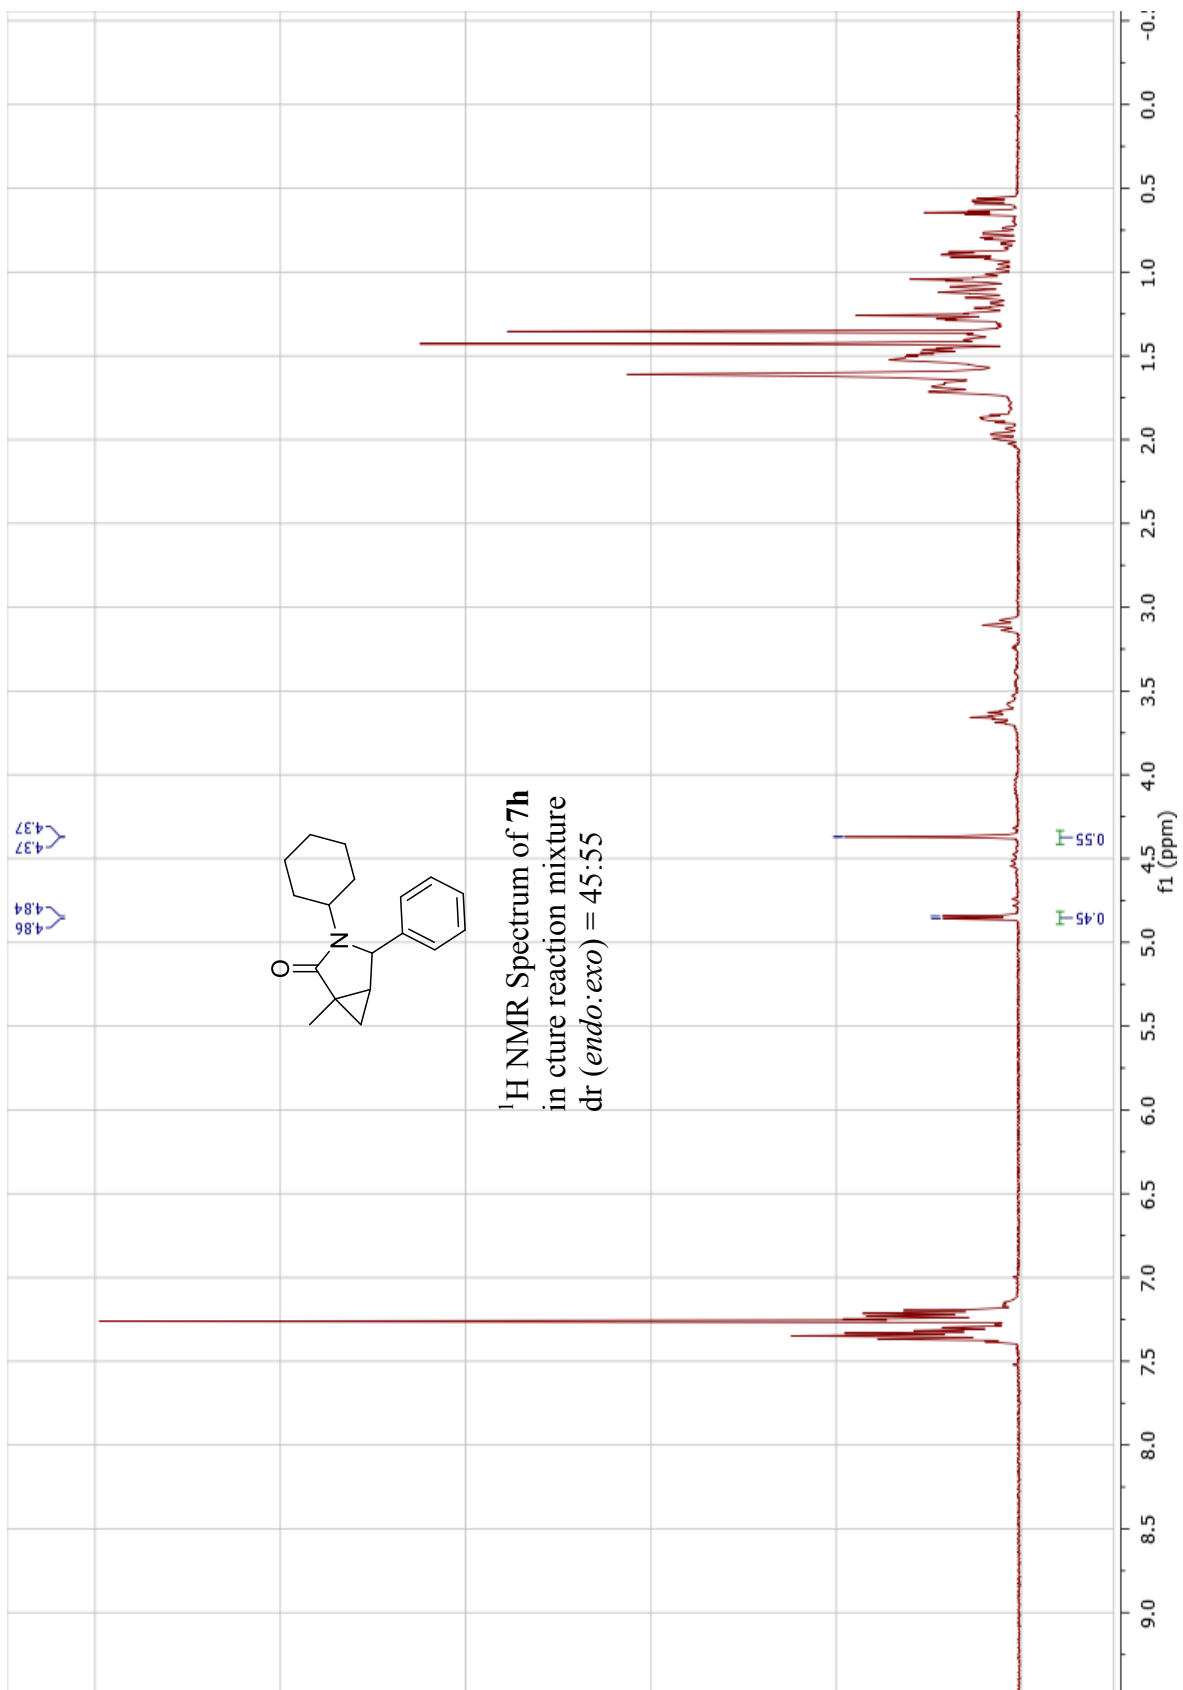

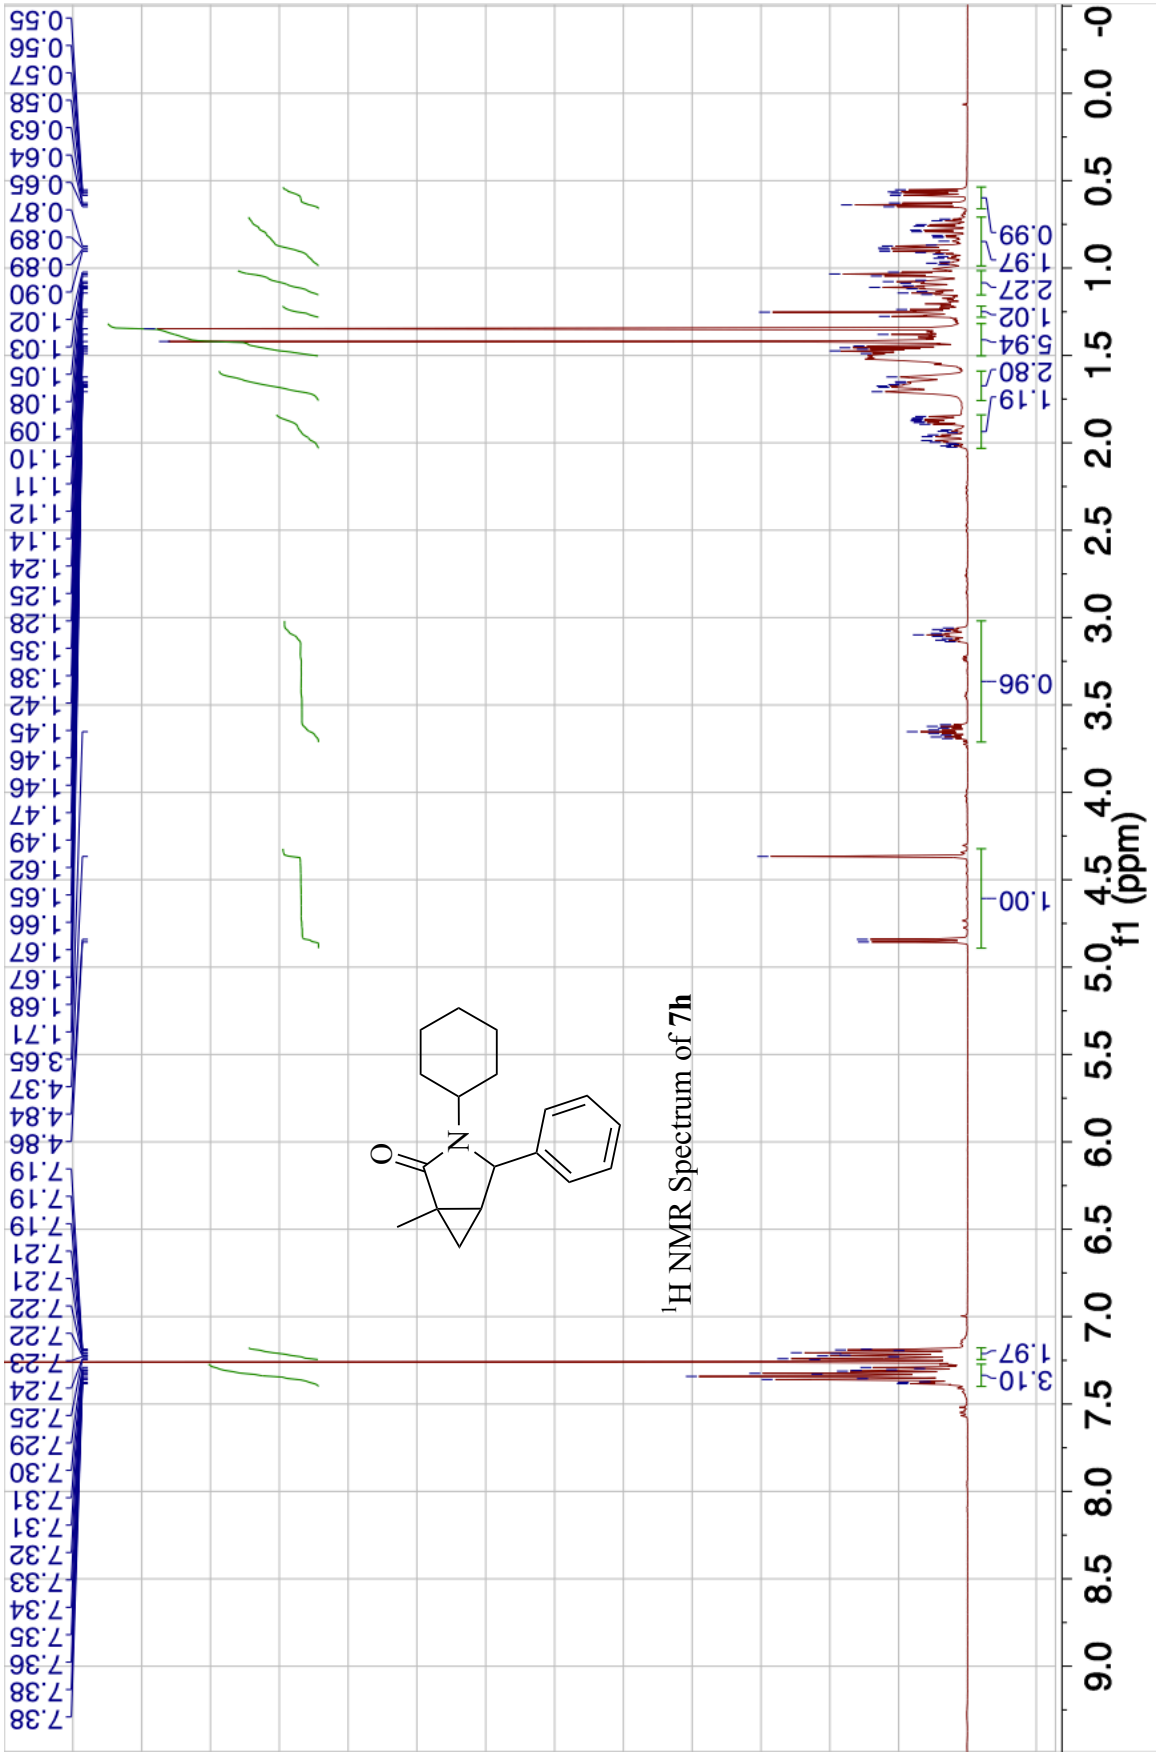

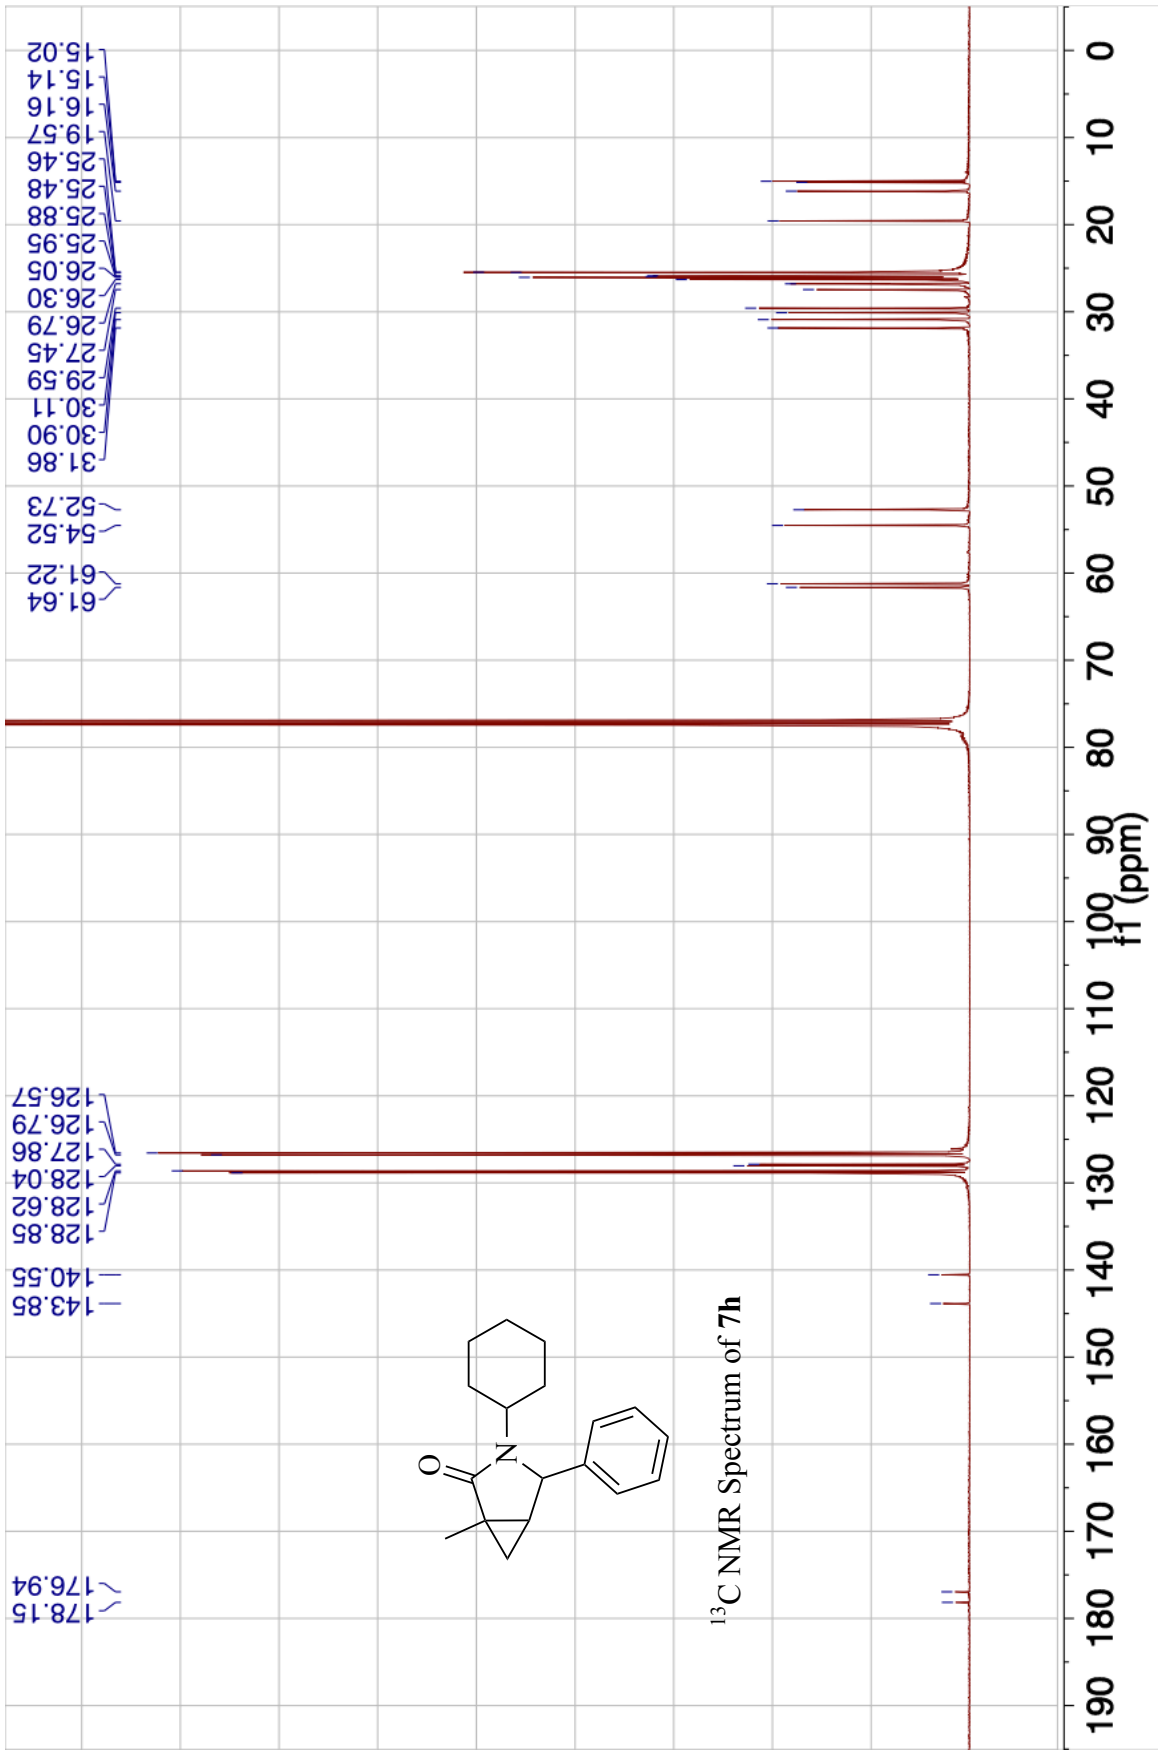

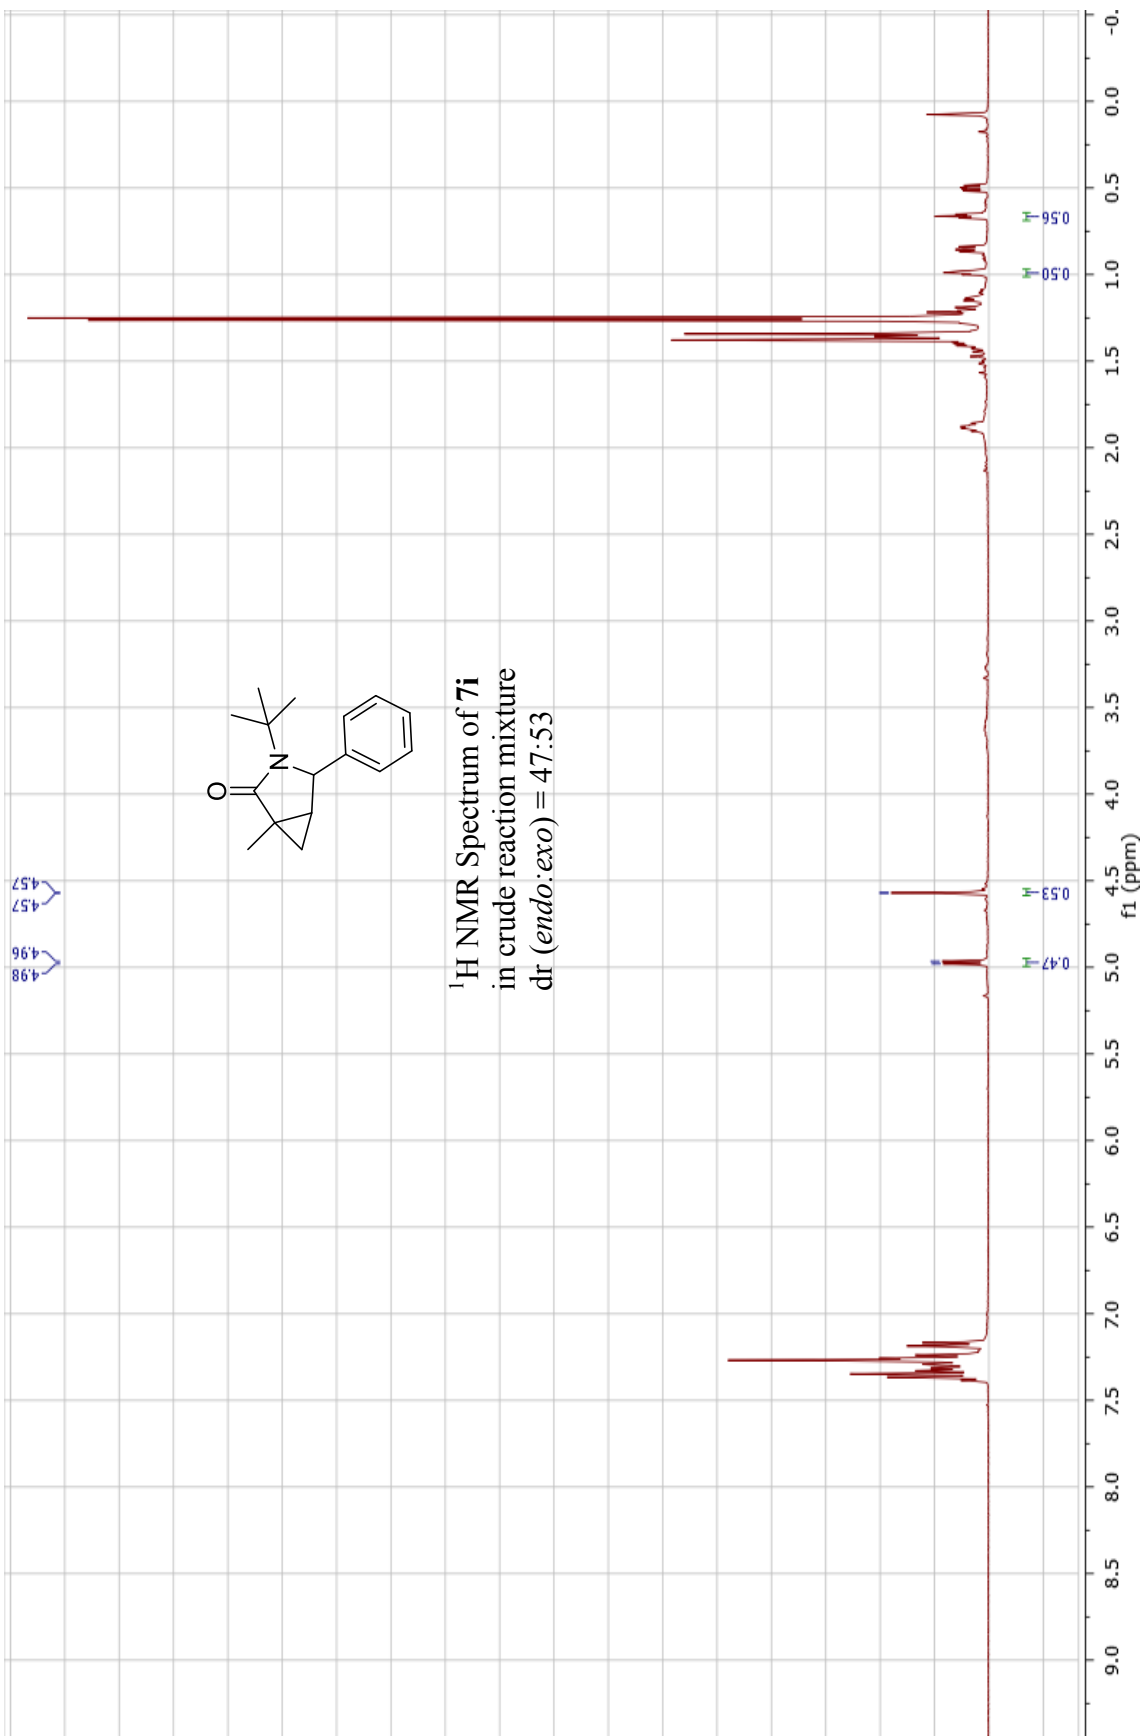

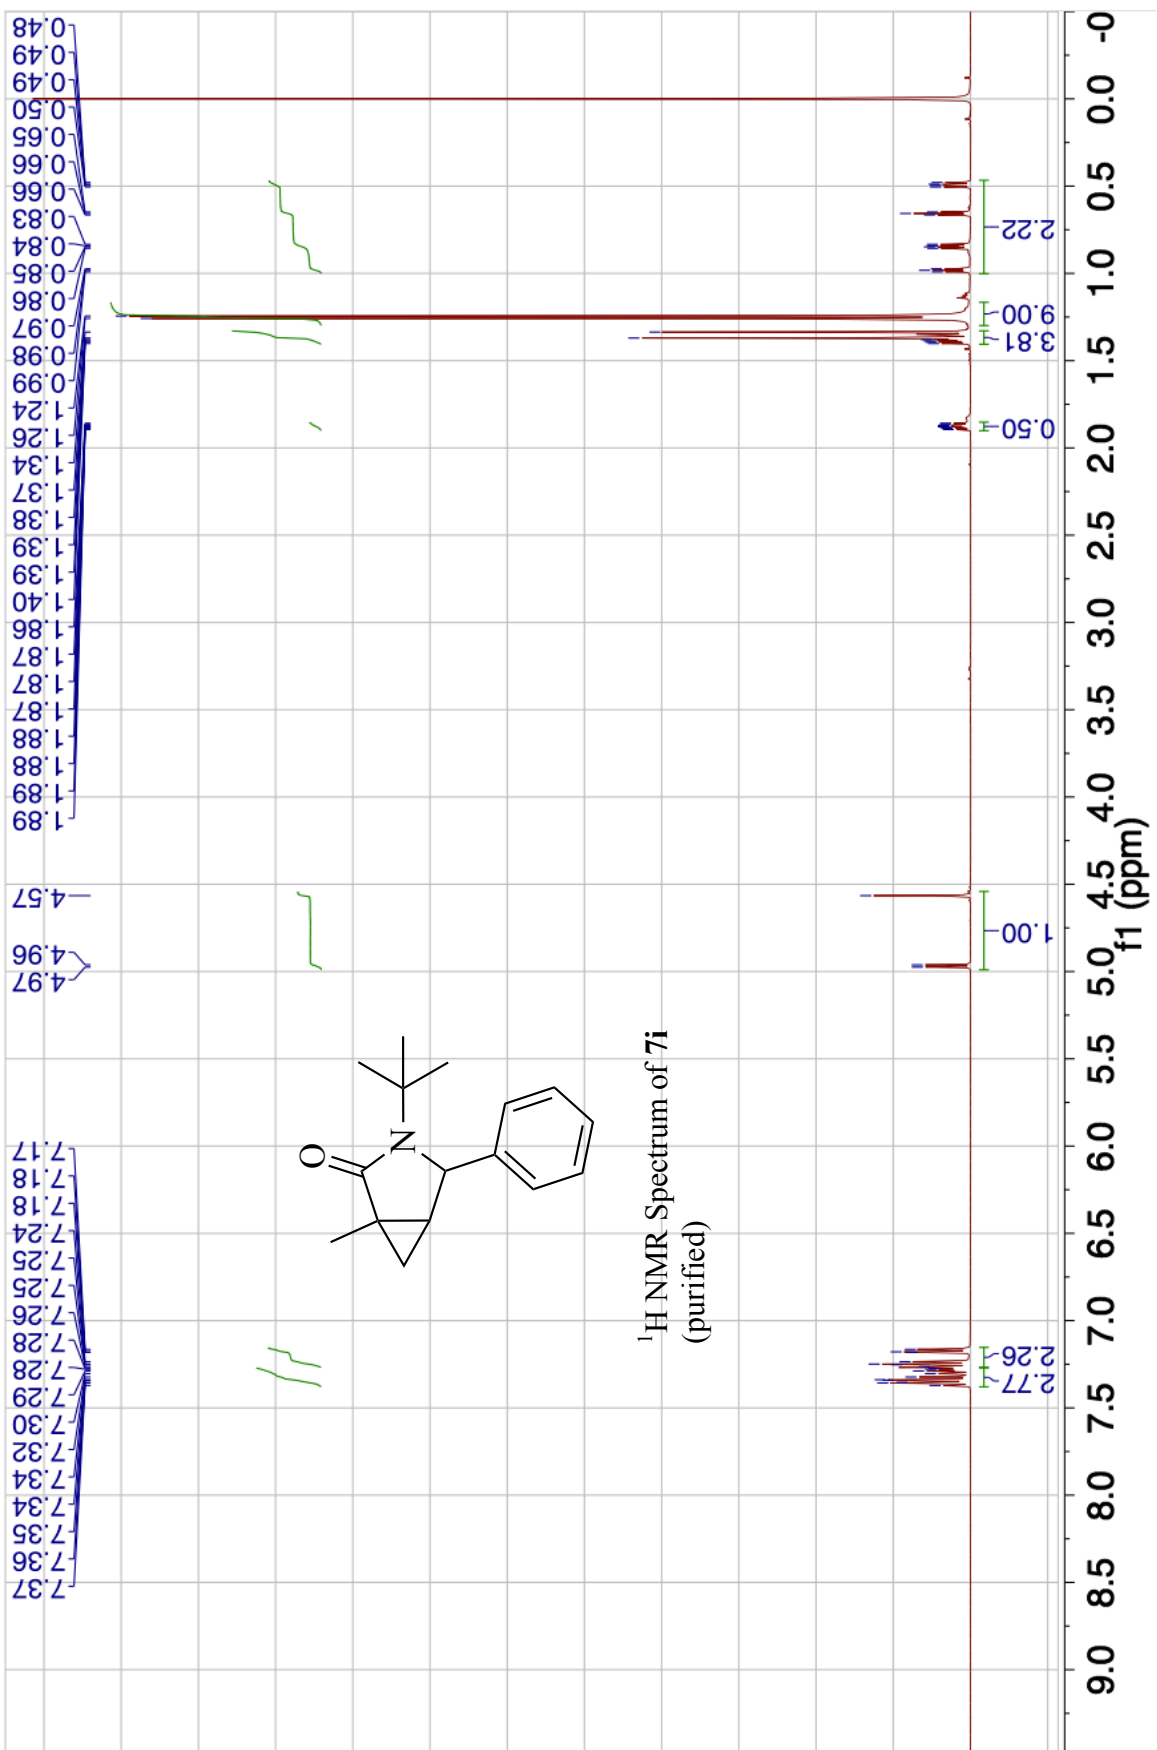

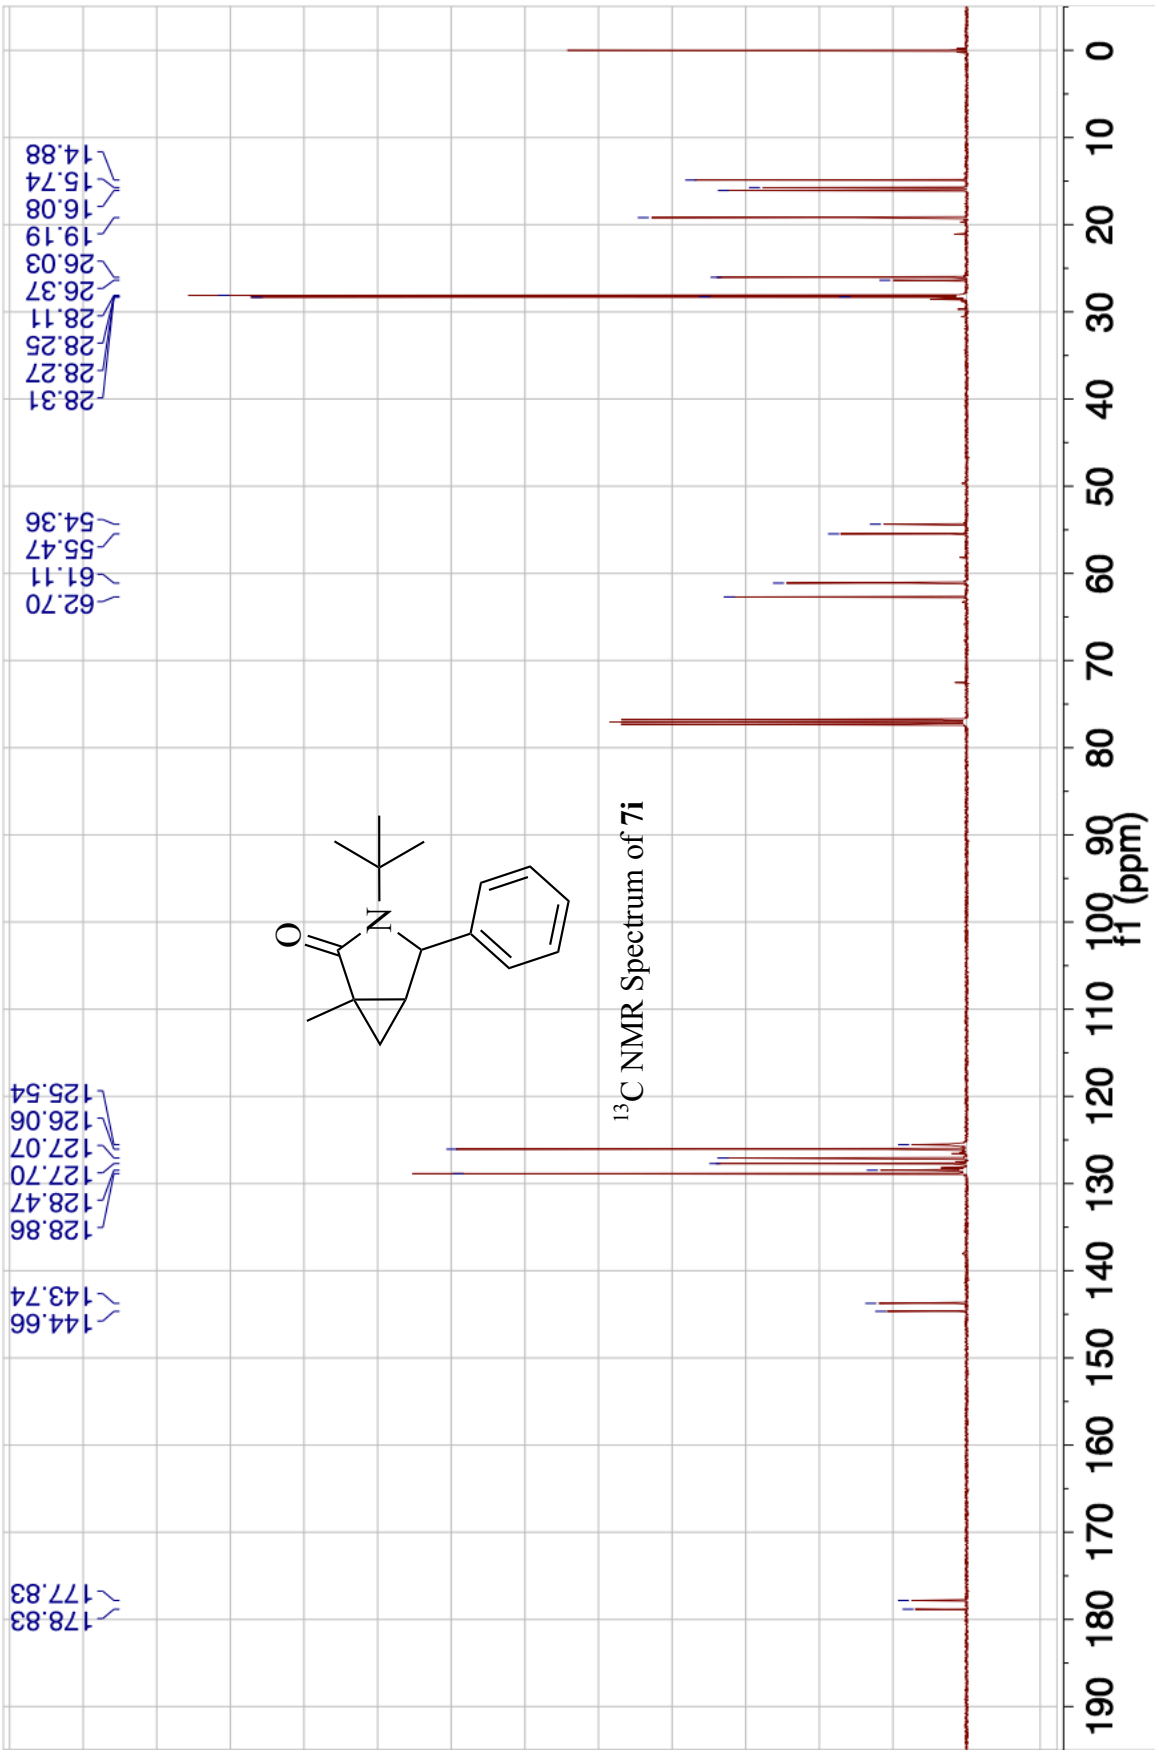



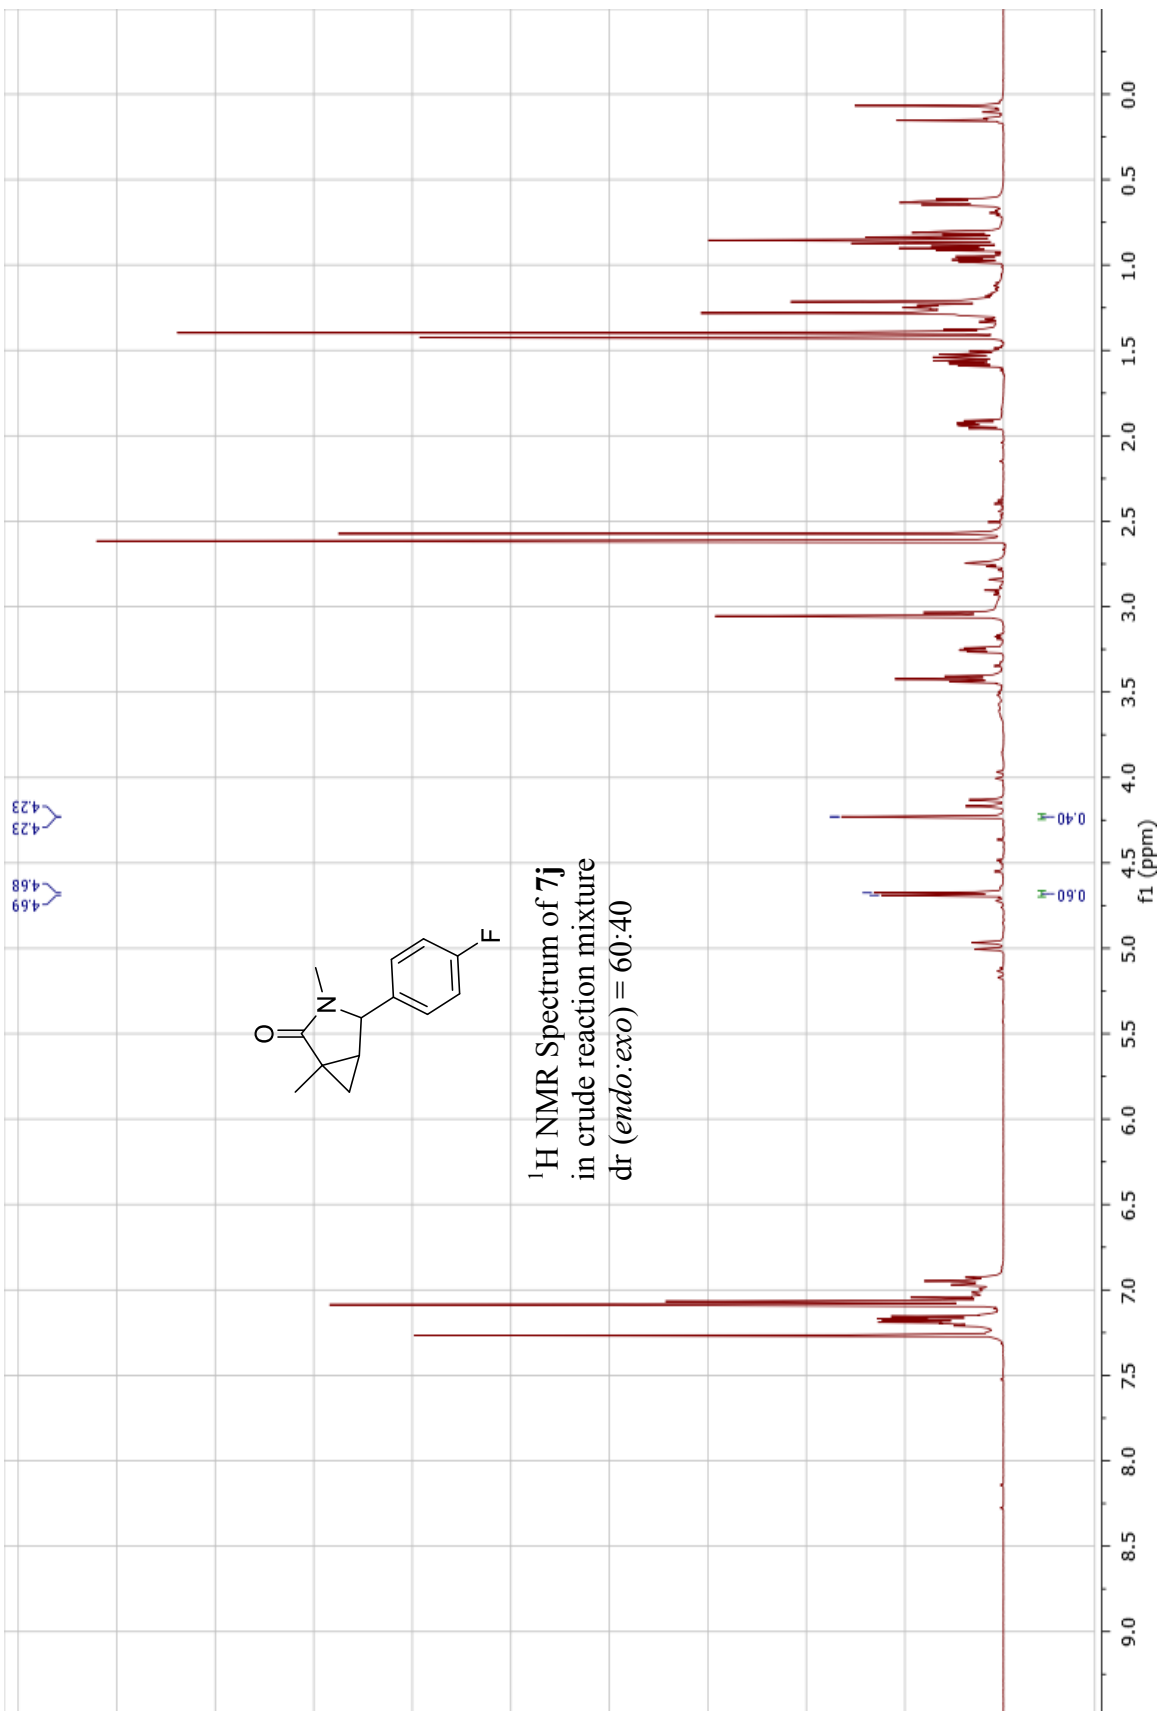

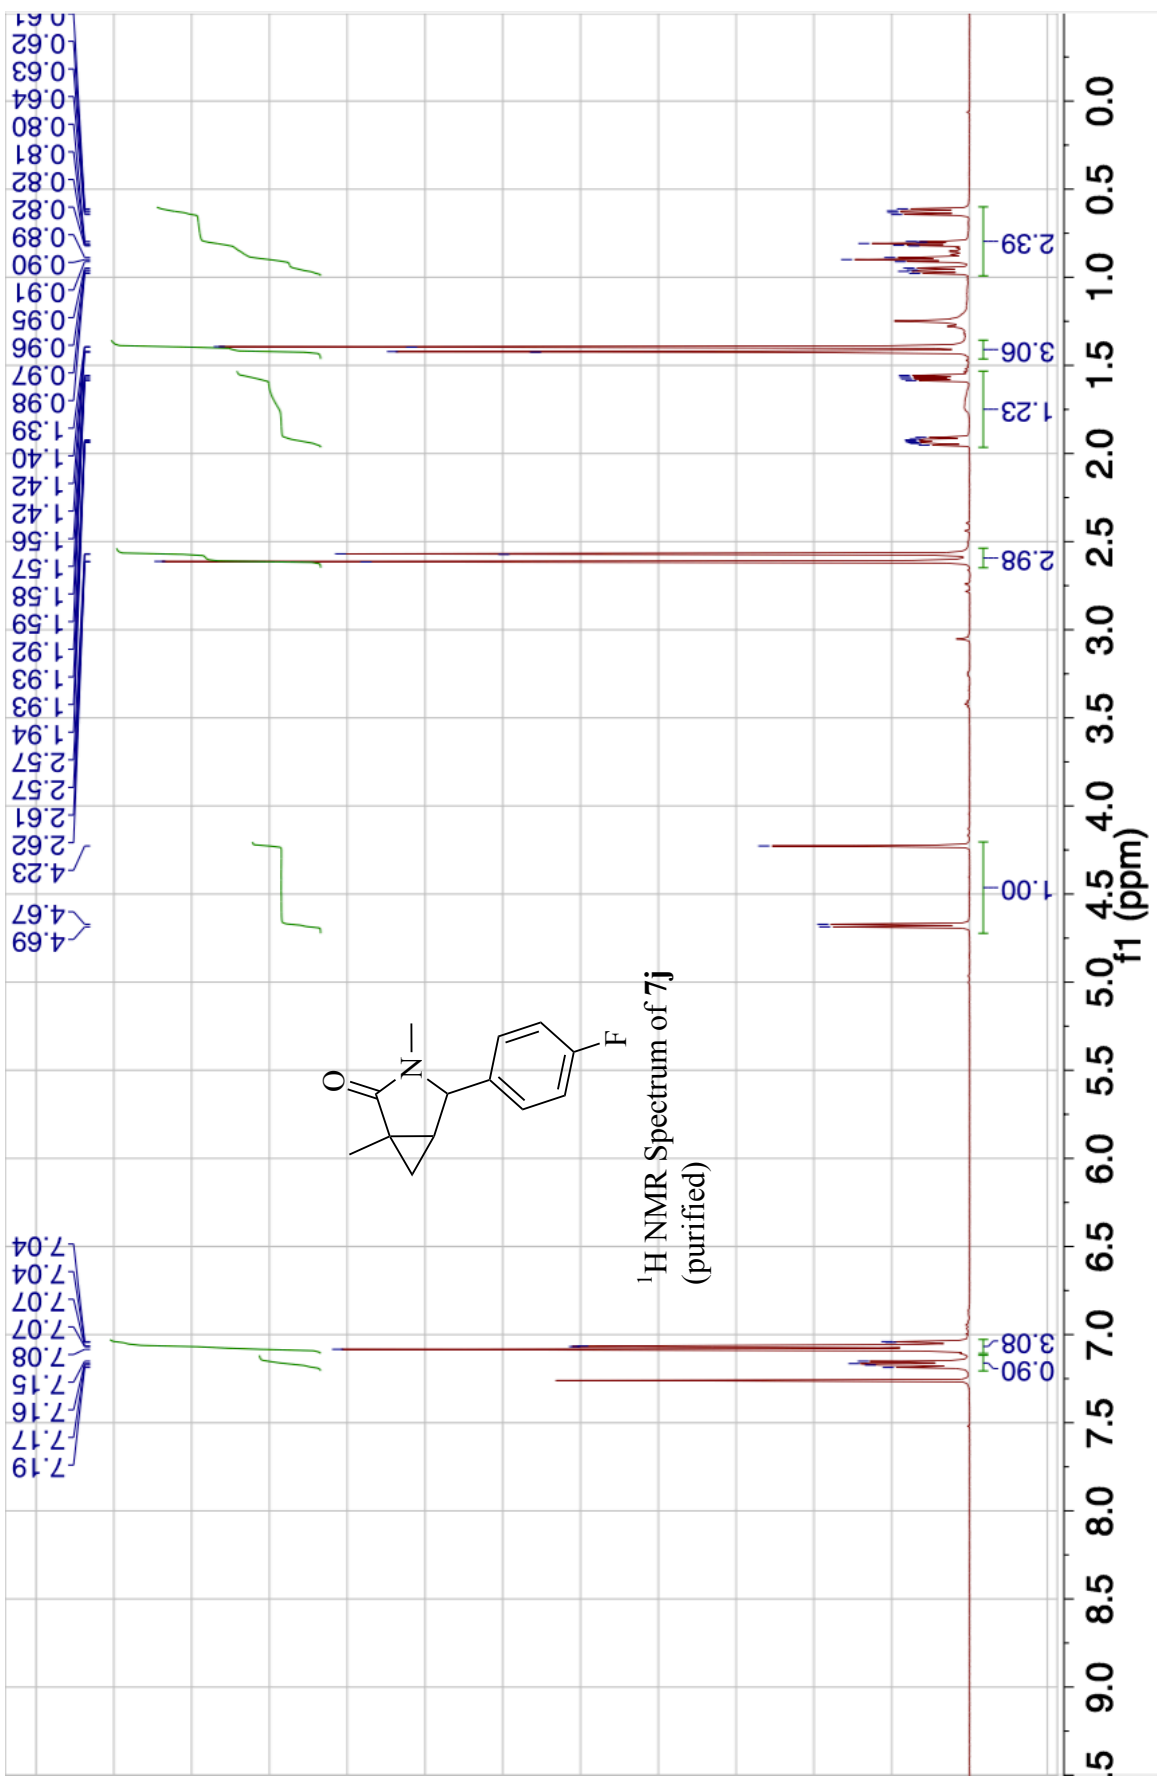

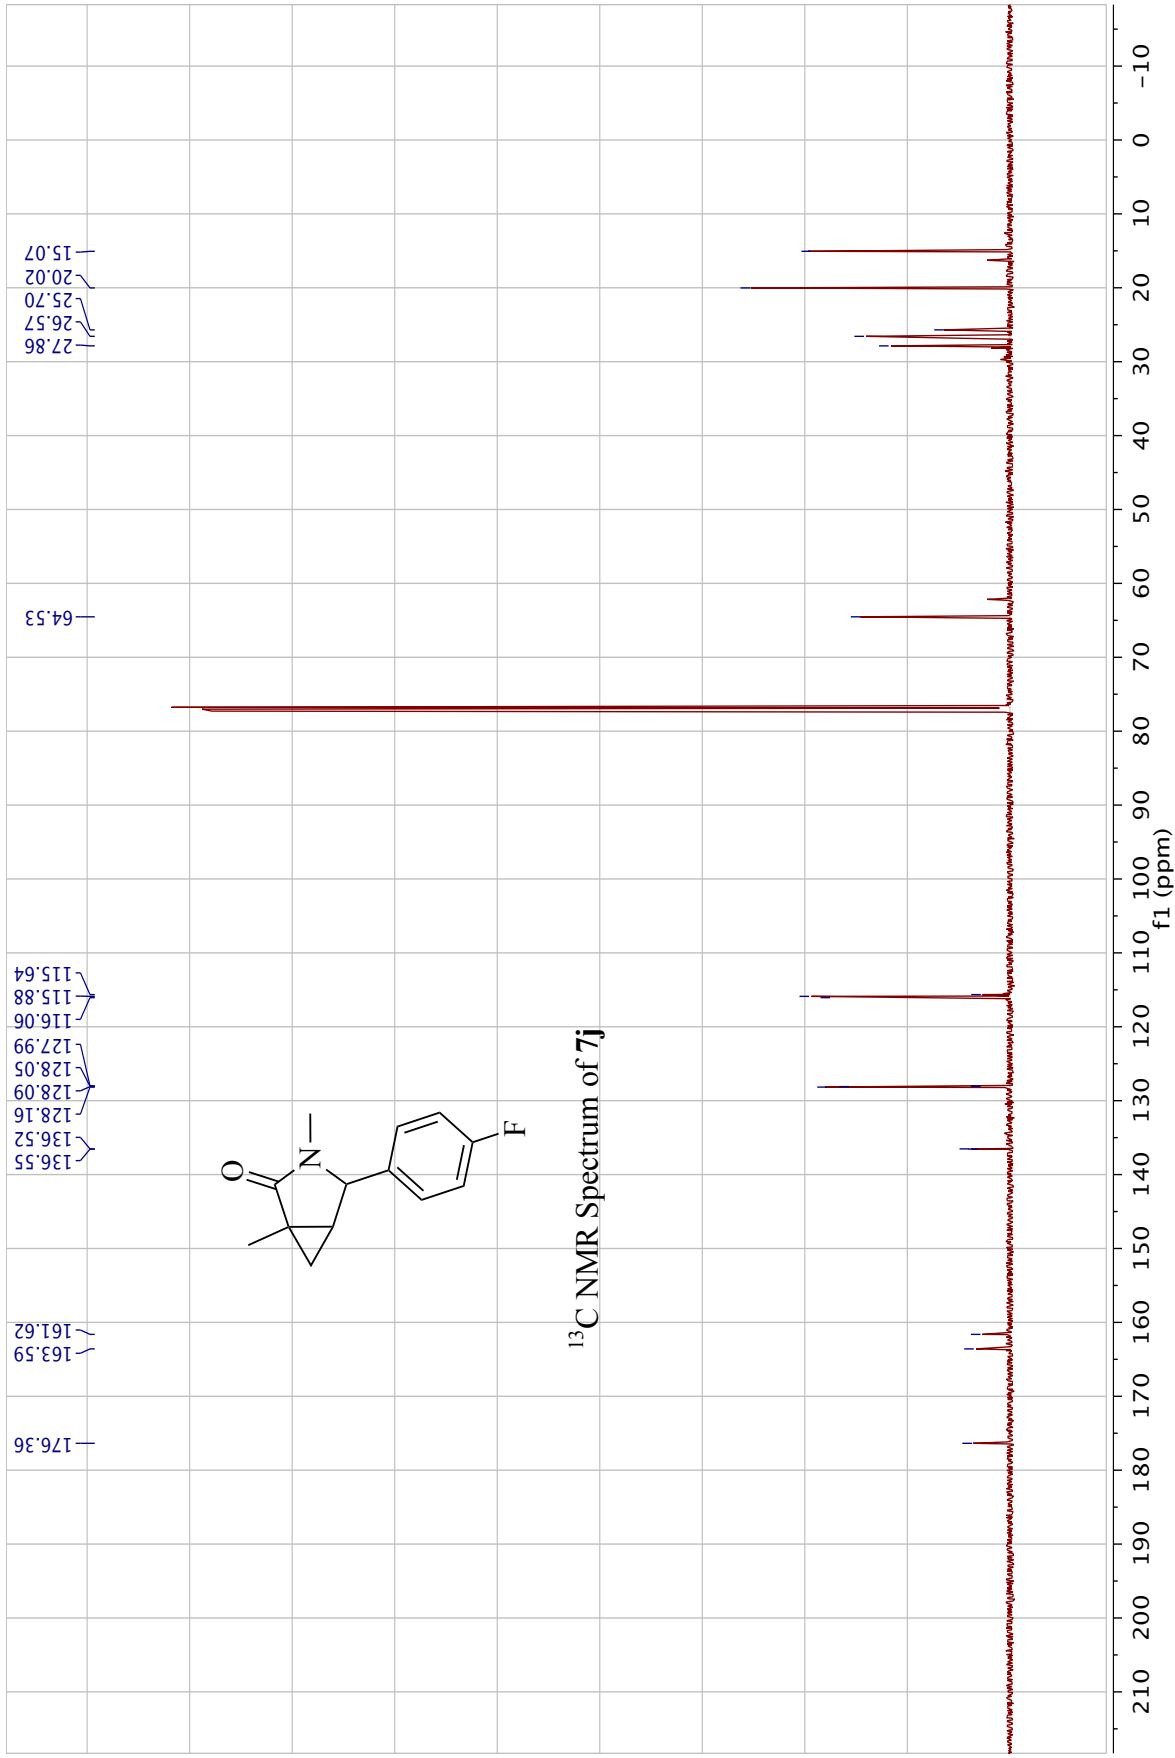

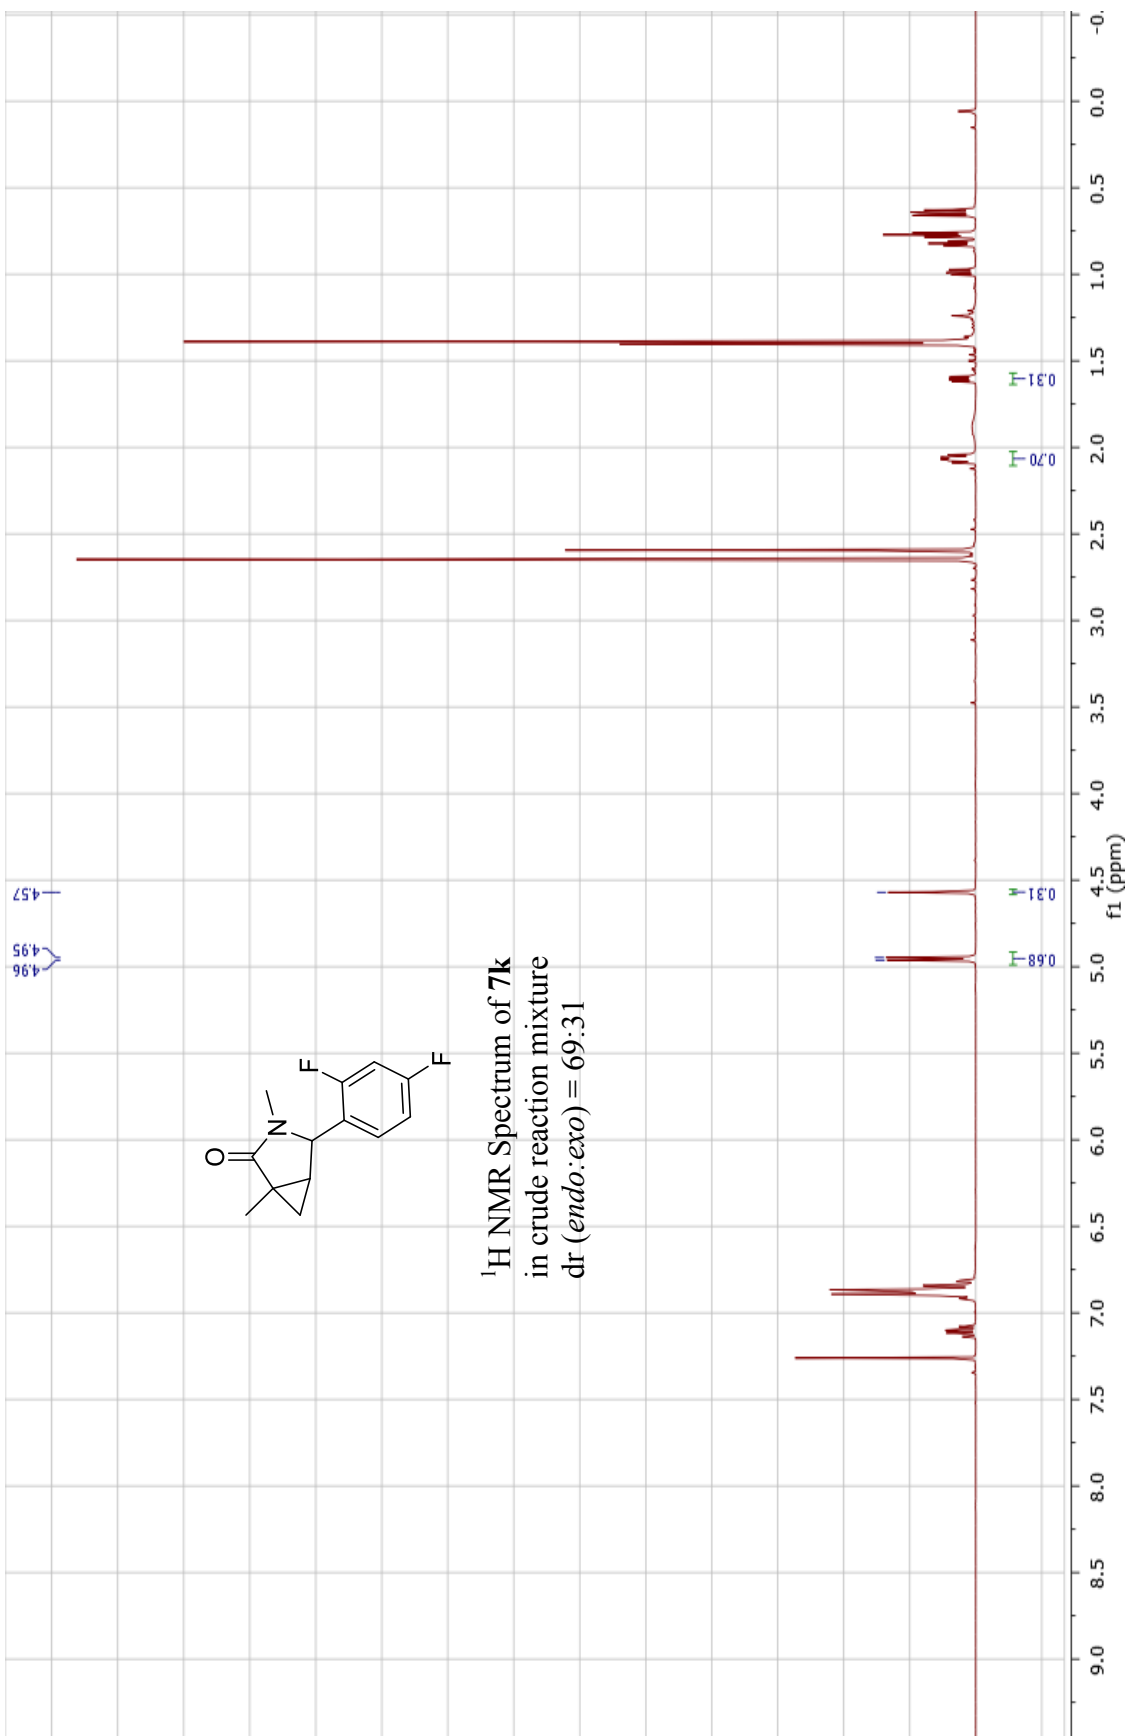

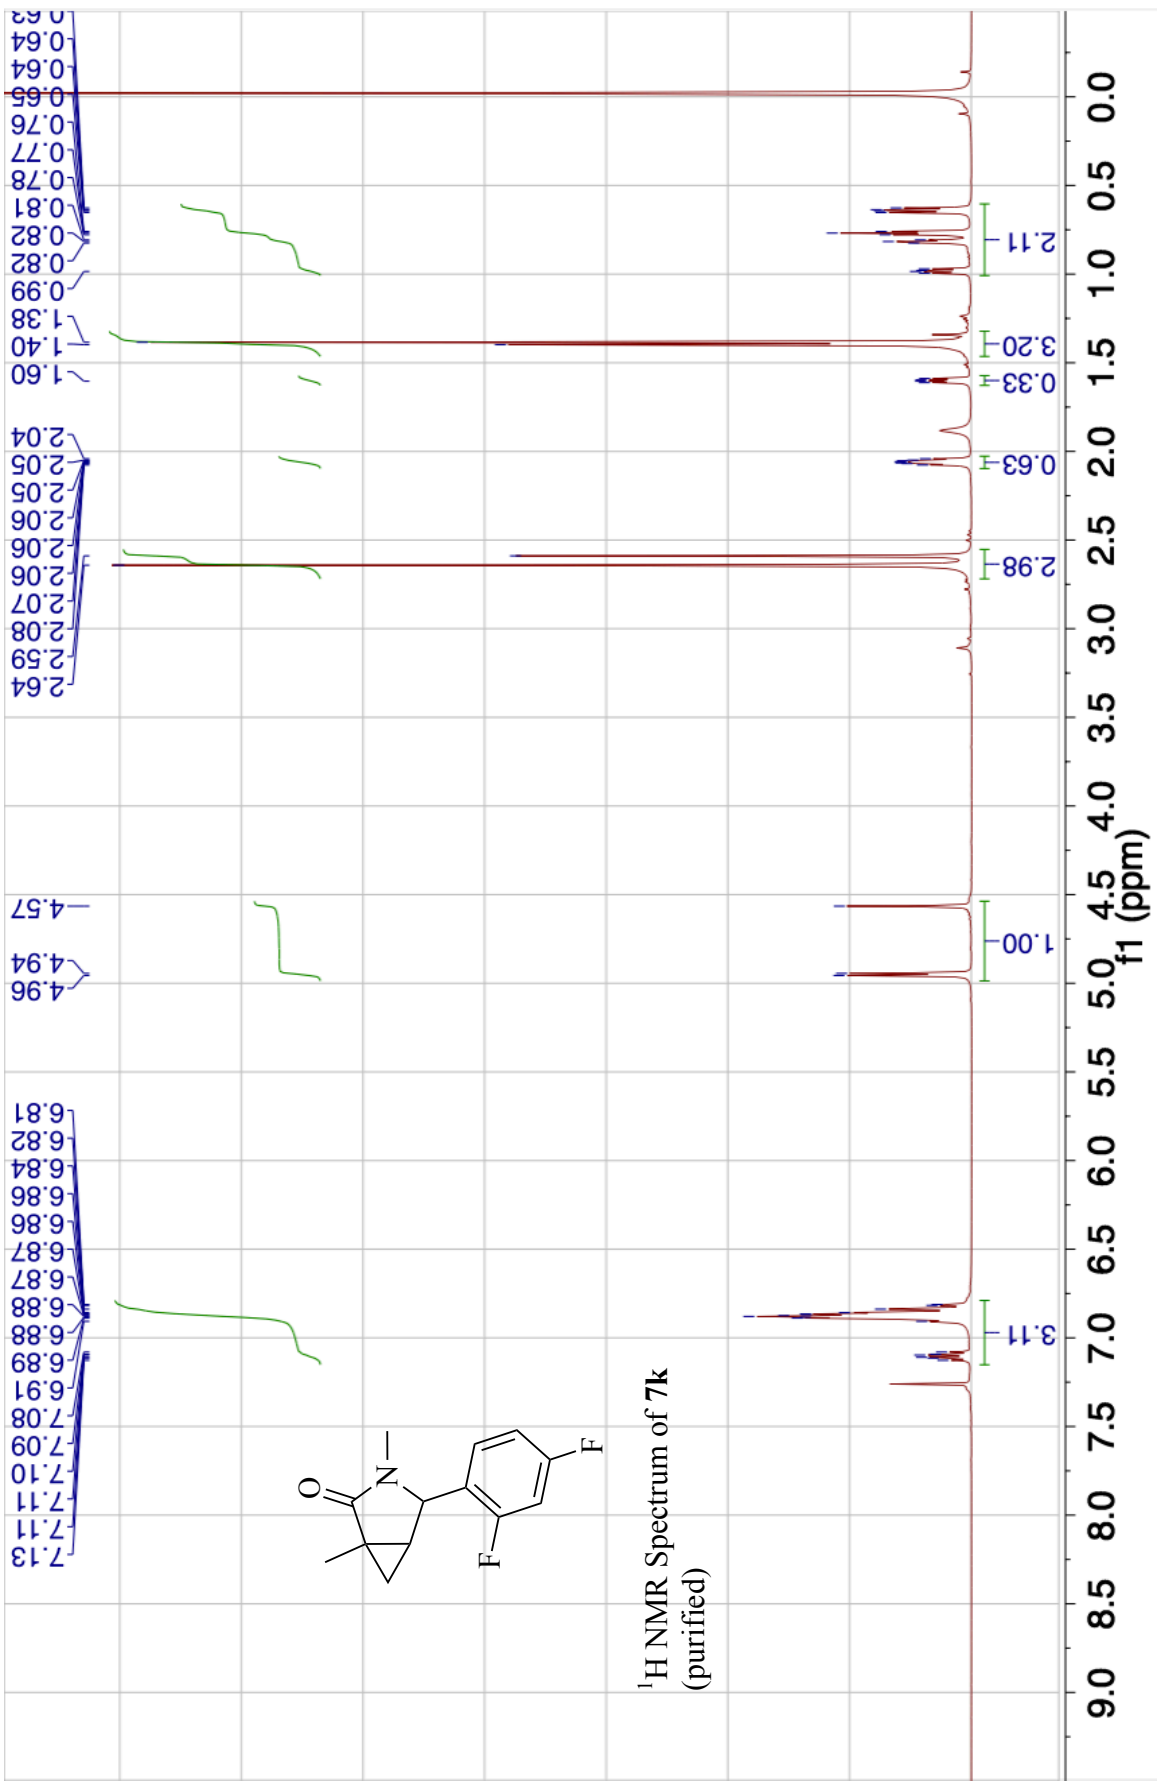

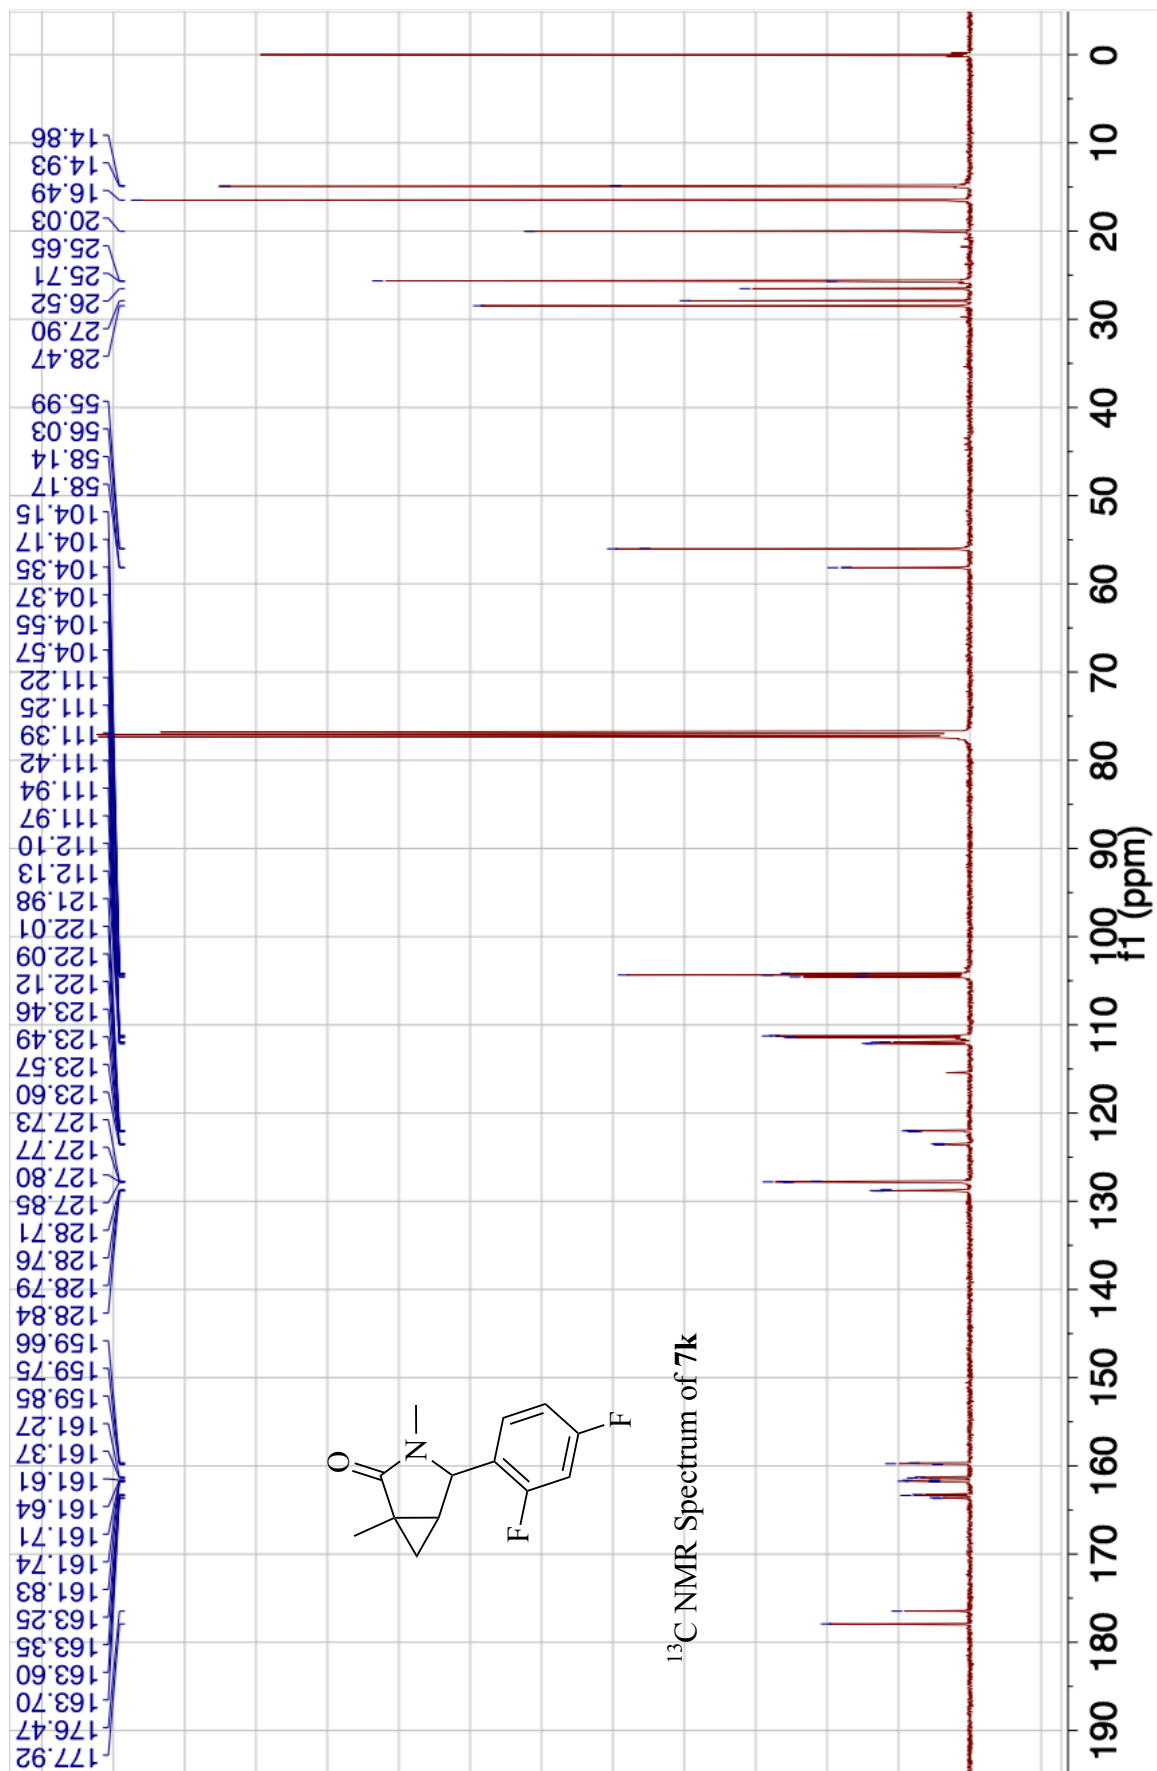

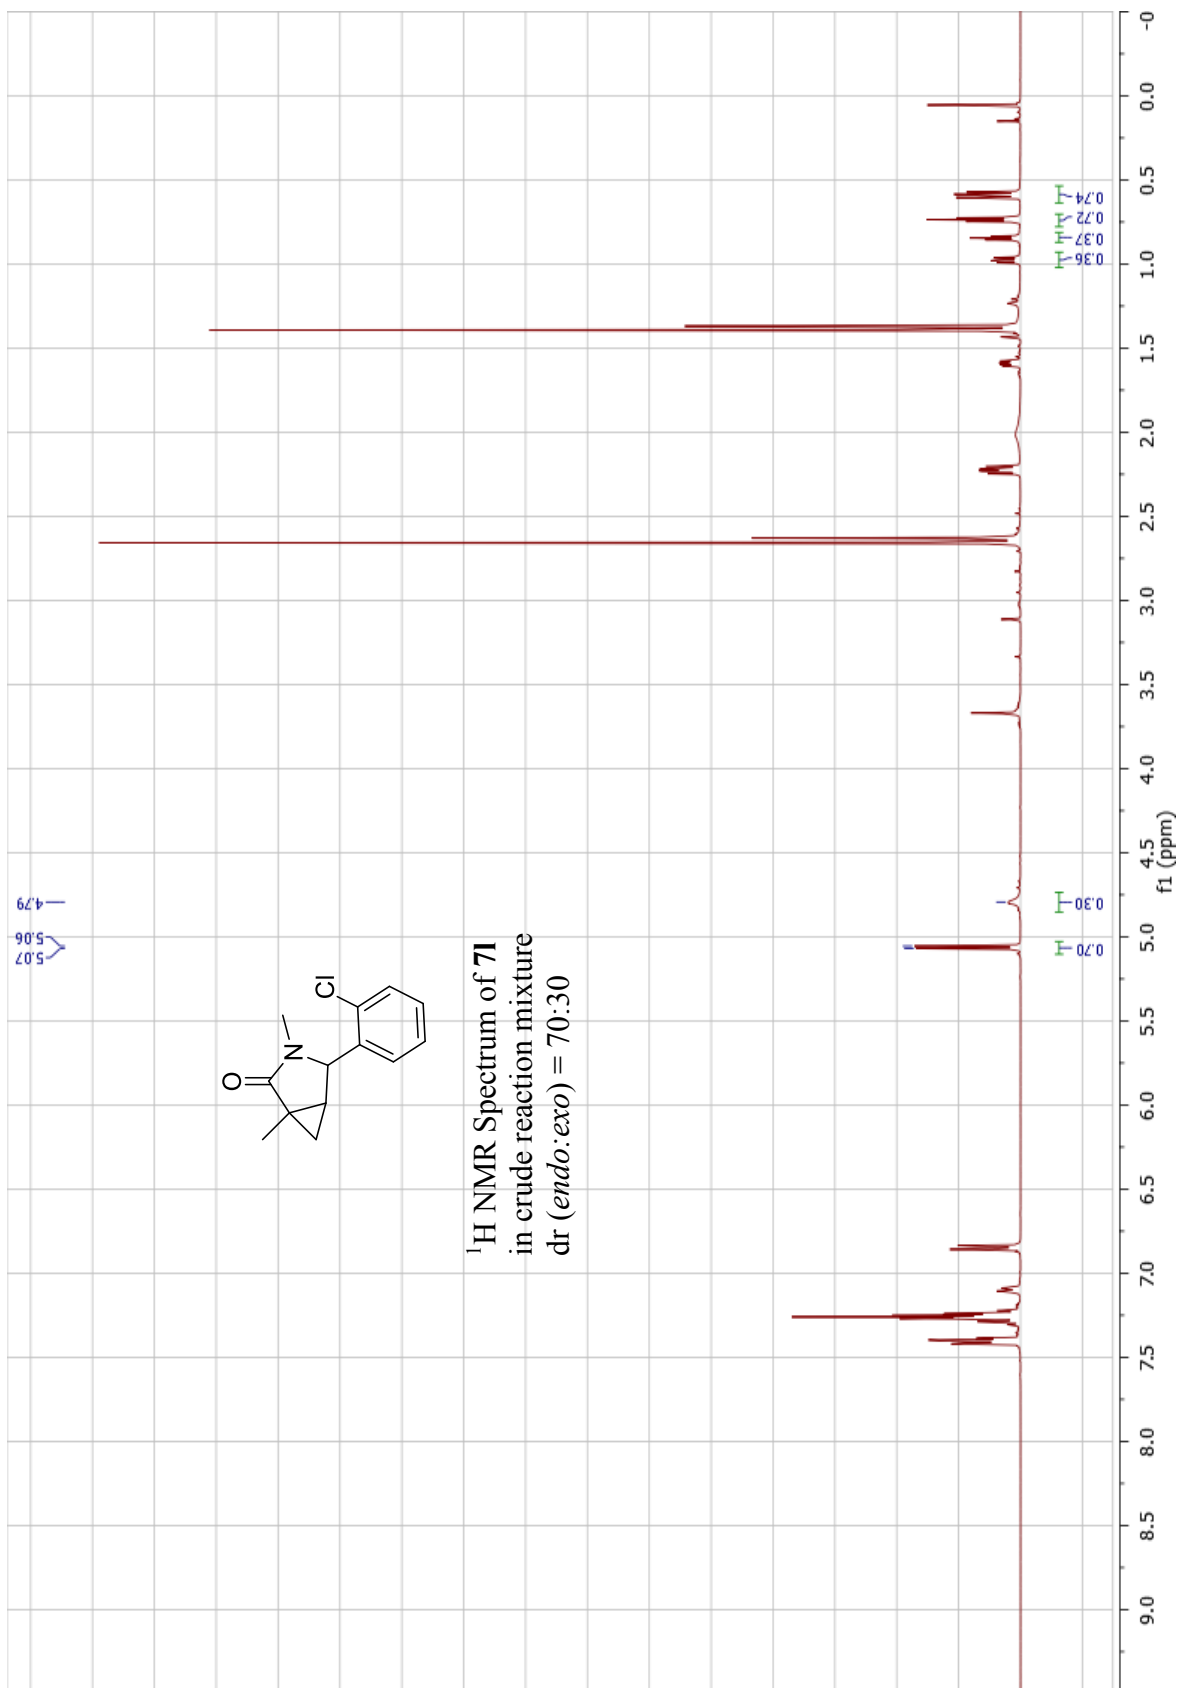

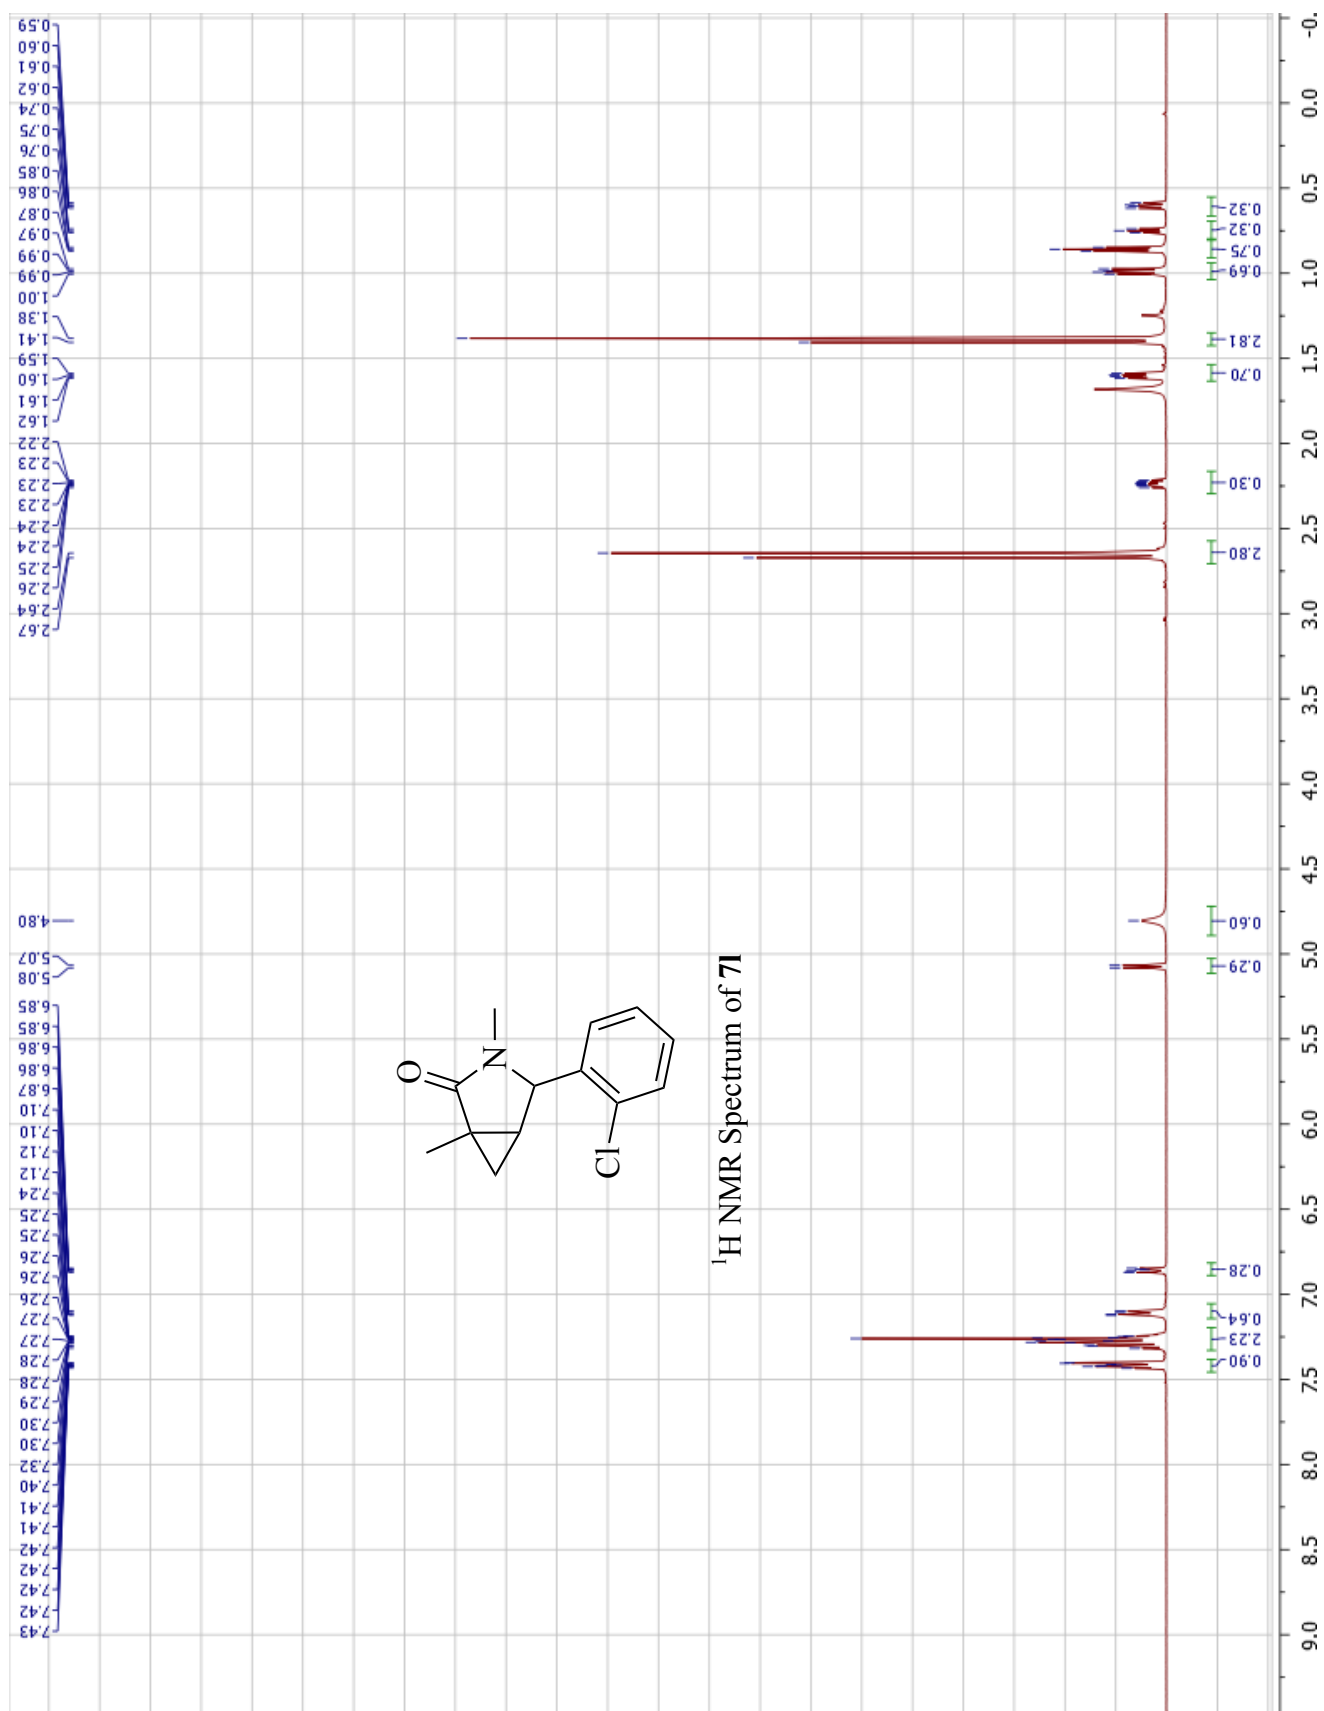



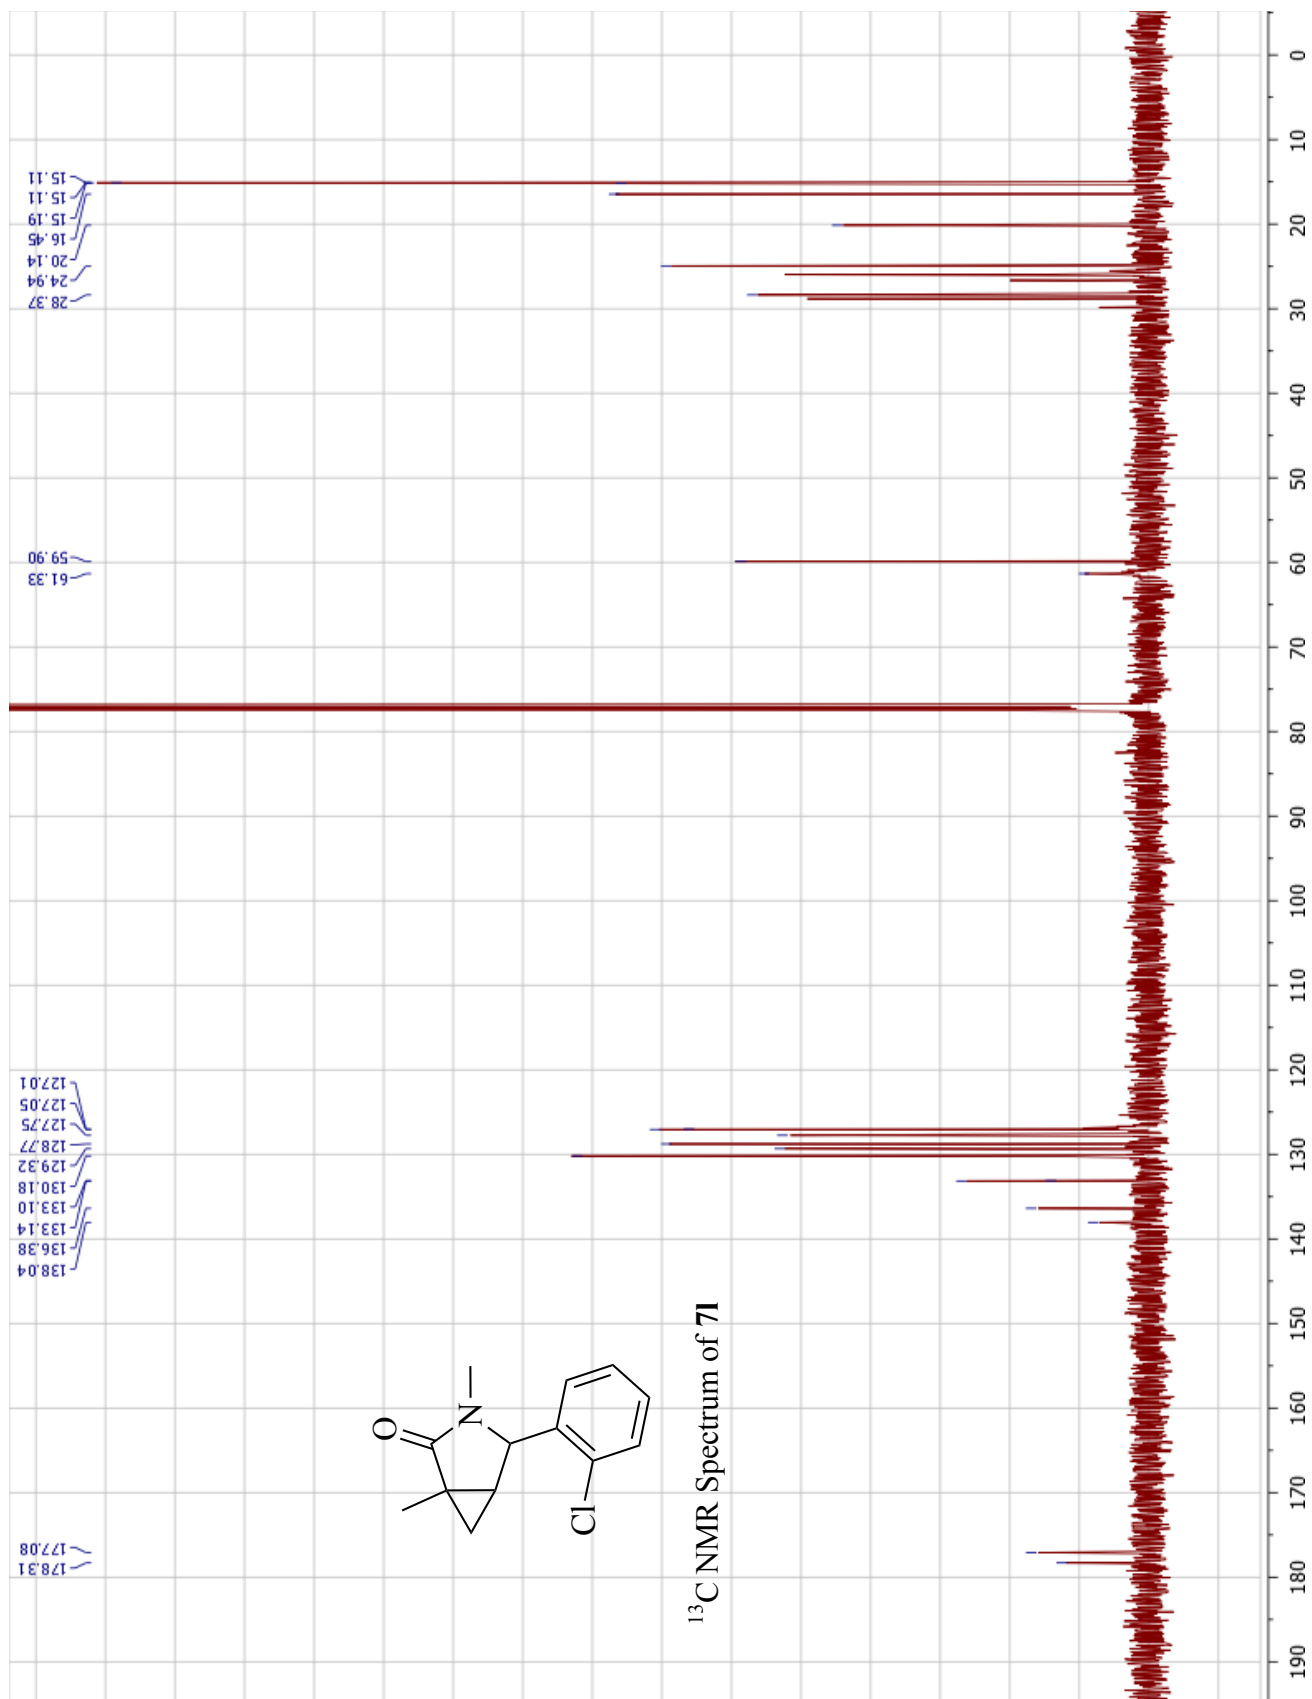

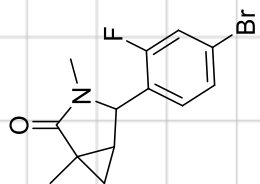

<sup>1</sup>H NMR Spectrum of 7m  
in crude reaction mixture  
dr (*endo:exo*) = 72:28

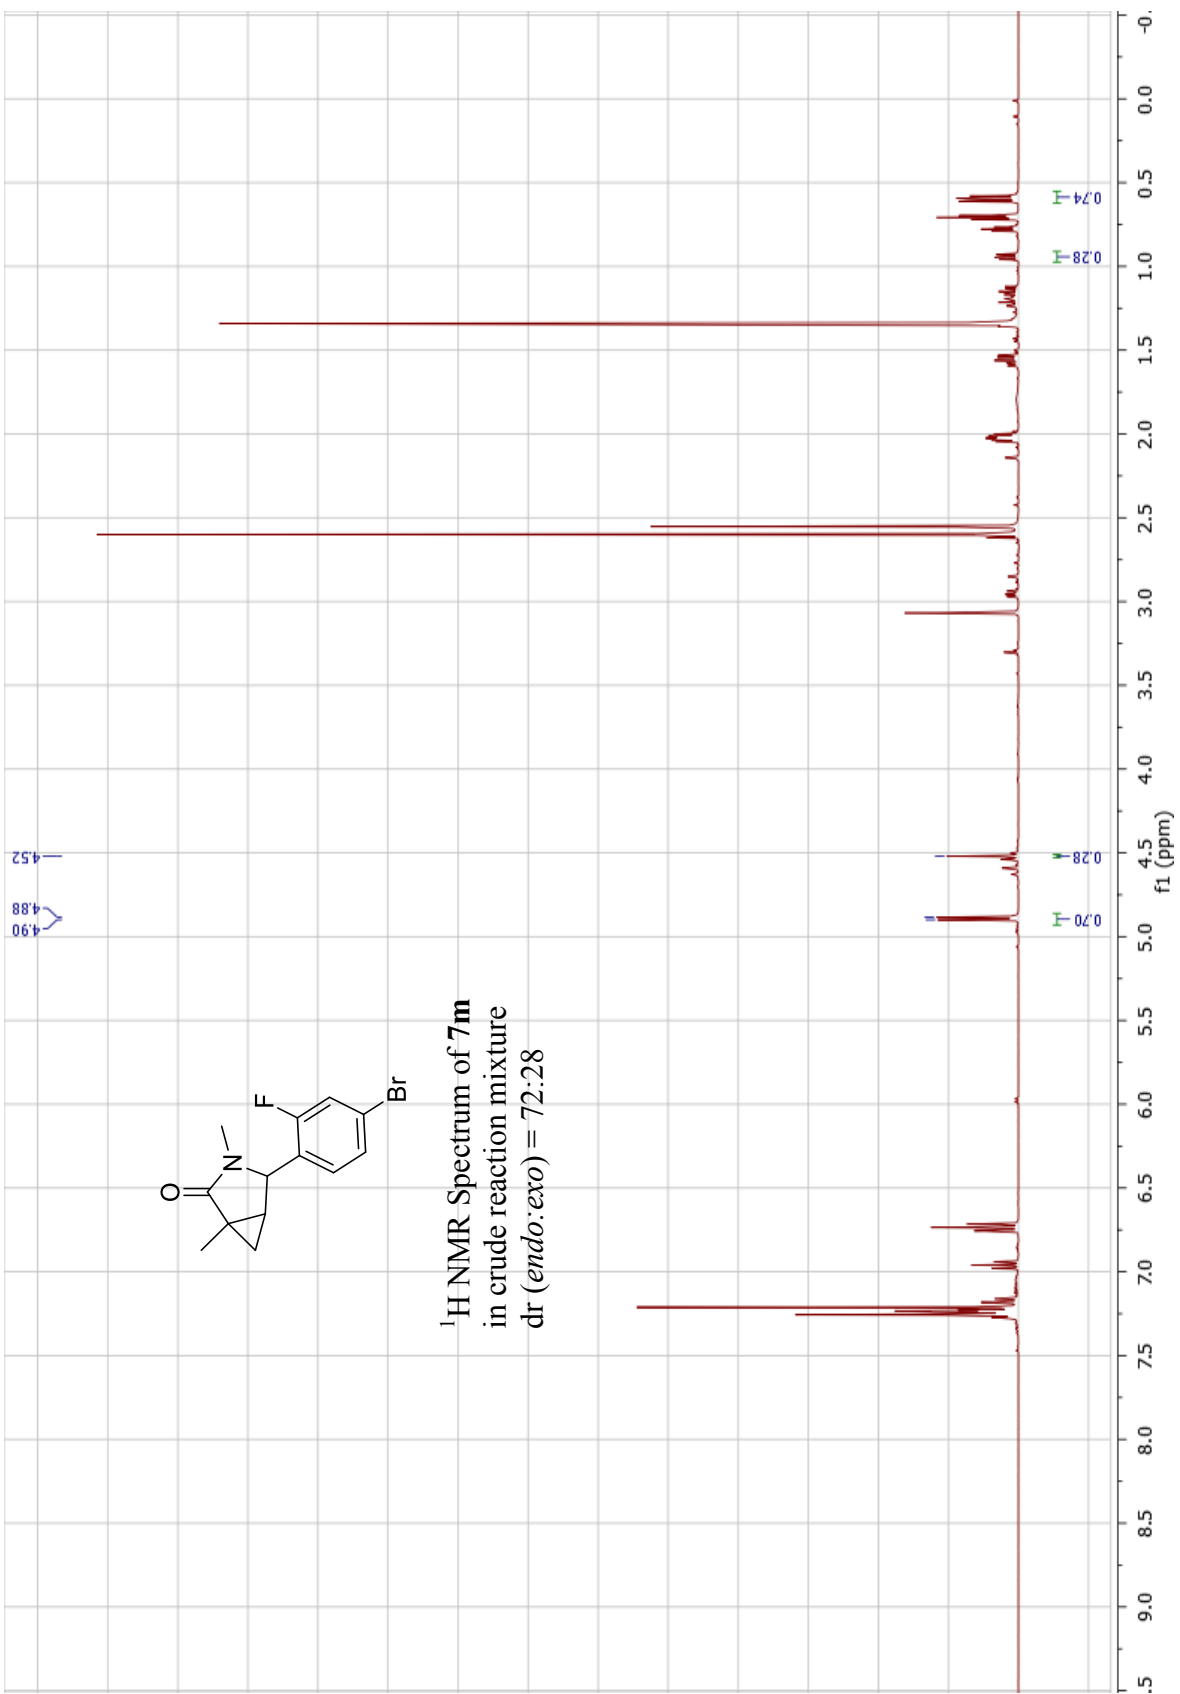

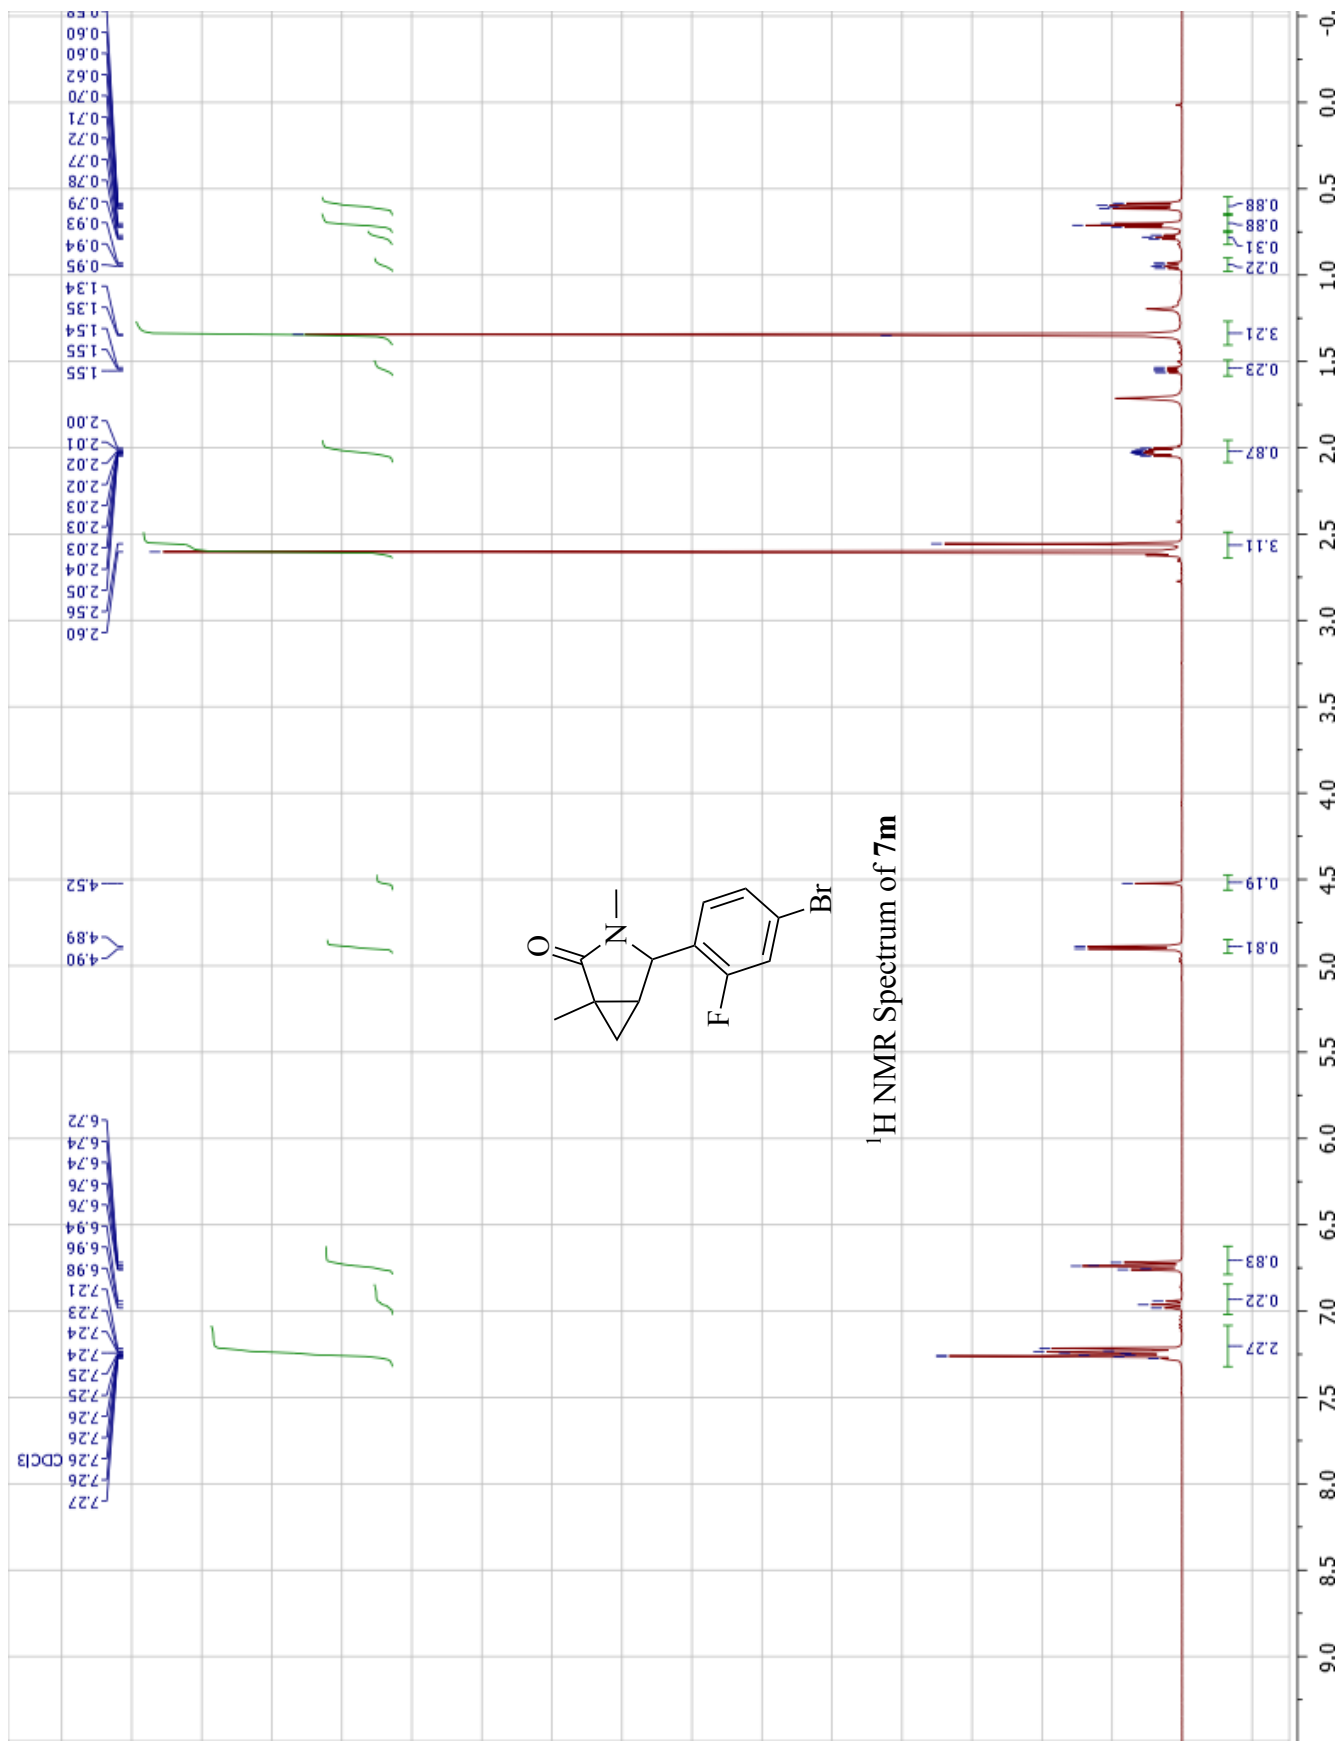

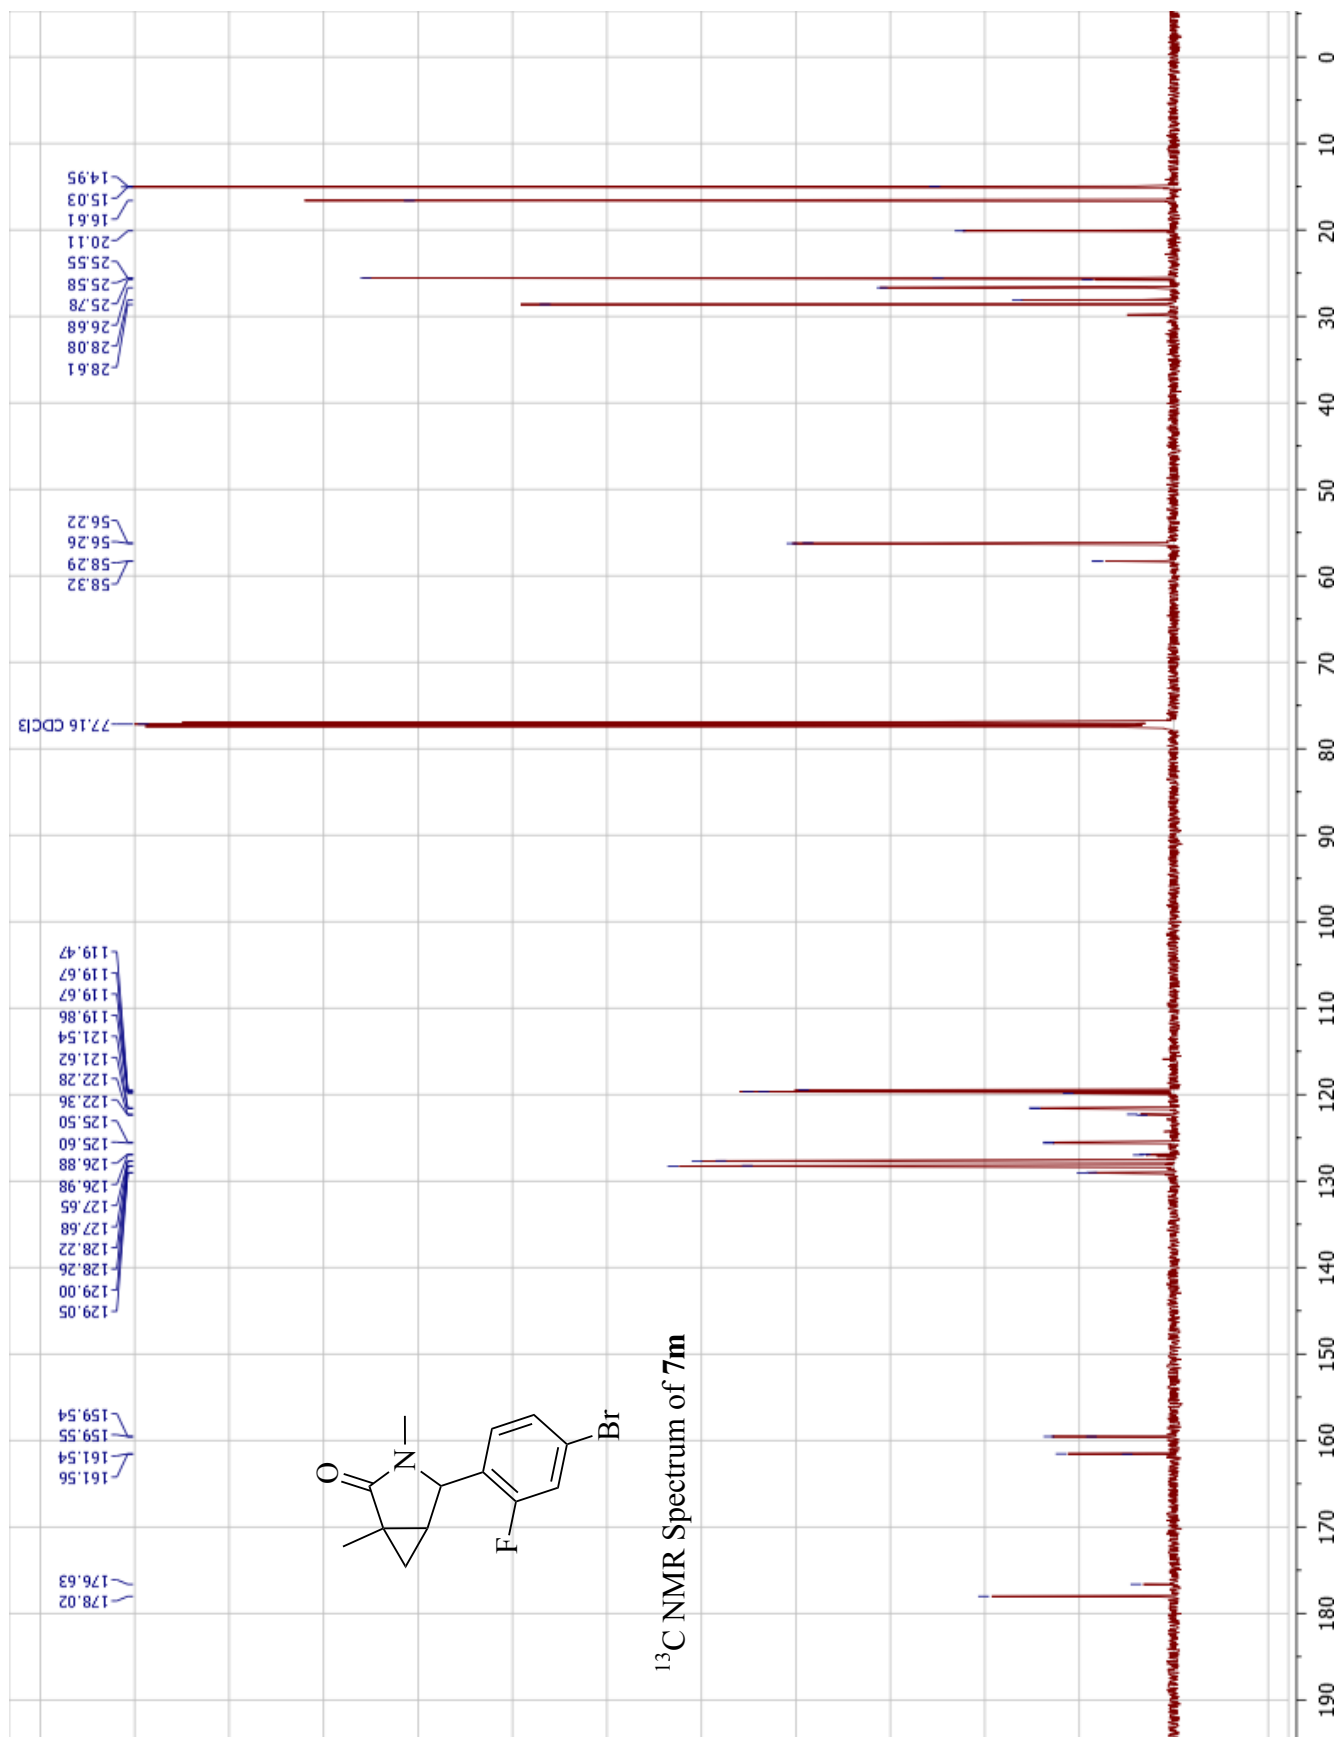

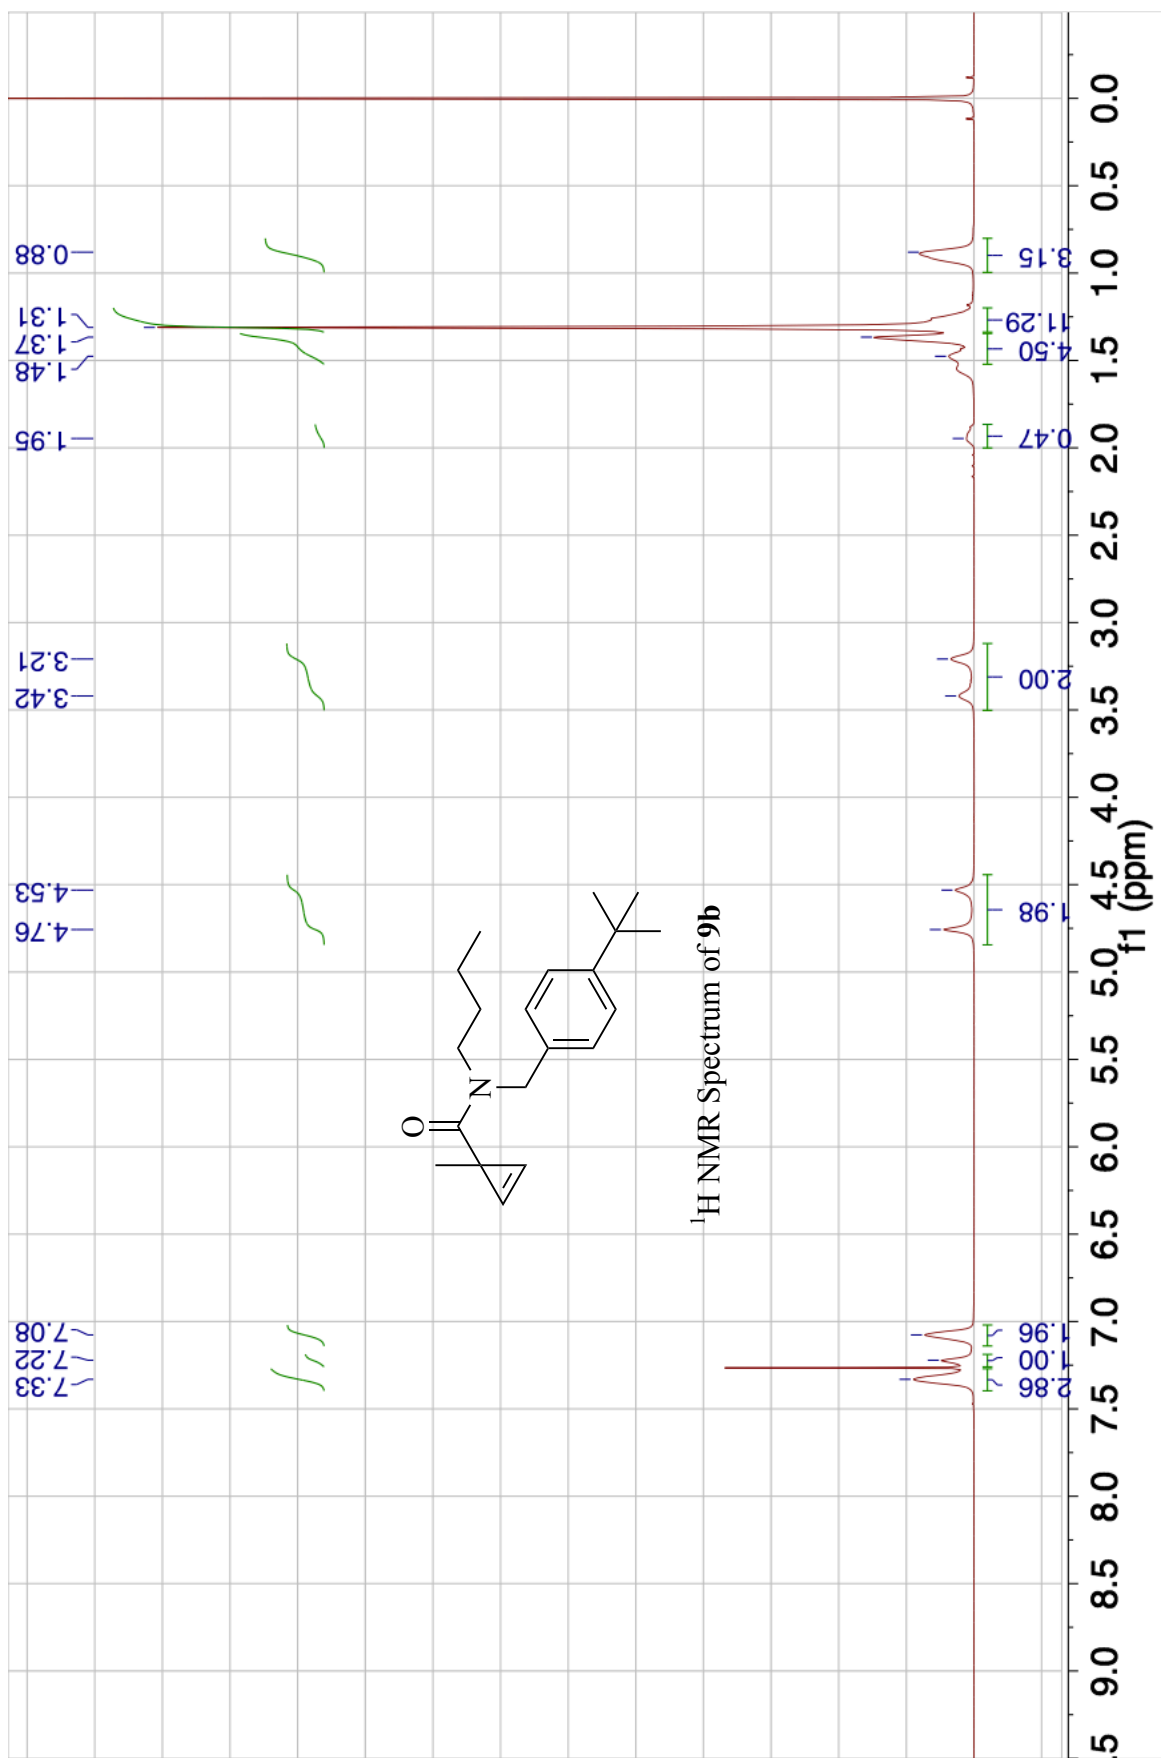

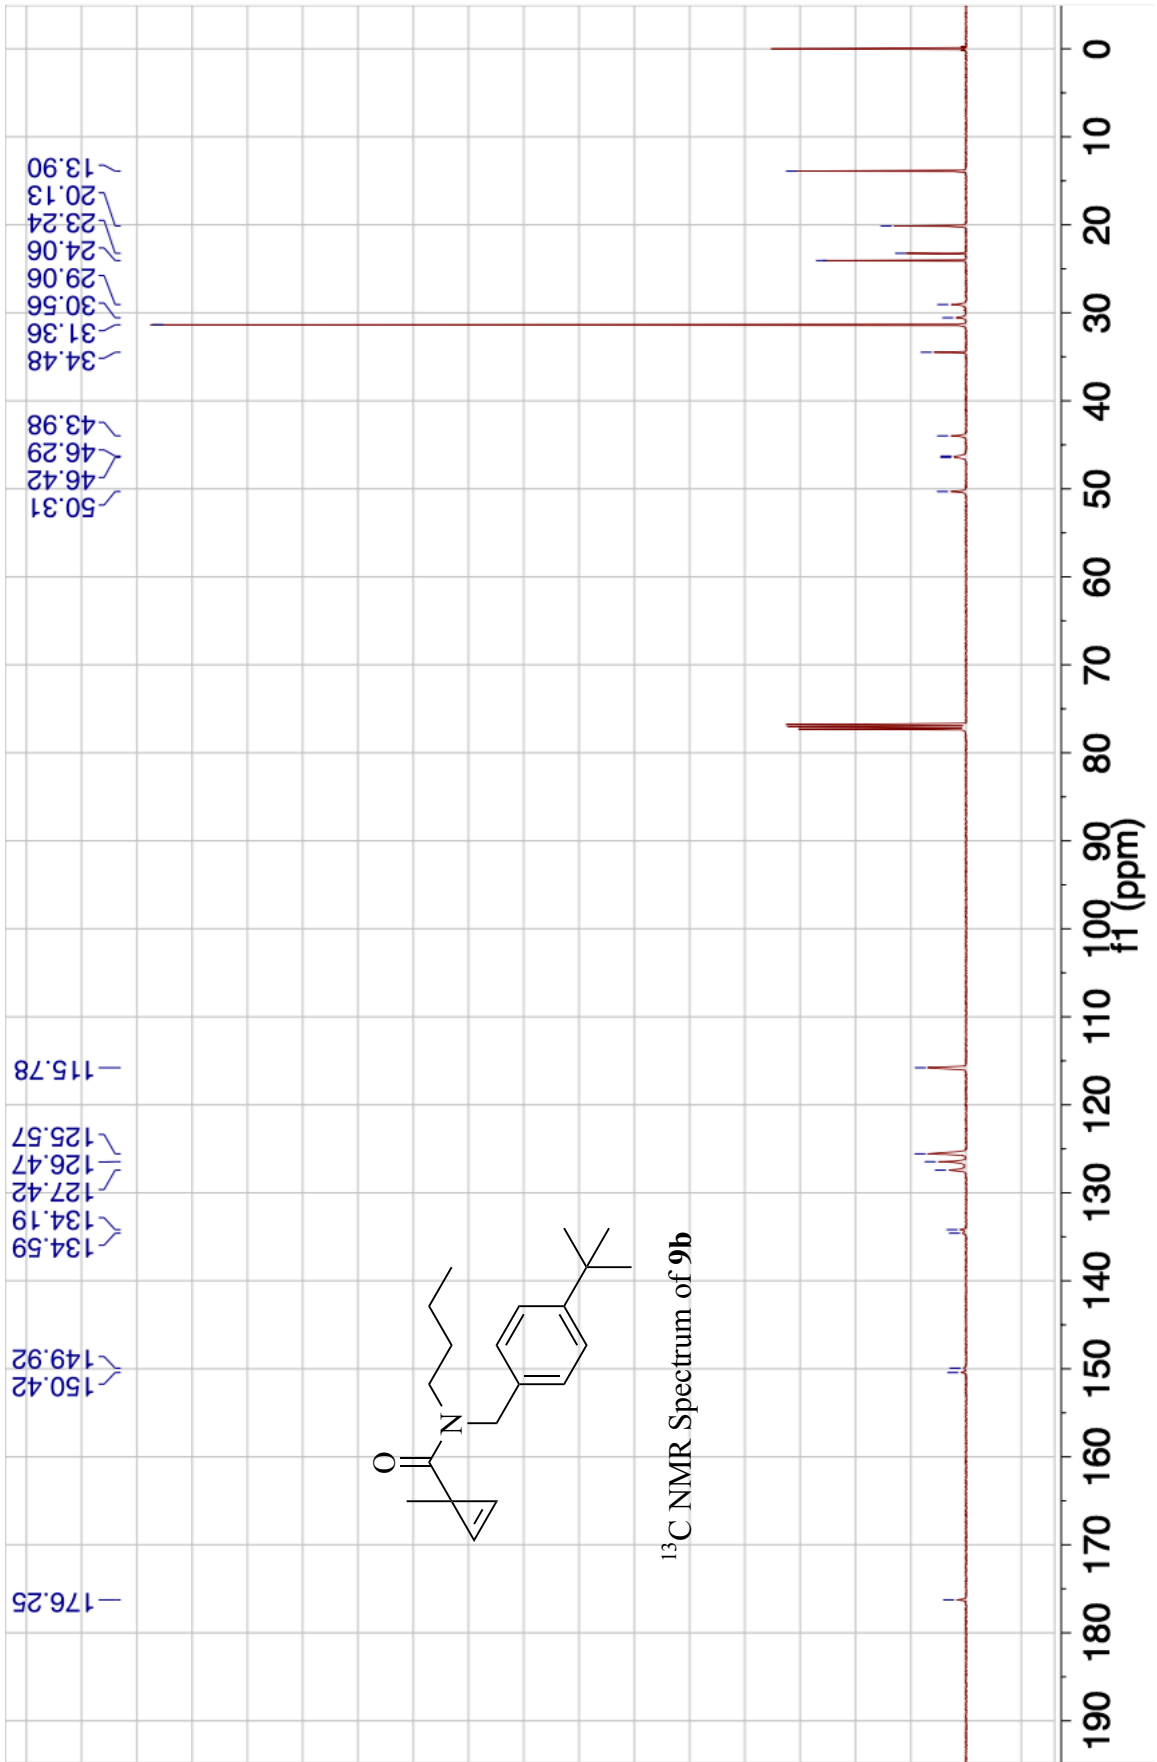

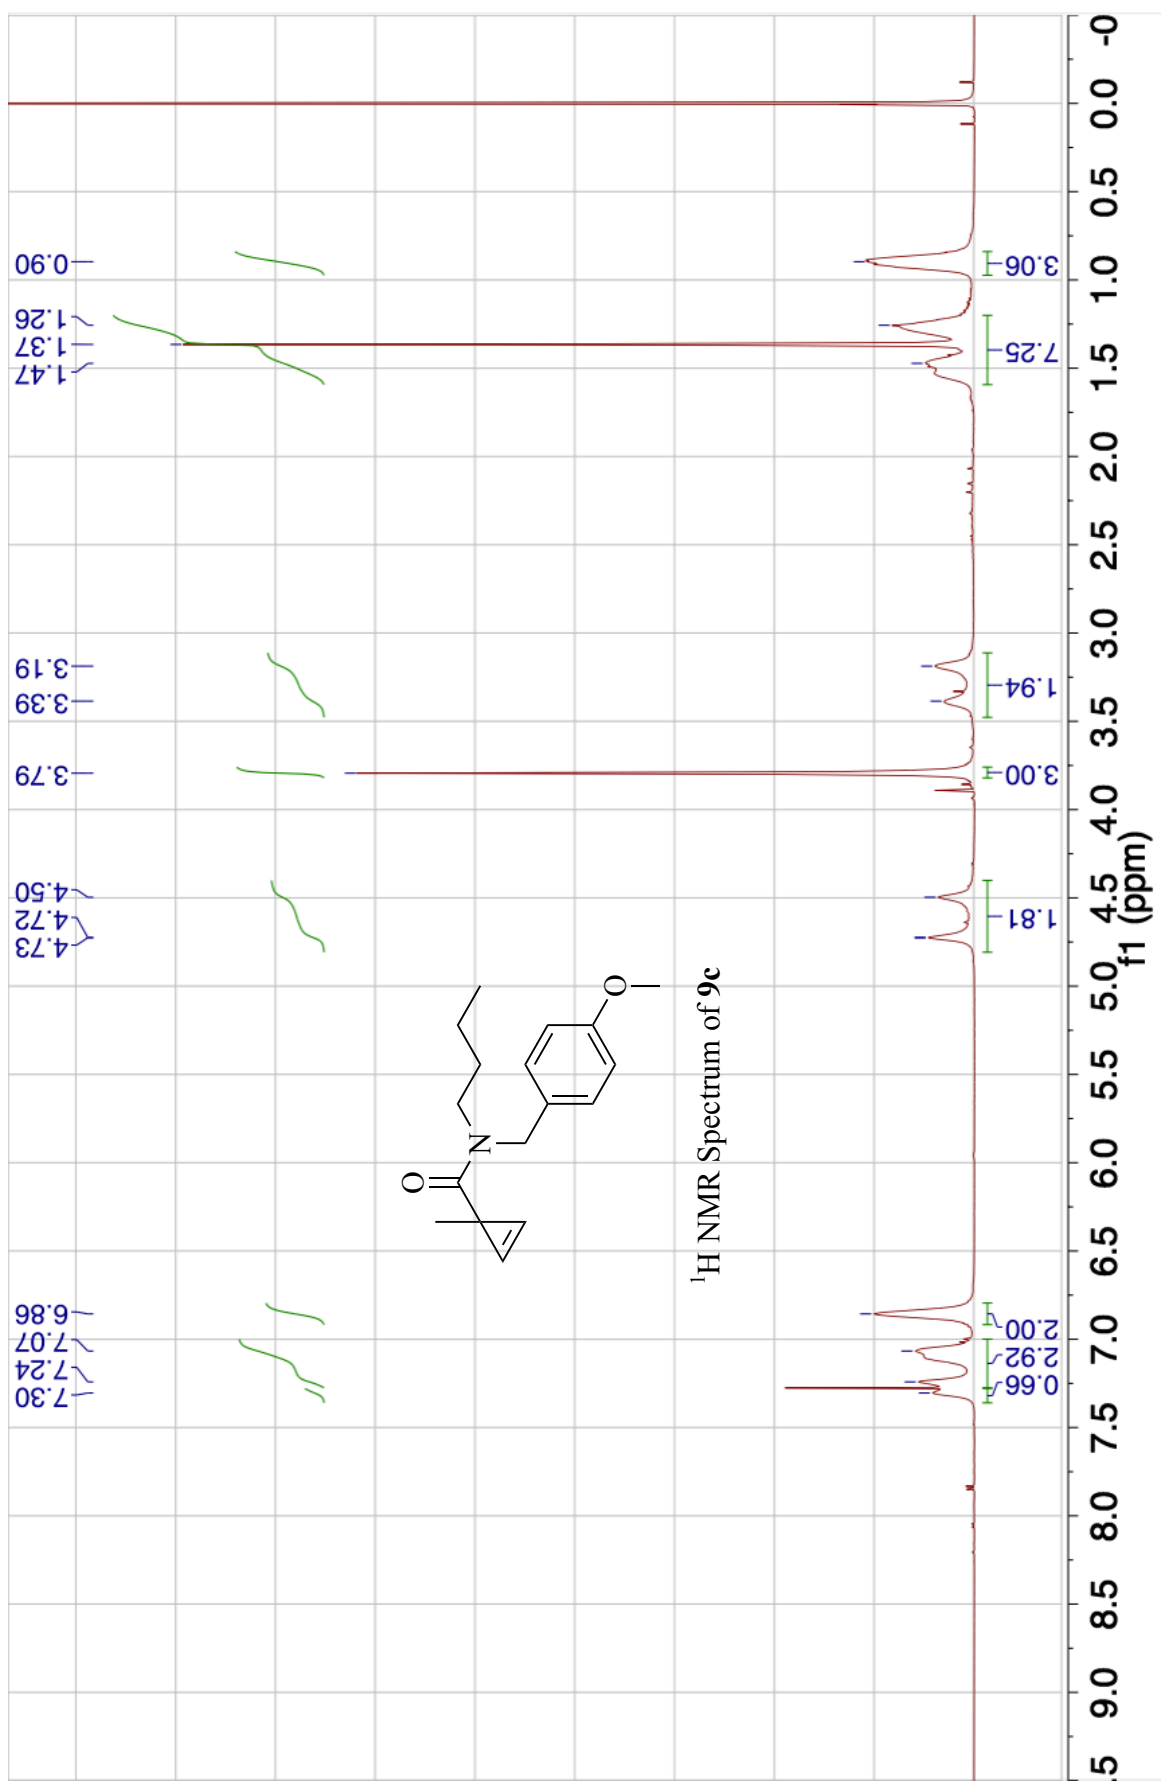

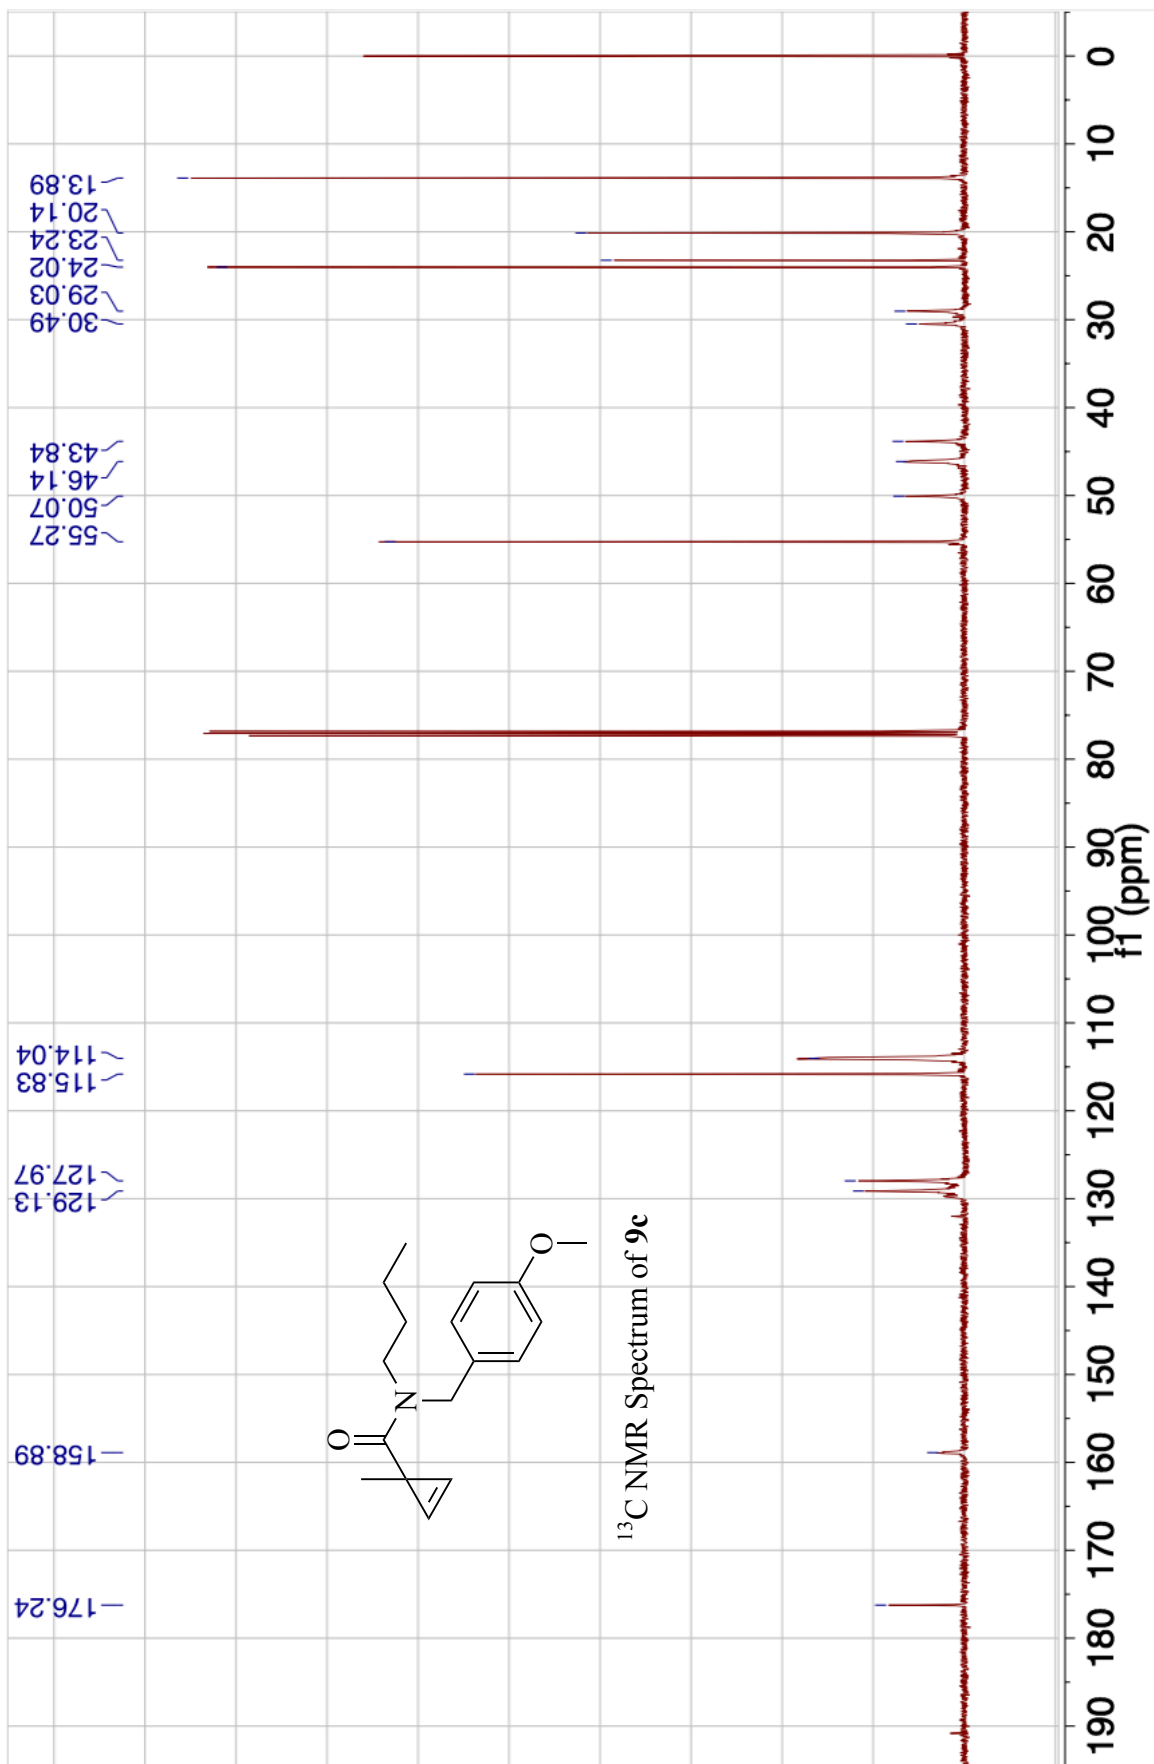



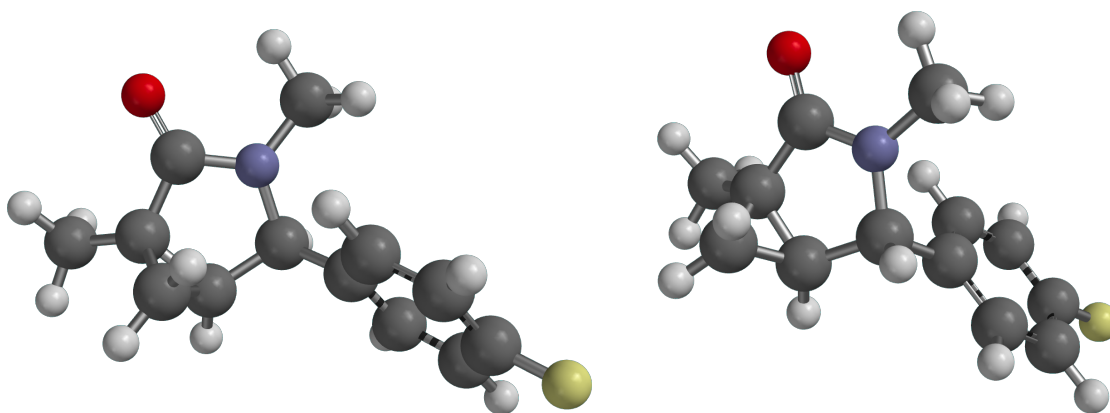

**Figure 1.** Geometries of *endo-7j* (left) and *exo-7j* (right) optimized by DFT (b3lyp 6-311+G\*\*) in THF.

**Table 1.** Cartesian coordinates of atomic centers and calculated thermodynamic parameters of the optimized structure of *endo-7j*.

| Atom | X         | Y         | Z         | Thermodynamics   |
|------|-----------|-----------|-----------|------------------|
| H    | -1.184794 | -2.163768 | -1.017460 | ZPE              |
| C    | -1.265710 | -1.289130 | -0.384014 | 639.15 kJ/mol    |
| C    | -2.592485 | -0.857311 | 0.200052  |                  |
| N    | -1.310126 | 1.056018  | -0.252156 | H°               |
| C    | -2.553920 | 0.652222  | 0.189908  | -733.564217 au   |
| C    | -0.511583 | -0.027882 | -0.826723 |                  |
| C    | -1.524845 | -1.475998 | 1.084284  | S°               |
| H    | -1.010494 | -0.854626 | 1.807295  | 494.09 J/(mol*K) |
| H    | -0.563451 | 0.034406  | -1.924099 |                  |
| H    | -1.713478 | -2.489911 | 1.419282  | G°               |
| O    | -3.466053 | 1.396086  | 0.501466  | -733.615783 au   |
| C    | -3.924354 | -1.524496 | -0.034819 |                  |
| H    | -3.822816 | -2.612188 | -0.006579 | Cv               |
| H    | -4.342966 | -1.243177 | -1.005110 | 232.10 J/(mol*K) |
| H    | -4.639304 | -1.223901 | 0.734918  |                  |
| C    | 0.957731  | -0.010150 | -0.438146 |                  |
| C    | 3.648023  | -0.121049 | 0.246786  |                  |
| C    | 1.397021  | 0.455662  | 0.804838  |                  |
| C    | 1.904510  | -0.519337 | -1.332352 |                  |
| C    | 3.255031  | -0.585195 | -0.998043 |                  |
| C    | 2.744494  | 0.404568  | 1.156174  |                  |
| H    | 0.683357  | 0.876430  | 1.502886  |                  |
| H    | 1.585283  | -0.871343 | -2.308260 |                  |
| H    | 3.993801  | -0.977946 | -1.685562 |                  |
| H    | 3.095405  | 0.768872  | 2.113846  |                  |
| F    | 4.961089  | -0.171127 | 0.581112  |                  |
| C    | -1.024819 | 2.449181  | -0.543642 |                  |
| H    | -0.062856 | 2.752222  | -0.124416 |                  |
| H    | -1.818851 | 3.051102  | -0.103160 |                  |
| H    | -1.003888 | 2.626657  | -1.626044 |                  |

**Table 2.** Cartesian coordinates of atomic centers and calculated thermodynamic parameters of the optimized structure of *exo-7j*.

| Atom | X         | Y         | Z         | Thermodynamics   |
|------|-----------|-----------|-----------|------------------|
| H    | -0.729529 | -2.028550 | 0.903651  | ZPE              |
| C    | -1.296578 | -1.106674 | 0.879808  | 638.64 kJ/mol    |
| C    | -2.419492 | -0.898457 | -0.113391 |                  |
| N    | -1.326720 | 1.142116  | 0.214810  | H°               |
| C    | -2.357934 | 0.562888  | -0.487444 | -733.566579 au   |
| C    | -0.519334 | 0.209601  | 1.001296  |                  |
| C    | -2.721087 | -1.101487 | 1.360573  | S°               |
| H    | -3.078354 | -0.259253 | 1.944319  | 454.31 J/(mol*K) |
| H    | -3.154654 | -2.057110 | 1.633517  |                  |
| O    | -3.092835 | 1.138820  | -1.270825 | G°               |
| C    | -2.870228 | -1.881232 | -1.163548 | -733.618169 au   |
| H    | -2.870127 | -2.900226 | -0.768763 |                  |
| H    | -2.215454 | -1.854463 | -2.039129 | Cv               |
| H    | -3.882340 | -1.639543 | -1.497295 | 232.36 J/(mol*K) |
| C    | 0.916821  | 0.091151  | 0.509511  |                  |
| C    | 3.535984  | -0.219868 | -0.356257 |                  |
| C    | 1.964353  | -0.012177 | 1.427672  |                  |
| C    | 1.214526  | 0.039989  | -0.856220 |                  |
| C    | 2.525214  | -0.113612 | -1.299594 |                  |
| C    | 3.283054  | -0.172280 | 1.004563  |                  |
| H    | 1.753576  | 0.033122  | 2.491414  |                  |
| H    | 0.416165  | 0.133714  | -1.583769 |                  |
| H    | 2.767887  | -0.147908 | -2.354532 |                  |
| H    | 4.102025  | -0.250906 | 1.708737  |                  |
| F    | 4.814905  | -0.365639 | -0.781429 |                  |
| H    | -0.494100 | 0.543226  | 2.047307  |                  |
| C    | -1.069635 | 2.568788  | 0.199842  |                  |
| H    | -1.786609 | 3.029956  | -0.478842 |                  |
| H    | -0.055739 | 2.782715  | -0.151334 |                  |
| H    | -1.191164 | 3.000824  | 1.199639  |                  |

# X-Ray Crystallography Data for *exo-7j*

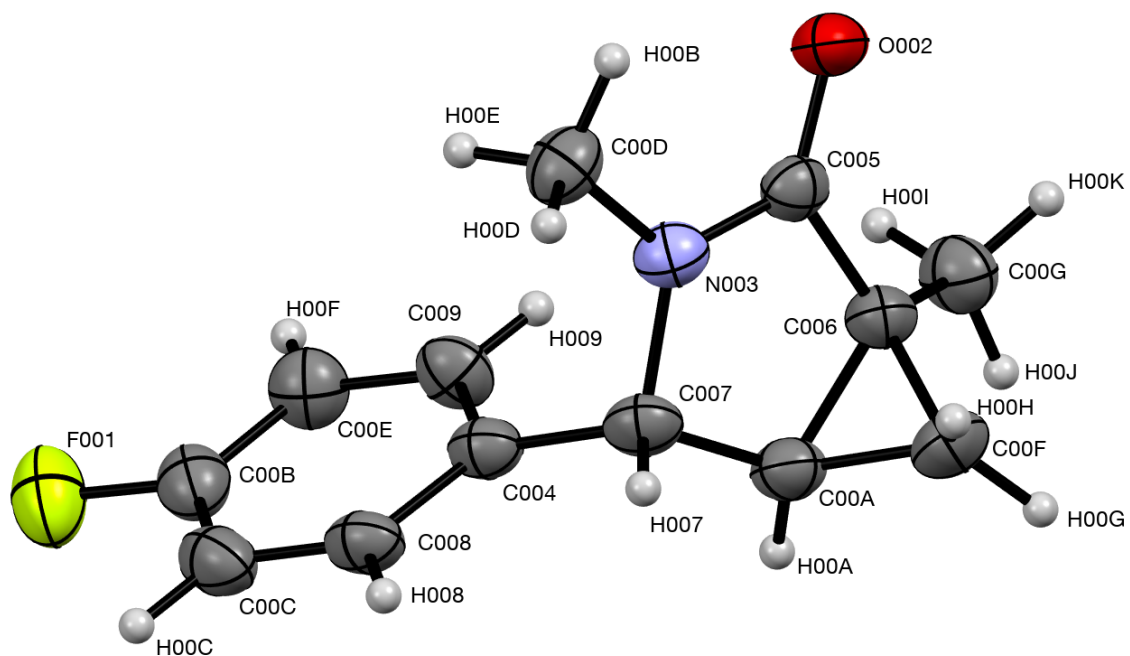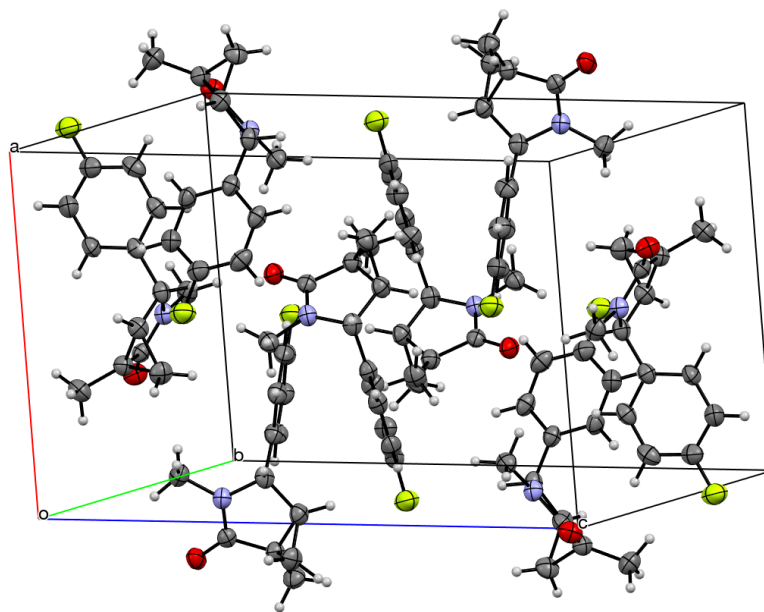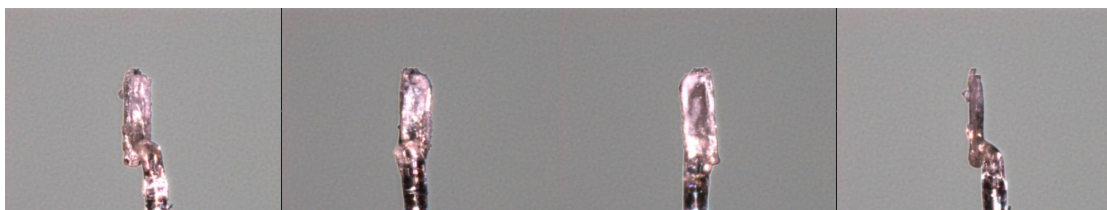

**Table 1 Crystal data and structure refinement for *exo-7j*.**

|                                             |                                                               |
|---------------------------------------------|---------------------------------------------------------------|
| Identification code                         | ANNA_01092017_Cl_f2631_23                                     |
| Empirical formula                           | C <sub>13</sub> H <sub>14</sub> FNO                           |
| Formula weight                              | 219.25                                                        |
| Temperature/K                               | 150.00(10)                                                    |
| Crystal system                              | orthorhombic                                                  |
| Space group                                 | Pbca                                                          |
| a/Å                                         | 11.0397(5)                                                    |
| b/Å                                         | 10.6042(3)                                                    |
| c/Å                                         | 19.2081(9)                                                    |
| α/°                                         | 90                                                            |
| β/°                                         | 90                                                            |
| γ/°                                         | 90                                                            |
| Volume/Å <sup>3</sup>                       | 2248.64(16)                                                   |
| Z                                           | 8                                                             |
| ρ <sub>calc</sub> /g/cm <sup>3</sup>        | 1.295                                                         |
| μ/mm <sup>-1</sup>                          | 0.766                                                         |
| F(000)                                      | 928.0                                                         |
| Crystal size/mm <sup>3</sup>                | 0.393 × 0.123 × 0.052                                         |
| Radiation                                   | CuKα (λ = 1.54184)                                            |
| 2θ range for data collection/°              | 9.208 to 152.184                                              |
| Index ranges                                | -13 ≤ h ≤ 13, -13 ≤ k ≤ 8, -24 ≤ l ≤ 22                       |
| Reflections collected                       | 15534                                                         |
| Independent reflections                     | 2317 [R <sub>int</sub> = 0.0633, R <sub>sigma</sub> = 0.0299] |
| Data/restraints/parameters                  | 2317/0/147                                                    |
| Goodness-of-fit on F <sup>2</sup>           | 1.054                                                         |
| Final R indexes [I ≥ 2σ (I)]                | R <sub>1</sub> = 0.0652, wR <sub>2</sub> = 0.1715             |
| Final R indexes [all data]                  | R <sub>1</sub> = 0.0736, wR <sub>2</sub> = 0.1812             |
| Largest diff. peak/hole / e Å <sup>-3</sup> | 0.32/-0.26                                                    |

**Table 2 Fractional Atomic Coordinates ( $\times 10^4$ ) and Equivalent Isotropic Displacement Parameters ( $\text{\AA}^2 \times 10^3$ ) for *exo-7j*.  $U_{eq}$  is defined as 1/3 of the trace of the orthogonalised  $U_{IJ}$  tensor.**

| Atom | x          | y          | z          | U(eq)   |
|------|------------|------------|------------|---------|
| F001 | -426.0(13) | 6524.0(16) | 4438.9(7)  | 59.0(4) |
| O002 | 5979.8(14) | 4831.1(13) | 2931.1(8)  | 42.6(4) |
| N003 | 4591.2(16) | 6439.0(15) | 2903.5(8)  | 36.1(4) |
| C004 | 2957.0(19) | 7277.1(16) | 3638.6(10) | 34.6(4) |
| C005 | 5560.7(18) | 5827.1(16) | 3161.4(10) | 33.5(4) |
| C006 | 6040.4(18) | 6544.5(16) | 3772.1(10) | 35.4(4) |
| C007 | 4184(2)    | 7525.3(17) | 3319.8(10) | 36.5(5) |
| C008 | 1973(2)    | 8049.3(17) | 3484.5(11) | 39.2(5) |
| C009 | 2767.4(19) | 6248.4(18) | 4080.9(10) | 39.9(5) |
| C00A | 5196(2)    | 7658.9(16) | 3854.6(11) | 38.5(5) |
| C00B | 693(2)     | 6783(2)    | 4180.4(11) | 42.5(5) |
| C00C | 834(2)     | 7812(2)    | 3754.4(11) | 45.0(5) |
| C00D | 3920(2)    | 6033(2)    | 2292.1(11) | 43.3(5) |
| C00E | 1635(2)    | 5992(2)    | 4353.3(11) | 43.8(5) |
| C00F | 6449(2)    | 7863.0(18) | 3576.0(12) | 44.5(5) |
| C00G | 6620(2)    | 5822(2)    | 4353.8(11) | 45.7(5) |

**Table 3 Anisotropic Displacement Parameters ( $\text{\AA}^2 \times 10^3$ ) for *exo-7j*. The Anisotropic displacement factor exponent takes the form:  $-2\pi^2[h^2a^{*2}U_{11}+2hka^*b^*U_{12}+\dots]$ .**

| Atom | $U_{11}$ | $U_{22}$ | $U_{33}$ | $U_{23}$ | $U_{13}$ | $U_{12}$ |
|------|----------|----------|----------|----------|----------|----------|
| F001 | 40.2(8)  | 86.3(10) | 50.4(8)  | -4.0(7)  | 2.1(6)   | -0.7(7)  |
| O002 | 43.7(9)  | 31.6(7)  | 52.6(8)  | -9.5(6)  | 4.6(6)   | -1.6(6)  |
| N003 | 41.6(9)  | 33.7(8)  | 32.9(8)  | -1.9(6)  | -1.0(7)  | -1.0(6)  |
| C004 | 41.7(11) | 27.6(8)  | 34.3(9)  | -0.6(6)  | -4.2(8)  | 2.8(7)   |
| C005 | 35.5(10) | 29.0(8)  | 35.9(9)  | 0.6(7)   | 3.8(7)   | -4.9(7)  |
| C006 | 37.6(10) | 29.0(8)  | 39.6(10) | -1.8(7)  | -0.4(8)  | -0.5(7)  |
| C007 | 46.2(11) | 25.6(8)  | 37.8(9)  | 1.9(7)   | -1.1(8)  | 1.8(7)   |
| C008 | 47.9(12) | 28.4(8)  | 41.4(10) | -1.1(7)  | -9.1(9)  | 6.5(8)   |
| C009 | 43.4(11) | 34.8(9)  | 41.4(10) | 8.3(7)   | -1.6(9)  | 7.1(8)   |
| C00A | 43.9(11) | 28.6(8)  | 42.9(10) | -3.7(7)  | -1.7(8)  | 0.1(7)   |
| C00B | 39.8(11) | 52.2(11) | 35.6(9)  | -7.5(8)  | -1.5(8)  | 1.1(9)   |
| C00C | 45.7(12) | 42.9(10) | 46.5(11) | -7.1(8)  | -9.7(9)  | 12.2(8)  |
| C00D | 46.5(12) | 47.0(11) | 36.4(10) | -1.5(8)  | -3.1(9)  | -7.3(9)  |
| C00E | 46.7(12) | 44.4(10) | 40.3(10) | 6.6(8)   | -1.1(9)  | 0.6(9)   |
| C00F | 46.6(12) | 30.6(9)  | 56.2(12) | -3.5(8)  | -0.2(10) | -7.9(8)  |
| C00G | 46.8(12) | 44.3(10) | 46.0(11) | 0.5(8)   | -8.6(9)  | 6.1(9)   |

**Table 4 Bond Lengths for *exo-7j*.**

| Atom | Atom | Length/Å | Atom | Atom | Length/Å |
|------|------|----------|------|------|----------|
| F001 | C00B | 1.359(3) | C006 | C00A | 1.514(3) |
| O002 | C005 | 1.235(2) | C006 | C00F | 1.516(3) |
| N003 | C005 | 1.346(3) | C006 | C00G | 1.498(3) |
| N003 | C007 | 1.473(2) | C007 | C00A | 1.524(3) |
| N003 | C00D | 1.454(3) | C008 | C00C | 1.383(3) |
| C004 | C007 | 1.509(3) | C009 | C00E | 1.383(3) |
| C004 | C008 | 1.392(3) | C00A | C00F | 1.499(3) |
| C004 | C009 | 1.398(3) | C00B | C00C | 1.373(3) |
| C005 | C006 | 1.495(3) | C00B | C00E | 1.376(3) |

**Table 5 Bond Angles for *exo-7j*.**

| Atom | Atom | Atom | Angle/°    | Atom | Atom | Atom | Angle/°    |
|------|------|------|------------|------|------|------|------------|
| C005 | N003 | C007 | 114.84(16) | N003 | C007 | C004 | 110.97(15) |
| C005 | N003 | C00D | 124.04(17) | N003 | C007 | C00A | 102.40(16) |
| C00D | N003 | C007 | 120.97(17) | C004 | C007 | C00A | 113.61(16) |
| C008 | C004 | C007 | 120.76(17) | C00C | C008 | C004 | 121.51(19) |
| C008 | C004 | C009 | 118.11(19) | C00E | C009 | C004 | 121.24(18) |
| C009 | C004 | C007 | 121.11(17) | C006 | C00A | C007 | 107.96(15) |
| O002 | C005 | N003 | 125.33(18) | C00F | C00A | C006 | 60.45(13)  |
| O002 | C005 | C006 | 125.70(18) | C00F | C00A | C007 | 116.69(18) |
| N003 | C005 | C006 | 108.97(16) | F001 | C00B | C00C | 118.8(2)   |
| C005 | C006 | C00A | 105.15(16) | F001 | C00B | C00E | 118.4(2)   |
| C005 | C006 | C00F | 112.31(16) | C00C | C00B | C00E | 122.8(2)   |
| C005 | C006 | C00G | 118.45(16) | C00B | C00C | C008 | 118.11(19) |
| C00A | C006 | C00F | 59.29(13)  | C00B | C00E | C009 | 118.18(19) |
| C00G | C006 | C00A | 125.73(18) | C00A | C00F | C006 | 60.26(12)  |
| C00G | C006 | C00F | 121.97(18) |      |      |      |            |

**Table 6 Hydrogen Atom Coordinates ( $\text{\AA} \times 10^4$ ) and Isotropic Displacement Parameters ( $\text{\AA}^2 \times 10^3$ ) for *exo-7j*.**

| Atom | <i>x</i> | <i>y</i> | <i>z</i> | U(eq) |
|------|----------|----------|----------|-------|
| H007 | 4148     | 8296     | 3021     | 44    |
| H008 | 2086     | 8755     | 3187     | 47    |
| H009 | 3429     | 5716     | 4196     | 48    |
| H00A | 4994     | 7965     | 4333     | 46    |
| H00C | 169      | 8346     | 3648     | 54    |
| H00B | 4395     | 5403     | 2037     | 65    |
| H00D | 3767     | 6761     | 1990     | 65    |
| H00E | 3147     | 5662     | 2437     | 65    |
| H00F | 1510     | 5290     | 4652     | 53    |
| H00G | 7044     | 8284     | 3883     | 53    |
| H00H | 6534     | 8061     | 3075     | 53    |
| H00I | 6058     | 5175     | 4522     | 69    |
| H00J | 6818     | 6400     | 4735     | 69    |
| H00K | 7363     | 5420     | 4185     | 69    |

## Experimental

Single crystals of  $\text{C}_{13}\text{H}_{14}\text{FNO}$  [*exo-7j*] were recrystallized from EtOAc. A suitable crystal was selected and mounted by acrylic glue on the glass stick on a SuperNova, Dual, Cu at zero, AtlasS2 diffractometer. The crystal was kept at 150.00(10) K during data collection. Using Olex2 [1], the structure was solved with the ShelXT [2] structure solution program using Intrinsic Phasing and refined with the ShelXL [3] refinement package using Least Squares minimisation.

1. Dolomanov, O.V., Bourhis, L.J., Gildea, R.J., Howard, J.A.K. & Puschmann, H. (2009), *J. Appl. Cryst.* 42, 339-341.
2. Sheldrick, G.M. (2015). *Acta Cryst.* A71, 3-8.
3. Sheldrick, G.M. (2015). *Acta Cryst.* C71, 3-8.

## Crystal structure determination of *exo-7j*

**Crystal Data** for  $\text{C}_{13}\text{H}_{14}\text{FNO}$  ( $M = 219.25$  g/mol): orthorhombic, space group *Pbca* (no. 61),  $a = 11.0397(5)$   $\text{\AA}$ ,  $b = 10.6042(3)$   $\text{\AA}$ ,  $c = 19.2081(9)$   $\text{\AA}$ ,  $V = 2248.64(16)$   $\text{\AA}^3$ ,  $Z = 8$ ,  $T = 150.00(10)$  K,  $\mu(\text{CuK}\alpha) = 0.766$   $\text{mm}^{-1}$ ,  $D_{\text{calc}} = 1.295$   $\text{g/cm}^3$ , 15534 reflections measured ( $9.208^\circ \leq 2\theta \leq 152.184^\circ$ ), 2317 unique ( $R_{\text{int}} = 0.0633$ ,  $R_{\text{sigma}} = 0.0299$ ) which were used in all calculations. The final  $R_1$  was 0.0652 ( $I > 2\sigma(I)$ ) and  $wR_2$  was 0.1812 (all data).

## Refinement model description

Number of restraints - 0, number of constraints - unknown.  
Details:

1. Fixed Uiso
  - At 1.2 times of:
    - All C(H) groups, All C(H,H) groups
  - At 1.5 times of:
    - All C(H,H,H) groups
- 2.a Ternary CH refined with riding coordinates:
  - C007(H007), C00A(H00A)
- 2.b Secondary CH2 refined with riding coordinates:
  - C00F(H00G,H00H)
- 2.c Aromatic/amide H refined with riding coordinates:
  - C008(H008), C009(H009), C00C(H00C), C00E(H00F)
- 2.d Idealised Me refined as rotating group:
  - C00D(H00B,H00D,H00E), C00G(H00I,H00J,H00K)

This report has been created with Olex2, compiled on 2017.03.28 svn.r3405 for OlexSys.



## GC of 7a

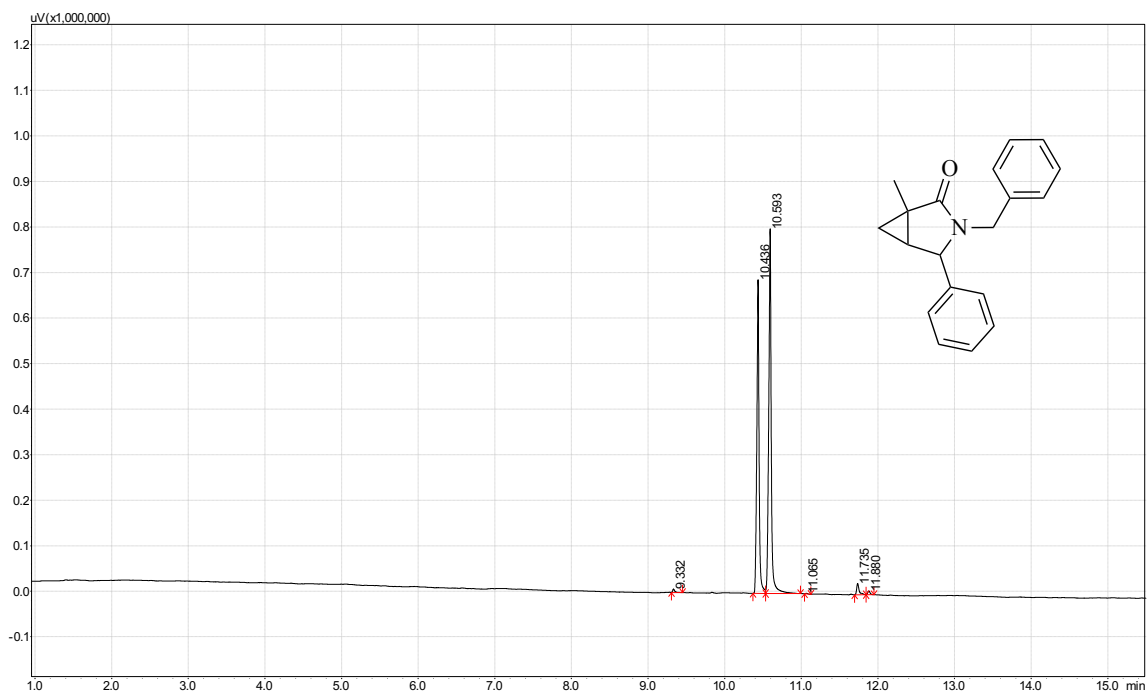

| Peak# | Ret.Time | Area      | Height   | Conc.    |
|-------|----------|-----------|----------|----------|
| 1     | 9.332    | 16807.2   | 8285.4   | 0.55690  |
| 2     | 10.436   | 1397102.4 | 666254.8 | 44.78205 |
| 3     | 10.593   | 1817771.4 | 778658.9 | 52.33725 |
| 4     | 11.065   | 2157.5    | 1237.8   | 0.08320  |
| 5     | 11.735   | 58170.3   | 25284.1  | 1.69946  |
| 6     | 11.880   | 17610.8   | 8050.9   | 0.54114  |

Time profile of the analytical run for **7a** (preparative run was quenched after 10 minutes)

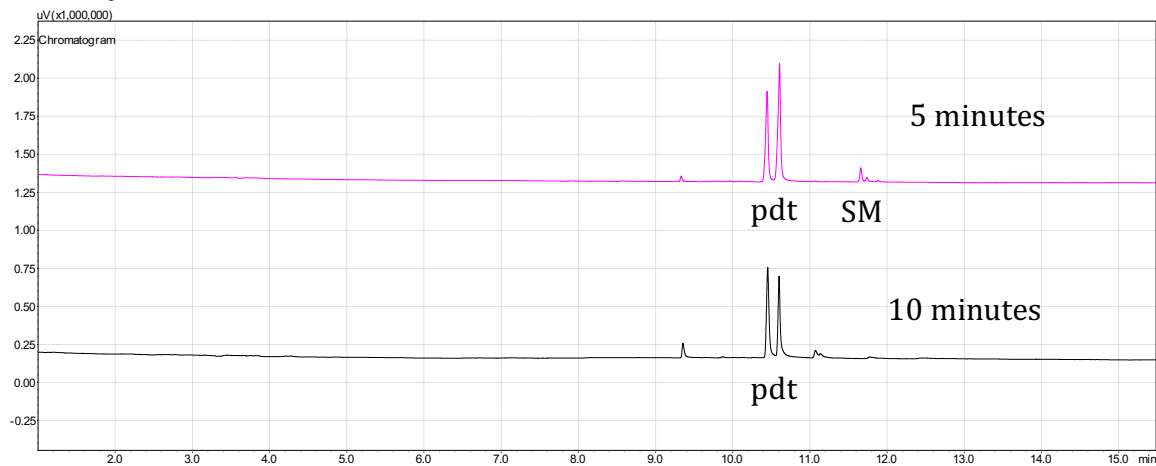

## GC of 7d

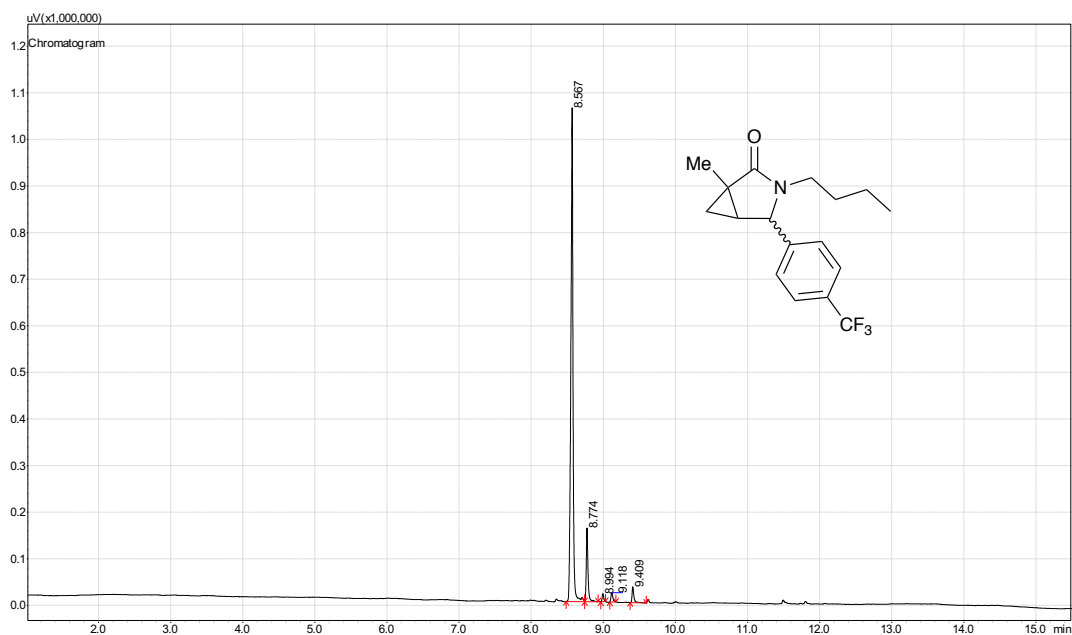

| Peak# | Ret.Time | Area      | Height   | Conc.    |
|-------|----------|-----------|----------|----------|
| 1     | 8.567    | 2177559.3 | 970308.1 | 81.66344 |
| 2     | 8.774    | 263619.0  | 149718.9 | 12.60070 |
| 3     | 8.994    | 26296.4   | 16713.8  | 1.40667  |
| 4     | 9.118    | 36327.8   | 18547.8  | 1.56102  |
| 5     | 9.409    | 62571.4   | 32890.8  | 2.76817  |

Time profile of the analytical run for **7d** (preparative run was quenched after 5 minutes)

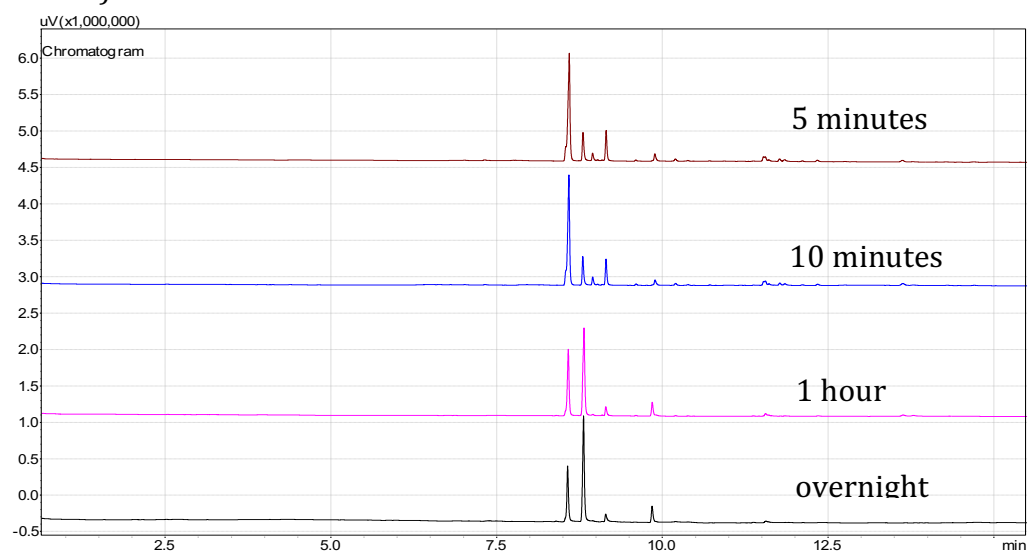

## GC of 7f

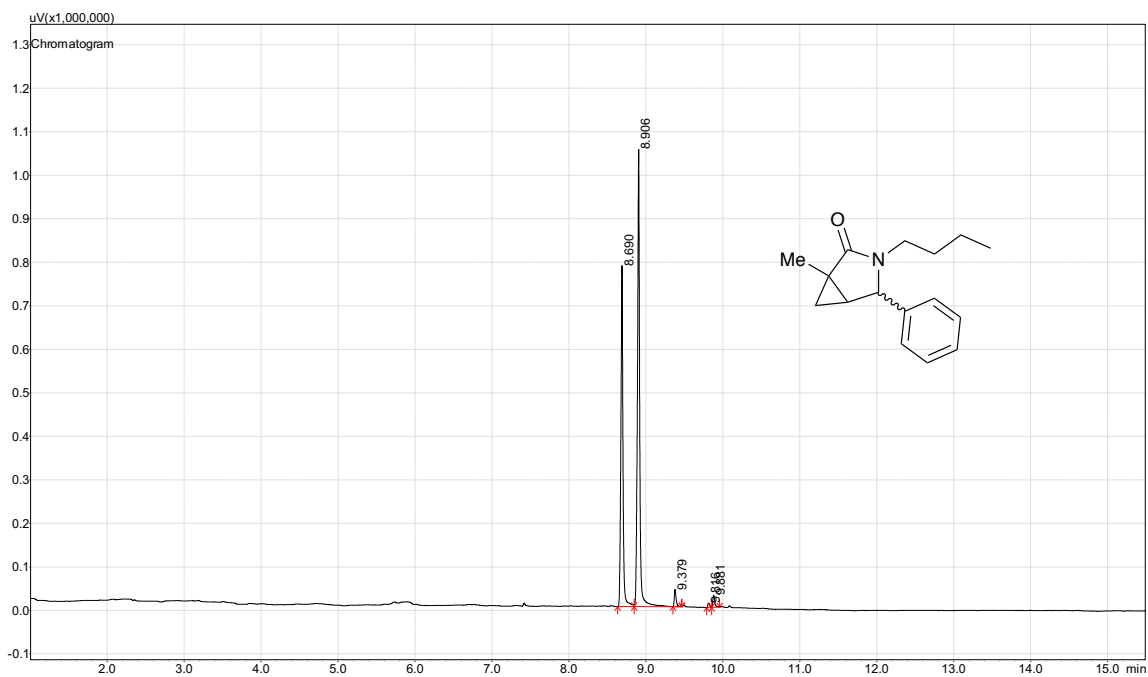

| Peak# | Ret.Time | Area      | Height    | Conc.    |
|-------|----------|-----------|-----------|----------|
| 1     | 8.690    | 1479834.7 | 752954.4  | 40.35928 |
| 2     | 8.906    | 2117155.4 | 1036677.8 | 55.56720 |
| 3     | 9.379    | 64009.9   | 38201.0   | 2.04762  |
| 4     | 9.816    | 17499.1   | 10154.8   | 0.54431  |
| 5     | 9.881    | 48043.2   | 27641.0   | 1.48159  |

Time profile of the analytical run for **7f** (preparative run was quenched after running the reaction overnight)

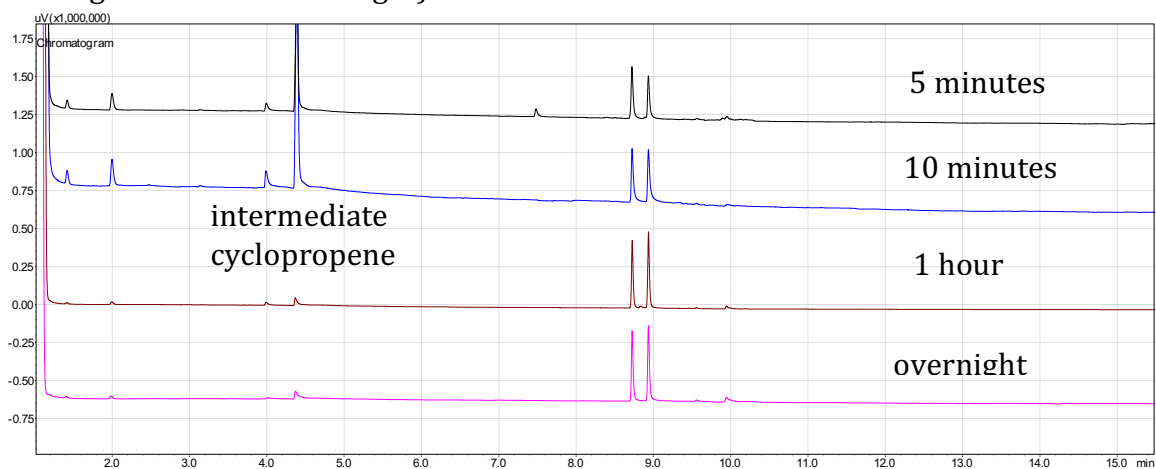

GC 7g (exo)

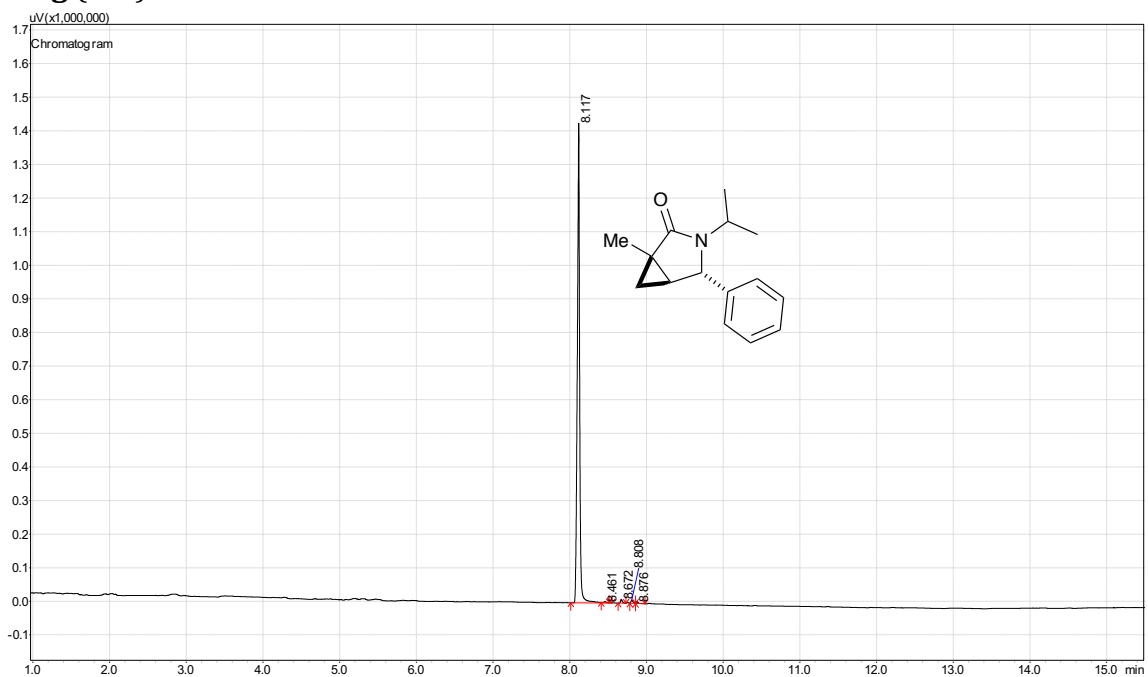

| Peak# | Ret.Time | Area      | Height    | Conc.    |
|-------|----------|-----------|-----------|----------|
| 1     | 0.035    | 3928.3    | 1297.1    | 0.09157  |
| 2     | 8.117    | 3014048.4 | 1386820.6 | 97.90870 |
| 3     | 8.461    | 6357.1    | 2903.4    | 0.20498  |
| 4     | 8.672    | 18741.1   | 11329.0   | 0.79982  |
| 5     | 8.808    | 18026.2   | 9723.3    | 0.68646  |
| 6     | 8.876    | 8448.1    | 4369.4    | 0.30847  |

### GC 7g (endo)

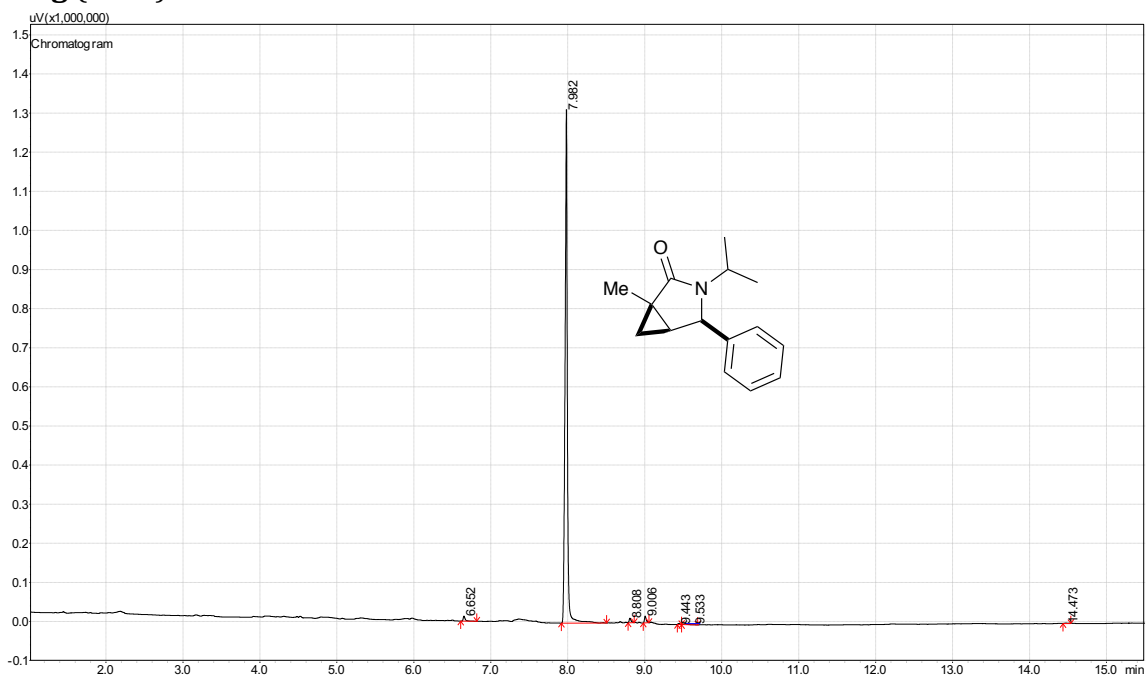

| Peak# | Ret.Time | Area      | Height    | Conc.    |
|-------|----------|-----------|-----------|----------|
| 1     | 6.652    | 24564.6   | 12723.7   | 0.95680  |
| 2     | 7.982    | 2721244.3 | 1282749.1 | 96.46021 |
| 3     | 8.808    | 20417.8   | 11802.7   | 0.88754  |
| 4     | 9.006    | 29208.2   | 16177.6   | 1.21653  |
| 5     | 9.443    | 4047.3    | 2391.9    | 0.17986  |
| 6     | 9.533    | 8840.5    | 2594.0    | 0.19506  |
| 7     | 14.473   | 6318.5    | 1383.1    | 0.10401  |

Time profile of the analytical run for **7g** (preparative run was quenched after 3 hrs)

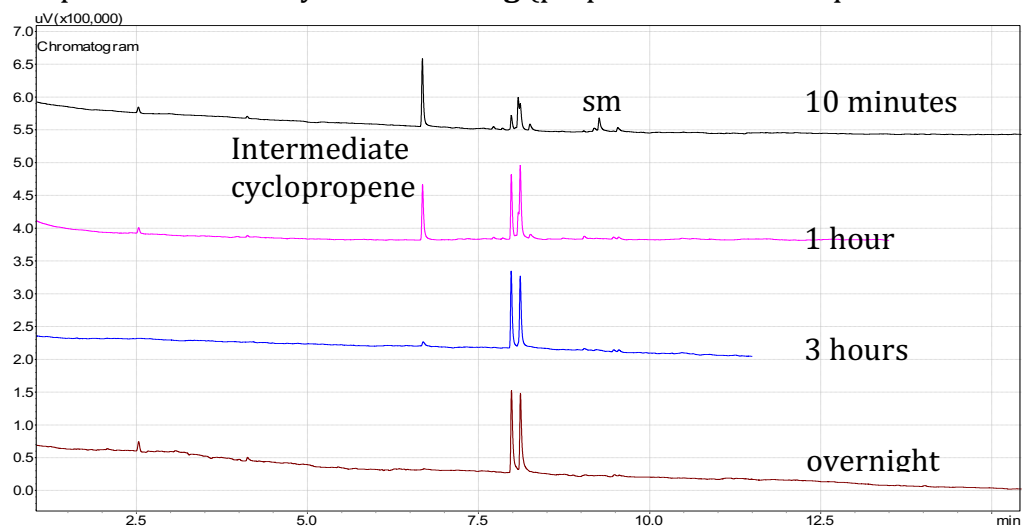

## GC of 7h

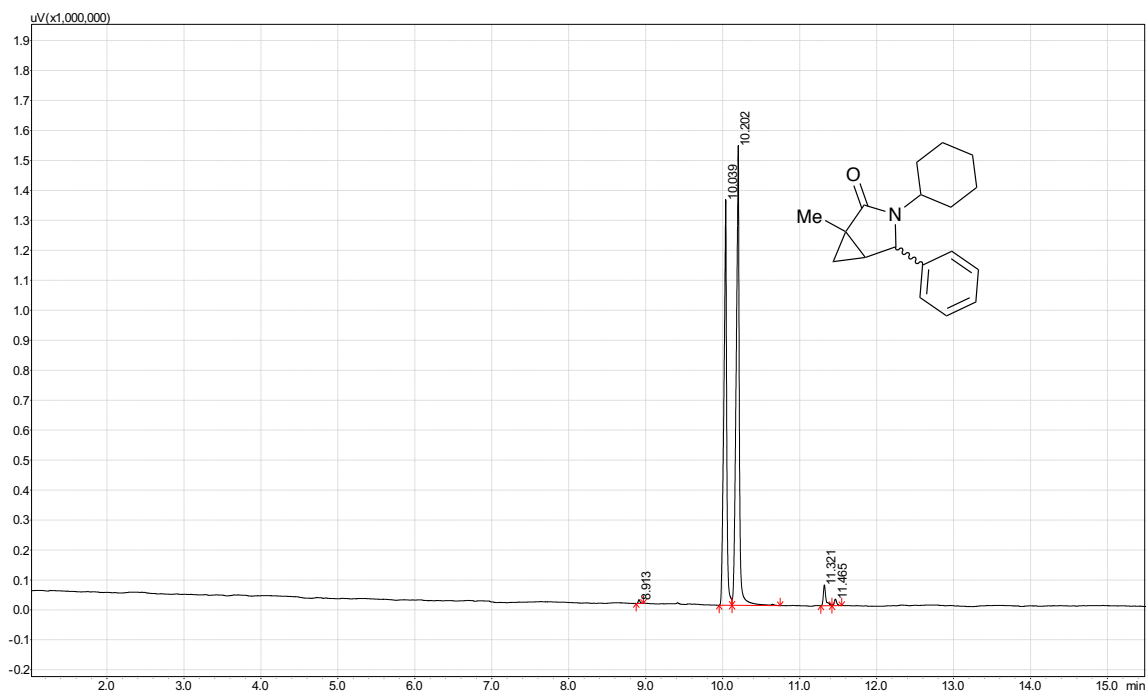

| Peak# | Ret.Time | Area      | Height    | Conc.    |
|-------|----------|-----------|-----------|----------|
| 1     | 8.913    | 18482.1   | 11316.6   | 0.39244  |
| 2     | 10.039   | 3404166.7 | 1309495.3 | 45.41159 |
| 3     | 10.202   | 4321507.0 | 1473928.4 | 51.11392 |
| 4     | 11.321   | 160962.5  | 66814.8   | 2.31705  |
| 5     | 11.465   | 49775.5   | 22059.5   | 0.76499  |

Time profile of the analytical run for **7h** (preparative run was quenched after running the reaction overnight)

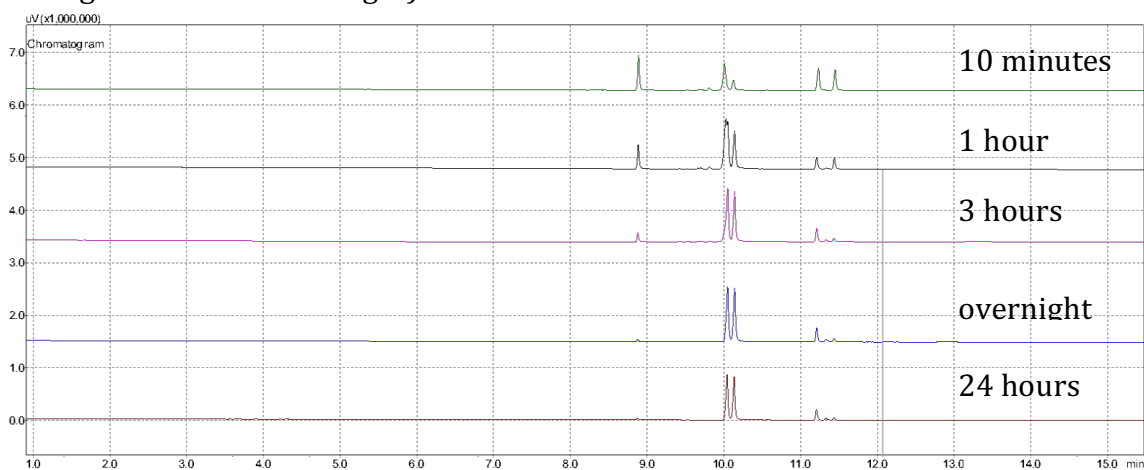

## GC of 7i

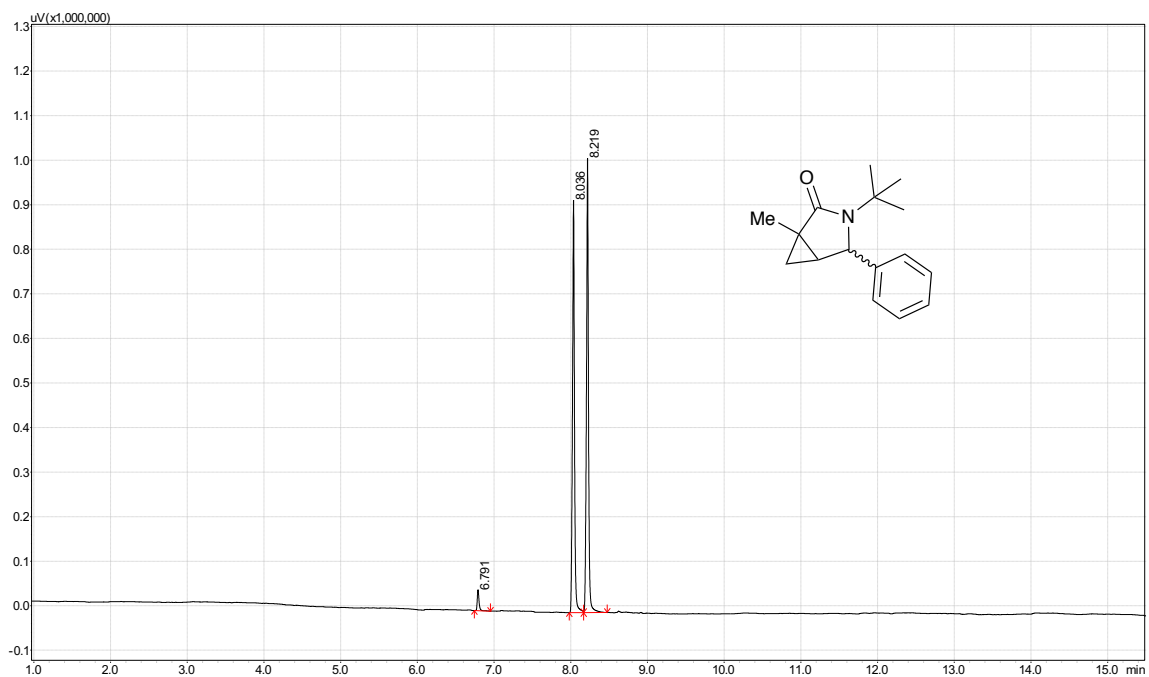

| Peak# | Ret.Time | Area      | Height   | Conc.    |
|-------|----------|-----------|----------|----------|
| 1     | 6.791    | 77040.2   | 45676.5  | 2.41556  |
| 2     | 8.036    | 1670496.8 | 869434.7 | 45.97927 |
| 3     | 8.219    | 1865151.8 | 975816.5 | 51.60517 |

Time profile of the analytical run for **7i** (preparative run was quenched after running the reaction overnight)

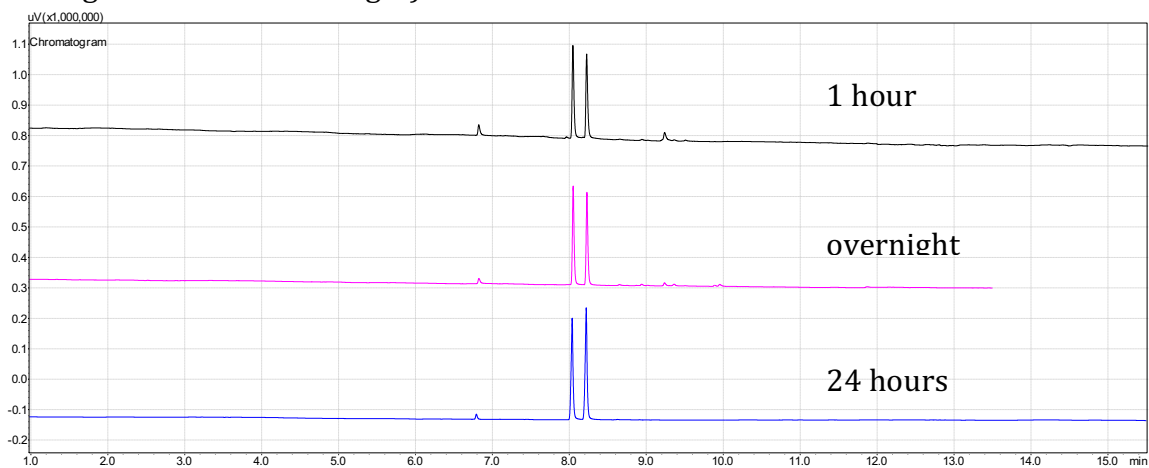

## GC of 7j

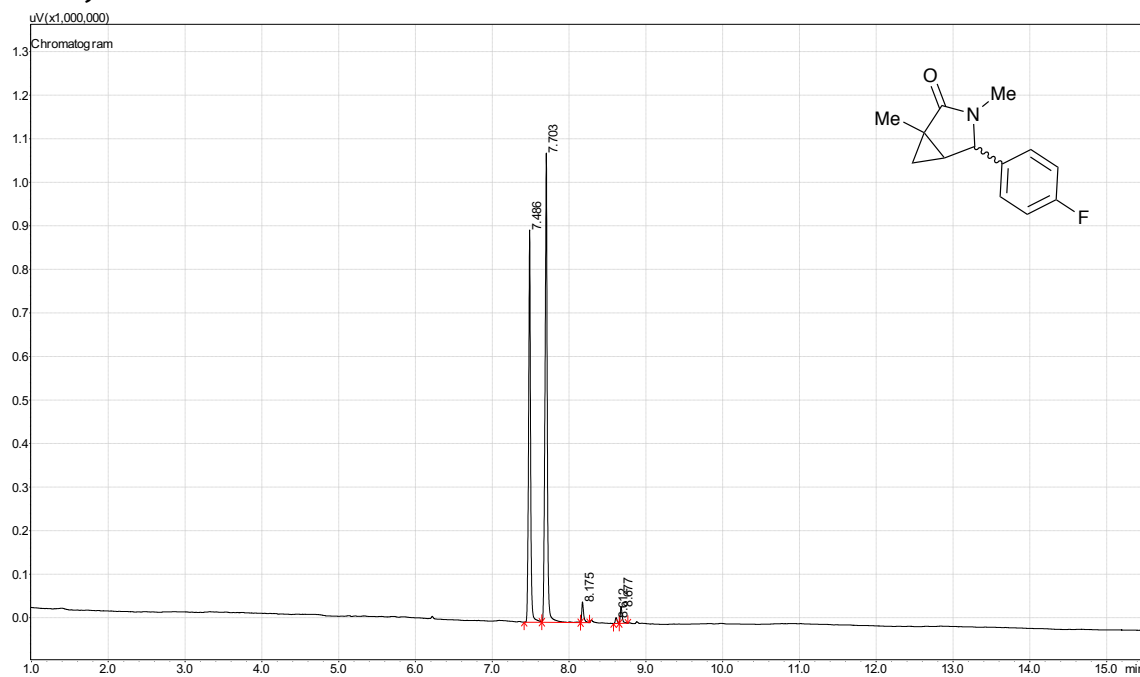

| Peak# | Ret.Time | Area      | Height    | Conc.    |
|-------|----------|-----------|-----------|----------|
| 1     | 7.486    | 1594262.4 | 863170.5  | 42.58879 |
| 2     | 7.703    | 2181284.7 | 1064589.1 | 52.52678 |
| 3     | 8.175    | 82979.3   | 47607.0   | 2.34893  |
| 4     | 8.612    | 22394.6   | 13118.4   | 0.64726  |
| 5     | 8.677    | 66519.2   | 38270.0   | 1.88824  |

Time profile of the analytical run for **7j** (preparative run was quenched after 4 hours)

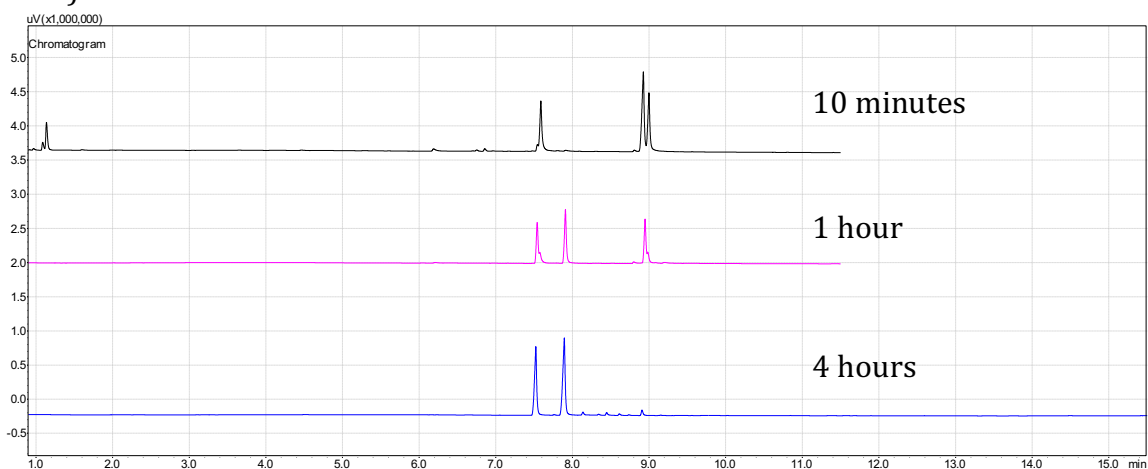



## GC of 7k

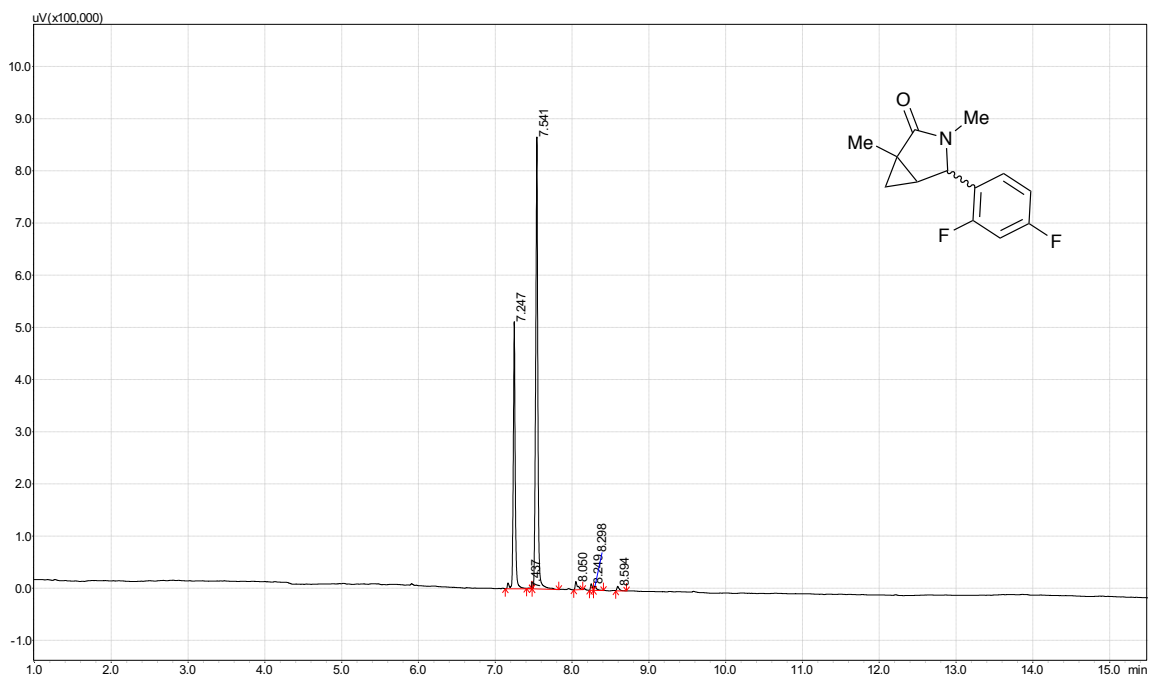

| Peak# | Ret.Time | Area      | Height   | Conc.    |
|-------|----------|-----------|----------|----------|
| 1     | 7.247    | 901056.9  | 476269.3 | 35.30059 |
| 2     | 7.437    | 2490.4    | 1466.6   | 0.10870  |
| 3     | 7.541    | 1687628.2 | 825419.7 | 61.17926 |
| 4     | 8.050    | 36874.2   | 15616.9  | 1.15751  |
| 5     | 8.249    | 21354.2   | 12908.6  | 0.95678  |
| 6     | 8.298    | 19015.8   | 8461.6   | 0.62716  |
| 7     | 8.594    | 19205.9   | 9039.4   | 0.66999  |

Time profile of the analytical run for **7k** (preparative run was quenched after 5 minutes)

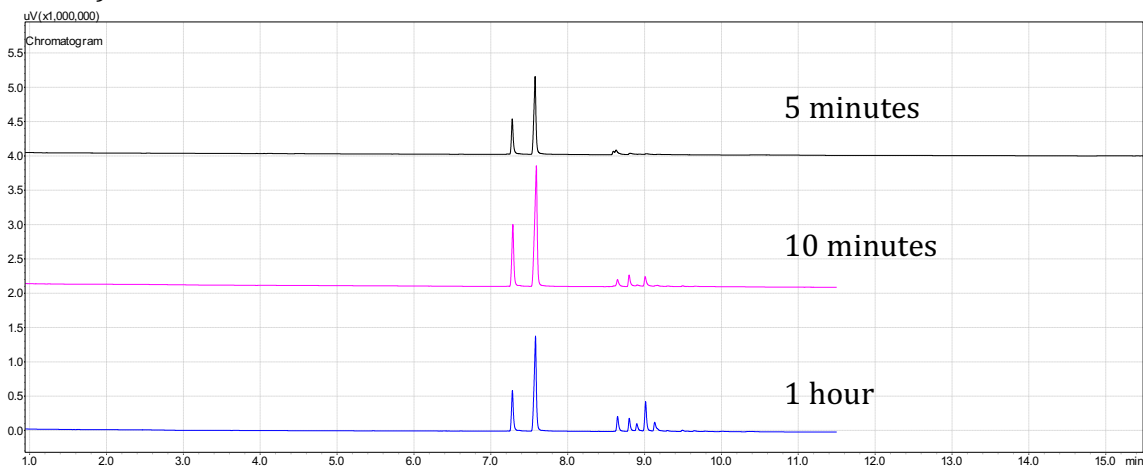

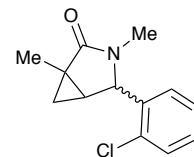

## GC of **71**

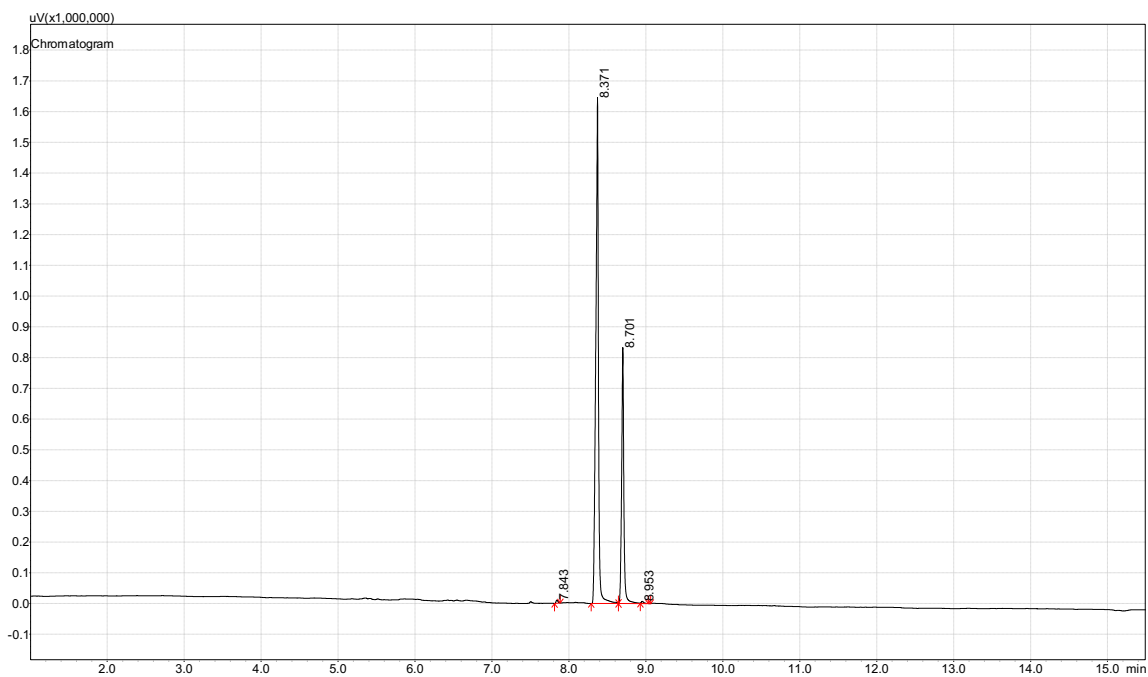

| Peak# | Ret.Time | Area      | Height    | Conc.    |
|-------|----------|-----------|-----------|----------|
| 1     | 0.035    | 5331.8    | 1974.6    | 0.08061  |
| 2     | 7.843    | 17591.9   | 10232.2   | 0.41768  |
| 3     | 8.371    | 3947924.9 | 1616903.6 | 66.00226 |
| 4     | 8.701    | 1670731.6 | 814221.4  | 33.23665 |
| 5     | 8.953    | 13539.0   | 6438.1    | 0.26281  |

Time profile of the analytical run for **71** is provided in the main text of this paper (see Figure 2).

## GC of 7m

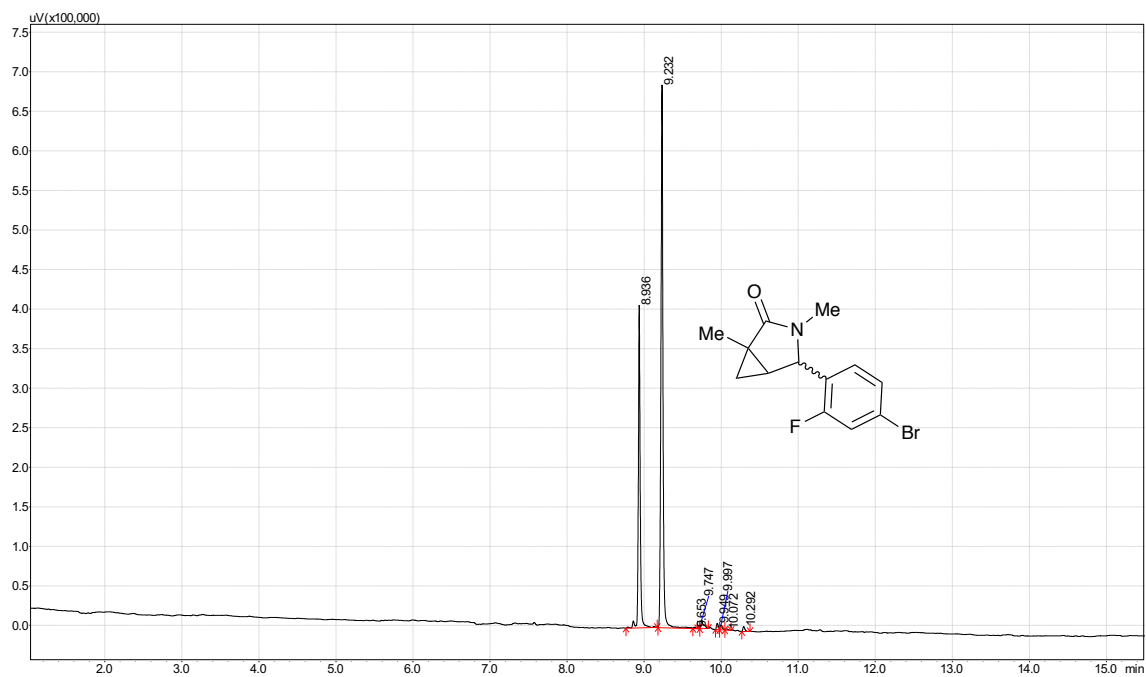

| Peak# | Ret.Time | Area      | Height   | Conc.    |
|-------|----------|-----------|----------|----------|
| 1     | 8.936    | 680871.8  | 366803.9 | 34.35746 |
| 2     | 9.232    | 1263883.2 | 666138.7 | 62.39529 |
| 3     | 9.653    | 2750.9    | 1509.1   | 0.14135  |
| 4     | 9.747    | 26984.1   | 11268.1  | 1.05545  |
| 5     | 9.949    | 14234.2   | 8223.6   | 0.77028  |
| 6     | 9.997    | 11389.6   | 6164.4   | 0.57740  |
| 7     | 10.072   | 3010.3    | 1301.2   | 0.12188  |
| 8     | 10.292   | 11406.5   | 6201.5   | 0.58088  |

Time profile of the analytical run for **7m** is provided in the main text of this paper (see Figure 1).

# GC of 8a

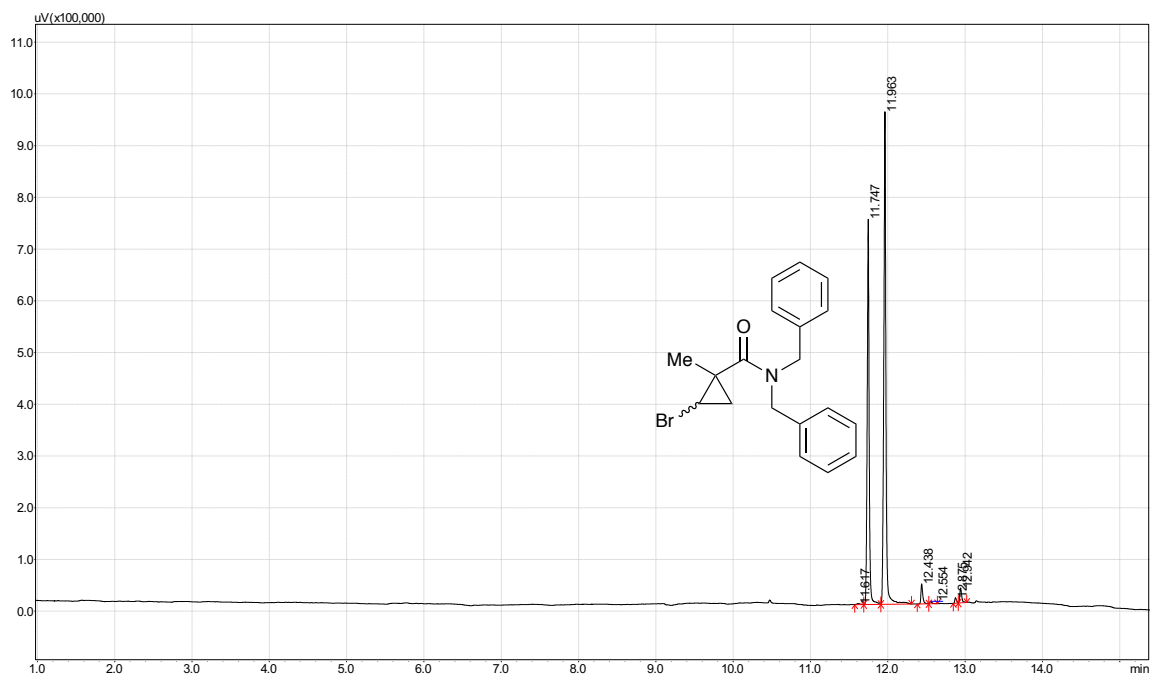

| Peak# | Ret.Time | Area      | Height   | Conc.    |
|-------|----------|-----------|----------|----------|
| 1     | 11.617   | 7422.0    | 1953.0   | 0.11225  |
| 2     | 11.747   | 1295355.6 | 716860.8 | 41.19972 |
| 3     | 11.963   | 1807786.1 | 939498.6 | 53.99525 |
| 4     | 12.438   | 65312.4   | 38289.8  | 2.20061  |
| 5     | 12.554   | 9548.9    | 4615.7   | 0.26528  |
| 6     | 12.875   | 17194.9   | 10324.4  | 0.59337  |
| 7     | 12.942   | 49914.3   | 28422.8  | 1.63353  |

# GC of 8b

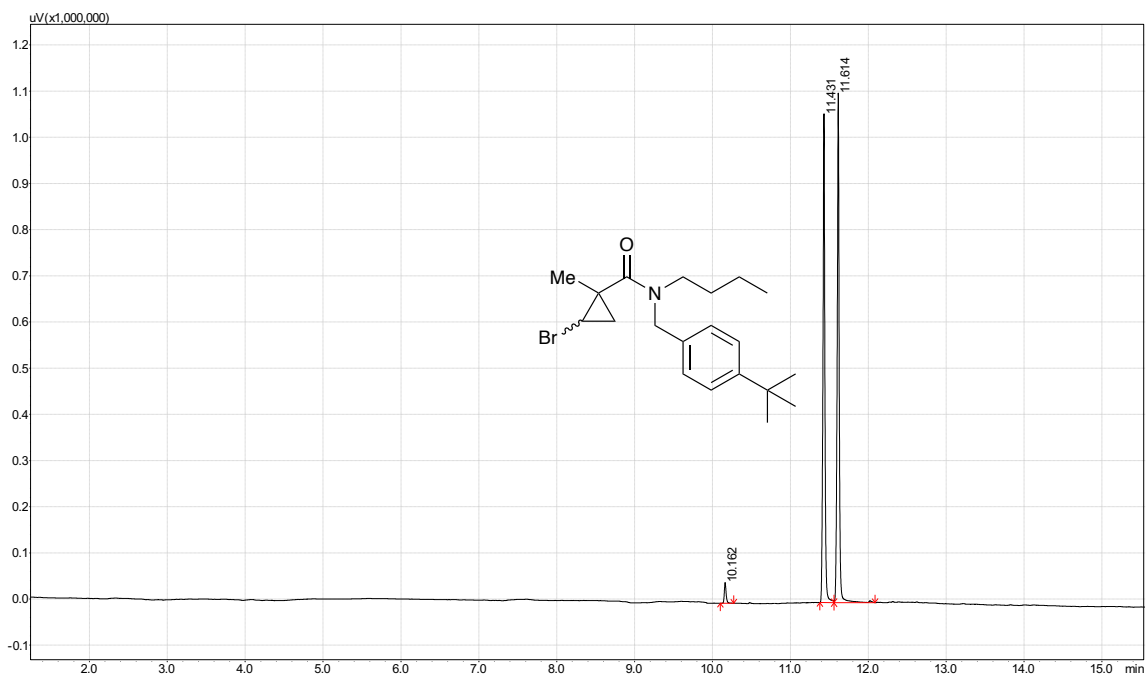

| Peak# | Ret.Time | Area      | Height    | Conc.    |
|-------|----------|-----------|-----------|----------|
| 1     | 10.162   | 74207.6   | 44897.5   | 2.06991  |
| 2     | 11.431   | 1821445.4 | 1035409.6 | 47.73551 |
| 3     | 11.614   | 1987139.5 | 1088748.2 | 50.19458 |

# GC of 8c

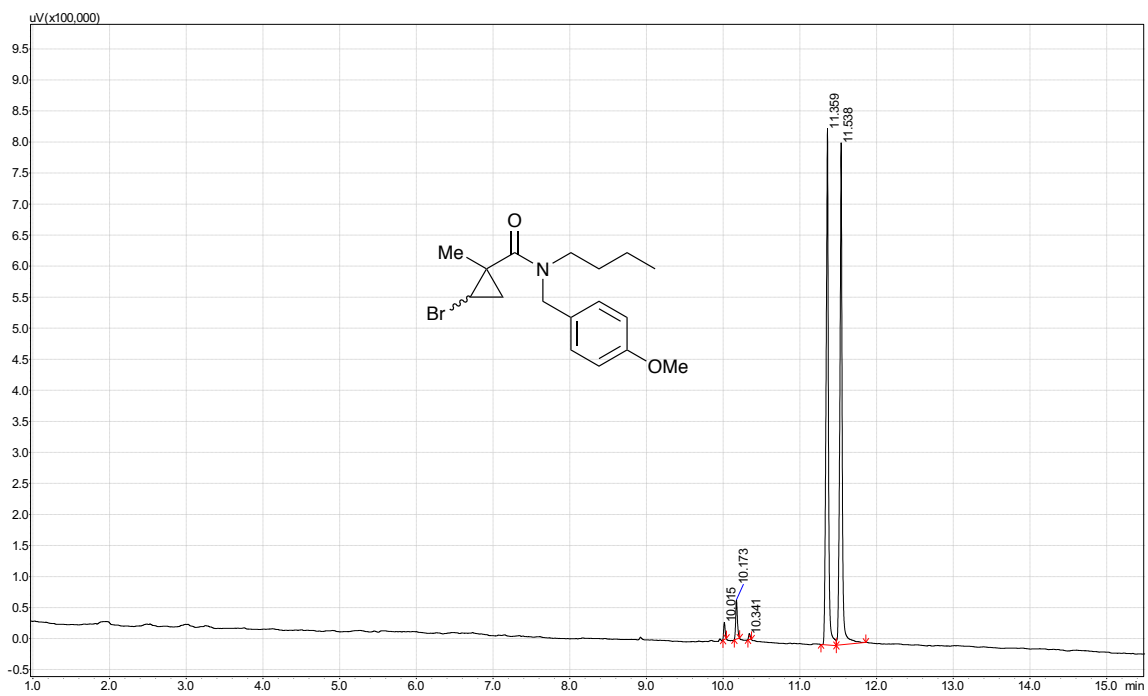

| Peak# | Ret.Time | Area      | Height   | Conc.    |
|-------|----------|-----------|----------|----------|
| 1     | 10.015   | 37582.4   | 26132.0  | 1.57253  |
| 2     | 10.173   | 74353.9   | 50833.2  | 3.05896  |
| 3     | 10.341   | 14547.1   | 9209.9   | 0.55422  |
| 4     | 11.359   | 1759485.3 | 785205.4 | 47.25092 |
| 5     | 11.538   | 1701170.2 | 790397.4 | 47.56336 |

# GC of 8d

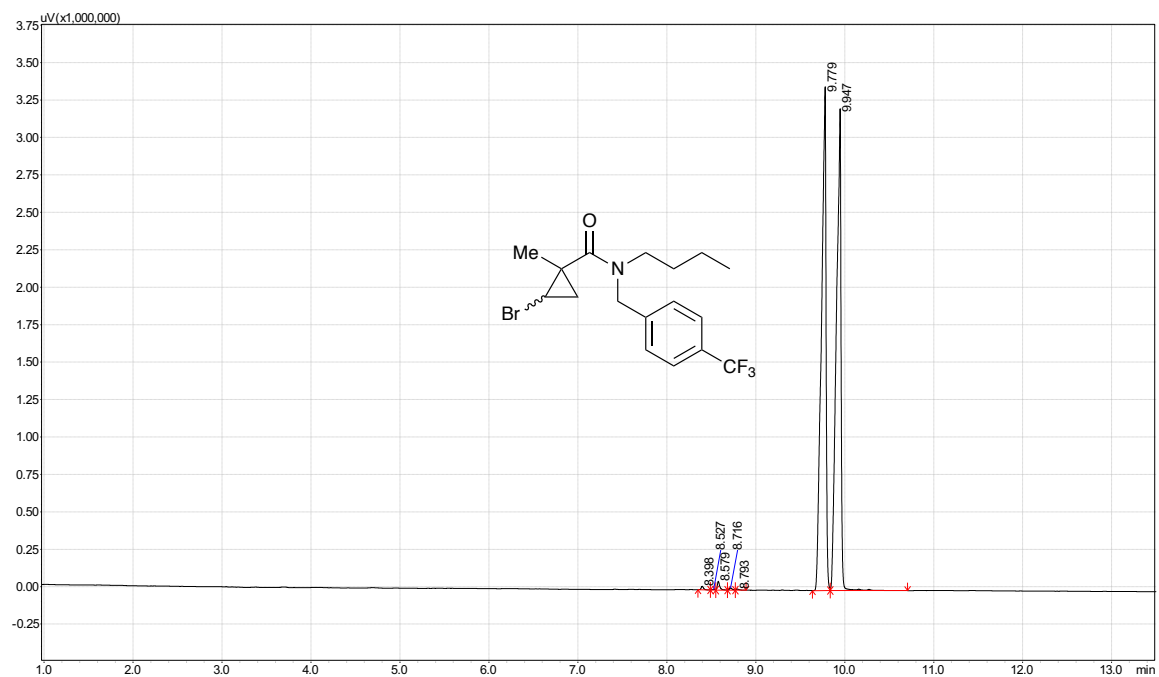

| Peak# | Ret.Time | Area       | Height    | Conc.    |
|-------|----------|------------|-----------|----------|
| 1     | 8.398    | 47667.3    | 24329.6   | 0.36693  |
| 2     | 8.527    | 9954.6     | 4243.6    | 0.06400  |
| 3     | 8.579    | 116097.8   | 58677.9   | 0.88497  |
| 4     | 8.716    | 31642.1    | 14460.6   | 0.21809  |
| 5     | 8.793    | 16414.2    | 7283.4    | 0.10985  |
| 6     | 9.779    | 12077544.7 | 3336961.5 | 50.32732 |
| 7     | 9.947    | 11630985.1 | 3184560.5 | 48.02884 |

# GC of 8e

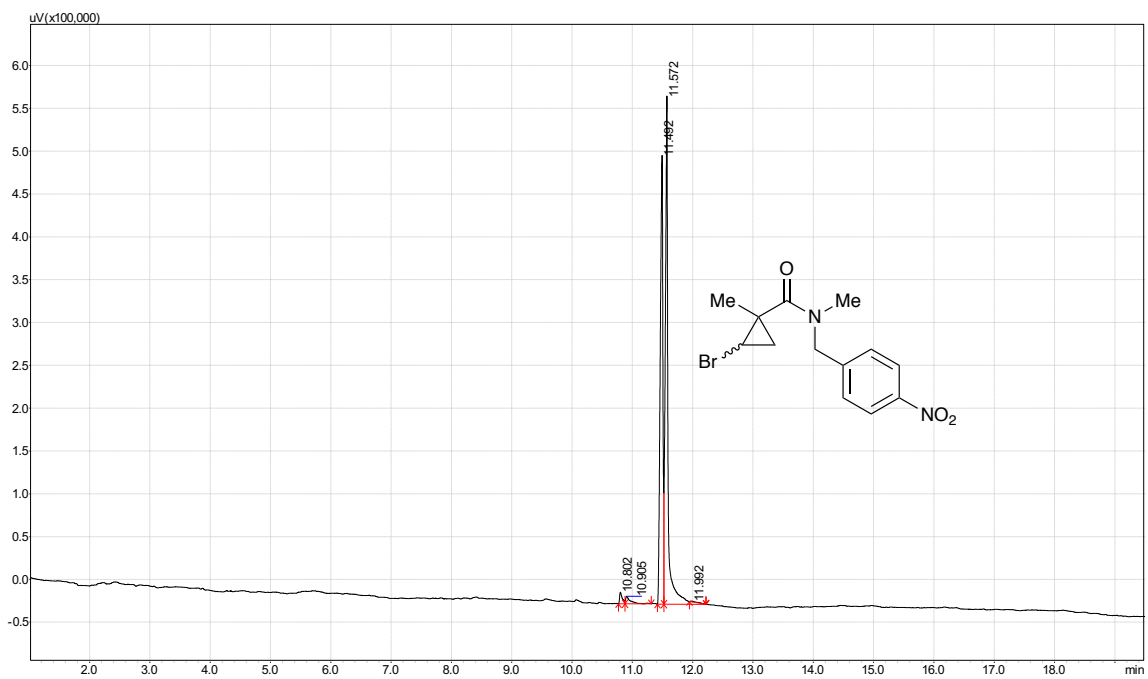

| Peak# | Ret.Time | Area      | Height   | Conc.    |
|-------|----------|-----------|----------|----------|
| 1     | 10.802   | 42408.1   | 13390.4  | 1.18215  |
| 2     | 10.905   | 44894.0   | 8657.8   | 0.76434  |
| 3     | 11.492   | 1585406.5 | 521545.0 | 46.04400 |
| 4     | 11.572   | 1873705.6 | 588114.9 | 51.92105 |
| 5     | 11.992   | 7995.4    | 1001.9   | 0.08846  |



# GC of 8f

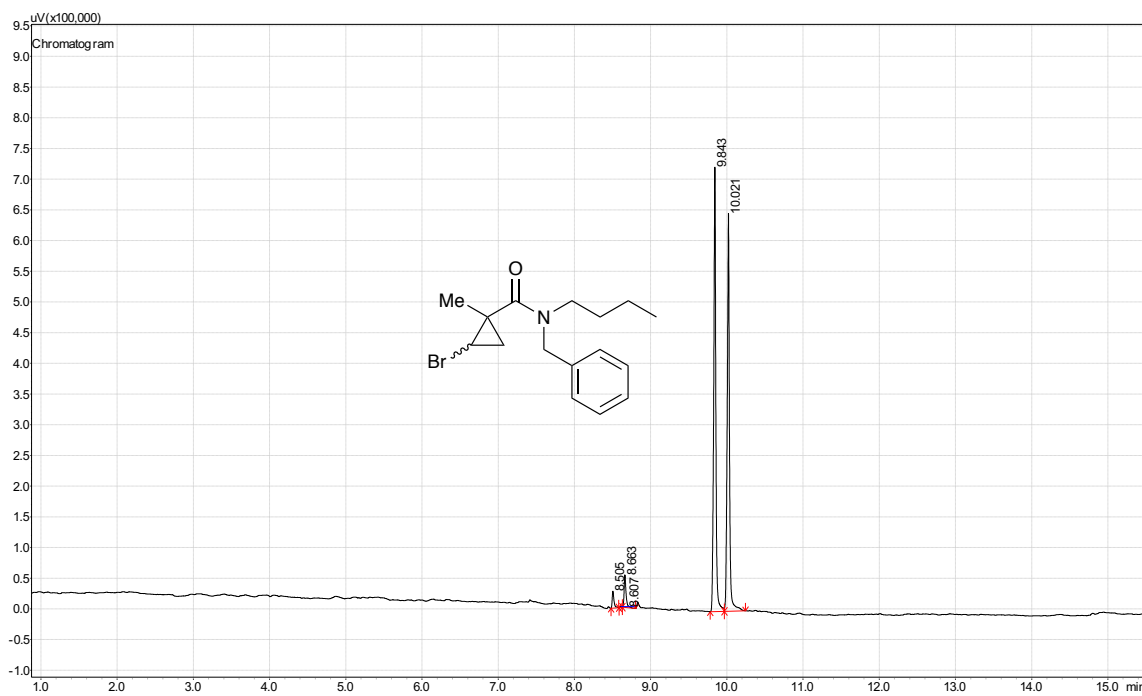

| Peak# | Ret.Time | Area      | Height   | Conc.    |
|-------|----------|-----------|----------|----------|
| 1     | 8.505    | 45430.1   | 27268.3  | 1.91727  |
| 2     | 8.607    | 1845.1    | 1478.6   | 0.10396  |
| 3     | 8.663    | 94428.5   | 51467.4  | 3.61875  |
| 4     | 9.843    | 1399540.2 | 703479.5 | 49.46269 |
| 5     | 10.021   | 1319650.5 | 638548.9 | 44.89732 |

# GC of 8g

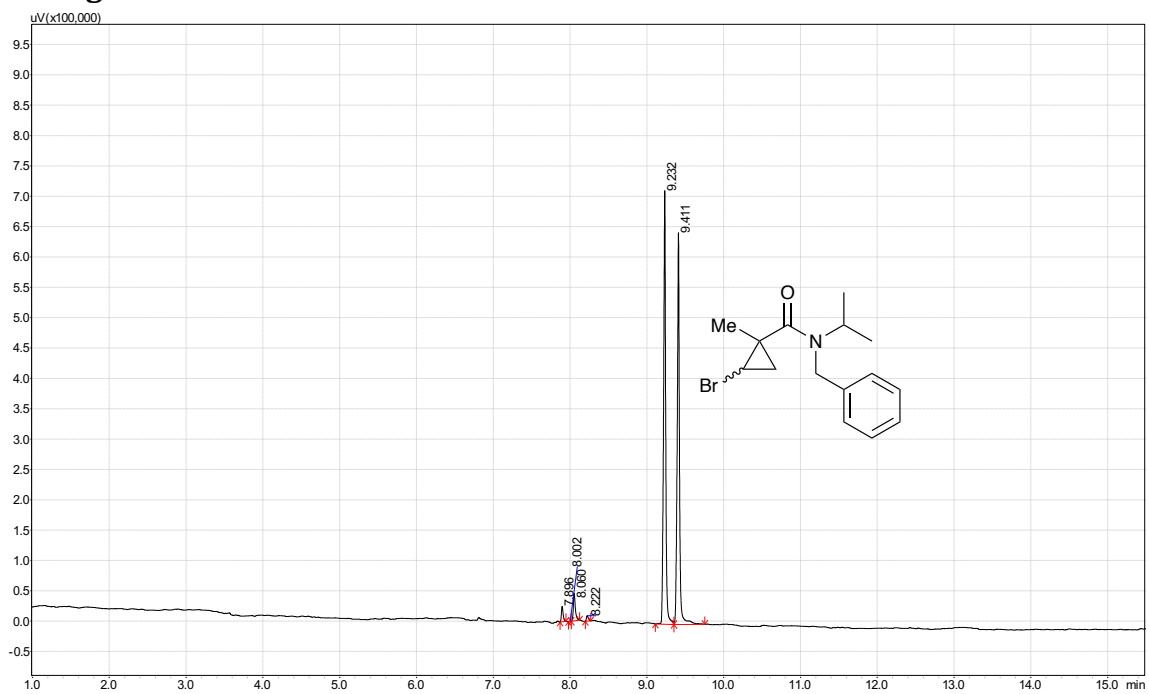

| Peak# | Ret.Time | Area      | Height   | Conc.    |
|-------|----------|-----------|----------|----------|
| 1     | 7.896    | 41253.9   | 24848.7  | 1.76551  |
| 2     | 8.002    | 681.5     | 448.4    | 0.03186  |
| 3     | 8.060    | 83053.6   | 32668.5  | 2.32110  |
| 4     | 8.222    | 16736.1   | 8853.0   | 0.62901  |
| 5     | 9.232    | 1375266.7 | 702619.6 | 49.92135 |
| 6     | 9.411    | 1313624.5 | 638015.1 | 45.33118 |

# GC of 8h

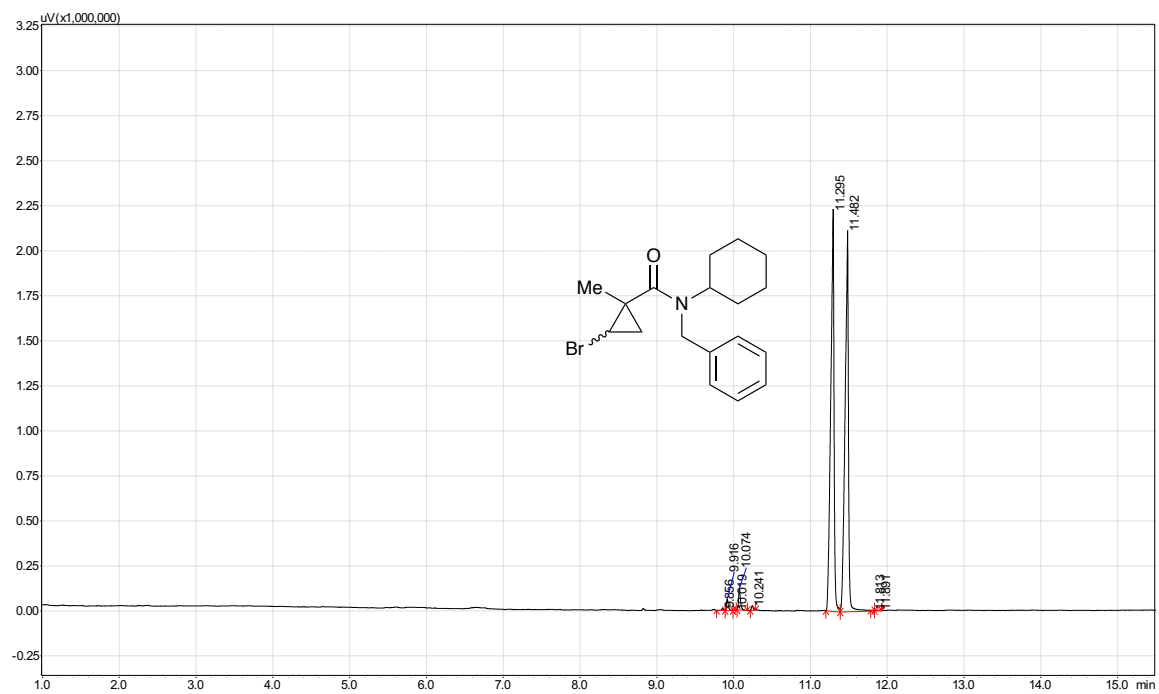

| Peak# | Ret.Time | Area      | Height    | Conc.    |
|-------|----------|-----------|-----------|----------|
| 1     | 9.856    | 20537.8   | 10778.3   | 0.23921  |
| 2     | 9.916    | 106765.5  | 60035.2   | 1.33242  |
| 3     | 10.019   | 2482.8    | 1974.7    | 0.04383  |
| 4     | 10.074   | 208751.5  | 110113.4  | 2.44386  |
| 5     | 10.241   | 40970.0   | 25587.8   | 0.56789  |
| 6     | 11.295   | 6582384.9 | 2200599.2 | 48.84009 |
| 7     | 11.482   | 6464216.5 | 2092439.5 | 46.43959 |
| 8     | 11.813   | 3892.6    | 1933.0    | 0.04290  |
| 9     | 11.891   | 8138.7    | 2262.4    | 0.05021  |

# GC of 8i

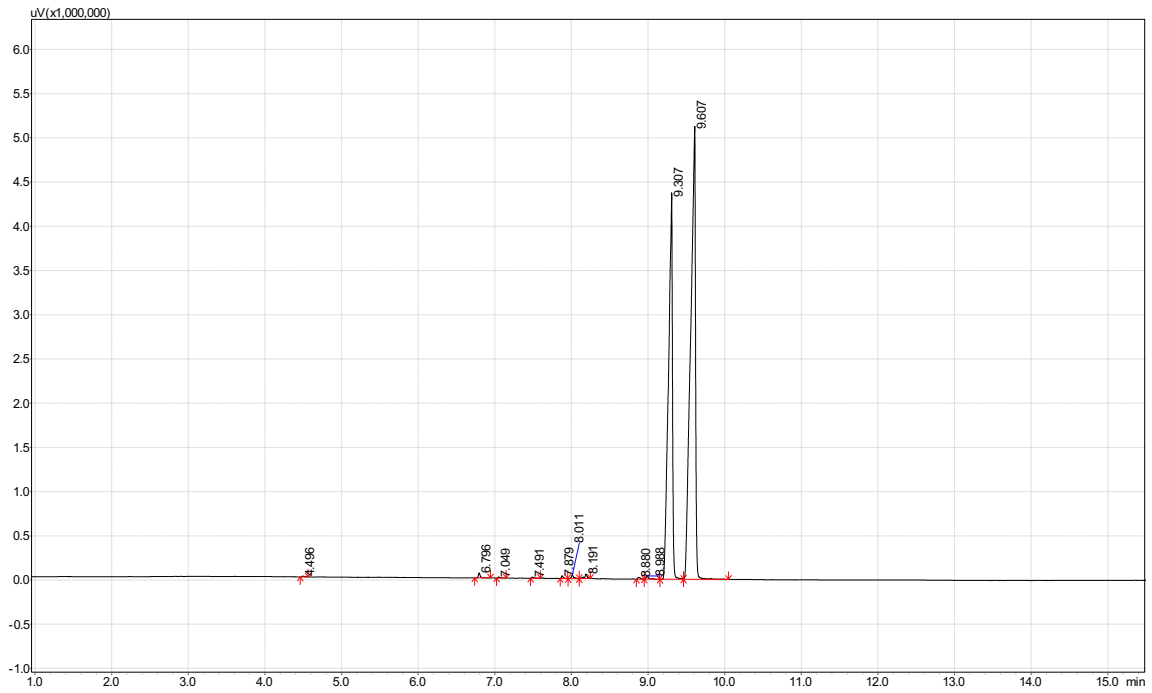

| Peak# | Ret.Time | Area       | Height    | Conc.    |
|-------|----------|------------|-----------|----------|
| 1     | 4.496    | 20326.6    | 9473.7    | 0.09933  |
| 2     | 6.796    | 94409.3    | 56234.8   | 0.58961  |
| 3     | 7.049    | 22661.1    | 12516.4   | 0.13123  |
| 4     | 7.491    | 30494.2    | 12133.2   | 0.12721  |
| 5     | 7.879    | 48337.3    | 27963.1   | 0.29319  |
| 6     | 8.011    | 83217.1    | 39487.1   | 0.41401  |
| 7     | 8.191    | 124108.9   | 51054.6   | 0.53530  |
| 8     | 8.880    | 48580.5    | 21017.6   | 0.22036  |
| 9     | 8.988    | 88382.5    | 34419.1   | 0.36088  |
| 10    | 9.307    | 15692983.0 | 4320112.0 | 45.29549 |
| 11    | 9.607    | 22515184.7 | 4953209.3 | 51.93338 |

GC of *trans*-8i

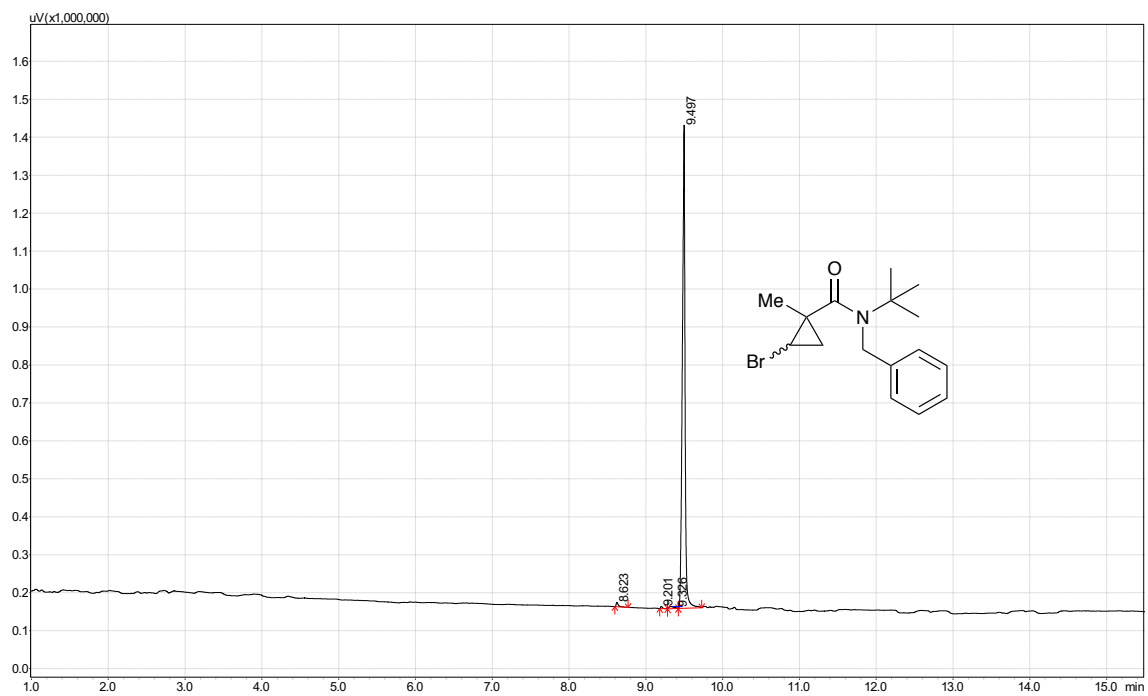

| Peak# | Ret.Time | Area      | Height    | Conc.    |
|-------|----------|-----------|-----------|----------|
| 1     | 8.623    | 24559.3   | 11558.8   | 0.93082  |
| 2     | 9.201    | 9508.9    | 5718.7    | 0.46052  |
| 3     | 9.326    | 28295.6   | 5710.2    | 0.45983  |
| 4     | 9.497    | 3088292.0 | 1218799.1 | 98.14882 |

GC of *cis*-8i

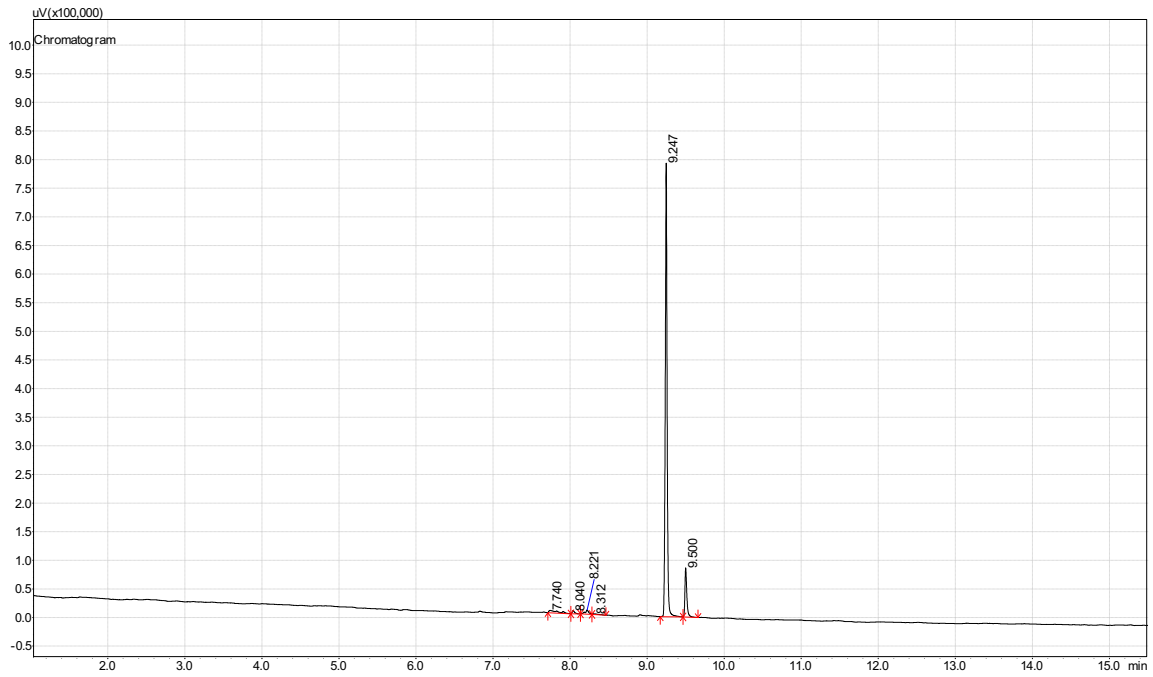

| Peak# | Ret.Time | Area      | Height   | Conc.    |
|-------|----------|-----------|----------|----------|
| 1     | 7.740    | 37990.2   | 4190.7   | 0.47326  |
| 2     | 8.040    | 12014.0   | 5738.7   | 0.64807  |
| 3     | 8.221    | 24531.3   | 7249.0   | 0.81863  |
| 4     | 8.312    | 7056.0    | 1340.5   | 0.15138  |
| 5     | 9.247    | 1322956.1 | 782000.9 | 88.31139 |
| 6     | 9.500    | 147487.8  | 84984.3  | 9.59728  |

# GC of 8j

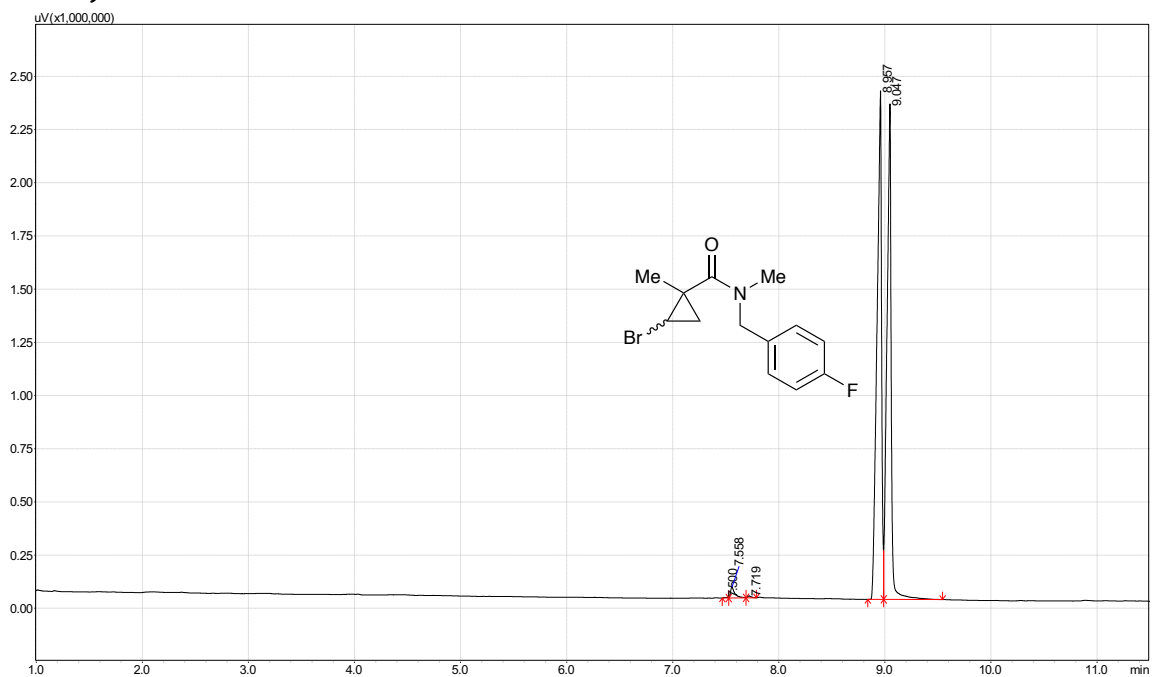

| Peak# | Ret.Time | Area      | Height    | Conc.    |
|-------|----------|-----------|-----------|----------|
| 1     | 7.500    | 7723.1    | 2887.8    | 0.06097  |
| 2     | 7.558    | 143708.5  | 50909.5   | 1.07486  |
| 3     | 7.719    | 21658.6   | 8787.7    | 0.18554  |
| 4     | 8.957    | 7066063.2 | 2370123.5 | 50.04096 |
| 5     | 9.047    | 6450796.1 | 2303658.8 | 48.63767 |

# GC of 8k

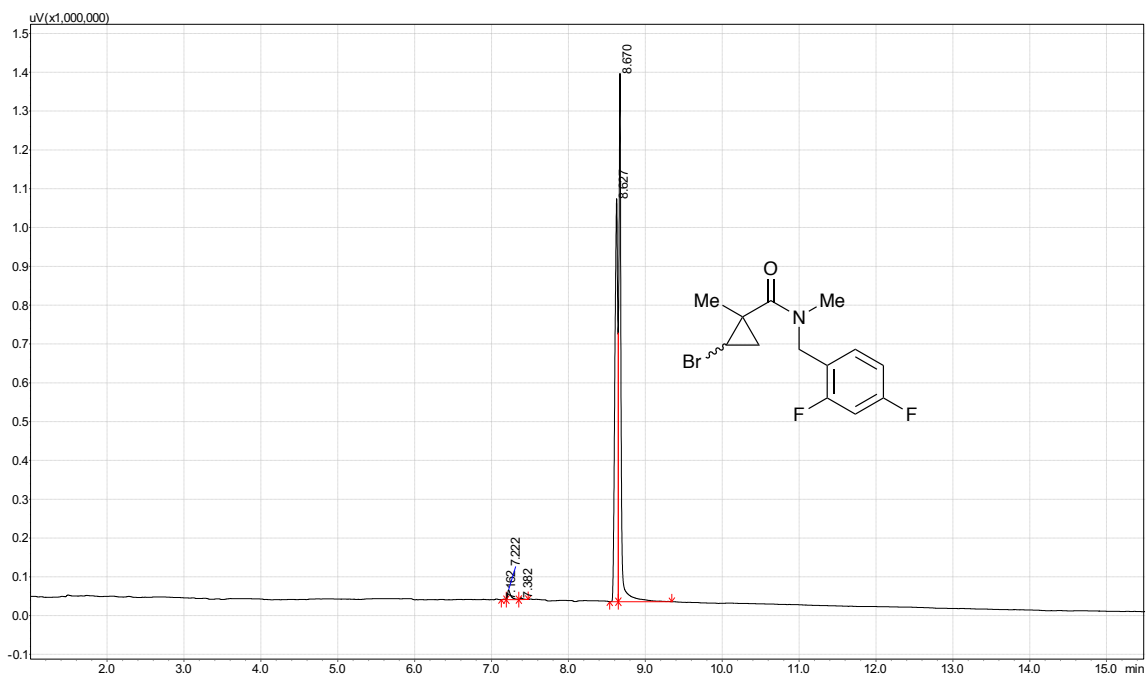

| Peak# | Ret.Time | Area      | Height    | Conc.    |
|-------|----------|-----------|-----------|----------|
| 1     | 7.162    | 3444.1    | 1336.5    | 0.05589  |
| 2     | 7.222    | 69320.8   | 24946.0   | 1.04323  |
| 3     | 7.382    | 10844.7   | 4248.9    | 0.17769  |
| 4     | 8.627    | 2716262.0 | 1034776.1 | 43.27395 |
| 5     | 8.670    | 2740754.7 | 1325914.3 | 55.44924 |



# GC of 8I

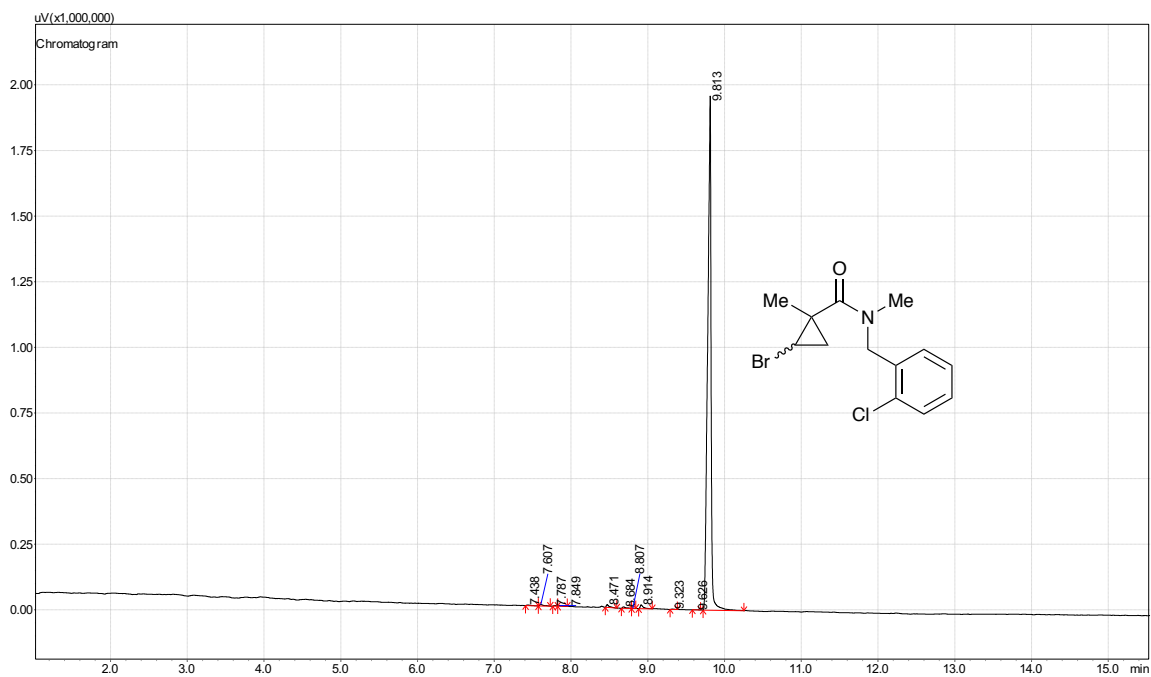

| Peak# | Ret.Time | Area      | Height    | Conc.    |
|-------|----------|-----------|-----------|----------|
| 1     | 7.438    | 9253.9    | 2449.4    | 0.12374  |
| 2     | 7.607    | 19411.0   | 5367.9    | 0.27118  |
| 3     | 7.787    | 5470.5    | 2250.4    | 0.11369  |
| 4     | 7.849    | 7411.4    | 2158.8    | 0.10906  |
| 5     | 8.471    | 30551.1   | 10663.8   | 0.53873  |
| 6     | 8.684    | 19342.6   | 5604.5    | 0.28313  |
| 7     | 8.807    | 2536.5    | 1105.4    | 0.05584  |
| 8     | 8.914    | 38712.2   | 14256.9   | 0.72024  |
| 9     | 9.323    | 3177.5    | 1309.0    | 0.06613  |
| 10    | 9.626    | 2937.2    | 1002.8    | 0.05066  |
| 11    | 9.813    | 5991022.4 | 1933280.6 | 97.66758 |

# GC of 8m

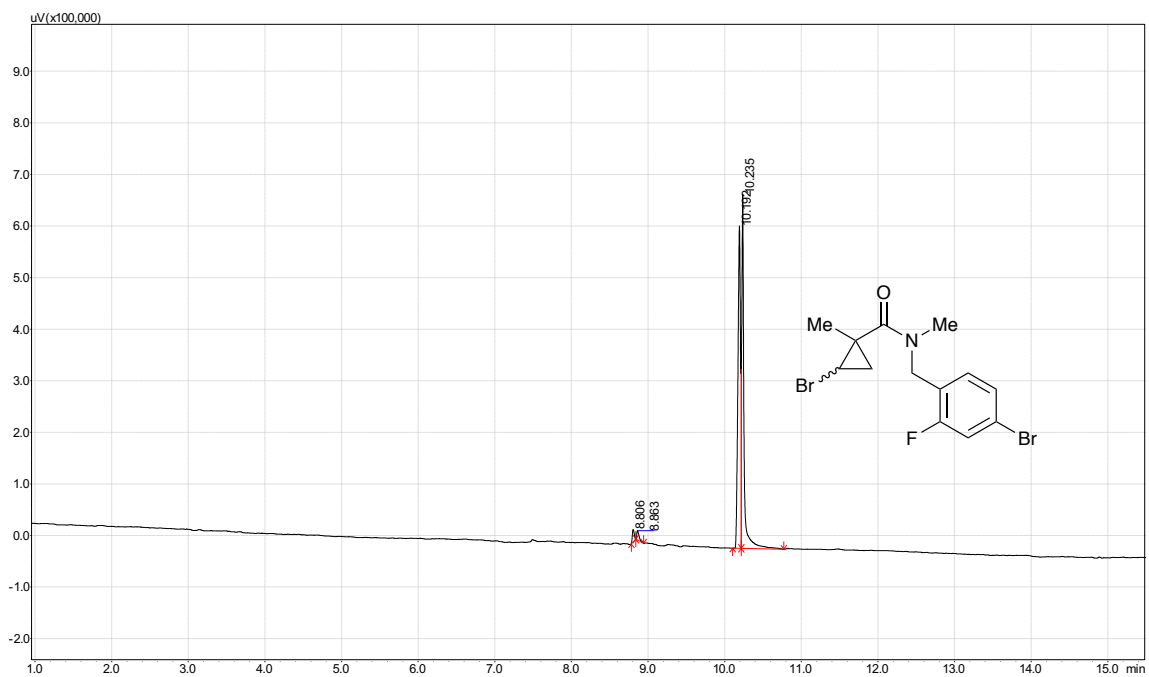

| Peak# | Ret.Time | Area      | Height   | Conc.    |
|-------|----------|-----------|----------|----------|
| 1     | 8.806    | 42579.5   | 23767.5  | 1.79752  |
| 2     | 8.863    | 37720.2   | 18148.3  | 1.37255  |
| 3     | 10.192   | 1491860.5 | 615102.2 | 46.51976 |
| 4     | 10.235   | 1417870.5 | 665220.6 | 50.31018 |
